# Supplementary material for: Genome-wide maps of ribosomal occupancy provide insights into adaptive evolution and regulatory roles of uORFs during Drosophila development
Source: PubMed Central journal article supplement (PMC6070289; doi:10.1371/journal.pbio.2003903), 2018-07-20
Supplement: pbio.2003903.s027.pdf [file pbio.2003903.s027.pdf]

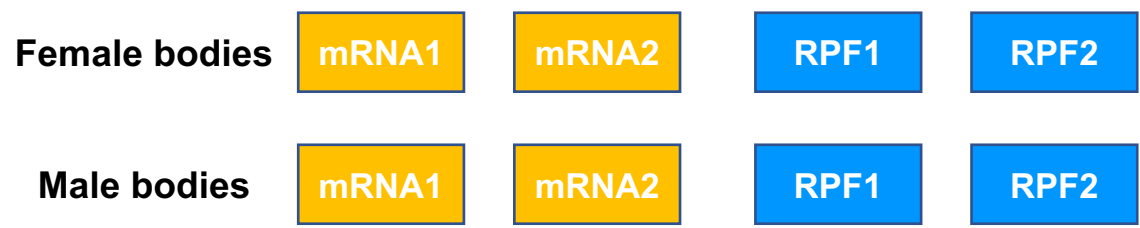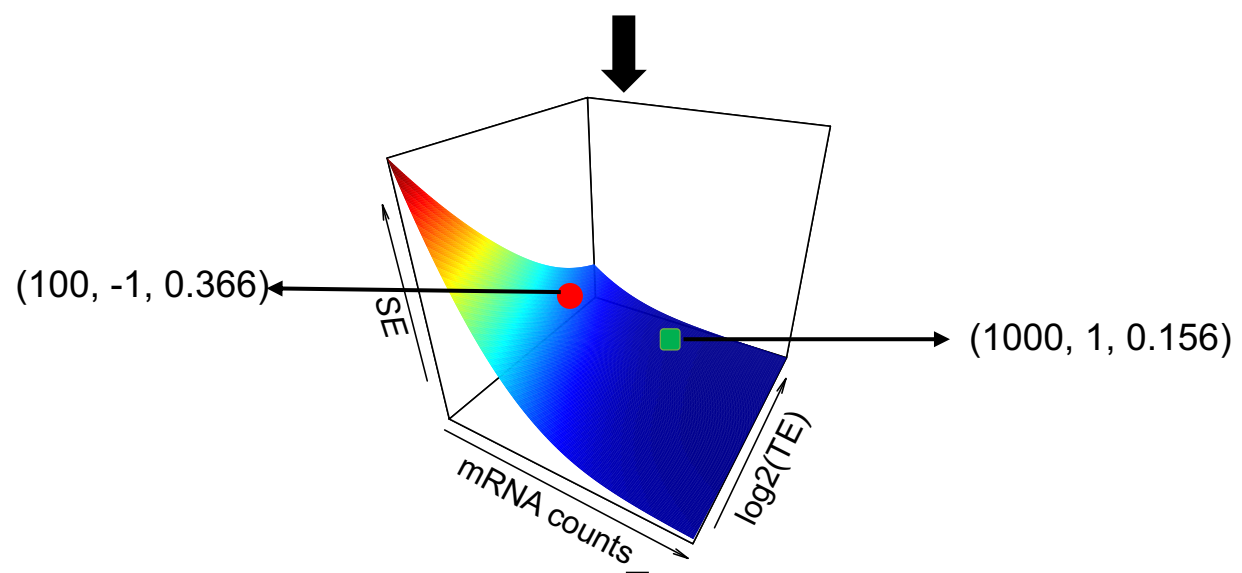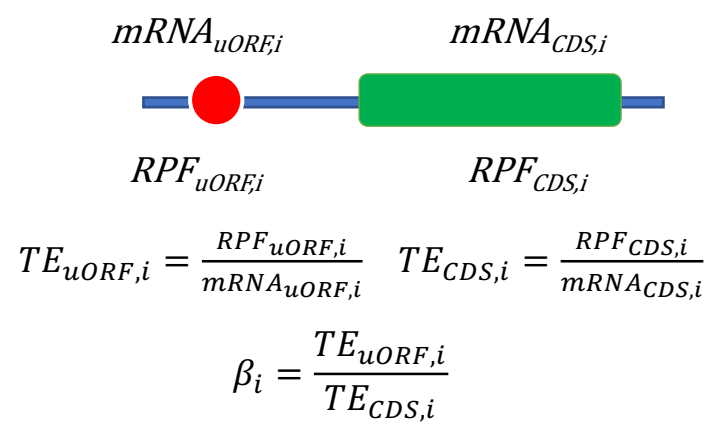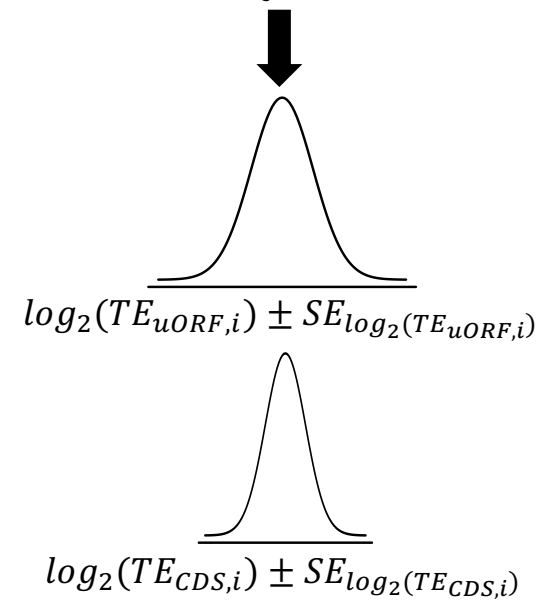

**Wald test**

$$SE_{\log_2(\beta_i)} = \sqrt{SE_{\log_2(TE_{uORF,i})}^2 + SE_{\log_2(TE_{CDS,i})}^2}$$

$$P(\beta_i \neq 1) = 2 \cdot \left( 1 - \Phi \left( \left| \frac{\log_2(\beta_i)}{SE_{\log_2(\beta_i)}} \right| \right) \right)$$

|                                                                                                                                                     |   |                                                                         |   |                                                                            |
|-----------------------------------------------------------------------------------------------------------------------------------------------------|---|-------------------------------------------------------------------------|---|----------------------------------------------------------------------------|
| $mRNA_{uORF,i} = 100$ $mRNA_{CDS,i} = 1000$<br>$RPF_{uORF,i} = 50$ $RPF_{CDS,i} = 2000$<br>$TE_{uORF,i} = 0.5$ $TE_{CDS,i} = 2$<br>$\beta_i = 0.25$ | ➔ | $SE_{\log_2(TE_{uORF,i})} = 0.366$<br>$SE_{\log_2(TE_{CDS,i})} = 0.156$ | ➔ | $SE_{\log_2(\beta_i)} = 0.398$<br>$P(\beta_i \neq 1) = 4.9 \times 10^{-7}$ |
|-----------------------------------------------------------------------------------------------------------------------------------------------------|---|-------------------------------------------------------------------------|---|----------------------------------------------------------------------------|
