# Supplementary material for: Genome-wide maps of ribosomal occupancy provide insights into adaptive evolution and regulatory roles of uORFs during Drosophila development
Source: PubMed Central journal article supplement (PMC6070289; doi:10.1371/journal.pbio.2003903), 2018-07-20
Supplement: pbio.2003903.s030.pdf [file pbio.2003903.s030.pdf]

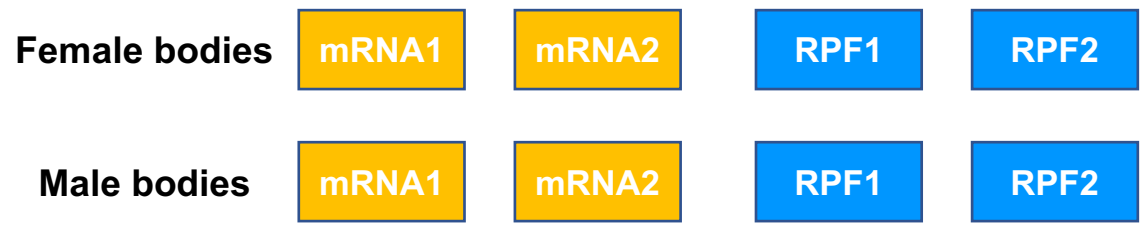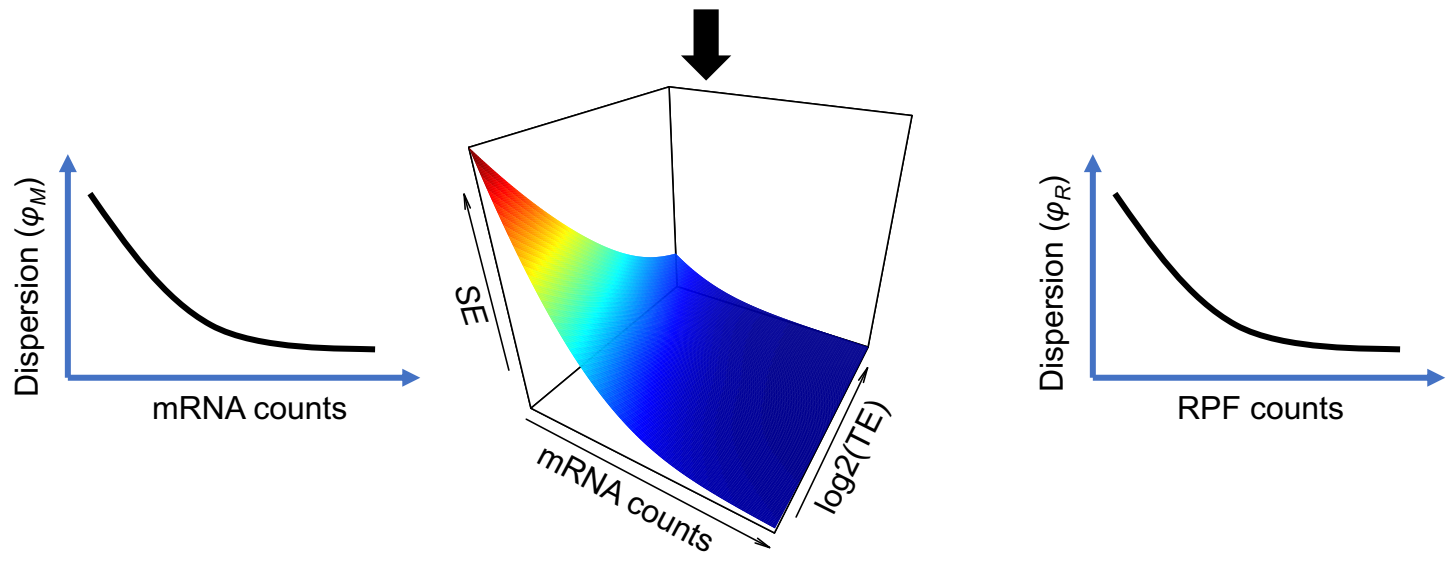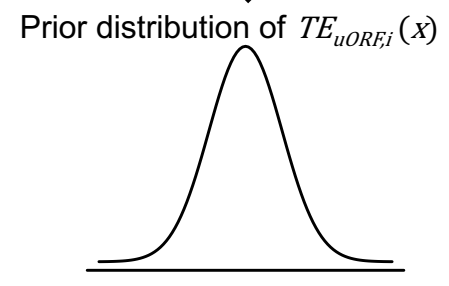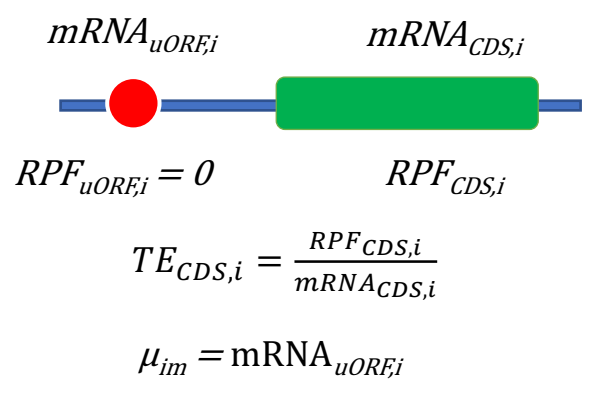

$$f(x) = f_{Norm}(\log_2(x); \log_2(TE_{CDS,i}), 2SE_{\log_2(TE_{CDS,i})}^2)$$

Prior distribution of  $mRNA_{uORF_i}(K_{im})$

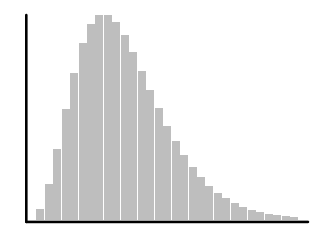

$$g(K_{im}) = f_{NB}(K_{im}; \mu_{im}, \varphi_M(\mu_{im}))$$

$$P_m(R_0) = \int f(x) \sum_{K_{im} \geq 0} g(K_{im}) f_{NB}(0; xK_{im}, \varphi_R(xK_{im})) dx$$

|                                                                                                                             |                                                                  |                                  |
|-----------------------------------------------------------------------------------------------------------------------------|------------------------------------------------------------------|----------------------------------|
| $mRNA_{uORF_i} = 100$ $mRNA_{CDS,i} = 1000$<br>$RPF_{uORF_i} = 0$ $RPF_{CDS,i} = 2000$<br>$\mu_{im} = 100$ $TE_{CDS,i} = 2$ | $SE_{\log_2(TE_{CDS})} = 0.156$<br>$\varphi_M(\mu_{im}) = 0.035$ | $P_m(R_0) = 3.6 \times 10^{-12}$ |
|-----------------------------------------------------------------------------------------------------------------------------|------------------------------------------------------------------|----------------------------------|
