# Supplementary material for: Genome-wide maps of ribosomal occupancy provide insights into adaptive evolution and regulatory roles of uORFs during Drosophila development
Source: PubMed Central journal article supplement (PMC6070289; doi:10.1371/journal.pbio.2003903), 2018-07-20
Supplement: pbio.2003903.s038.pdf [file pbio.2003903.s038.pdf]

## GDL

$P = 2.2 \times 10^{-5}$  (paired *t*-test)

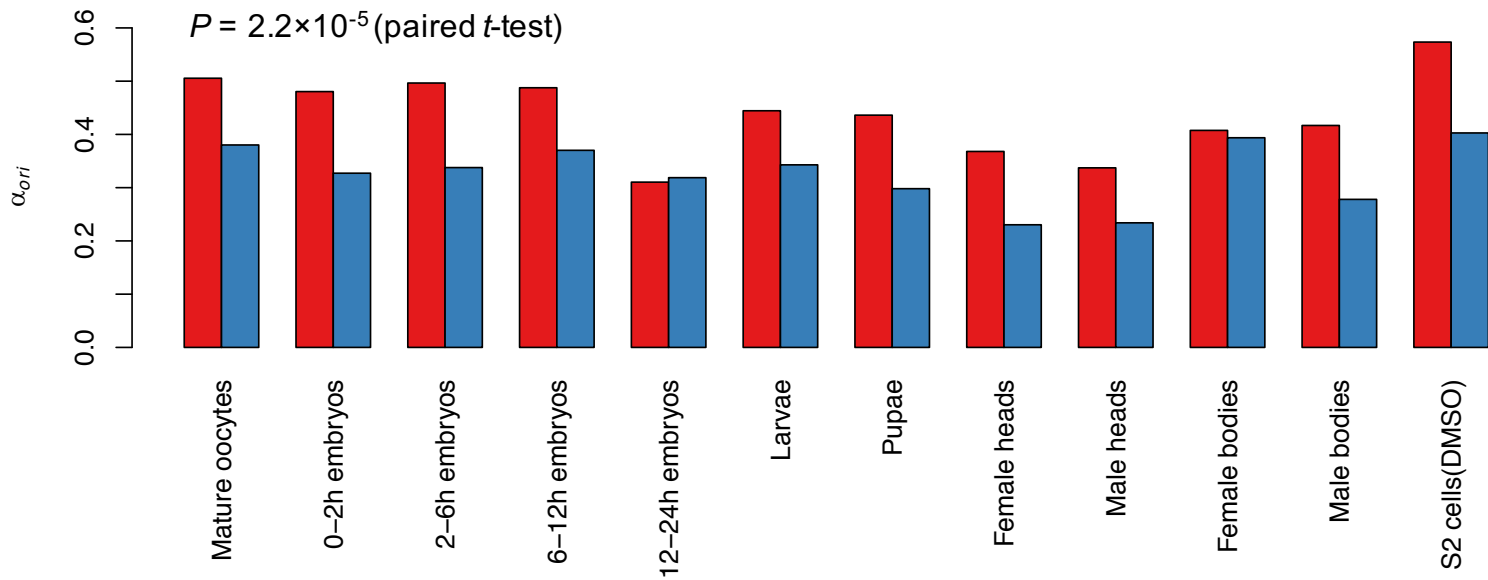

## DGRP

$P = 9.0 \times 10^{-5}$  (paired *t*-test)

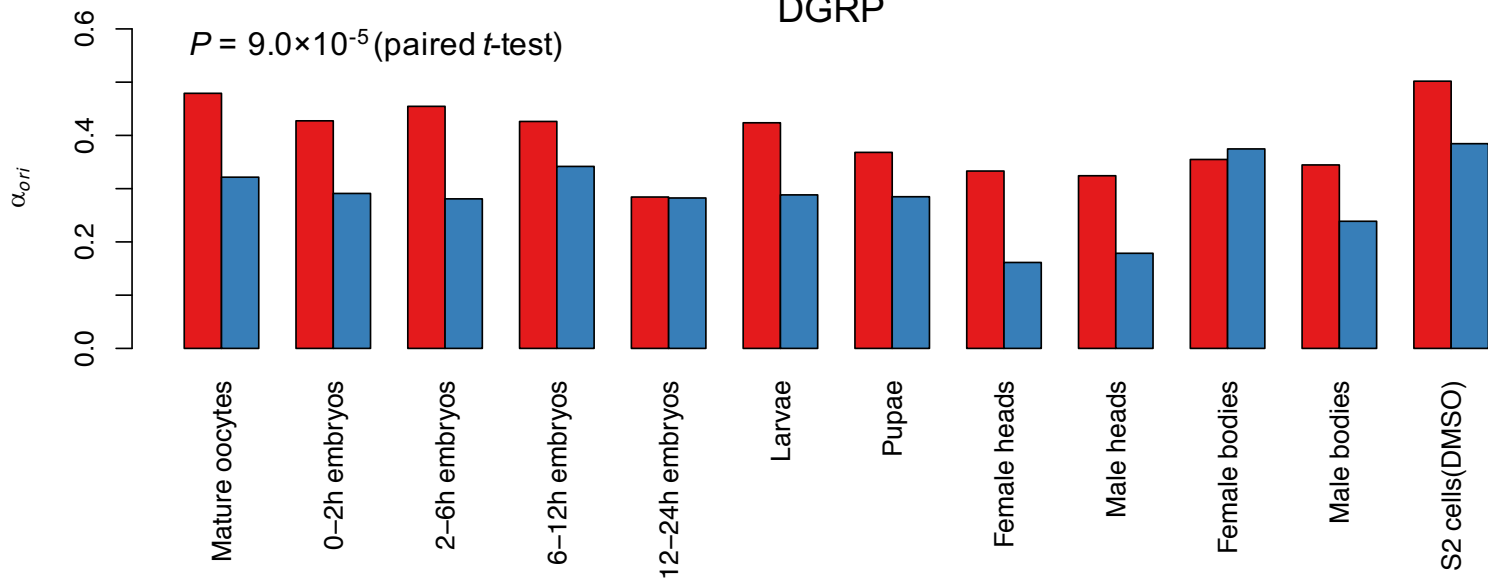

High TE<sub>uORF</sub>

Low TE<sub>uORF</sub>
