# Supplementary material for: Genome-wide maps of ribosomal occupancy provide insights into adaptive evolution and regulatory roles of uORFs during Drosophila development
Source: PubMed Central journal article supplement (PMC6070289; doi:10.1371/journal.pbio.2003903), 2018-07-20
Supplement: pbio.2003903.s046.pdf [file pbio.2003903.s046.pdf]

Mature oocytes

 $\rho = 0.559, P < 10^{-307}$ 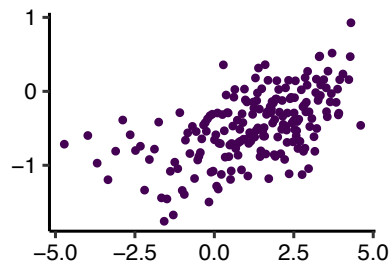

0–2h embryos

 $\rho = 0.327, P = 2.81 \times 10^{-6}$ 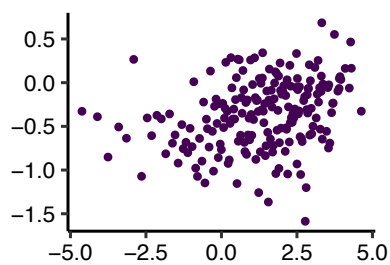

2–6h embryos

 $\rho = 0.568, P < 10^{-307}$ 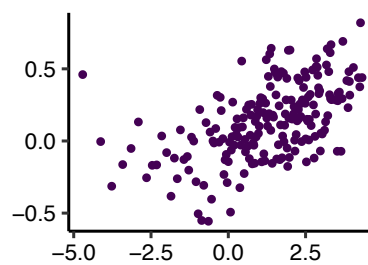

6–12h embryos

 $\rho = 0.572, P < 10^{-307}$ 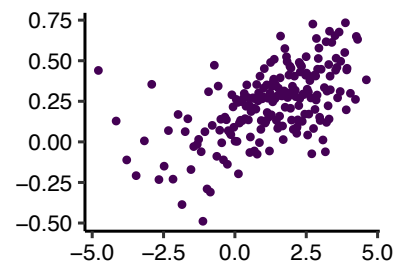

12–24h embryos

 $\rho = 0.750, P < 10^{-307}$ 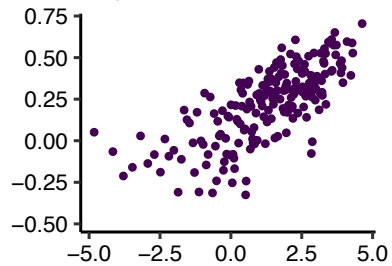

Larvae

 $\rho = 0.796, P < 10^{-307}$ 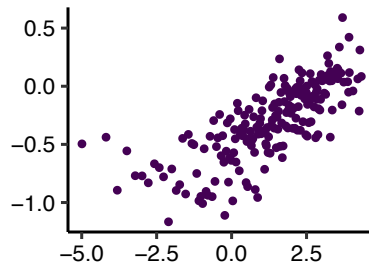

Pupae

 $\rho = 0.727, P < 10^{-307}$ 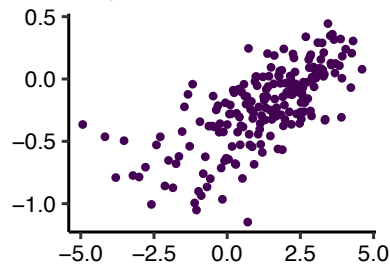

Female heads

 $\rho = 0.771, P < 10^{-307}$ 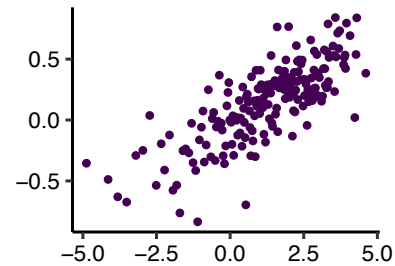

Male heads

 $\rho = 0.741, P < 10^{-307}$ 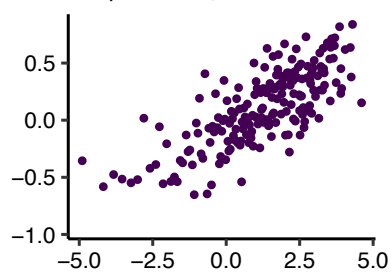

Female bodies

 $\rho = 0.699, P < 10^{-307}$ 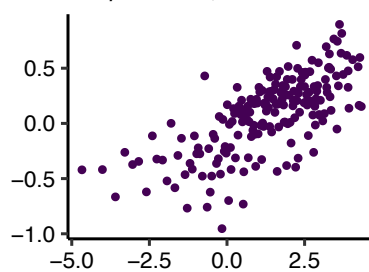

Male bodies

 $\rho = 0.769, P < 10^{-307}$ 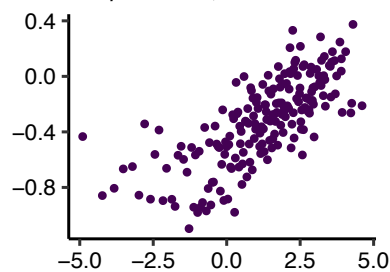

S2 cells(DMSO)

 $\rho = 0.563, P < 10^{-307}$ 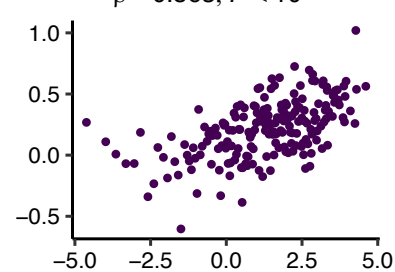

Kozak score of cAUGs

 $\log_2(\text{TE}_{\text{CDS}})$
