# Supplementary material for: Genome-wide maps of ribosomal occupancy provide insights into adaptive evolution and regulatory roles of uORFs during Drosophila development
Source: PubMed Central journal article supplement (PMC6070289; doi:10.1371/journal.pbio.2003903), 2018-07-20

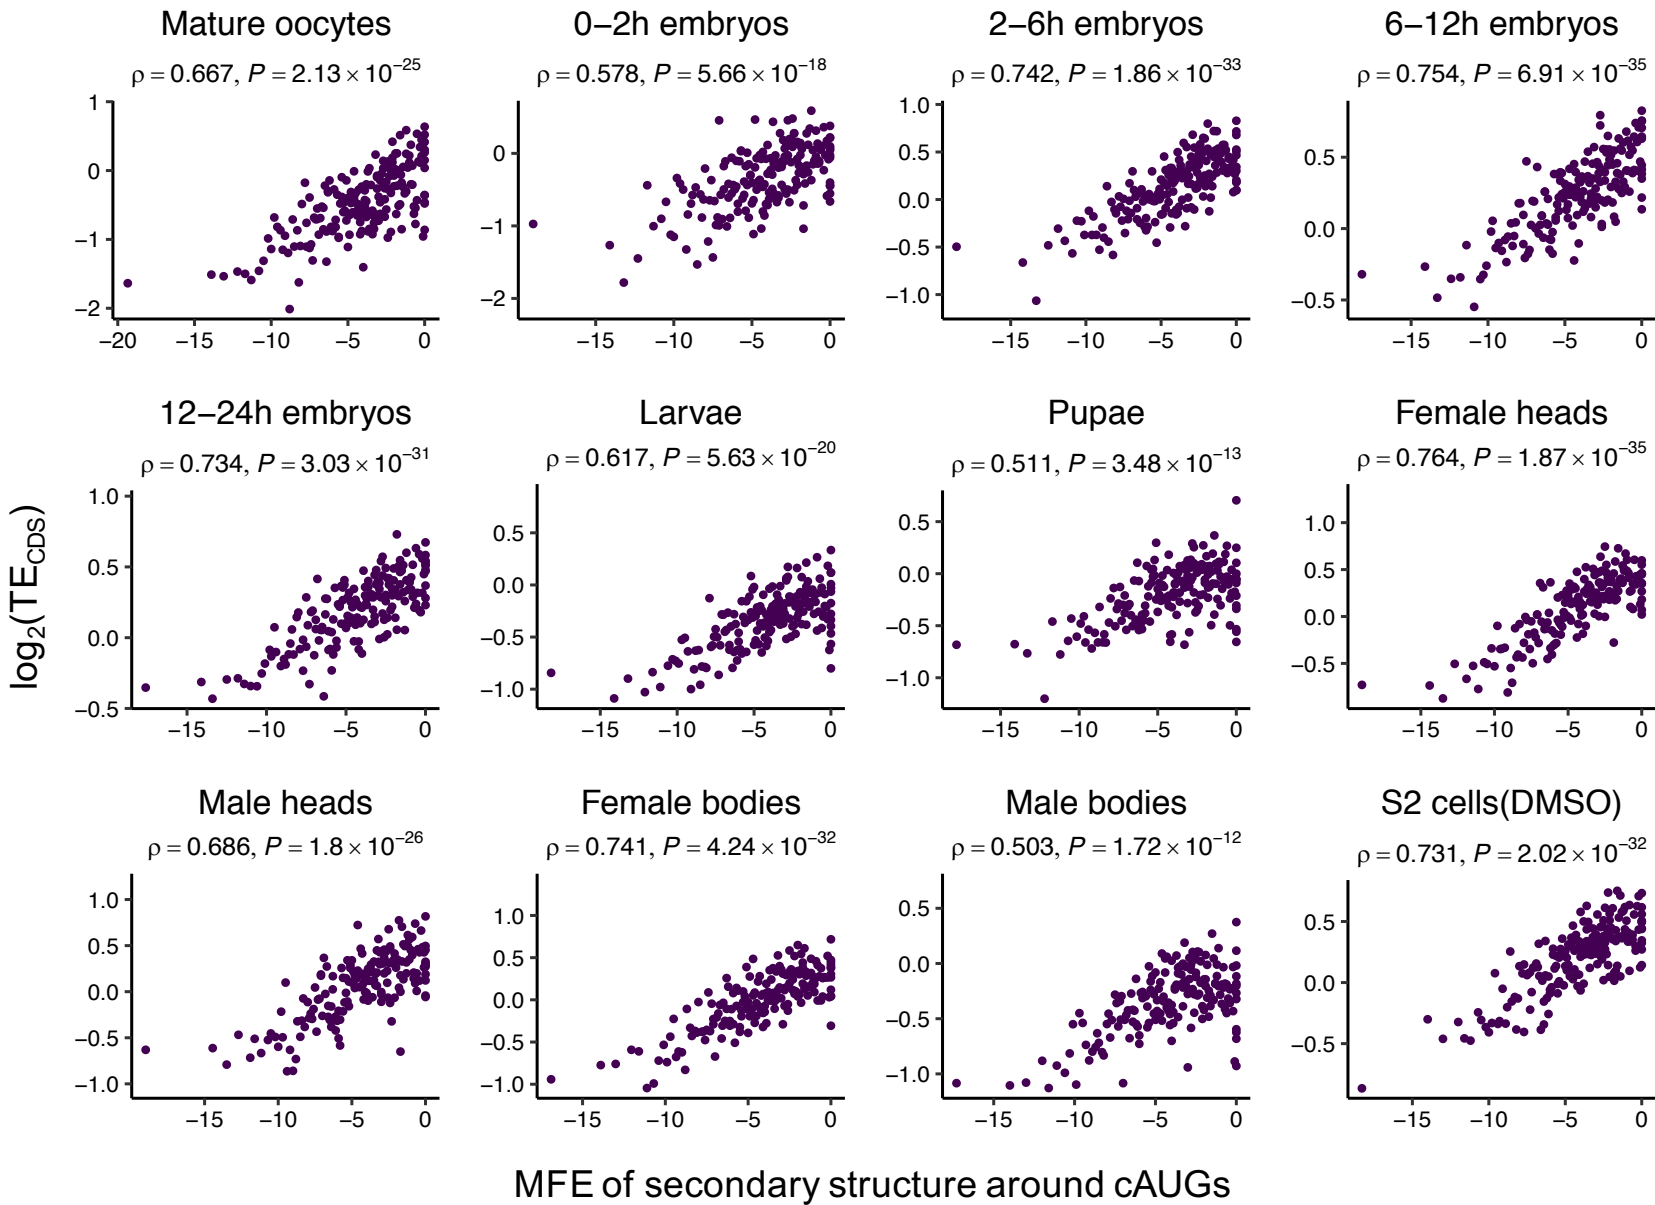

Supplement: pbio.2003903.s047.pdf [file pbio.2003903.s047.pdf]
