# Supplementary material for: Genome-wide maps of ribosomal occupancy provide insights into adaptive evolution and regulatory roles of uORFs during Drosophila development
Source: PubMed Central journal article supplement (PMC6070289; doi:10.1371/journal.pbio.2003903), 2018-07-20
Supplement: pbio.2003903.s054.pdf [file pbio.2003903.s054.pdf]

Mature oocytes

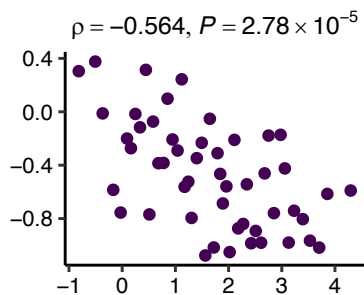

0–2h embryos

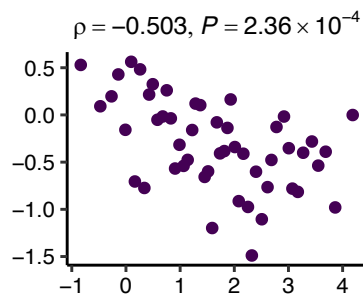

2–6h embryos

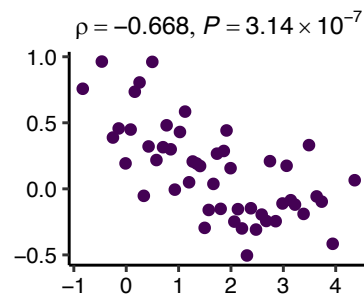

6–12h embryos

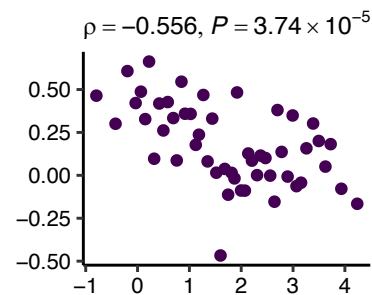

12–24h embryos

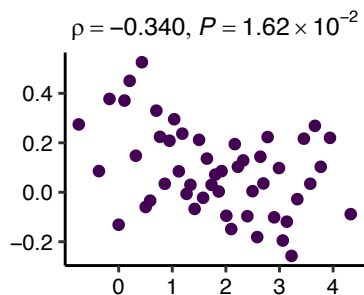

Larvae

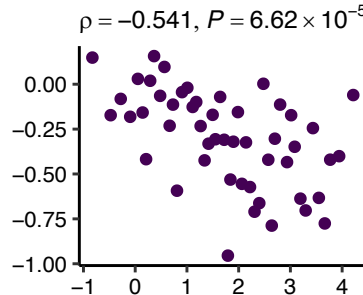

Pupae

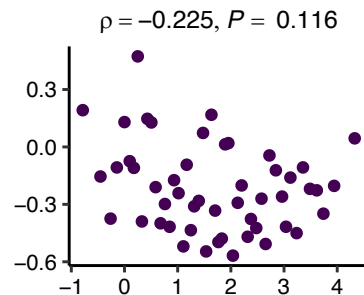

Female heads

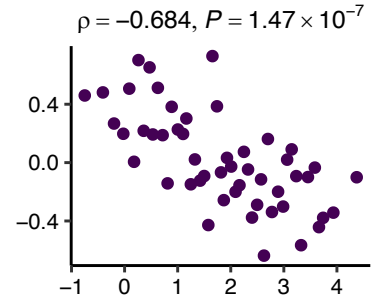

Male heads

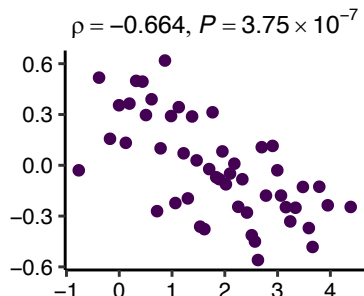

Female bodies

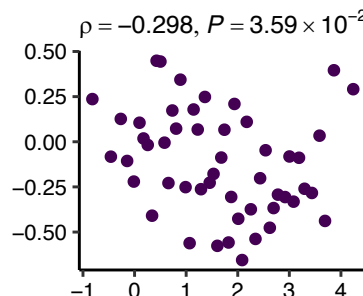

Male bodies

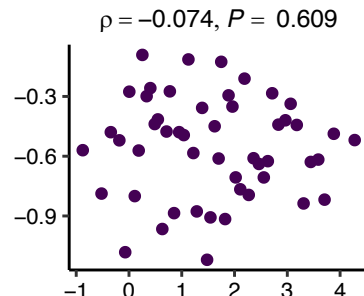

S2 cells(DMSO)

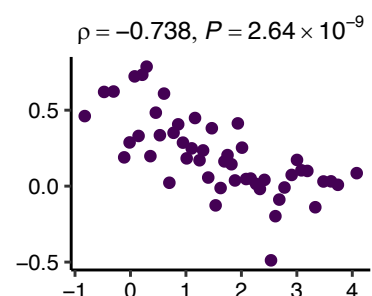

$\log_2(\text{TE}_{\text{CDS}})$

PhyloP score of uAUGs
