# Supplementary material for: Genome-wide maps of ribosomal occupancy provide insights into adaptive evolution and regulatory roles of uORFs during Drosophila development
Source: PubMed Central journal article supplement (PMC6070289; doi:10.1371/journal.pbio.2003903), 2018-07-20
Supplement: pbio.2003903.s056.pdf [file pbio.2003903.s056.pdf]

Mature oocytes

$\rho = 0.105, P = 0.478$

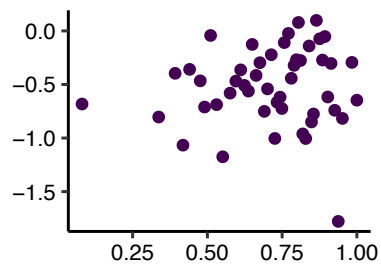

0-2h embryos

$\rho = -0.229, P = 0.118$

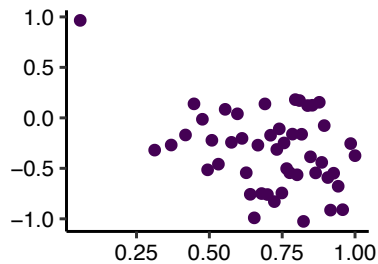

2-6h embryos

$\rho = -0.390, P = 6.4 \times 10^{-3}$

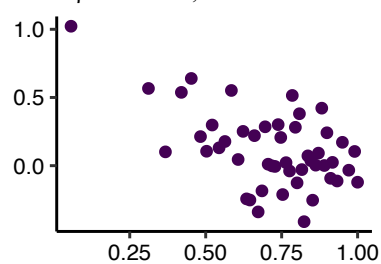

6-12h embryos

$\rho = 0.097, P = 0.506$

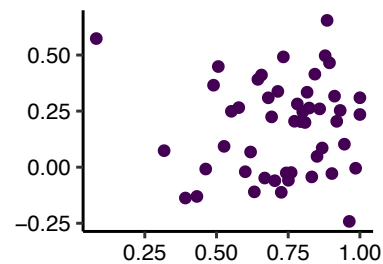

12-24h embryos

$\rho = 0.360, P = 1.23 \times 10^{-2}$

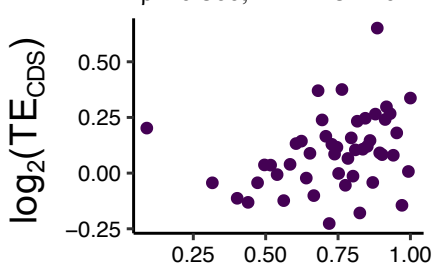

Larvae

$\rho = -0.100, P = 0.496$

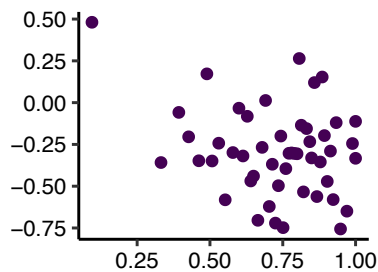

Pupae

$\rho = 0.135, P = 0.358$

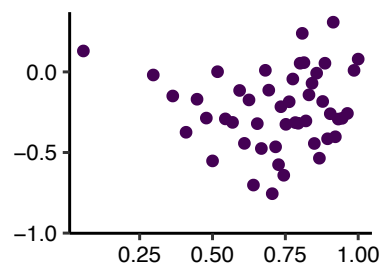

Female heads

$\rho = -0.172, P = 0.236$

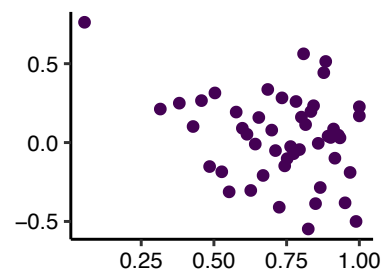

Male heads

$\rho = -0.067, P = 0.648$

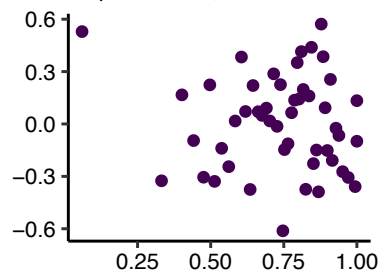

Female bodies

$\rho = 0.354, P = 1.27 \times 10^{-2}$

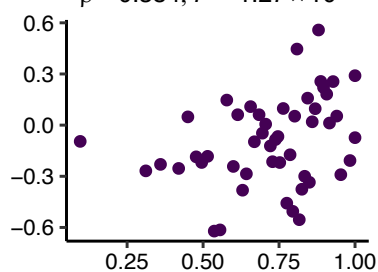

Male bodies

$\rho = 0.505, P = 3.06 \times 10^{-4}$

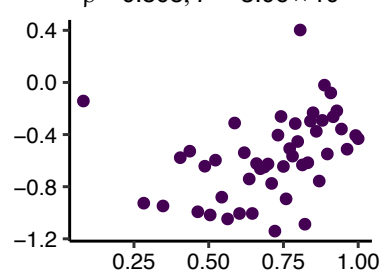

S2 cells(DMSO)

$\rho = -0.304, P = 3.61 \times 10^{-2}$

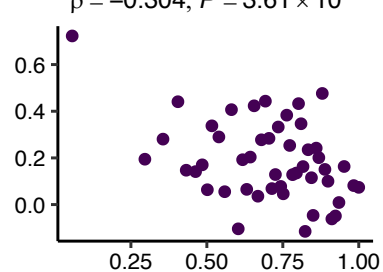

BLS of uORFs
