# Supplementary material for: Genome-wide maps of ribosomal occupancy provide insights into adaptive evolution and regulatory roles of uORFs during Drosophila development
Source: PubMed Central journal article supplement (PMC6070289; doi:10.1371/journal.pbio.2003903), 2018-07-20
Supplement: pbio.2003903.s058.pdf [file pbio.2003903.s058.pdf]

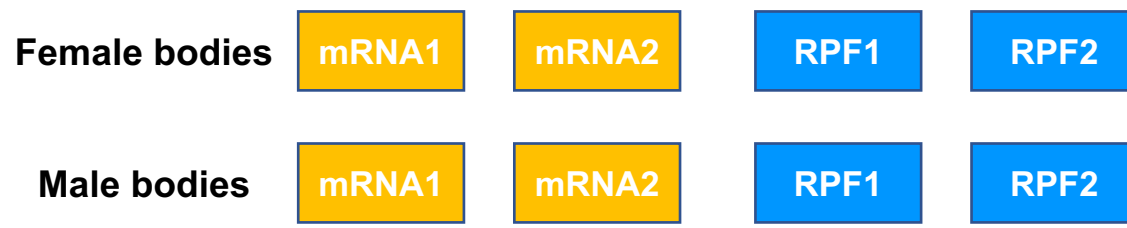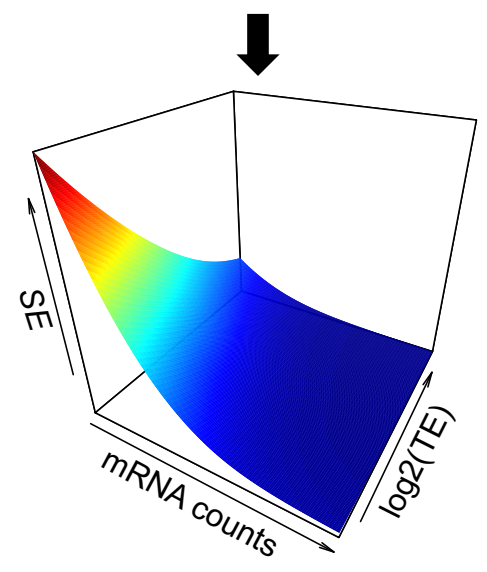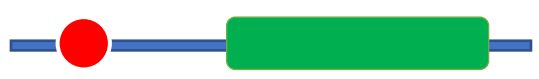

Sample 1

$$TE_{uORF,1} = \frac{RPF_{uORF,1}}{mRNA_{uORF,1}} \quad TE_{CDS,1} = \frac{RPF_{CDS,1}}{mRNA_{CDS,1}}$$

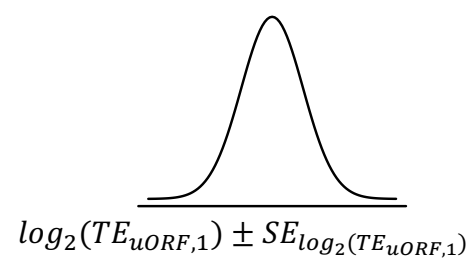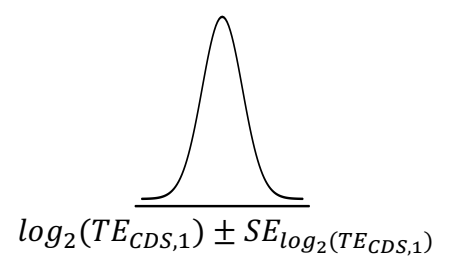

$$\gamma = \frac{TE_{CDS,2}}{TE_{CDS,1}} \cdot \frac{TE_{uORF,1}}{TE_{uORF,2}}$$

Sample 2

$$TE_{uORF,2} = \frac{RPF_{uORF,2}}{mRNA_{uORF,2}} \quad TE_{CDS,2} = \frac{RPF_{CDS,2}}{mRNA_{CDS,2}}$$

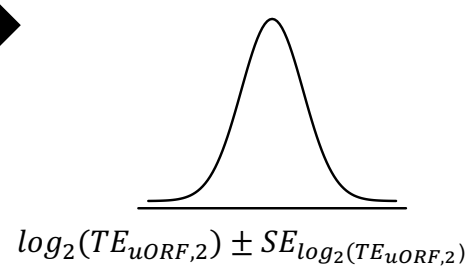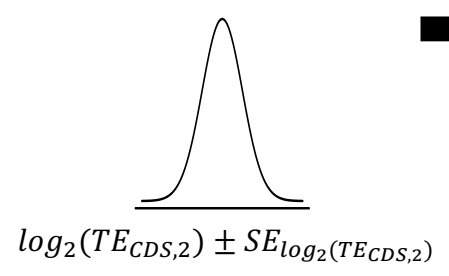

$$SE_{\log_2(\gamma)} = \frac{SE_{\log_2(\gamma)}}{\sqrt{SE_{\log_2(TE_{uORF,1})}^2 + SE_{\log_2(TE_{CDS,1})}^2 + SE_{\log_2(TE_{uORF,2})}^2 + SE_{\log_2(TE_{CDS,2})}^2}}$$

$$P(\gamma \neq 1) = 2 \cdot \left( 1 - \Phi \left( \left| \frac{\log_2(\gamma)}{SE_{\log_2(\gamma)}} \right| \right) \right)$$

|                                      |                                         |                                    |                                   |                              |
|--------------------------------------|-----------------------------------------|------------------------------------|-----------------------------------|------------------------------|
| $TE_{uORF,1} = \frac{40}{100} = 0.4$ | $TE_{CDS,1} = \frac{800}{1000} = 0.8$   | $SE_{\log_2(TE_{uORF,1})} = 0.382$ | $SE_{\log_2(TE_{CDS,1})} = 0.164$ | $\gamma = 0.31$              |
| $TE_{uORF,2} = \frac{240}{120} = 2$  | $TE_{CDS,2} = \frac{1500}{1200} = 1.25$ | $SE_{\log_2(TE_{uORF,2})} = 0.255$ | $SE_{\log_2(TE_{CDS,2})} = 0.156$ | $SE_{\log_2(\gamma)} = 0.51$ |
|                                      |                                         |                                    |                                   | $P(\gamma \neq 1) = 0.001$   |
