# Supplementary material for: Genome-wide maps of ribosomal occupancy provide insights into adaptive evolution and regulatory roles of uORFs during Drosophila development
Source: PLoS Biol. 2018 Jul 20;16(7):e2003903. doi: 10.1371/journal.pbio.2003903 (PMC6070289; doi:10.1371/journal.pbio.2003903)
Supplement: S4 Data — (XLSX) [file pbio.2003903.s070.xlsx]

## Sheet: Mature oocytes
Gene	Major_isoform	TE_CDS	Num_uORF(TE_uORF>0)	Num_uORF(TE_uORF>=0.1)	Num_uORF(TE_uORF>=0.5)	UTR5_GC_content	MFE_cAUG	cAUG_Kozak_score	UTR5_length	MFE_CAP	Num_stable_hairpin
FBgn0000008	FBtr0100521	0.1399	1	1	1	0.3913	-2.30	-2.5050	368	-6.60	0
FBgn0000017	FBtr0075357	0.2221	4	4	4	0.4547	-4.00	-0.9316	739	-8.00	0
FBgn0000018	FBtr0080168	0.0980	0	0	0	0.4691	-9.80	2.2201	81	-6.10	0
FBgn0000032	FBtr0085609	1.2786	1	1	1	0.4225	-12.00	2.9887	187	-3.70	0
FBgn0000042	FBtr0100662	3.7836	0	0	0	0.3727	-0.10	3.6509	161	-5.10	0
FBgn0000043	FBtr0086029	9.1947	0	0	0	0.3630	0.00	3.6509	135	-3.70	0
FBgn0000052	FBtr0079219	0.4758	0	0	0	0.4819	-3.30	1.7730	83	-3.50	0
FBgn0000053	FBtr0339663	0.9228	0	0	0	0.4611	-9.20	-0.7943	193	-7.10	0
FBgn0000054	FBtr0086113	1.4893	0	0	0	0.4382	0.00	-1.1867	178	-6.20	0
FBgn0000055	FBtr0100589	1.0408	1	1	1	0.4062	-1.40	2.0900	128	-5.00	0
FBgn0000057	FBtr0340288	0.1603	3	3	3	0.4643	-2.90	0.4081	140	-9.00	0
FBgn0000063	FBtr0083478	1.1402	0	0	0	0.3300	-3.10	2.4087	100	-0.60	0
FBgn0000064	FBtr0339614	3.5305	1	1	1	0.5560	-6.00	3.5279	277	-10.40	0
FBgn0000077	FBtr0307281	0.3052	0	0	0	0.3906	-3.00	4.3002	64	-2.90	0
FBgn0000083	FBtr0089519	4.5162	0	0	0	0.3623	0.00	4.3264	69	-2.70	0
FBgn0000084	FBtr0070025	4.5191	0	0	0	0.4701	-4.70	2.0633	134	-8.40	0
FBgn0000097	FBtr0077850	0.5360	4	4	4	0.4645	-6.10	-3.0429	999	-12.40	1
FBgn0000100	FBtr0078481	0.1611	0	0	0	0.4118	-0.10	3.2504	85	-4.00	0
FBgn0000109	FBtr0346440	1.0950	1	1	1	0.3738	0.00	3.5941	107	-7.30	0
FBgn0000114	FBtr0331646	0.1076	0	0	0	0.3356	-4.70	-2.8488	298	-3.10	0
FBgn0000115	FBtr0075517	1.8668	0	0	0	0.3803	-4.10	1.3583	142	-0.50	0
FBgn0000116	FBtr0345030	0.5154	0	0	0	0.5000	NA	2.5981	10	NA	NA
FBgn0000117	FBtr0089991	0.7081	0	0	0	0.4088	-11.10	3.1367	159	-2.30	0
FBgn0000119	FBtr0087702	0.3207	2	2	2	0.4607	-2.70	2.0370	191	-6.60	0
FBgn0000139	FBtr0084660	1.6173	1	1	1	0.4712	-2.30	0.9217	104	-7.70	0
FBgn0000140	FBtr0084692	0.9578	1	1	1	0.4062	-0.10	-0.1598	192	-6.80	0
FBgn0000146	FBtr0080165	1.3510	0	0	0	0.4054	-3.60	-0.2087	111	-5.80	0
FBgn0000147	FBtr0082483	1.8029	1	1	1	0.4583	-1.00	-0.2291	168	-0.80	0
FBgn0000150	FBtr0346611	2.7784	0	0	0	0.4333	NA	1.9042	30	NA	NA
FBgn0000152	FBtr0074372	1.6086	6	6	6	0.4044	-7.20	1.1882	455	-2.10	0
FBgn0000158	FBtr0084869	0.8041	0	0	0	0.3210	-4.20	1.1258	81	-2.00	0
FBgn0000163	FBtr0074388	0.3154	8	8	6	0.4034	-4.80	2.5009	1066	-8.80	0
FBgn0000166	FBtr0081665	0.0316	1	1	1	0.4769	-6.60	2.4972	195	-4.50	0
FBgn0000173	FBtr0300566	3.1403	0	0	0	0.4449	-4.20	1.1882	245	-1.60	0
FBgn0000181	FBtr0087782	1.1275	0	0	0	0.4146	-5.20	4.3264	82	-2.10	0
FBgn0000182	FBtr0080804	0.4073	2	2	2	0.4536	-4.60	2.7507	560	-8.90	0
FBgn0000183	FBtr0081002	0.6575	3	3	3	0.4646	-1.60	1.5572	891	-3.00	0
FBgn0000212	FBtr0075525	0.5175	0	0	0	0.4252	-2.20	1.9617	127	-4.50	0
FBgn0000221	FBtr0070638	0.6409	0	0	0	0.3472	-4.30	0.3101	144	-2.10	0
FBgn0000228	FBtr0079084	0.1372	2	2	2	0.4680	-7.80	0.2883	359	-12.00	0
FBgn0000229	FBtr0080087	0.9747	5	5	5	0.3111	-1.50	2.2730	270	-5.20	0
FBgn0000239	FBtr0343875	0.3460	0	0	0	0.5027	-8.30	2.5228	372	-6.00	0
FBgn0000244	FBtr0082119	6.5968	0	0	0	0.3704	NA	1.9659	27	NA	NA
FBgn0000246	FBtr0083195	0.5133	0	0	0	0.4478	-7.90	3.5878	67	-7.90	0
FBgn0000247	FBtr0085484	0.6760	0	0	0	0.5172	-5.60	0.7776	524	-3.90	0
FBgn0000250	FBtr0080845	0.8103	1	1	1	0.4151	-1.80	2.2503	159	-6.70	0
FBgn0000251	FBtr0081413	0.4473	1	1	1	0.4065	-3.20	3.9037	214	-4.50	0
FBgn0000253	FBtr0345018	4.7558	0	0	0	0.3961	0.00	4.2544	154	-7.90	0
FBgn0000256	FBtr0077513	0.5468	4	4	4	0.4951	-13.80	-2.1048	511	-5.10	0
FBgn0000257	FBtr0074728	0.2537	0	0	0	0.5849	-4.30	-0.4357	159	-6.60	0
FBgn0000259	FBtr0073560	2.1836	2	2	2	0.4173	-0.30	4.3264	405	-10.40	0
FBgn0000261	FBtr0075058	8.9725	0	0	0	0.4121	-2.10	4.2987	182	-5.60	0
FBgn0000273	FBtr0079851	2.1636	2	2	2	0.5106	-6.30	3.0691	850	-4.00	1
FBgn0000276	FBtr0085612	6.8847	0	0	0	0.3649	-0.70	2.7001	74	-2.20	0
FBgn0000283	FBtr0083126	0.0838	3	3	3	0.4906	-6.20	2.3587	212	-6.90	0
FBgn0000286	FBtr0089647	0.1358	1	1	1	0.4140	-7.00	1.1854	343	-7.30	0
FBgn0000289	FBtr0087529	0.6854	3	3	3	0.4281	-1.00	1.4373	577	-2.30	0
FBgn0000307	FBtr0080839	0.5629	7	7	7	0.4216	-4.20	-2.4828	721	-7.10	0
FBgn0000308	FBtr0309213	2.3521	0	0	0	0.4969	0.00	2.3430	324	-4.90	0
FBgn0000316	FBtr0070065	0.5581	0	0	0	0.3250	-6.50	1.3890	120	-2.50	0
FBgn0000317	FBtr0080724	0.0824	2	2	2	0.4769	-4.90	2.5073	281	-6.80	0
FBgn0000318	FBtr0079095	1.3617	0	0	0	0.4894	-4.90	0.6453	141	-6.90	0
FBgn0000319	FBtr0112798	2.5063	1	1	1	0.3543	-8.10	2.4061	254	-0.70	0
FBgn0000326	FBtr0071687	1.0245	0	0	0	0.4112	-9.70	2.3754	107	-6.50	0
FBgn0000330	FBtr0332315	1.9347	0	0	0	0.3148	-2.70	-0.9364	54	-3.10	0
FBgn0000339	FBtr0337082	1.8220	0	0	0	0.4419	-5.60	3.0454	86	-2.40	0
FBgn0000346	FBtr0073754	1.4463	0	0	0	0.2933	0.00	2.8522	225	-3.90	0
FBgn0000351	FBtr0333350	1.2945	1	1	1	0.2353	NA	-2.2587	17	NA	NA
FBgn0000352	FBtr0089015	0.2984	1	1	1	0.4632	-6.30	3.0033	136	-6.50	0
FBgn0000355	FBtr0076572	13.1031	0	0	0	0.3913	-1.80	1.9480	46	-4.00	0
FBgn0000356	FBtr0076574	16.3567	0	0	0	0.4043	-0.40	3.6728	47	-0.40	0
FBgn0000357	FBtr0076571	20.5265	0	0	0	0.4318	-2.20	1.5202	44	-2.90	0
FBgn0000358	FBtr0076573	31.5594	0	0	0	0.4186	-1.30	0.9463	43	-1.30	0
FBgn0000359	FBtr0071203	29.3691	0	0	0	0.5526	NA	2.2555	38	NA	NA
FBgn0000360	FBtr0300448	118.8641	0	0	0	0.5584	-6.60	2.7315	77	-4.00	0
FBgn0000370	FBtr0081512	1.2639	4	4	4	0.3841	-1.10	-0.8348	289	-2.90	0
FBgn0000376	FBtr0070495	0.1041	2	2	1	0.4511	-8.70	3.5458	133	-6.20	0
FBgn0000377	FBtr0070418	0.9714	0	0	0	0.4167	-5.30	1.0974	120	-1.80	0
FBgn0000382	FBtr0070380	1.1737	4	4	4	0.5258	-8.10	-1.8002	194	-2.90	0
FBgn0000384	FBtr0334157	0.1309	8	8	8	0.3770	-8.30	-0.5216	382	-1.40	0
FBgn0000392	FBtr0290322	3.6794	4	4	4	0.3626	-6.80	-2.7534	182	-2.90	0
FBgn0000394	FBtr0070804	0.8291	1	1	1	0.4811	-3.00	-0.0831	607	-2.30	0
FBgn0000404	FBtr0304650	0.1334	6	6	6	0.4392	-2.10	1.9203	510	-4.90	0
FBgn0000405	FBtr0071911	0.5961	0	0	0	0.4045	-1.70	4.6558	267	-4.10	0
FBgn0000409	FBtr0344849	0.9796	0	0	0	0.3333	NA	2.3942	39	NA	NA
FBgn0000412	FBtr0081988	0.5959	0	0	0	0.4261	-0.60	2.5449	230	-3.90	0
FBgn0000414	FBtr0305086	0.0247	8	8	5	0.4529	-7.60	2.4691	552	-4.90	0
FBgn0000416	FBtr0085713	7.0695	0	0	0	0.3643	-2.50	2.4972	129	-2.70	0
FBgn0000426	FBtr0088010	1.3905	0	0	0	0.3884	0.00	1.9938	121	-11.80	0
FBgn0000427	FBtr0071147	22.8053	0	0	0	0.5067	-1.60	0.6618	75	-6.80	0
FBgn0000447	FBtr0081890	1.4386	0	0	0	0.6667	NA	0.3550	15	NA	NA
FBgn0000454	FBtr0345229	8.1642	0	0	0	0.5556	-4.90	1.3630	63	-8.40	0
FBgn0000455	FBtr0082597	1.0235	0	0	0	0.4244	-2.70	2.9796	172	-3.30	0
FBgn0000463	FBtr0083739	0.1974	6	6	6	0.4124	0.00	2.6189	679	-5.30	0
FBgn0000464	FBtr0081260	0.4006	0	0	0	0.3675	-4.20	2.0108	117	0.00	0
FBgn0000479	FBtr0333313	0.0754	6	6	6	0.4433	-11.40	-2.7313	1622	-3.60	1
FBgn0000482	FBtr0070269	0.7268	0	0	0	0.4648	-1.20	2.2446	71	-10.00	0
FBgn0000489	FBtr0075529	10.3240	0	0	0	0.4156	-5.00	0.2304	972	-5.40	0
FBgn0000499	FBtr0073454	0.3244	2	2	2	0.4799	-7.40	2.8427	473	-6.30	0
FBgn0000520	FBtr0070487	0.2783	0	0	0	0.4328	-8.00	1.3543	134	-1.70	0
FBgn0000524	FBtr0070914	0.0641	4	4	2	0.4638	-3.10	1.1761	414	-1.60	0
FBgn0000533	FBtr0083083	0.1441	0	0	0	0.4902	-8.60	2.2503	204	-7.60	0
FBgn0000536	FBtr0074212	0.6023	0	0	0	0.4427	-1.50	1.1173	192	-8.50	0
FBgn0000541	FBtr0332104	0.3777	3	3	3	0.4478	-2.70	3.1130	134	-4.60	0
FBgn0000543	FBtr0072903	1.2290	1	1	1	0.4756	-0.10	-0.0684	82	-4.80	0
FBgn0000546	FBtr0086009	0.3243	4	4	4	0.4060	-8.10	-0.7347	468	-8.60	0
FBgn0000547	FBtr0334265	1.0657	1	1	1	0.3866	-0.80	3.5245	432	-8.10	0
FBgn0000556	FBtr0331927	0.8680	0	0	0	0.2667	-2.70	3.5302	90	-4.70	0
FBgn0000559	FBtr0332966	0.3987	0	0	0	0.4667	-5.20	4.2326	75	-8.10	0
FBgn0000562	FBtr0343272	1.0511	0	0	0	0.5176	-2.00	1.1998	199	-9.70	0
FBgn0000565	FBtr0330176	0.6297	0	0	0	0.3151	-2.20	1.5390	146	-6.20	0
FBgn0000566	FBtr0345422	1.4353	0	0	0	0.5195	-0.90	2.7315	77	-4.50	0
FBgn0000568	FBtr0075150	1.5589	3	3	3	0.4774	-0.50	1.9174	530	-5.60	0
FBgn0000575	FBtr0072578	4.4461	0	0	0	0.4356	-2.90	1.8490	264	-6.20	0
FBgn0000578	FBtr0340450	0.4668	2	2	1	0.4864	-5.00	0.6185	405	-7.80	0
FBgn0000579	FBtr0077909	2.3129	0	0	0	0.4353	-6.40	1.7345	85	-5.10	0
FBgn0000581	FBtr0088140	0.0570	9	9	8	0.5058	0.00	2.5773	1036	-6.60	1
FBgn0000588	FBtr0080325	0.1961	0	0	0	0.4176	-7.70	2.5508	170	-8.50	0
FBgn0000611	FBtr0333323	1.3973	2	2	2	0.4140	-6.20	2.2909	215	-4.00	0
FBgn0000615	FBtr0086243	0.1622	0	0	0	0.3404	-3.30	3.1860	141	-6.20	0
FBgn0000617	FBtr0074463	1.5860	0	0	0	0.3571	-0.70	-0.4001	98	-3.00	0
FBgn0000618	FBtr0073540	3.7847	1	1	1	0.3944	-3.90	0.7073	142	0.00	0
FBgn0000629	FBtr0273338	1.1310	0	0	0	0.3898	-0.50	-0.1906	118	-9.10	0
FBgn0000636	FBtr0112804	45.6922	2	2	2	0.4505	-0.90	1.1321	586	-2.40	0
FBgn0000662	FBtr0087647	0.6497	2	2	2	0.4541	-0.30	1.3109	425	-5.10	0
FBgn0000667	FBtr0310657	0.4375	3	3	3	0.4925	-2.20	2.3609	398	-2.90	0
FBgn0000709	FBtr0077192	0.1227	1	1	1	0.3725	-3.30	3.9449	153	-13.50	0
FBgn0000711	FBtr0333305	3.8982	0	0	0	0.4004	-5.90	3.5264	552	-3.10	0
FBgn0000719	FBtr0333180	0.9749	0	0	0	0.3727	-6.40	1.0830	110	-0.10	0
FBgn0000721	FBtr0089304	0.5058	4	4	4	0.4375	-16.10	-3.5745	624	-2.20	0
FBgn0000808	FBtr0347416	0.1121	0	0	0	0.4487	-5.90	-0.2669	78	-8.40	0
FBgn0000810	FBtr0070396	0.5139	0	0	0	0.4561	-6.00	0.1697	171	-4.80	0
FBgn0000826	FBtr0070234	0.3411	0	0	0	0.5441	-12.60	1.3617	68	-5.40	0
FBgn0000927	FBtr0070485	1.0212	2	2	2	0.4138	-7.90	-3.5935	58	-4.30	0
FBgn0000996	FBtr0339999	2.6094	0	0	0	0.3907	0.00	-0.3656	215	-4.80	0
FBgn0001078	FBtr0075086	0.1592	15	15	5	0.4231	0.00	2.4485	1326	-3.00	0
FBgn0001079	FBtr0074602	0.2076	0	0	0	0.5059	-3.60	2.3249	85	-5.50	0
FBgn0001084	FBtr0331992	0.0917	0	0	0	0.4655	-8.90	-1.1812	58	-3.40	0
FBgn0001085	FBtr0075743	0.2165	10	10	10	0.3652	-1.80	3.6746	712	-8.20	0
FBgn0001086	FBtr0080833	3.4756	1	1	1	0.3310	-2.90	3.1240	145	-3.70	0
FBgn0001087	FBtr0331709	0.3136	1	1	1	0.4332	-3.60	3.1706	217	-3.10	0
FBgn0001091	FBtr0100479	2.4982	0	0	0	0.4455	-2.40	0.2946	110	-5.60	0
FBgn0001092	FBtr0332618	3.5405	0	0	0	0.3922	-1.30	1.6993	51	-3.70	0
FBgn0001098	FBtr0089497	0.8561	0	0	0	0.5000	-4.30	0.9843	90	-11.50	0
FBgn0001099	FBtr0346516	1.0271	0	0	0	0.3986	-0.10	1.7054	138	-11.90	0
FBgn0001104	FBtr0076934	0.3321	2	2	2	0.4581	-3.30	1.6491	406	-1.80	0
FBgn0001105	FBtr0331597	1.2260	3	3	3	0.4339	-3.60	2.3609	454	-7.70	0
FBgn0001108	FBtr0075756	0.9272	1	1	1	0.4637	-4.40	1.1987	289	-6.20	0
FBgn0001120	FBtr0075697	1.7189	0	0	0	0.2970	0.00	-1.2586	101	-6.40	0
FBgn0001122	FBtr0088266	0.3437	0	0	0	0.4037	-7.60	1.9203	379	-3.40	0
FBgn0001123	FBtr0072142	3.7498	0	0	0	0.5318	-7.70	-0.6233	299	-6.50	0
FBgn0001124	FBtr0087232	0.9983	0	0	0	0.4330	-5.90	1.5871	97	-5.70	0
FBgn0001125	FBtr0077867	2.1856	0	0	0	0.3868	-4.50	1.0230	106	-6.30	0
FBgn0001128	FBtr0079146	0.6570	0	0	0	0.4483	-4.60	1.5387	145	-5.40	0
FBgn0001133	FBtr0071548	0.6534	3	3	3	0.3026	-0.50	2.5231	76	-6.80	0
FBgn0001137	FBtr0079708	0.0446	0	0	0	0.4545	-7.20	-1.8133	374	-2.80	0
FBgn0001139	FBtr0084962	0.3457	4	4	4	0.4874	-5.00	3.3457	515	-4.80	0
FBgn0001142	FBtr0078114	0.6916	0	0	0	0.4677	-3.90	3.4661	186	-6.40	0
FBgn0001149	FBtr0082607	2.8986	0	0	0	0.3429	-1.50	3.2504	70	-5.40	0
FBgn0001168	FBtr0100153	11.9499	0	0	0	0.4440	0.00	3.2511	491	-4.00	0
FBgn0001169	FBtr0083915	0.2115	1	1	1	0.4730	-3.50	3.0010	241	-10.70	0
FBgn0001179	FBtr0114599	1.3724	0	0	0	0.2727	-1.30	-0.3952	66	-3.30	0
FBgn0001180	FBtr0081950	0.1576	1	1	1	0.4854	-6.30	2.1253	515	-5.40	0
FBgn0001185	FBtr0080883	0.0527	1	1	1	0.3485	-5.20	-0.4085	198	-1.40	0
FBgn0001186	FBtr0071361	0.9550	1	1	1	0.4073	-0.50	2.4422	329	-7.80	0
FBgn0001189	FBtr0333115	0.8081	2	2	2	0.5286	-8.40	0.8770	350	-14.30	0
FBgn0001197	FBtr0085062	2.1754	0	0	0	0.4878	-1.80	2.8759	164	-1.90	0
FBgn0001202	FBtr0081180	0.3671	0	0	0	0.3729	-2.10	2.6414	118	-5.70	0
FBgn0001206	FBtr0071511	0.3260	1	1	1	0.4677	-10.50	0.7080	263	-10.30	0
FBgn0001215	FBtr0085299	0.2538	0	0	0	0.3644	-1.90	2.8802	118	-8.50	0
FBgn0001218	FBtr0073609	5.4870	0	0	0	0.3893	-7.90	1.9893	131	-8.10	0
FBgn0001220	FBtr0339969	0.6291	0	0	0	0.4493	-2.60	3.2888	138	-2.90	0
FBgn0001222	FBtr0086782	0.5108	0	0	0	0.3745	-8.10	-4.1281	243	-5.10	0
FBgn0001223	FBtr0100559	1.1190	0	0	0	0.3031	-3.10	1.3409	254	-1.00	0
FBgn0001224	FBtr0076453	6.3655	0	0	0	0.3362	-2.20	4.2544	116	-7.00	0
FBgn0001225	FBtr0076496	5.8956	0	0	0	0.3262	-1.00	3.3411	187	-5.00	0
FBgn0001226	FBtr0076454	5.0181	0	0	0	0.3089	-0.90	3.2994	123	-2.10	0
FBgn0001228	FBtr0100653	0.0000	0	0	0	0.5455	-5.70	2.3003	44	-5.70	0
FBgn0001230	FBtr0084589	1.4024	0	0	0	0.3398	-0.60	2.1253	206	-5.40	0
FBgn0001233	FBtr0073040	2.5630	0	0	0	0.3289	-2.70	2.0860	152	-3.50	0
FBgn0001247	FBtr0273273	1.7474	1	1	1	0.4393	-2.10	2.3846	346	-10.30	0
FBgn0001248	FBtr0076667	2.9400	0	0	0	0.3684	-0.80	2.6701	114	-10.20	0
FBgn0001255	FBtr0310412	0.3054	0	0	0	0.4923	-2.40	0.8335	65	-2.40	0
FBgn0001257	FBtr0333569	2.7476	4	4	4	0.5000	-0.60	2.5493	732	-6.80	0
FBgn0001276	FBtr0088154	1.8355	0	0	0	0.3718	-1.00	0.1589	78	-3.10	0
FBgn0001280	FBtr0085597	2.2622	0	0	0	0.4167	-5.80	3.2959	60	-7.80	0
FBgn0001281	FBtr0085598	0.0000	0	0	0	0.3222	-0.90	2.8711	90	-2.00	0
FBgn0001291	FBtr0088411	1.8327	0	0	0	0.3915	-4.10	2.8411	235	0.00	0
FBgn0001296	FBtr0082666	10.0589	0	0	0	0.5885	-3.90	0.8680	192	-11.40	0
FBgn0001297	FBtr0099989	1.8517	0	0	0	0.5212	-3.90	2.6195	708	-14.20	0
FBgn0001301	FBtr0081042	1.5844	0	0	0	0.5395	-5.40	-4.1070	152	-12.10	0
FBgn0001308	FBtr0087184	1.9075	2	2	2	0.4774	-0.80	0.9732	486	-4.60	0
FBgn0001316	FBtr0112808	0.1103	15	15	5	0.4135	-4.90	3.3067	1098	-7.50	0
FBgn0001324	FBtr0074884	0.5249	0	0	0	0.4355	-2.50	0.7053	62	-2.30	0
FBgn0001330	FBtr0070419	0.3434	1	1	1	0.3008	-13.90	1.3583	133	-6.60	0
FBgn0001341	FBtr0070119	0.1610	0	0	0	0.3805	0.00	2.1649	113	-3.50	0
FBgn0001404	FBtr0070439	0.1090	7	6	2	0.4742	0.00	3.1367	1493	-5.80	0
FBgn0001491	FBtr0073460	1.3464	1	1	1	0.3008	-1.30	0.7305	123	-5.10	0
FBgn0001565	FBtr0077221	0.1660	0	0	0	0.4842	-4.30	1.9218	95	-5.80	0
FBgn0001612	FBtr0073841	2.6522	3	3	3	0.4351	-10.20	0.8540	285	-4.60	0
FBgn0001624	FBtr0308088	0.4733	0	0	0	0.3171	0.00	0.2537	82	0.00	0
FBgn0001941	FBtr0079179	1.4227	1	1	1	0.4898	0.00	3.0691	147	-3.60	0
FBgn0001942	FBtr0307068	1.1061	0	0	0	0.3429	-4.40	2.4339	70	-5.90	0
FBgn0001961	FBtr0080569	0.5157	0	0	0	0.5136	-2.40	1.7901	257	-5.60	0
FBgn0001965	FBtr0080541	0.0870	1	1	1	0.5477	-8.70	1.2418	398	-7.80	1
FBgn0001970	FBtr0080629	0.3747	1	1	1	0.4141	-1.70	-2.4299	128	-9.40	0
FBgn0001974	FBtr0080696	2.3044	0	0	0	0.4177	-6.40	-0.3889	79	-2.60	0
FBgn0001977	FBtr0080725	2.0010	0	0	0	0.3837	-3.50	3.3086	86	-1.20	0
FBgn0001978	FBtr0080706	0.4299	2	2	2	0.5098	-6.10	-0.6659	410	-7.90	0
FBgn0001986	FBtr0080760	0.5432	1	1	1	0.4149	-1.30	-0.3014	94	-5.40	0
FBgn0001987	FBtr0080768	8.6024	0	0	0	0.5526	-9.20	1.7857	76	-10.30	0
FBgn0001989	FBtr0343722	1.7707	0	0	0	0.4020	-0.90	4.2326	102	-4.50	0
FBgn0001990	FBtr0331282	0.6180	0	0	0	0.4492	-6.30	0.8787	118	-5.40	0
FBgn0001994	FBtr0080854	0.5266	5	5	5	0.4510	-1.40	2.6232	541	-6.90	0
FBgn0001995	FBtr0080843	1.5752	0	0	0	0.4400	-0.70	2.3354	50	-0.90	0
FBgn0002021	FBtr0081177	0.3241	1	1	1	0.2368	0.00	2.6426	114	-4.40	0
FBgn0002022	FBtr0081143	5.5496	0	0	0	0.4405	-8.90	4.2244	84	-0.40	0
FBgn0002031	FBtr0081164	2.2590	0	0	0	0.3333	0.00	1.3476	117	-4.10	0
FBgn0002036	FBtr0081155	0.0739	1	1	1	0.3826	-4.30	-1.4659	379	-1.00	0
FBgn0002044	FBtr0081245	0.3113	0	0	0	0.4532	-2.20	-0.5876	331	-6.40	0
FBgn0002069	FBtr0339391	1.3174	0	0	0	0.4250	NA	3.0691	40	NA	0
FBgn0002121	FBtr0078169	0.7951	6	6	6	0.4142	-4.70	-2.9609	367	-3.00	0
FBgn0002174	FBtr0089504	0.4376	4	4	3	0.3699	-0.20	3.2125	73	-10.00	0
FBgn0002183	FBtr0072865	0.8708	1	1	1	0.4478	-4.50	1.4193	134	-1.20	0
FBgn0002283	FBtr0307336	0.1207	1	1	1	0.4881	-1.80	1.4916	295	-3.20	0
FBgn0002284	FBtr0075360	3.1288	0	0	0	0.3600	-2.60	2.4469	100	-6.60	0
FBgn0002354	FBtr0082703	0.9736	0	0	0	0.3623	-8.50	1.1452	69	-3.80	0
FBgn0002413	FBtr0085743	0.1199	4	4	4	0.4419	0.00	4.6059	396	-8.70	0
FBgn0002431	FBtr0082090	0.7822	2	2	2	0.3778	-3.80	3.2504	90	-5.30	0
FBgn0002441	FBtr0085175	0.5119	4	4	4	0.3977	-1.10	2.9444	787	-2.60	0
FBgn0002466	FBtr0075970	0.0918	1	1	1	0.4189	-1.80	0.7325	148	-8.30	0
FBgn0002521	FBtr0089205	0.5692	3	3	3	0.3297	-2.20	1.9591	182	-2.60	0
FBgn0002524	FBtr0080738	0.2484	0	0	0	0.3936	-7.50	1.7036	94	-1.20	0
FBgn0002525	FBtr0079100	1.8920	0	0	0	0.4206	-1.80	1.5940	126	-0.10	0
FBgn0002542	FBtr0081758	1.1915	1	1	1	0.3469	-4.40	2.9706	98	-4.70	0
FBgn0002552	FBtr0088651	0.0462	3	3	3	0.5135	-10.10	-1.0910	520	-11.50	0
FBgn0002566	FBtr0111125	0.8723	0	0	0	0.2574	-2.90	-1.1473	101	-4.00	0
FBgn0002567	FBtr0339369	0.8528	0	0	0	0.5797	-6.40	1.3780	69	-7.70	0
FBgn0002579	FBtr0345321	0.6423	0	0	0	0.3810	NA	2.8689	21	NA	NA
FBgn0002590	FBtr0345132	0.3678	0	0	0	0.5714	NA	1.1452	7	NA	NA
FBgn0002593	FBtr0331932	0.0991	0	0	0	0.4390	-6.20	1.6199	123	-5.70	0
FBgn0002607	FBtr0072406	0.5329	0	0	0	0.5000	NA	1.1385	36	NA	NA
FBgn0002622	FBtr0346349	0.8660	0	0	0	0.4884	-2.80	3.9449	43	-2.80	0
FBgn0002626	FBtr0085592	0.5135	0	0	0	0.4571	NA	2.7658	35	NA	NA
FBgn0002638	FBtr0077076	0.0415	0	0	0	0.5403	-2.20	1.8834	124	-14.30	0
FBgn0002641	FBtr0077306	0.4223	3	3	3	0.4622	-1.70	2.8458	119	-5.00	0
FBgn0002643	FBtr0087596	0.0999	6	6	6	0.4284	-6.10	-3.5511	740	-6.20	0
FBgn0002645	FBtr0334299	4.5715	0	0	0	0.4135	-2.00	0.6160	445	-5.10	0
FBgn0002673	FBtr0331445	1.2524	0	0	0	0.4392	-1.50	1.6640	148	-5.20	0
FBgn0002707	FBtr0343574	1.7016	0	0	0	0.3750	-5.40	0.1051	72	-3.90	0
FBgn0002709	FBtr0299823	0.1211	9	9	9	0.4475	-5.50	0.2275	1544	-4.00	1
FBgn0002715	FBtr0342979	0.3658	1	1	1	0.3721	-3.80	-0.2273	86	-1.00	0
FBgn0002716	FBtr0086461	0.0000	5	5	5	0.4176	-2.00	2.9995	886	-4.60	0
FBgn0002719	FBtr0330025	10.4648	0	0	0	0.5155	-1.60	2.7315	258	-9.00	0
FBgn0002723	FBtr0073521	0.5114	1	1	0	0.3750	-5.80	4.2326	744	-9.70	0
FBgn0002733	FBtr0084982	3.1402	0	0	0	0.4308	0.00	4.6059	130	-5.00	0
FBgn0002736	FBtr0071569	1.1369	0	0	0	0.3419	-5.20	0.7742	117	-4.60	0
FBgn0002774	FBtr0100576	0.2232	2	2	1	0.5074	-3.80	-3.2348	879	-1.20	1
FBgn0002775	FBtr0076926	0.4562	0	0	0	0.3514	-1.50	-0.0677	111	-1.50	0
FBgn0002778	FBtr0075627	0.1887	5	5	4	0.4074	-1.10	3.4786	540	-8.70	0
FBgn0002780	FBtr0310268	0.5685	0	0	0	0.4174	-0.60	4.2743	115	0.00	0
FBgn0002781	FBtr0084082	0.1996	0	0	0	0.4672	-1.70	3.0691	458	-4.10	0
FBgn0002783	FBtr0083238	0.7903	0	0	0	0.3564	-2.60	2.5149	101	-0.20	0
FBgn0002787	FBtr0072290	2.4295	0	0	0	0.4649	0.00	2.5927	185	-2.80	0
FBgn0002789	FBtr0087745	22.6985	0	0	0	0.4658	-1.20	2.5971	73	-8.00	0
FBgn0002791	FBtr0072156	0.4987	1	1	1	0.3590	-3.50	-0.5453	78	-4.80	0
FBgn0002868	FBtr0082158	11.4615	0	0	0	0.3920	-2.10	2.5330	125	-4.40	0
FBgn0002872	FBtr0072856	0.3355	0	0	0	0.5385	NA	1.0304	26	NA	NA
FBgn0002873	FBtr0308325	0.4142	3	3	3	0.3866	-4.20	1.9562	388	-7.80	0
FBgn0002878	FBtr0073817	1.0853	0	0	0	0.5000	-6.50	1.3780	108	-5.10	0
FBgn0002887	FBtr0100473	1.0215	1	1	1	0.2843	-1.30	2.7889	102	-8.30	0
FBgn0002891	FBtr0088831	0.0725	0	0	0	0.3803	-8.40	2.8281	71	-2.30	0
FBgn0002899	FBtr0076689	0.6154	0	0	0	0.5172	NA	0.1334	29	NA	NA
FBgn0002901	FBtr0075122	0.5153	1	1	1	0.3861	-2.60	1.9157	101	-1.10	0
FBgn0002905	FBtr0082662	0.4371	0	0	0	0.4022	-3.20	1.6147	92	-2.00	0
FBgn0002906	FBtr0082434	0.6486	1	1	1	0.3571	-3.90	-0.6641	126	-3.80	0
FBgn0002909	FBtr0344453	0.0953	4	4	4	0.5279	-3.20	1.6403	394	-3.10	0
FBgn0002914	FBtr0074171	0.8207	6	6	6	0.4207	-0.90	1.3348	656	-9.20	0
FBgn0002921	FBtr0089516	3.5770	0	0	0	0.5022	-5.40	1.4238	446	-6.70	0
FBgn0002924	FBtr0085534	0.9055	0	0	0	0.4628	-5.00	-0.6273	121	-6.50	0
FBgn0002932	FBtr0082004	0.2916	1	1	1	0.3652	-0.20	1.5979	282	-4.40	0
FBgn0002948	FBtr0073516	1.6705	2	2	2	0.3816	-0.20	-1.7463	152	-7.90	0
FBgn0002962	FBtr0335019	0.0346	0	0	0	0.4106	-7.10	0.6959	263	-2.80	0
FBgn0002973	FBtr0079821	0.0875	2	2	2	0.4352	-6.30	3.1860	563	-2.30	0
FBgn0002989	FBtr0077673	0.1156	1	1	1	0.4600	-3.90	0.8627	50	-5.10	0
FBgn0003008	FBtr0072152	1.7696	0	0	0	0.3580	-2.30	-0.0026	81	-4.40	0
FBgn0003015	FBtr0081954	0.8849	0	0	0	0.5500	NA	0.0126	20	NA	NA
FBgn0003016	FBtr0301494	0.3411	4	4	4	0.4199	-7.40	2.3622	662	-13.40	0
FBgn0003023	FBtr0333146	0.1137	0	0	0	0.5270	-3.10	1.2694	74	-7.90	0
FBgn0003028	FBtr0070740	0.0454	5	5	4	0.5766	-31.60	-2.8609	1169	-7.50	1
FBgn0003041	FBtr0306647	0.0488	0	0	0	0.4050	-11.90	0.6585	279	-1.10	0
FBgn0003042	FBtr0078405	0.2156	0	0	0	0.3182	-0.60	3.5541	110	-4.50	0
FBgn0003044	FBtr0329998	0.2678	8	7	4	0.4418	-2.30	1.6162	498	-6.90	0
FBgn0003048	FBtr0332381	0.3662	1	1	1	0.5590	-8.20	2.6218	415	-7.40	0
FBgn0003053	FBtr0100265	4.8035	0	0	0	0.3449	-2.50	2.5826	519	-6.90	0
FBgn0003062	FBtr0071982	0.3223	0	0	0	0.4427	-6.20	2.4485	131	-7.00	0
FBgn0003071	FBtr0088422	1.5582	1	1	1	0.4651	-3.80	3.1970	559	-9.90	0
FBgn0003074	FBtr0088681	1.0567	0	0	0	0.5156	-7.20	1.7298	320	-4.40	0
FBgn0003076	FBtr0075492	0.5169	0	0	0	0.5366	NA	0.2545	41	NA	0
FBgn0003079	FBtr0070401	0.1737	3	3	2	0.4779	-0.80	2.4217	588	-4.10	0
FBgn0003082	FBtr0088839	0.0819	0	0	0	0.3814	-3.00	-1.3616	97	-6.80	0
FBgn0003087	FBtr0332190	0.7479	1	1	1	0.3455	0.00	4.6059	110	-2.50	0
FBgn0003091	FBtr0087048	10.6728	2	2	2	0.3893	0.00	2.3910	375	-5.80	0
FBgn0003093	FBtr0085359	0.1229	2	2	2	0.4753	-9.40	1.0254	385	-9.10	0
FBgn0003114	FBtr0086306	3.8825	1	1	1	0.3478	NA	2.2046	23	NA	NA
FBgn0003116	FBtr0070389	0.5790	1	1	1	0.4270	-0.90	-0.1376	89	-3.20	0
FBgn0003118	FBtr0089717	1.7535	1	1	1	0.4432	-7.30	1.6067	783	-4.10	0
FBgn0003124	FBtr0100318	0.6304	1	1	1	0.5019	-5.70	3.1352	263	-4.40	0
FBgn0003134	FBtr0084642	0.6939	2	2	2	0.5141	-6.20	2.5330	389	-3.50	0
FBgn0003139	FBtr0331432	0.2521	0	0	0	0.5870	-11.60	1.3765	46	-11.80	0
FBgn0003141	FBtr0089395	0.6380	0	0	0	0.4201	-4.30	0.5619	369	-9.20	0
FBgn0003159	FBtr0070404	0.6384	1	1	1	0.4110	-1.30	1.4436	309	-1.50	0
FBgn0003165	FBtr0081990	0.5151	3	3	3	0.3571	-5.80	-0.9664	871	-8.90	0
FBgn0003169	FBtr0082977	0.2225	2	2	1	0.4891	-6.80	2.7987	458	-8.90	0
FBgn0003175	FBtr0071838	0.2615	5	5	4	0.4486	-6.40	0.0294	555	-15.70	0
FBgn0003187	FBtr0080996	0.0795	2	2	2	0.4407	-11.10	3.2951	447	-5.60	0
FBgn0003189	FBtr0340156	1.0071	0	0	0	0.4183	-2.60	2.2926	153	-8.90	0
FBgn0003204	FBtr0332294	0.2763	0	0	0	0.5033	-4.70	2.1267	302	-15.80	0
FBgn0003205	FBtr0082122	0.7135	0	0	0	0.5125	-4.70	0.5560	441	-5.10	0
FBgn0003206	FBtr0073212	0.4955	0	0	0	0.4660	-5.10	0.1593	103	-13.30	0
FBgn0003209	FBtr0303868	0.2755	10	10	9	0.3963	-3.10	-3.5560	429	-1.40	0
FBgn0003210	FBtr0070702	0.4320	1	1	1	0.4206	-5.70	0.8594	321	-2.20	0
FBgn0003218	FBtr0331717	0.1460	1	1	1	0.5339	-4.40	2.6126	487	-8.10	0
FBgn0003227	FBtr0334595	0.0728	0	0	0	0.5333	NA	1.1348	15	NA	NA
FBgn0003231	FBtr0100289	0.4952	0	0	0	0.4097	-3.10	1.8688	349	-10.70	0
FBgn0003256	FBtr0345337	1.9681	0	0	0	0.2647	-1.50	-0.0357	102	-2.10	0
FBgn0003257	FBtr0084038	1.3396	0	0	0	0.4356	-1.40	1.4916	101	-3.20	0
FBgn0003261	FBtr0078650	0.2173	0	0	0	0.4983	-2.10	0.3250	297	-9.70	0
FBgn0003268	FBtr0085795	0.5312	0	0	0	0.3889	-4.30	1.3940	72	-6.60	0
FBgn0003274	FBtr0087105	0.1393	0	0	0	0.4149	-2.00	2.2218	94	-8.00	0
FBgn0003275	FBtr0078787	1.9840	0	0	0	0.4130	-2.50	-0.5075	92	-8.10	0
FBgn0003277	FBtr0073542	0.2470	1	1	1	0.5083	-10.00	1.0826	360	-3.50	0
FBgn0003278	FBtr0078054	0.8384	0	0	0	0.3838	-3.40	2.5472	99	-4.40	0
FBgn0003279	FBtr0085248	0.2424	0	0	0	0.3542	-4.70	2.8803	96	-8.00	0
FBgn0003285	FBtr0070562	0.3000	0	0	0	0.3963	-6.50	3.0384	540	-5.70	0
FBgn0003292	FBtr0076146	0.0338	5	5	5	0.4110	-0.50	-1.4667	438	-7.50	0
FBgn0003301	FBtr0340467	0.9527	1	1	1	0.5061	-23.80	-2.6231	330	-8.20	1
FBgn0003302	FBtr0307288	0.1189	0	0	0	0.3662	-2.70	1.4780	71	-4.20	0
FBgn0003310	FBtr0077993	0.0556	1	1	1	0.4561	-2.90	-0.9352	1048	-4.70	0
FBgn0003317	FBtr0088832	0.6459	0	0	0	0.4074	-5.30	1.2260	54	-6.10	0
FBgn0003321	FBtr0073411	0.4253	1	1	1	0.3750	-0.90	0.7705	504	-1.70	0
FBgn0003328	FBtr0087370	23.4865	0	0	0	0.4855	-6.30	2.8696	173	-5.20	0
FBgn0003330	FBtr0085245	0.4403	0	0	0	0.3509	-3.30	2.5249	114	-3.20	0
FBgn0003334	FBtr0082102	0.2205	6	6	5	0.4605	-2.50	1.6649	456	-2.40	0
FBgn0003345	FBtr0308132	5.2227	3	3	3	0.5303	-8.40	1.1607	198	-6.90	0
FBgn0003346	FBtr0334174	1.6459	1	1	1	0.3768	-2.10	0.5585	138	0.00	0
FBgn0003353	FBtr0072169	0.7026	0	0	0	0.2830	-1.60	3.3256	53	-3.10	0
FBgn0003360	FBtr0073421	2.3628	0	0	0	0.3962	-4.90	4.2987	106	-9.20	0
FBgn0003371	FBtr0070466	0.8092	0	0	0	0.4596	-3.80	0.4520	285	-5.40	0
FBgn0003391	FBtr0071546	1.8260	4	4	4	0.4378	-9.50	-1.7477	724	-3.70	0
FBgn0003392	FBtr0340413	1.8785	0	0	0	0.4323	-8.60	1.9456	229	-2.70	0
FBgn0003396	FBtr0088099	0.5229	7	7	6	0.4308	-0.80	1.2606	773	-5.20	0
FBgn0003401	FBtr0072237	0.1569	0	0	0	0.3913	-4.90	0.9898	92	-3.70	0
FBgn0003410	FBtr0075332	0.2098	11	11	6	0.4297	-4.30	-2.3969	896	-6.60	1
FBgn0003415	FBtr0333284	0.2744	4	4	4	0.3648	-3.90	0.7301	603	-4.80	0
FBgn0003416	FBtr0074230	0.1015	2	2	2	0.4908	-7.90	0.6773	271	-3.80	0
FBgn0003423	FBtr0307527	1.0795	0	0	0	0.4421	-1.90	-0.7186	95	-3.40	0
FBgn0003435	FBtr0308785	25.1465	1	1	1	0.4173	-4.50	2.7463	635	-6.50	0
FBgn0003444	FBtr0078129	0.1347	1	1	1	0.4098	-1.20	-4.4043	244	-6.20	0
FBgn0003447	FBtr0071101	1.0245	0	0	0	0.4488	-7.20	2.3430	488	-8.10	0
FBgn0003449	FBtr0070748	4.4212	0	0	0	0.4107	-4.70	1.0067	112	-3.80	0
FBgn0003450	FBtr0334520	1.5131	3	3	3	0.2623	0.00	0.8170	61	-1.20	0
FBgn0003459	FBtr0333042	0.2565	0	0	0	0.4746	-5.30	-0.2669	177	-3.40	0
FBgn0003462	FBtr0076229	3.8071	1	1	1	0.3663	-1.60	2.8802	101	-4.70	0
FBgn0003464	FBtr0089679	0.4051	0	0	0	0.5471	-9.20	1.2441	329	-13.40	0
FBgn0003475	FBtr0301884	1.1396	6	6	6	0.3960	-5.70	1.6861	601	-5.30	0
FBgn0003479	FBtr0085589	1.3630	0	0	0	0.3776	-1.80	-0.9170	98	-11.30	0
FBgn0003480	FBtr0082933	0.0312	1	1	1	0.5000	-4.80	0.8604	160	-3.30	0
FBgn0003482	FBtr0085116	1.1131	0	0	0	0.3295	-1.50	1.6000	88	-6.60	0
FBgn0003483	FBtr0083183	0.2458	1	1	1	0.3281	-5.10	2.1267	64	-9.10	0
FBgn0003495	FBtr0114372	0.4539	4	4	4	0.4437	-2.80	-0.2733	861	-6.80	0
FBgn0003502	FBtr0079615	0.4054	2	2	2	0.4124	-5.10	0.4899	434	-5.80	0
FBgn0003507	FBtr0083216	7.8276	0	0	0	0.5581	-12.70	0.6718	86	-6.60	0
FBgn0003510	FBtr0085557	0.0000	0	0	0	0.4222	-7.20	1.8495	45	-5.30	0
FBgn0003511	FBtr0085556	0.6583	0	0	0	0.4255	-7.00	-0.9141	94	-3.00	0
FBgn0003512	FBtr0085558	0.1671	0	0	0	0.3841	-12.70	1.6147	138	-3.80	0
FBgn0003514	FBtr0345294	3.4097	0	0	0	0.5294	0.00	1.6886	153	-6.30	0
FBgn0003517	FBtr0070290	0.1369	1	0	0	0.5056	-4.30	1.6086	180	-7.40	0
FBgn0003520	FBtr0086783	0.1953	4	4	4	0.4270	-6.40	2.2266	274	-2.10	0
FBgn0003525	FBtr0085397	0.1107	3	3	3	0.3804	-0.40	3.6466	397	-2.90	0
FBgn0003527	FBtr0087825	1.0646	1	1	1	0.4024	-6.50	2.9685	82	0.00	0
FBgn0003545	FBtr0086881	0.8329	0	0	0	0.4200	0.00	3.5466	100	-5.70	0
FBgn0003557	FBtr0339529	0.1518	1	1	1	0.5126	-7.30	0.2082	357	-0.40	1
FBgn0003559	FBtr0306544	3.3914	1	1	1	0.4425	-2.20	1.0230	287	-3.20	0
FBgn0003567	FBtr0082946	0.3877	0	0	0	0.3951	-6.40	3.5979	81	-2.30	0
FBgn0003575	FBtr0070120	0.9631	4	4	4	0.4048	-5.60	0.4163	504	-5.30	0
FBgn0003598	FBtr0082736	0.4137	0	0	0	0.3947	-5.90	-0.4767	152	-9.40	0
FBgn0003607	FBtr0079635	1.8232	0	0	0	0.3642	-2.70	4.6059	162	-4.70	0
FBgn0003612	FBtr0088576	0.6271	2	2	2	0.4350	-6.30	-0.6089	246	-5.70	0
FBgn0003638	FBtr0070176	0.1727	3	3	3	0.4233	-6.30	-0.1773	215	-1.60	0
FBgn0003654	FBtr0340360	3.2523	3	3	3	0.4322	-5.00	1.7929	199	-0.20	0
FBgn0003655	FBtr0070922	0.3853	1	1	1	0.4554	-8.40	0.4353	112	-5.20	0
FBgn0003656	FBtr0071125	0.2380	3	3	3	0.4518	-6.10	1.9962	695	-2.90	0
FBgn0003660	FBtr0088362	1.3794	0	0	0	0.3767	-1.70	3.3348	146	-4.10	0
FBgn0003676	FBtr0084291	1.1269	0	0	0	0.3611	-3.00	2.3208	108	-2.50	0
FBgn0003687	FBtr0071679	0.9162	1	1	1	0.3895	-1.20	1.3328	190	-3.50	0
FBgn0003701	FBtr0340283	0.3134	2	2	2	0.4159	-2.60	3.2912	113	-7.80	0
FBgn0003714	FBtr0070459	1.6924	0	0	0	0.4136	-0.20	0.1001	191	-6.60	0
FBgn0003716	FBtr0079086	0.6623	0	0	0	0.3934	-3.70	2.6925	61	-4.80	0
FBgn0003721	FBtr0089960	0.7983	0	0	0	0.4292	-2.20	3.9250	438	-6.30	0
FBgn0003732	FBtr0081287	0.1685	1	1	1	0.4481	-1.50	1.7580	270	-7.20	0
FBgn0003733	FBtr0339117	0.1600	1	1	1	0.3766	-2.30	1.9194	239	-4.90	0
FBgn0003741	FBtr0075364	2.2821	0	0	0	0.4286	NA	-2.9768	7	NA	NA
FBgn0003742	FBtr0089617	0.1849	1	1	1	0.4182	-1.70	-1.1513	165	-3.30	0
FBgn0003744	FBtr0074922	0.4667	0	0	0	0.5142	-3.30	-2.2958	212	-5.20	0
FBgn0003748	FBtr0071537	7.9127	1	1	1	0.4200	-11.90	1.6067	250	-6.40	0
FBgn0003751	FBtr0080078	1.0410	0	0	0	0.3739	-7.90	-0.0604	115	-6.70	0
FBgn0003862	FBtr0082949	0.3928	7	7	7	0.4348	-7.50	2.2918	713	-10.50	0
FBgn0003870	FBtr0085828	0.3379	7	7	7	0.4646	-4.30	-0.7630	495	-6.70	0
FBgn0003882	FBtr0302338	0.1266	2	2	2	0.4787	-12.80	2.9796	188	-12.30	0
FBgn0003884	FBtr0081639	1.4060	0	0	0	0.4196	-2.00	1.0044	143	-5.30	0
FBgn0003885	FBtr0081538	1.5895	2	2	2	0.4111	-3.10	1.7565	506	-4.60	0
FBgn0003887	FBtr0086536	1.8595	0	0	0	0.3243	0.00	3.8795	111	-5.90	0
FBgn0003888	FBtr0343443	14.0023	0	0	0	0.5124	-1.40	2.7658	201	-5.30	0
FBgn0003891	FBtr0071582	1.1462	0	0	0	0.4404	0.00	1.9850	495	-3.20	0
FBgn0003941	FBtr0077470	0.6874	0	0	0	0.4375	-6.50	-0.4896	64	-2.90	0
FBgn0003942	FBtr0080016	0.2980	0	0	0	0.4000	-14.00	2.0860	55	-5.10	0
FBgn0003943	FBtr0333142	9.5047	0	0	0	0.3171	0.00	3.2732	123	-3.20	0
FBgn0003950	FBtr0340040	0.4020	1	1	1	0.4784	-6.50	-0.2400	485	-3.00	0
FBgn0003963	FBtr0310027	2.9209	4	4	4	0.4802	-10.10	1.9672	481	-7.80	0
FBgn0003964	FBtr0070346	0.1029	3	3	2	0.5063	0.00	0.6599	399	-6.10	1
FBgn0003969	FBtr0074140	0.2985	3	3	2	0.3835	-2.20	2.6045	352	-8.00	0
FBgn0003977	FBtr0072037	0.4158	0	0	0	0.3663	-1.50	3.1515	101	-4.00	0
FBgn0003978	FBtr0081347	0.7444	1	1	1	0.4938	-5.50	0.1590	81	-6.40	0
FBgn0003979	FBtr0333232	16.7261	0	0	0	0.5309	-0.10	3.1367	81	-3.70	0
FBgn0003980	FBtr0345439	17.7317	0	0	0	0.5161	-2.30	1.9301	62	-0.80	0
FBgn0003983	FBtr0080521	16.8129	0	0	0	0.4130	-2.30	3.6241	46	-3.70	0
FBgn0003997	FBtr0075133	1.7074	2	2	2	0.3545	0.00	2.9299	519	-3.70	0
FBgn0004045	FBtr0071419	12.0530	0	0	0	0.5231	-2.10	1.2157	65	-8.70	0
FBgn0004047	FBtr0346090	17.2046	0	0	0	0.4286	-7.50	4.3002	56	-8.20	0
FBgn0004049	FBtr0082793	0.2269	2	2	2	0.4508	-0.40	2.9642	712	-11.30	1
FBgn0004050	FBtr0100380	0.0976	2	2	2	0.4692	-0.30	-0.7470	341	-9.90	1
FBgn0004055	FBtr0072397	1.8718	3	3	3	0.4297	-0.30	1.8818	263	-6.20	0
FBgn0004057	FBtr0340611	0.4994	0	0	0	0.3967	-0.20	1.5482	121	-1.20	0
FBgn0004066	FBtr0074210	2.5842	0	0	0	0.3851	-2.90	2.8845	148	-1.40	0
FBgn0004087	FBtr0083295	2.2969	1	1	1	0.3704	NA	-0.2935	27	NA	NA
FBgn0004101	FBtr0072271	1.1299	0	0	0	0.5077	-9.90	1.8496	388	-13.50	0
FBgn0004103	FBtr0082595	7.2664	0	0	0	0.4847	-4.80	3.1706	229	-12.30	0
FBgn0004106	FBtr0080051	2.1880	0	0	0	0.3412	-2.20	0.0553	85	-4.90	0
FBgn0004107	FBtr0083921	0.6146	0	0	0	0.3378	-4.90	-2.6819	74	-3.70	0
FBgn0004108	FBtr0075322	0.6198	1	1	1	0.4141	-2.70	2.2844	512	-4.40	0
FBgn0004132	FBtr0088953	1.5554	1	1	1	0.4079	-0.40	2.0203	76	-12.20	0
FBgn0004133	FBtr0088952	4.2956	2	2	2	0.4911	-1.20	0.5149	395	-10.80	0
FBgn0004167	FBtr0300017	0.5905	0	0	0	0.4150	-1.90	0.1811	147	-5.60	0
FBgn0004177	FBtr0079525	3.7607	0	0	0	0.4402	-1.40	-0.2418	259	-9.40	0
FBgn0004179	FBtr0078495	0.3829	0	0	0	0.4649	-5.00	1.1087	185	-1.50	0
FBgn0004227	FBtr0074232	0.8333	0	0	0	0.3178	0.00	3.8336	129	-5.40	0
FBgn0004237	FBtr0300590	0.4889	0	0	0	0.3819	-9.30	0.7503	144	-4.00	0
FBgn0004359	FBtr0336724	0.4120	5	5	5	0.4385	-9.00	0.5554	659	-3.10	0
FBgn0004362	FBtr0071708	5.8303	0	0	0	0.3404	-1.20	1.3594	94	-2.80	0
FBgn0004363	FBtr0305260	1.8131	0	0	0	0.3429	NA	3.4786	35	NA	NA
FBgn0004367	FBtr0074271	0.0755	0	0	0	0.4286	-8.40	3.3592	63	-13.70	0
FBgn0004368	FBtr0070724	0.4671	6	6	5	0.3792	-5.20	2.8388	298	-3.40	0
FBgn0004369	FBtr0303454	0.6644	2	2	2	0.4398	-3.90	-1.6568	382	-8.60	0
FBgn0004370	FBtr0331406	2.1402	3	3	3	0.4335	0.00	3.3196	489	-6.00	0
FBgn0004373	FBtr0072516	0.4303	12	12	12	0.4696	-0.30	4.3264	1184	-4.60	0
FBgn0004374	FBtr0081332	0.4502	0	0	0	0.3500	0.00	1.1182	100	0.00	0
FBgn0004378	FBtr0072733	0.5913	0	0	0	0.4185	-3.20	2.7158	270	-0.10	0
FBgn0004379	FBtr0076499	0.4877	1	1	1	0.4074	-2.80	1.8533	162	-1.80	0
FBgn0004380	FBtr0077157	0.3935	0	0	0	0.4275	-3.70	0.6916	138	-5.20	0
FBgn0004381	FBtr0076030	0.3953	0	0	0	0.4511	-7.90	-0.0327	184	-5.70	0
FBgn0004387	FBtr0085211	0.3761	8	8	8	0.4424	-1.70	2.7193	773	-6.50	0
FBgn0004390	FBtr0076368	0.2997	5	5	5	0.4249	-12.00	1.6633	473	-2.40	0
FBgn0004391	FBtr0074077	0.4747	1	1	1	0.3585	-6.60	0.4178	106	-4.00	0
FBgn0004395	FBtr0084403	0.8312	0	0	0	0.4211	NA	1.6090	19	NA	NA
FBgn0004397	FBtr0070420	1.6719	0	0	0	0.4858	-1.60	3.2888	212	-11.60	0
FBgn0004400	FBtr0086897	0.0792	0	0	0	0.5000	NA	-1.8812	40	NA	0
FBgn0004401	FBtr0075200	0.4789	0	0	0	0.4638	-4.90	3.2149	207	-9.40	0
FBgn0004403	FBtr0071094	0.5514	0	0	0	0.4138	-6.30	1.8234	58	-3.90	0
FBgn0004404	FBtr0345291	0.3296	0	0	0	0.5161	NA	1.8475	31	NA	NA
FBgn0004406	FBtr0080571	0.0740	1	1	1	0.4815	-11.70	-0.9673	81	-9.70	0
FBgn0004407	FBtr0091627	0.2982	1	1	1	0.5535	-7.30	0.9100	477	-7.00	0
FBgn0004419	FBtr0079975	2.7638	1	1	1	0.3179	0.00	1.3586	195	-6.10	0
FBgn0004432	FBtr0074238	3.9683	0	0	0	0.5294	NA	2.1214	34	NA	NA
FBgn0004435	FBtr0087829	0.7043	12	12	11	0.3919	-5.70	0.1124	1314	-8.80	0
FBgn0004436	FBtr0306106	2.8739	0	0	0	0.4516	-6.70	2.9685	186	-4.90	0
FBgn0004449	FBtr0078509	0.4190	5	5	5	0.5320	-12.40	1.2954	671	-4.70	0
FBgn0004462	FBtr0074634	1.6711	0	0	0	0.4973	-1.70	-4.1492	368	-10.60	0
FBgn0004463	FBtr0087977	1.0497	0	0	0	0.3205	-1.30	3.2274	78	-3.40	0
FBgn0004465	FBtr0075359	0.7317	0	0	0	0.3659	-3.40	-1.1649	82	-10.20	0
FBgn0004507	FBtr0077828	1.1451	0	0	0	0.5377	-0.70	2.0402	199	-8.80	0
FBgn0004509	FBtr0089985	1.4947	7	7	7	0.4256	-2.70	2.6242	672	-6.50	0
FBgn0004510	FBtr0085088	0.4535	1	1	1	0.3810	-3.30	0.4527	126	-5.20	0
FBgn0004556	FBtr0075347	1.0926	0	0	0	0.3452	-1.10	0.9505	84	-4.70	0
FBgn0004574	FBtr0310632	1.0301	0	0	0	0.3791	-3.00	2.8543	182	-0.10	0
FBgn0004583	FBtr0329832	0.7049	2	2	2	0.4554	-7.80	0.1858	718	-4.80	0
FBgn0004584	FBtr0077678	0.3574	0	0	0	0.4455	-1.60	1.4349	211	-6.90	0
FBgn0004587	FBtr0082801	1.0314	0	0	0	0.4545	-3.60	0.3282	154	-6.10	0
FBgn0004597	FBtr0083010	2.6236	0	0	0	0.4324	-7.00	2.8303	148	-8.90	0
FBgn0004598	FBtr0074267	0.4943	1	1	1	0.4201	-3.90	1.3856	219	-9.70	0
FBgn0004606	FBtr0085702	0.1105	1	1	1	0.4006	0.00	2.3910	342	-4.50	0
FBgn0004611	FBtr0078048	0.2461	6	6	5	0.4616	-2.90	-0.6928	691	-2.60	0
FBgn0004629	FBtr0082980	10.6033	0	0	0	0.5278	NA	3.2670	36	NA	NA
FBgn0004636	FBtr0332671	0.5533	0	0	0	0.4380	-0.50	0.5323	605	-1.40	0
FBgn0004638	FBtr0087695	2.0420	0	0	0	0.4028	-4.30	4.2987	283	-8.50	0
FBgn0004643	FBtr0070441	0.0893	0	0	0	0.4434	-4.10	0.3530	106	-3.80	0
FBgn0004646	FBtr0309873	10.8333	3	3	3	0.4788	-2.70	2.5267	259	-5.20	0
FBgn0004647	FBtr0070507	0.1957	6	6	3	0.4311	-2.50	1.3671	798	-8.00	0
FBgn0004648	FBtr0290016	1.3054	3	3	3	0.4615	-8.40	3.3196	494	-16.20	0
FBgn0004649	FBtr0073898	1.3802	0	0	0	0.4364	-1.70	-1.7073	165	-9.60	0
FBgn0004650	FBtr0070207	0.1304	0	0	0	0.3607	-5.50	2.9423	61	-1.40	0
FBgn0004654	FBtr0331410	0.4377	0	0	0	0.4091	-3.90	2.1397	44	-3.90	0
FBgn0004655	FBtr0070430	0.1779	1	1	1	0.5668	-13.40	-2.7969	1018	-5.50	0
FBgn0004656	FBtr0071119	0.1611	2	2	2	0.4992	-1.40	2.4454	637	-5.30	1
FBgn0004657	FBtr0071105	2.4991	0	0	0	0.5528	-0.70	0.8964	199	-1.70	0
FBgn0004666	FBtr0334613	8.7406	3	3	3	0.5357	-9.40	0.2614	196	-6.20	0
FBgn0004687	FBtr0070783	6.6226	0	0	0	0.3500	-4.80	1.3373	120	-2.40	0
FBgn0004698	FBtr0087373	1.4574	2	2	2	0.4111	-0.60	1.1573	270	-2.00	0
FBgn0004795	FBtr0072072	0.0310	3	3	1	0.4085	-8.80	-1.2808	568	-6.00	0
FBgn0004797	FBtr0080915	0.3285	0	0	0	0.4375	-7.50	2.7001	144	-6.50	0
FBgn0004811	FBtr0081316	0.5988	1	1	1	0.4476	-1.20	3.6965	105	-6.70	0
FBgn0004828	FBtr0071345	9.6202	0	0	0	0.3070	-1.40	3.1469	114	-1.30	0
FBgn0004832	FBtr0070670	1.8400	0	0	0	0.3462	-5.40	1.0930	78	-0.90	0
FBgn0004837	FBtr0080700	0.1848	3	3	3	0.4232	-3.10	-0.1022	449	-2.80	0
FBgn0004838	FBtr0079346	0.6373	1	1	1	0.3617	-2.50	2.0652	376	-3.80	0
FBgn0004855	FBtr0346348	1.6187	0	0	0	0.4651	-2.70	0.9463	43	-2.50	0
FBgn0004856	FBtr0333809	0.9756	0	0	0	0.3949	0.00	-0.9668	157	-3.60	0
FBgn0004860	FBtr0070433	1.0152	3	3	3	0.2500	0.00	-0.1894	68	-4.00	0
FBgn0004862	FBtr0084087	0.0000	0	0	0	0.3926	-0.80	2.2121	135	-6.10	0
FBgn0004864	FBtr0073457	0.2166	3	3	3	0.5236	-3.80	-3.4818	636	-5.30	0
FBgn0004867	FBtr0079905	0.0949	0	0	0	0.4000	-3.40	4.2089	50	-1.90	0
FBgn0004868	FBtr0306169	1.5088	0	0	0	0.4309	-7.40	1.9632	181	-9.00	0
FBgn0004872	FBtr0080166	0.4745	0	0	0	0.3977	-2.90	2.9751	88	-2.10	0
FBgn0004875	FBtr0073152	0.0800	4	4	4	0.4340	-1.70	-1.2535	265	-2.40	0
FBgn0004876	FBtr0083716	0.3920	13	13	12	0.4400	-13.60	3.2488	1100	-5.30	0
FBgn0004882	FBtr0084386	0.0655	0	0	0	0.1972	0.00	-1.2666	71	-1.00	0
FBgn0004888	FBtr0073151	0.3670	0	0	0	0.4074	-1.20	0.8790	108	-7.00	0
FBgn0004889	FBtr0082188	2.2543	2	2	2	0.4154	-6.00	3.1313	544	-8.40	0
FBgn0004901	FBtr0304705	0.1578	0	0	0	0.5054	-6.90	3.0384	93	-10.70	0
FBgn0004903	FBtr0085093	1.8164	1	1	1	0.3769	-3.70	3.6820	130	-5.90	0
FBgn0004907	FBtr0332917	3.7584	0	0	0	0.3975	0.00	4.0480	161	-3.90	0
FBgn0004908	FBtr0081838	3.1232	0	0	0	0.2785	-5.40	-1.0504	79	-0.40	0
FBgn0004913	FBtr0078837	0.6607	0	0	0	0.4130	-6.80	0.0719	92	-8.70	0
FBgn0004914	FBtr0079748	0.2490	0	0	0	0.2667	NA	3.2504	15	NA	NA
FBgn0004915	FBtr0333489	2.2004	0	0	0	0.3385	-5.70	0.4858	65	-10.10	0
FBgn0004921	FBtr0088646	5.9110	0	0	0	0.4385	-4.30	1.7074	301	-1.50	0
FBgn0004924	FBtr0074005	0.0597	0	0	0	0.4536	-3.20	3.2172	302	-6.70	0
FBgn0004926	FBtr0075968	0.5253	1	1	1	0.4219	-3.10	3.3004	128	-8.40	0
FBgn0004957	FBtr0074577	0.1206	0	0	0	0.4898	-7.30	-1.0084	98	-4.50	0
FBgn0005198	FBtr0074819	0.5243	0	0	0	0.5156	-3.00	1.9218	128	-4.10	0
FBgn0005278	FBtr0089430	0.2306	0	0	0	0.4677	0.00	2.9941	263	-3.10	0
FBgn0005322	FBtr0343612	0.3998	1	1	1	0.4595	-6.50	3.2212	111	-14.70	0
FBgn0005355	FBtr0082665	0.5984	1	1	1	0.4000	NA	1.4405	30	NA	NA
FBgn0005386	FBtr0306009	0.0675	6	6	6	0.4718	0.00	1.2092	390	-2.10	0
FBgn0005390	FBtr0070892	0.1015	0	0	0	0.3667	-6.80	2.1937	90	-3.70	0
FBgn0005391	FBtr0339648	12.0521	1	1	1	0.4314	-4.80	2.9947	51	-4.40	0
FBgn0005411	FBtr0307178	1.0607	0	0	0	0.2901	-3.00	2.2003	162	-1.70	0
FBgn0005427	FBtr0308208	0.2054	5	5	4	0.4403	-5.90	4.2481	561	-8.00	0
FBgn0005533	FBtr0076479	0.1951	0	0	0	0.4167	-5.40	2.7676	60	-4.60	0
FBgn0005536	FBtr0308212	0.6452	2	2	2	0.4509	-15.00	2.5267	743	-6.10	0
FBgn0005585	FBtr0334618	1.3891	0	0	0	0.4767	-7.30	-1.5762	86	-3.40	0
FBgn0005593	FBtr0343653	0.3294	0	0	0	0.5241	-4.40	1.7108	145	-12.20	0
FBgn0005596	FBtr0085415	0.3533	4	4	4	0.5059	-2.60	0.5211	678	-6.60	1
FBgn0005612	FBtr0072158	5.5035	1	1	1	0.5205	-8.80	2.0335	317	-4.60	0
FBgn0005617	FBtr0081130	0.1814	2	2	2	0.4480	-6.10	0.2194	375	-4.30	0
FBgn0005624	FBtr0345375	0.2584	6	6	6	0.4517	-1.50	0.0570	1005	-3.80	0
FBgn0005630	FBtr0089349	0.5554	0	0	0	0.4726	0.00	2.5755	402	-3.10	0
FBgn0005632	FBtr0307550	1.1511	2	2	2	0.5081	-9.60	2.2924	555	-5.30	0
FBgn0005640	FBtr0073131	0.4907	8	8	8	0.4262	-1.10	1.3668	1023	-11.50	0
FBgn0005642	FBtr0085356	0.0707	2	2	2	0.5079	-8.10	-2.5887	252	-3.40	0
FBgn0005648	FBtr0088785	0.3815	1	1	1	0.3941	-2.20	1.9282	406	-6.50	0
FBgn0005649	FBtr0084592	0.2192	3	3	3	0.3923	-1.90	1.2496	915	-9.20	0
FBgn0005654	FBtr0087769	1.0457	0	0	0	0.4651	-4.30	0.0363	129	-4.10	0
FBgn0005655	FBtr0086308	3.4769	0	0	0	0.3483	0.00	1.7608	89	-8.20	0
FBgn0005671	FBtr0082670	1.7387	0	0	0	0.4713	-6.90	2.7397	244	-11.30	0
FBgn0005672	FBtr0081268	0.6201	5	5	5	0.4018	-3.50	-0.9258	555	-3.50	0
FBgn0005674	FBtr0084512	1.3119	0	0	0	0.3333	NA	-5.7058	6	NA	NA
FBgn0005683	FBtr0333490	0.4101	2	2	2	0.3577	-5.30	0.4702	137	-3.70	0
FBgn0005694	FBtr0078348	0.1613	6	6	5	0.4456	-2.10	-3.1675	469	-9.80	0
FBgn0005695	FBtr0088710	0.1494	2	2	1	0.4087	-4.80	0.8525	230	-3.10	0
FBgn0005696	FBtr0114543	0.7594	0	0	0	0.4144	-1.80	-1.9888	111	-10.00	0
FBgn0005777	FBtr0082129	2.0449	0	0	0	0.2131	0.00	2.5093	61	0.00	0
FBgn0008635	FBtr0074576	1.8218	0	0	0	0.4832	-5.10	1.8312	149	-6.00	0
FBgn0010019	FBtr0070099	48.7538	0	0	0	0.4953	-1.80	2.2466	107	-13.50	0
FBgn0010038	FBtr0082569	1.4957	0	0	0	0.4074	NA	3.1752	27	NA	NA
FBgn0010039	FBtr0082570	1.4273	0	0	0	0.6129	-8.90	-3.5463	62	-8.00	0
FBgn0010051	FBtr0344265	0.8968	3	3	3	0.5194	-9.40	1.7765	1057	-6.60	0
FBgn0010053	FBtr0086625	0.6838	0	0	0	0.5294	NA	-0.7276	34	NA	NA
FBgn0010078	FBtr0071897	0.3305	0	0	0	0.4627	-4.00	4.0480	67	-6.40	0
FBgn0010097	FBtr0332572	4.9774	1	1	1	0.3784	-1.50	3.3394	74	-2.90	0
FBgn0010100	FBtr0343871	2.9194	0	0	0	0.4298	-10.40	1.2018	121	-9.10	0
FBgn0010113	FBtr0085619	0.5784	3	3	3	0.3646	-1.60	-3.1933	1012	-6.20	0
FBgn0010173	FBtr0081867	2.5627	1	1	1	0.3580	-4.30	4.6558	81	-0.70	0
FBgn0010194	FBtr0343046	0.6446	4	4	4	0.3852	-1.40	0.6603	553	-5.30	0
FBgn0010198	FBtr0073794	0.3549	0	0	0	0.3824	-5.00	0.4975	136	-5.30	0
FBgn0010213	FBtr0345492	3.0070	0	0	0	0.3492	-3.40	-0.0036	126	-5.80	0
FBgn0010215	FBtr0070038	2.2937	0	0	0	0.3333	-1.70	-4.1328	54	-1.60	0
FBgn0010217	FBtr0344754	4.8539	0	0	0	0.3846	NA	3.3656	26	NA	NA
FBgn0010220	FBtr0088564	0.4192	0	0	0	0.3247	-1.80	2.2918	77	-5.40	0
FBgn0010222	FBtr0081997	3.7732	0	0	0	0.4105	-0.80	3.5964	95	-3.40	0
FBgn0010223	FBtr0075354	0.2805	0	0	0	0.4084	-3.30	1.9678	333	-6.50	0
FBgn0010225	FBtr0078973	7.0850	1	1	1	0.4621	-9.80	2.5252	290	-6.80	0
FBgn0010226	FBtr0087005	0.7009	0	0	0	0.4957	-5.40	1.3308	234	-4.80	0
FBgn0010228	FBtr0071674	11.3868	0	0	0	0.4252	0.00	1.7557	214	-2.20	0
FBgn0010235	FBtr0075951	3.2733	0	0	0	0.3361	-3.90	3.5878	119	-2.90	0
FBgn0010238	FBtr0087933	5.4665	0	0	0	0.4832	-7.80	1.1057	327	-6.30	0
FBgn0010246	FBtr0072672	7.8872	2	2	2	0.4854	-4.80	2.4838	309	-8.30	0
FBgn0010247	FBtr0113885	2.5389	0	0	0	0.2400	-2.40	0.5563	75	-1.40	0
FBgn0010265	FBtr0346454	0.3076	0	0	0	0.4545	-6.30	3.4923	99	-4.00	0
FBgn0010269	FBtr0340120	0.3484	0	0	0	0.3529	-4.30	1.1719	170	-7.60	0
FBgn0010278	FBtr0072242	0.5217	0	0	0	0.4326	-4.60	0.3546	141	-14.80	0
FBgn0010280	FBtr0345951	0.2819	2	2	2	0.5244	-2.00	1.8818	164	-8.50	0
FBgn0010282	FBtr0081719	0.4620	1	1	1	0.4031	0.00	0.2708	129	-3.40	0
FBgn0010287	FBtr0079542	0.6010	0	0	0	0.4211	-4.50	-0.4493	76	-3.30	0
FBgn0010288	FBtr0303459	5.0124	1	1	1	0.3438	-3.00	1.7328	128	-0.10	0
FBgn0010292	FBtr0071090	0.1481	0	0	0	0.3661	-0.50	4.2987	112	-2.00	0
FBgn0010300	FBtr0081159	0.1744	1	1	1	0.4214	-4.70	3.1171	541	0.00	0
FBgn0010303	FBtr0330396	0.2285	5	5	4	0.4544	-2.90	0.4227	658	-7.10	0
FBgn0010309	FBtr0302561	0.1027	2	2	2	0.3488	-1.70	3.3212	86	-5.80	0
FBgn0010313	FBtr0308118	0.4865	5	5	5	0.4134	-2.40	1.6225	687	-6.60	0
FBgn0010314	FBtr0079799	5.5952	0	0	0	0.4452	-7.80	1.8075	292	-1.70	0
FBgn0010315	FBtr0300391	0.0524	2	2	2	0.4093	-6.30	0.9806	259	-4.90	0
FBgn0010316	FBtr0088469	0.5504	0	0	0	0.4297	-2.70	3.2014	619	-7.80	0
FBgn0010317	FBtr0073128	0.0749	1	1	0	0.3874	-3.70	1.8950	111	-2.00	0
FBgn0010328	FBtr0085178	0.2679	4	4	4	0.4658	-1.40	2.9202	380	-3.80	0
FBgn0010333	FBtr0331868	1.8880	0	0	0	0.5045	-3.70	0.5858	337	-5.70	0
FBgn0010339	FBtr0087976	0.3915	1	1	1	0.3920	-8.60	0.1681	125	-4.40	0
FBgn0010340	FBtr0337095	2.9238	0	0	0	0.3750	-0.30	3.5042	72	-7.40	0
FBgn0010341	FBtr0309214	0.5687	0	0	0	0.4684	-1.10	2.1922	158	-4.10	0
FBgn0010342	FBtr0088530	1.9024	0	0	0	0.4877	-10.50	2.0607	162	-4.30	0
FBgn0010348	FBtr0299906	4.9126	0	0	0	0.4341	0.00	0.8680	205	-3.70	0
FBgn0010350	FBtr0076688	0.3601	1	1	1	0.4927	-0.70	1.3330	205	-10.50	0
FBgn0010352	FBtr0075268	0.5664	0	0	0	0.3538	-4.20	3.2495	65	-6.50	0
FBgn0010355	FBtr0081684	0.9710	1	1	1	0.4356	-1.90	2.9020	101	-9.40	0
FBgn0010356	FBtr0088240	2.4802	0	0	0	0.3676	0.00	2.4987	68	-0.70	0
FBgn0010379	FBtr0344470	1.5666	0	0	0	0.5603	-3.50	1.3577	307	-2.90	0
FBgn0010380	FBtr0074789	1.9517	0	0	0	0.4505	-4.30	1.8312	111	-5.70	0
FBgn0010381	FBtr0073073	29.0202	0	0	0	0.3968	-1.60	1.9632	63	-1.20	0
FBgn0010382	FBtr0080773	0.1989	1	1	1	0.4505	-10.90	0.4761	273	-3.70	0
FBgn0010387	FBtr0076916	14.1936	0	0	0	0.3448	NA	1.8234	29	NA	NA
FBgn0010388	FBtr0087436	12.3681	0	0	0	0.4828	NA	3.0453	29	NA	NA
FBgn0010391	FBtr0073480	0.9586	2	2	2	0.4779	-6.60	2.2848	113	-6.60	0
FBgn0010397	FBtr0087512	4.8102	0	0	0	0.3630	-1.10	3.3149	146	-4.70	0
FBgn0010398	FBtr0331671	0.8281	1	1	1	0.3846	-5.50	0.5695	91	-7.30	0
FBgn0010406	FBtr0076752	2.0696	0	0	0	0.3086	-0.80	3.6466	81	-4.50	0
FBgn0010408	FBtr0342577	0.1600	0	0	0	0.5556	NA	1.9157	27	NA	NA
FBgn0010409	FBtr0086947	0.2261	0	0	0	0.5000	NA	3.2008	36	NA	NA
FBgn0010411	FBtr0086274	0.7288	0	0	0	0.3684	NA	3.3592	38	NA	NA
FBgn0010412	FBtr0340149	0.7126	0	0	0	0.3529	NA	1.8006	34	NA	NA
FBgn0010415	FBtr0071706	1.0562	1	1	1	0.3988	-1.70	2.1678	336	-6.80	0
FBgn0010416	FBtr0074305	1.6159	2	2	2	0.1786	-2.00	3.8492	84	-0.50	0
FBgn0010417	FBtr0074941	0.6206	0	0	0	0.4444	-3.30	0.7737	72	-13.40	0
FBgn0010421	FBtr0082310	1.5537	0	0	0	0.3524	-3.30	1.9938	105	-1.30	0
FBgn0010422	FBtr0332475	0.9349	1	1	1	0.4556	-3.60	3.9187	259	-6.10	0
FBgn0010431	FBtr0076613	7.1776	0	0	0	0.3810	-3.20	4.2307	63	-3.90	0
FBgn0010434	FBtr0086509	18.0533	0	0	0	0.4501	-5.30	2.1097	371	-4.30	0
FBgn0010438	FBtr0083277	0.7032	0	0	0	0.2143	NA	2.5330	14	NA	NA
FBgn0010441	FBtr0085179	0.3854	1	1	1	0.5289	-4.50	2.0335	225	-3.00	0
FBgn0010470	FBtr0071703	1.0227	0	0	0	0.5906	-7.80	0.6679	149	-9.50	0
FBgn0010488	FBtr0087786	2.1498	6	6	6	0.5517	-8.90	-4.2549	2184	-6.20	1
FBgn0010497	FBtr0080292	0.1140	0	0	0	0.4797	-5.00	1.7582	344	-5.20	0
FBgn0010501	FBtr0072062	0.3081	0	0	0	0.4951	-0.80	2.0537	410	-10.00	0
FBgn0010504	FBtr0088811	0.2348	2	2	2	0.5056	-4.80	0.3573	712	-14.60	0
FBgn0010516	FBtr0088083	4.1742	0	0	0	0.4079	-0.20	3.6746	76	-8.10	0
FBgn0010520	FBtr0079874	0.1947	0	0	0	0.3516	-2.80	1.5744	91	-0.50	0
FBgn0010531	FBtr0333068	1.2868	0	0	0	0.3400	-2.10	3.9512	50	-4.70	0
FBgn0010548	FBtr0300479	1.4169	0	0	0	0.5000	-1.60	2.1703	138	-5.50	0
FBgn0010549	FBtr0302504	0.7985	0	0	0	0.3481	0.00	1.5624	293	-2.30	0
FBgn0010551	FBtr0086615	1.4650	0	0	0	0.4571	-0.20	3.4424	70	-7.00	0
FBgn0010575	FBtr0301551	0.2744	2	2	2	0.3757	-4.50	-0.6292	181	-2.40	0
FBgn0010583	FBtr0078013	0.6630	5	5	5	0.5439	-13.20	-1.0910	1184	-12.50	0
FBgn0010590	FBtr0087262	4.3511	0	0	0	0.3187	-3.70	1.7565	91	-3.50	0
FBgn0010591	FBtr0087007	1.2746	2	2	2	0.4625	-7.20	0.8070	160	-5.80	0
FBgn0010602	FBtr0078082	2.7438	0	0	0	0.5124	-7.80	1.0254	283	-4.50	0
FBgn0010607	FBtr0079050	0.3250	0	0	0	0.3810	-3.00	2.0339	189	-4.20	0
FBgn0010611	FBtr0340059	0.1297	0	0	0	0.4015	-1.00	1.7137	137	-14.50	0
FBgn0010612	FBtr0305994	3.7785	0	0	0	0.3774	-5.00	2.6857	53	-5.00	0
FBgn0010620	FBtr0086909	14.7675	2	2	2	0.4050	-6.40	2.5528	442	-5.40	0
FBgn0010621	FBtr0087988	1.3890	0	0	0	0.4667	NA	-1.4939	15	NA	NA
FBgn0010622	FBtr0336732	3.3389	0	0	0	0.3614	0.00	3.1714	83	-3.70	0
FBgn0010638	FBtr0087498	2.2454	0	0	0	0.4961	-5.10	2.9182	129	-4.90	0
FBgn0010660	FBtr0071996	1.3240	0	0	0	0.4432	-3.60	4.2544	88	-5.50	0
FBgn0010741	FBtr0332708	2.3330	0	0	0	0.4366	-7.00	0.6185	142	-5.60	0
FBgn0010747	FBtr0077169	1.0277	0	0	0	0.5119	-2.40	2.7537	168	-6.00	0
FBgn0010750	FBtr0078868	1.0973	1	1	1	0.4653	-3.90	2.3411	101	-7.70	0
FBgn0010762	FBtr0331574	0.5818	4	4	2	0.4256	-4.00	2.8281	672	-2.00	0
FBgn0010768	FBtr0083733	0.0707	0	0	0	0.5167	-10.20	-4.7341	896	-4.00	0
FBgn0010770	FBtr0084012	0.3772	0	0	0	0.4200	-1.20	2.8241	50	-5.40	0
FBgn0010772	FBtr0078728	0.3188	3	3	3	0.4300	-4.10	3.9293	507	0.00	0
FBgn0010774	FBtr0081642	0.7986	0	0	0	0.4045	-1.20	3.1352	178	-4.60	0
FBgn0010786	FBtr0072679	0.0591	1	1	1	0.4233	-4.00	0.0759	352	-3.80	0
FBgn0010803	FBtr0081981	0.8141	1	1	1	0.3982	-6.30	2.1703	113	-7.10	0
FBgn0010808	FBtr0085745	1.3139	0	0	0	0.4545	-3.80	2.6938	121	-8.20	0
FBgn0010812	FBtr0081788	1.4105	0	0	0	0.4385	-4.30	1.9433	244	-9.30	0
FBgn0010825	FBtr0076619	0.6394	3	3	3	0.4692	-4.00	-1.5017	959	-3.00	0
FBgn0010830	FBtr0078535	0.2137	2	2	2	0.5094	-5.90	-0.4451	212	-9.50	0
FBgn0010877	FBtr0083595	1.6840	5	5	5	0.4534	-6.30	-0.2669	761	-5.00	0
FBgn0010894	FBtr0077136	5.0083	0	0	0	0.4660	-5.00	-0.6984	103	-5.20	0
FBgn0010905	FBtr0304618	0.0445	5	5	2	0.4410	-4.10	1.3428	669	-6.30	0
FBgn0010909	FBtr0072958	0.3486	1	1	1	0.4628	-0.30	4.6558	188	-10.10	0
FBgn0010926	FBtr0083504	0.2156	1	1	1	0.4100	-4.40	3.3067	100	-11.00	0
FBgn0011016	FBtr0075453	3.2208	0	0	0	0.4639	-1.20	3.6509	97	-4.90	0
FBgn0011020	FBtr0081569	0.4623	0	0	0	0.3415	NA	0.5149	41	NA	0
FBgn0011202	FBtr0081410	1.0728	3	3	3	0.4511	-0.50	0.5593	521	-7.60	0
FBgn0011204	FBtr0072706	0.3336	0	0	0	0.4981	-10.50	2.1668	265	-4.20	0
FBgn0011205	FBtr0078189	0.2524	1	1	1	0.3654	-5.30	-1.5711	156	-4.80	0
FBgn0011206	FBtr0076541	1.7008	1	1	1	0.4697	-5.60	0.3715	628	-6.30	0
FBgn0011207	FBtr0079847	0.2648	2	2	2	0.5350	-1.70	-0.7012	243	-2.30	0
FBgn0011211	FBtr0071883	6.4697	0	0	0	0.4381	-1.10	3.3256	105	-6.10	0
FBgn0011217	FBtr0336876	2.1384	0	0	0	0.4433	-0.60	2.4339	388	-3.20	0
FBgn0011224	FBtr0112864	1.6210	0	0	0	0.4286	-9.10	0.8724	364	-5.90	0
FBgn0011225	FBtr0084636	0.3094	0	0	0	0.5545	-7.50	2.9887	101	-12.10	0
FBgn0011227	FBtr0087861	2.6967	0	0	0	0.4100	-0.84	3.2164	100	-5.60	0
FBgn0011230	FBtr0079545	1.7019	0	0	0	0.3966	-1.80	1.8581	58	-9.60	0
FBgn0011232	FBtr0079809	0.2317	4	4	4	0.4725	-6.40	-2.6607	309	-2.10	0
FBgn0011236	FBtr0072129	0.3413	4	4	4	0.4341	-3.80	-1.2075	599	-8.50	0
FBgn0011241	FBtr0088453	1.0434	1	1	0	0.3333	-1.00	3.8950	93	-3.00	0
FBgn0011259	FBtr0329930	0.0875	2	2	2	0.3732	-2.00	2.3441	1396	-7.80	0
FBgn0011260	FBtr0345339	4.6965	1	1	1	0.4684	-6.70	1.0433	237	-2.70	0
FBgn0011272	FBtr0100164	0.1877	0	0	0	0.4043	-4.00	3.0846	47	-5.30	0
FBgn0011284	FBtr0346390	0.1240	0	0	0	0.5268	-7.20	3.1550	112	-6.80	0
FBgn0011289	FBtr0085155	0.5072	0	0	0	0.5291	-7.00	0.8610	172	-12.40	0
FBgn0011290	FBtr0082440	0.7699	0	0	0	0.4110	0.00	1.3703	309	-8.20	0
FBgn0011291	FBtr0079924	1.0866	1	1	1	0.3523	-1.30	-0.3952	88	-6.30	0
FBgn0011297	FBtr0072095	0.4024	0	0	0	0.3797	-0.50	2.8759	79	-6.70	0
FBgn0011300	FBtr0088659	0.1291	3	3	2	0.5371	-12.80	2.9878	633	-4.40	0
FBgn0011305	FBtr0333411	2.5690	0	0	0	0.3824	-3.00	-0.4789	136	-2.50	0
FBgn0011327	FBtr0076472	2.1939	0	0	0	0.3729	-4.20	2.5481	118	-9.70	0
FBgn0011335	FBtr0075991	0.1758	0	0	0	0.3740	-6.00	0.4297	131	-8.40	0
FBgn0011336	FBtr0084786	1.9967	1	1	1	0.4096	-5.40	0.0714	83	-9.20	0
FBgn0011361	FBtr0072676	2.6499	0	0	0	0.4312	-2.40	1.5297	109	-3.80	0
FBgn0011455	FBtr0076023	1.8599	0	0	0	0.3825	-1.50	2.7889	183	-2.60	0
FBgn0011474	FBtr0082930	0.6971	5	5	5	0.4771	-2.70	-1.1217	371	-5.50	0
FBgn0011476	FBtr0334696	0.8216	3	3	3	0.3782	-1.20	1.0336	119	-6.00	0
FBgn0011481	FBtr0083611	0.5884	11	11	11	0.4131	0.00	4.0480	1501	-4.10	0
FBgn0011509	FBtr0333891	1.1412	0	0	0	0.4390	-3.60	2.8696	82	-12.50	0
FBgn0011566	FBtr0070447	0.6859	2	2	2	0.4163	-10.10	2.9202	209	-4.80	0
FBgn0011570	FBtr0331630	3.0345	0	0	0	0.4830	-12.50	-2.6412	147	-4.40	0
FBgn0011571	FBtr0074217	0.5593	0	0	0	0.3404	0.00	3.1812	141	-3.60	0
FBgn0011573	FBtr0072777	2.0246	0	0	0	0.3961	0.00	4.2987	308	-6.20	0
FBgn0011584	FBtr0079931	1.5433	2	2	2	0.3917	-1.50	2.2310	120	-5.30	0
FBgn0011586	FBtr0071267	0.5662	0	0	0	0.4110	-5.80	2.4716	146	-0.70	0
FBgn0011592	FBtr0087822	0.3730	2	2	2	0.4288	-3.50	0.4939	674	-5.50	0
FBgn0011604	FBtr0087842	1.6952	0	0	0	0.4277	0.00	1.3750	166	-7.80	0
FBgn0011606	FBtr0070448	1.3794	1	1	1	0.4263	-5.00	1.0830	373	-2.70	0
FBgn0011638	FBtr0081374	0.3822	0	0	0	0.4091	-3.60	2.8427	88	-5.90	0
FBgn0011640	FBtr0076841	1.2255	0	0	0	0.4986	-17.00	0.2839	355	-4.30	0
FBgn0011642	FBtr0089210	1.7837	2	2	2	0.2885	-5.70	-1.3192	208	-6.50	0
FBgn0011648	FBtr0077616	1.2801	4	4	4	0.4635	-1.60	2.5518	356	-5.80	0
FBgn0011655	FBtr0337030	0.5297	4	4	4	0.5354	-13.30	-1.2817	635	-7.90	0
FBgn0011656	FBtr0330708	0.1569	7	7	6	0.4903	-7.50	-0.1360	1134	-7.10	0
FBgn0011659	FBtr0088790	0.2968	0	0	0	0.6316	NA	0.8727	19	NA	NA
FBgn0011660	FBtr0087388	0.6773	0	0	0	0.3947	-9.50	-0.0819	76	-1.80	0
FBgn0011661	FBtr0071274	1.2696	1	1	1	0.3516	-4.80	4.0480	256	-6.40	0
FBgn0011666	FBtr0084882	2.7818	1	1	1	0.3517	-2.90	0.0960	489	-2.30	0
FBgn0011672	FBtr0089521	1.0471	0	0	0	0.4912	-7.80	0.9661	57	-5.30	0
FBgn0011674	FBtr0071562	0.4247	0	0	0	0.4765	-3.60	-0.3943	361	-6.00	0
FBgn0011692	FBtr0073227	0.1311	0	0	0	0.4306	-2.70	3.1927	144	-11.50	0
FBgn0011695	FBtr0072164	9.4955	0	0	0	0.5000	-1.20	2.7397	82	-5.40	0
FBgn0011703	FBtr0080059	2.2007	0	0	0	0.4154	-0.90	2.5528	65	-6.70	0
FBgn0011704	FBtr0088046	3.0452	0	0	0	0.3858	-0.10	-0.5861	127	0.00	0
FBgn0011705	FBtr0079782	0.2508	0	0	0	0.3724	0.00	1.4958	145	-6.00	0
FBgn0011708	FBtr0080831	0.8484	2	2	2	0.4344	-2.50	-0.3008	221	-0.10	0
FBgn0011710	FBtr0077198	0.6954	0	0	0	0.4333	-2.10	2.8533	90	-6.40	0
FBgn0011715	FBtr0078682	0.5049	1	1	1	0.4436	-1.70	3.1752	133	-7.00	0
FBgn0011725	FBtr0084568	0.9478	0	0	0	0.4335	-6.10	-1.2389	346	-3.70	0
FBgn0011726	FBtr0072188	2.3062	0	0	0	0.3942	-2.70	3.5420	137	-7.20	0
FBgn0011737	FBtr0332329	0.2856	0	0	0	0.3934	-6.90	2.9489	211	-5.00	0
FBgn0011739	FBtr0085720	0.3415	14	13	8	0.4282	-8.90	0.7987	1135	-7.20	0
FBgn0011740	FBtr0082031	0.0855	1	1	1	0.4178	-2.90	1.5687	146	-3.20	0
FBgn0011741	FBtr0074203	0.2154	1	1	1	0.3908	-4.90	1.0131	87	-10.10	0
FBgn0011742	FBtr0310673	0.2591	2	2	2	0.4536	-3.50	1.1009	560	-5.10	0
FBgn0011745	FBtr0082652	1.2007	0	0	0	0.3544	-0.30	3.8539	79	-6.30	0
FBgn0011747	FBtr0089173	1.1952	0	0	0	0.1538	NA	-0.2741	26	NA	NA
FBgn0011754	FBtr0343648	0.1154	1	1	1	0.4834	-11.50	-2.0511	511	-5.50	0
FBgn0011760	FBtr0070706	1.9830	0	0	0	0.4233	-0.30	3.6902	215	-4.00	0
FBgn0011761	FBtr0070749	7.8402	0	0	0	0.3774	-2.20	4.2806	106	-2.90	0
FBgn0011762	FBtr0076603	1.4287	0	0	0	0.3385	-2.70	1.5390	195	-5.10	0
FBgn0011763	FBtr0087741	0.4203	0	0	0	0.4667	-7.30	-3.5736	90	-5.80	0
FBgn0011764	FBtr0339766	0.9742	0	0	0	0.4132	-7.10	-0.9025	121	-2.60	0
FBgn0011766	FBtr0345217	0.0896	2	2	1	0.4652	-8.50	2.3622	503	-10.30	0
FBgn0011768	FBtr0082290	2.1464	0	0	0	0.4340	-1.80	2.1514	106	0.00	0
FBgn0011769	FBtr0303475	0.3588	0	0	0	0.3542	-4.30	3.6728	48	-5.80	0
FBgn0011770	FBtr0071472	1.3828	0	0	0	0.4636	-9.20	0.9632	110	-2.60	0
FBgn0011771	FBtr0078510	0.6153	1	1	1	0.4952	-4.20	-0.5059	208	-1.40	0
FBgn0011774	FBtr0334308	0.5922	0	0	0	0.4396	-8.50	1.3789	91	-4.40	0
FBgn0011785	FBtr0084604	0.3760	2	2	2	0.4174	-6.30	1.6880	115	-9.00	0
FBgn0011787	FBtr0076511	1.2990	0	0	0	0.4400	-0.10	1.0777	100	-9.60	0
FBgn0011802	FBtr0334100	0.9025	0	0	0	0.3200	-5.00	2.1681	75	-1.20	0
FBgn0011817	FBtr0076758	0.0715	4	3	2	0.4668	-5.00	-1.3967	1054	-5.80	0
FBgn0011818	FBtr0077778	1.3406	0	0	0	0.4000	-5.20	2.0239	75	-4.20	0
FBgn0011824	FBtr0071639	0.3221	0	0	0	0.3378	-5.80	2.8388	74	-7.60	0
FBgn0011826	FBtr0074294	0.8279	1	1	1	0.5057	-0.10	1.6731	609	0.00	0
FBgn0011836	FBtr0076361	0.3025	0	0	0	0.3684	-5.30	0.0604	114	-5.00	0
FBgn0011837	FBtr0333756	0.4485	1	1	1	0.3594	-0.50	4.0480	384	-7.80	0
FBgn0012034	FBtr0333126	0.1836	2	2	1	0.3776	0.00	3.6466	196	-3.80	0
FBgn0012036	FBtr0332597	2.1038	0	0	0	0.4163	-2.60	3.2994	209	-8.00	0
FBgn0012051	FBtr0086529	1.2041	0	0	0	0.4222	-10.00	1.8142	45	-5.30	0
FBgn0012058	FBtr0333369	0.6201	5	5	5	0.4689	-2.30	1.0921	659	-12.60	0
FBgn0013263	FBtr0100444	0.3482	0	0	0	0.4828	-4.00	-4.3627	290	-6.30	0
FBgn0013269	FBtr0083120	0.5265	0	0	0	0.4000	-2.70	2.1802	105	-3.90	0
FBgn0013272	FBtr0071813	33.4639	0	0	0	0.4405	-5.50	2.5493	168	-7.50	0
FBgn0013303	FBtr0074902	0.6422	4	4	4	0.3607	-1.60	2.9489	244	-1.20	0
FBgn0013305	FBtr0089876	2.6494	0	0	0	0.3023	0.00	1.9659	129	-4.50	0
FBgn0013325	FBtr0340533	0.4786	0	0	0	0.4545	-6.00	3.7057	77	-2.70	0
FBgn0013334	FBtr0083204	2.3427	3	3	3	0.4767	-1.90	2.9878	1007	-10.00	1
FBgn0013343	FBtr0392904	0.4848	5	5	2	0.4288	-0.70	2.7615	1320	-5.40	0
FBgn0013347	FBtr0084526	2.0115	0	0	0	0.4095	-6.00	0.8262	105	-4.00	0
FBgn0013432	FBtr0070431	1.3736	0	0	0	0.4880	-3.60	0.8540	166	-8.80	0
FBgn0013435	FBtr0088429	0.8256	1	1	1	0.2353	-1.40	0.0580	68	-3.40	0
FBgn0013531	FBtr0079544	2.6244	0	0	0	0.3448	-0.50	0.9697	87	-5.00	0
FBgn0013548	FBtr0072085	0.1259	1	1	1	0.4620	-4.70	2.6483	158	-3.70	0
FBgn0013563	FBtr0075777	0.2091	1	1	1	0.4342	-5.80	0.5976	76	-2.00	0
FBgn0013576	FBtr0273430	2.3794	2	2	2	0.4513	-9.70	-2.4153	308	-3.10	0
FBgn0013672	FBtr0100867	0.1583	0	0	0	NA	NA	NA		NA	NA
FBgn0013674	FBtr0100861	0.0426	0	0	0	NA	NA	NA		NA	NA
FBgn0013676	FBtr0100868	0.0693	0	0	0	NA	NA	NA		NA	NA
FBgn0013678	FBtr0100884	0.0541	0	0	0	NA	NA	NA		NA	NA
FBgn0013679	FBtr0100886	0.0836	0	0	0	NA	NA	NA		NA	NA
FBgn0013680	FBtr0100857	0.4070	0	0	0	NA	NA	NA		NA	NA
FBgn0013681	FBtr0100870	0.0297	0	0	0	NA	NA	NA		NA	NA
FBgn0013683	FBtr0100880	0.7432	0	0	0	NA	NA	NA		NA	NA
FBgn0013684	FBtr0100877	0.1212	0	0	0	NA	NA	NA		NA	NA
FBgn0013717	FBtr0346438	0.3617	4	4	4	0.5408	-12.20	-0.2291	638	-11.90	0
FBgn0013718	FBtr0100040	0.5816	4	4	4	0.3922	-3.80	2.8000	742	-8.80	0
FBgn0013720	FBtr0070256	1.8935	0	0	0	0.5182	-8.30	0.5829	137	-5.20	0
FBgn0013726	FBtr0088793	1.5884	1	1	1	0.4755	-6.20	-1.4163	204	-6.40	0
FBgn0013732	FBtr0086110	0.8420	1	1	1	0.4785	-0.30	2.7141	186	-3.80	0
FBgn0013733	FBtr0087617	0.2773	0	0	0	0.5609	-9.50	1.7358	501	-6.30	0
FBgn0013746	FBtr0343095	2.4675	0	0	0	0.3276	-1.70	1.5833	116	-6.40	0
FBgn0013749	FBtr0089192	2.8891	0	0	0	0.2857	-2.10	3.1812	98	-1.90	0
FBgn0013750	FBtr0087378	0.2003	4	4	3	0.4855	-4.90	2.6724	276	-6.80	0
FBgn0013753	FBtr0072758	0.8276	0	0	0	0.4577	-6.00	2.5395	284	-5.30	0
FBgn0013756	FBtr0332464	0.6200	0	0	0	0.3741	-5.40	2.1258	139	-5.00	0
FBgn0013759	FBtr0084161	0.1053	4	4	4	0.4333	-3.60	3.9293	510	-2.70	0
FBgn0013762	FBtr0087350	1.5365	0	0	0	0.4261	0.00	3.3394	115	-10.40	0
FBgn0013763	FBtr0087111	3.6552	0	0	0	0.4783	-3.60	2.3644	69	-5.40	0
FBgn0013764	FBtr0072191	0.6137	4	4	4	0.4038	-3.30	-0.2100	156	-6.40	0
FBgn0013765	FBtr0087703	2.1408	0	0	0	0.3846	-2.50	-2.5674	117	-6.70	0
FBgn0013770	FBtr0087592	8.3235	0	0	0	0.3818	-6.20	2.7725	220	-4.40	0
FBgn0013771	FBtr0300128	9.2355	0	0	0	0.4565	-4.20	-1.1002	46	-2.00	0
FBgn0013773	FBtr0345526	0.0696	1	1	1	0.4783	-4.40	-1.3726	115	-8.60	0
FBgn0013799	FBtr0332153	0.1237	5	5	4	0.4127	-1.90	0.3366	361	-5.40	0
FBgn0013953	FBtr0084703	13.8516	0	0	0	0.4890	-3.90	2.0094	227	-10.90	0
FBgn0013954	FBtr0086515	9.1290	0	0	0	0.4375	-2.60	3.2773	80	-5.30	0
FBgn0013981	FBtr0334029	10.5108	0	0	0	0.3654	-2.30	1.8185	52	-4.30	0
FBgn0013983	FBtr0086725	0.9355	0	0	0	0.4590	-3.10	0.9843	122	-1.60	0
FBgn0013984	FBtr0084121	0.1842	7	7	6	0.3927	-1.90	1.0487	1128	-4.60	0
FBgn0013987	FBtr0308577	1.4045	0	0	0	0.4400	NA	1.2191	25	NA	NA
FBgn0013995	FBtr0309204	0.0774	0	0	0	0.5191	-3.80	-0.4618	393	-3.30	0
FBgn0013997	FBtr0075999	4.0274	1	1	1	0.4256	-1.50	2.7397	336	-11.20	0
FBgn0014002	FBtr0075648	1.6925	0	0	0	0.4676	-1.10	1.2456	139	-7.50	0
FBgn0014006	FBtr0300256	0.5136	3	3	3	0.4585	-5.90	0.7884	205	-0.70	0
FBgn0014007	FBtr0075913	0.4979	1	1	1	0.3750	-3.80	0.4738	208	-4.50	0
FBgn0014009	FBtr0086124	2.6145	0	0	0	0.4345	-3.00	2.5734	145	-13.30	0
FBgn0014010	FBtr0077797	2.0410	0	0	0	0.4591	-2.60	-0.0831	257	-8.40	0
FBgn0014011	FBtr0332800	1.8963	3	3	3	0.4044	-3.60	0.7587	680	-7.50	0
FBgn0014018	FBtr0089341	0.6010	1	1	1	0.4554	-11.20	2.6569	101	-9.00	0
FBgn0014020	FBtr0087211	3.4003	1	1	1	0.3801	-3.70	-2.1683	271	-12.90	0
FBgn0014022	FBtr0082062	1.0122	0	0	0	0.3889	NA	1.8495	36	NA	NA
FBgn0014023	FBtr0082121	1.6267	0	0	0	0.3571	-6.70	3.2912	42	-6.70	0
FBgn0014024	FBtr0340477	0.1449	0	0	0	0.3902	-9.40	0.7699	82	-8.30	0
FBgn0014026	FBtr0343329	0.4294	0	0	0	0.4118	-4.10	2.8388	85	-7.30	0
FBgn0014028	FBtr0086156	0.9330	0	0	0	0.4264	-6.10	2.6517	129	-7.80	0
FBgn0014029	FBtr0083945	0.5633	0	0	0	0.4706	-1.30	1.9237	85	-6.60	0
FBgn0014032	FBtr0071241	2.5734	0	0	0	0.4470	-4.20	1.3322	132	-8.30	0
FBgn0014037	FBtr0074920	0.2005	3	3	3	0.4371	-7.10	-1.6325	993	-10.20	0
FBgn0014075	FBtr0075064	2.0242	1	1	1	0.4089	-6.50	1.6649	203	-5.50	0
FBgn0014076	FBtr0343618	18.0971	0	0	0	0.3226	NA	0.7587	31	NA	NA
FBgn0014092	FBtr0080834	2.4993	0	0	0	0.4091	-3.10	-0.9134	88	-6.40	0
FBgn0014127	FBtr0081348	1.7655	0	0	0	0.3333	-2.50	2.3407	150	-6.10	0
FBgn0014133	FBtr0073526	0.2520	3	3	2	0.4863	-4.10	0.6588	329	-4.70	0
FBgn0014141	FBtr0089471	1.4724	0	0	0	0.4941	-7.30	0.7236	421	-5.70	0
FBgn0014163	FBtr0100477	0.4189	1	1	1	0.4563	0.00	3.2773	366	-5.20	0
FBgn0014184	FBtr0088015	3.3533	0	0	0	0.3966	-2.40	2.0246	58	-2.90	0
FBgn0014189	FBtr0079125	1.0474	0	0	0	0.3896	-2.30	2.4943	77	-4.10	0
FBgn0014269	FBtr0086601	0.7728	0	0	0	0.4960	-4.30	-2.3307	125	-7.60	0
FBgn0014340	FBtr0070829	0.7153	0	0	0	0.3762	-5.60	0.9164	101	-4.10	0
FBgn0014342	FBtr0089313	3.2533	0	0	0	0.4167	NA	3.6902	12	NA	NA
FBgn0014366	FBtr0078751	0.5232	1	1	1	0.3937	-2.20	0.9186	127	-6.60	0
FBgn0014380	FBtr0082124	4.9295	0	0	0	0.4756	-5.00	-1.3045	246	-8.40	0
FBgn0014391	FBtr0074177	4.0495	0	0	0	0.3511	-2.90	3.4024	94	-4.10	0
FBgn0014411	FBtr0070311	0.9732	0	0	0	0.4702	-4.80	-0.2504	285	-8.70	0
FBgn0014417	FBtr0331991	1.1013	0	0	0	0.5312	-1.40	1.2041	64	-10.10	0
FBgn0014427	FBtr0085390	1.1419	0	0	0	0.4627	-2.00	1.8993	67	-4.50	0
FBgn0014455	FBtr0346181	0.3601	0	0	0	0.4923	-0.90	1.2608	130	-8.20	0
FBgn0014469	FBtr0088745	8.0319	0	0	0	0.5333	-14.00	2.2547	60	-7.80	0
FBgn0014857	FBtr0333536	3.1236	0	0	0	0.4320	-1.10	1.7462	125	-5.80	0
FBgn0014861	FBtr0081827	1.1200	0	0	0	0.4809	0.00	0.6369	131	-6.10	0
FBgn0014868	FBtr0071344	2.2793	0	0	0	0.3690	-6.50	2.4896	84	-2.80	0
FBgn0014869	FBtr0100482	2.2489	0	0	0	0.4773	-2.00	2.8427	88	-9.50	0
FBgn0014870	FBtr0087074	2.0567	3	3	3	0.3502	0.00	0.7301	317	-2.70	0
FBgn0014877	FBtr0087675	0.7214	0	0	0	0.3750	-1.60	1.9024	104	-3.70	0
FBgn0014879	FBtr0083062	0.9199	0	0	0	0.4593	-6.30	1.2896	135	-2.50	0
FBgn0014906	FBtr0308315	1.0163	1	1	1	0.4982	-3.60	2.0639	275	-7.50	0
FBgn0014930	FBtr0081763	0.7828	6	6	6	0.4729	-6.80	0.1438	277	-5.00	0
FBgn0014931	FBtr0304703	1.2735	5	5	5	0.3176	-0.90	-1.8881	233	-2.70	0
FBgn0015000	FBtr0078991	0.2235	1	1	1	0.4000	-1.60	0.9122	105	-5.60	0
FBgn0015019	FBtr0083337	1.4777	0	0	0	0.4052	-2.60	2.2020	153	-4.50	0
FBgn0015024	FBtr0073680	1.1833	1	1	1	0.4128	-9.20	1.0304	436	-7.10	0
FBgn0015025	FBtr0075504	0.1655	0	0	0	0.3333	-4.00	3.9693	69	-2.70	0
FBgn0015031	FBtr0307035	3.2839	0	0	0	0.3125	-3.50	2.5749	64	-1.90	0
FBgn0015036	FBtr0070388	1.2750	0	0	0	0.4778	-5.20	2.9985	90	-7.90	0
FBgn0015075	FBtr0078492	1.7663	0	0	0	0.3860	-7.00	3.5743	114	-4.10	0
FBgn0015218	FBtr0076491	1.2818	0	0	0	0.4785	-2.00	2.5864	326	-4.10	0
FBgn0015221	FBtr0332168	9.5903	0	0	0	0.3765	-1.40	1.8640	85	-4.60	0
FBgn0015222	FBtr0085632	7.8859	0	0	0	0.4434	-2.90	2.6938	106	-3.10	0
FBgn0015229	FBtr0084157	0.2590	2	2	2	0.4150	-1.30	0.7178	347	-6.40	0
FBgn0015239	FBtr0078392	0.1528	2	2	2	0.3929	-10.70	1.9042	252	-5.30	0
FBgn0015240	FBtr0084756	0.0576	2	2	2	0.5372	-3.40	2.3378	309	-4.20	0
FBgn0015245	FBtr0073434	0.2622	0	0	0	0.4342	-2.90	2.7768	152	-7.10	0
FBgn0015247	FBtr0087296	0.0776	0	0	0	0.3946	-11.00	1.8312	147	-3.10	0
FBgn0015268	FBtr0072219	0.1275	0	0	0	0.4679	-4.70	2.6024	109	-5.80	0
FBgn0015269	FBtr0100113	1.9094	2	2	2	0.4014	-0.50	3.1130	279	-2.60	0
FBgn0015270	FBtr0082866	1.0138	0	0	0	0.4615	-13.40	0.0500	65	-4.30	0
FBgn0015271	FBtr0080543	1.2787	0	0	0	0.3700	-9.40	0.0119	200	-5.20	0
FBgn0015277	FBtr0072064	0.3801	0	0	0	0.4444	-2.60	2.8787	81	-15.30	0
FBgn0015278	FBtr0301816	0.4444	0	0	0	0.4904	-3.00	0.1009	157	-2.70	0
FBgn0015279	FBtr0083940	0.5454	3	3	3	0.4312	-1.70	0.0319	378	-8.10	0
FBgn0015282	FBtr0084520	2.8079	1	1	1	0.4167	-2.20	4.2244	108	-2.90	0
FBgn0015283	FBtr0333453	4.3029	0	0	0	0.4043	-2.50	3.2097	47	-3.30	0
FBgn0015286	FBtr0070583	0.9023	3	3	3	0.4355	-13.80	1.3780	496	-0.80	0
FBgn0015288	FBtr0070148	0.2470	0	0	0	0.4286	NA	3.0609	35	NA	NA
FBgn0015295	FBtr0087244	0.1484	1	1	1	0.4386	-3.40	3.1729	57	0.00	0
FBgn0015296	FBtr0076458	0.4309	0	0	0	0.5113	-5.00	-0.4997	133	-3.10	0
FBgn0015298	FBtr0076879	1.0434	0	0	0	0.3805	-4.50	1.7950	113	-10.80	0
FBgn0015299	FBtr0079590	3.6650	0	0	0	0.3434	-3.60	3.3212	99	-6.60	0
FBgn0015320	FBtr0080115	1.0687	0	0	0	0.5099	-2.10	2.9444	304	-3.50	0
FBgn0015321	FBtr0345604	2.7450	0	0	0	0.4678	-3.80	2.0652	357	-4.80	0
FBgn0015324	FBtr0078700	3.4794	0	0	0	0.3862	-1.90	4.2743	145	-5.70	0
FBgn0015331	FBtr0078967	1.0391	1	1	1	0.3659	0.00	-1.0420	82	-7.70	0
FBgn0015338	FBtr0080850	1.1371	0	0	0	0.2993	0.00	2.8566	284	-4.30	0
FBgn0015351	FBtr0336486	0.9040	0	0	0	0.2812	NA	0.8761	32	NA	NA
FBgn0015359	FBtr0072877	1.4693	1	1	1	0.4054	-0.50	3.6466	111	-7.60	0
FBgn0015360	FBtr0072904	0.0494	3	3	3	0.5444	-7.00	0.5236	259	-8.20	0
FBgn0015371	FBtr0087415	0.5842	1	1	1	0.4524	-7.40	0.1697	473	-3.20	0
FBgn0015372	FBtr0072120	0.9071	1	1	1	0.4665	-8.90	0.4158	343	-1.70	0
FBgn0015376	FBtr0077541	1.0483	1	1	1	0.3615	-1.60	0.6355	130	-10.20	0
FBgn0015379	FBtr0077193	2.4184	0	0	0	0.3763	-1.20	0.8901	93	-6.80	0
FBgn0015391	FBtr0080935	0.2369	0	0	0	0.4414	-2.80	0.4998	111	-5.30	0
FBgn0015393	FBtr0079846	0.5844	0	0	0	0.3774	-2.20	1.9787	106	-5.40	0
FBgn0015396	FBtr0082237	0.1705	1	1	1	0.4422	0.00	2.9985	346	-6.50	0
FBgn0015402	FBtr0078766	0.1069	2	2	1	0.5539	-4.50	0.7516	269	-9.20	0
FBgn0015477	FBtr0088618	0.4380	1	1	0	0.3526	-2.50	0.8024	173	-3.90	0
FBgn0015509	FBtr0088846	0.7357	1	1	1	0.4729	-7.00	1.8645	387	-5.40	0
FBgn0015513	FBtr0304729	0.3545	5	5	5	0.4470	-3.00	2.7658	575	-4.50	0
FBgn0015520	FBtr0333727	0.3543	0	0	0	0.3577	-4.50	-0.1515	123	-5.70	0
FBgn0015521	FBtr0335131	0.4821	0	0	0	0.3784	-3.30	3.2006	74	-4.60	0
FBgn0015522	FBtr0086799	0.4461	6	6	6	0.4052	-0.30	1.2040	733	-6.80	0
FBgn0015527	FBtr0077223	1.3128	0	0	0	0.4239	-8.50	2.7094	92	-7.20	0
FBgn0015544	FBtr0072256	2.5214	0	0	0	0.4138	-3.30	2.3864	87	-12.60	0
FBgn0015546	FBtr0080630	1.3242	1	1	1	0.3333	-1.40	2.5826	69	-11.80	0
FBgn0015553	FBtr0081131	0.3785	2	2	2	0.3419	-0.10	1.9022	117	-5.20	0
FBgn0015558	FBtr0329902	0.0951	0	0	0	0.4461	-9.30	1.0304	334	-4.40	0
FBgn0015568	FBtr0081544	0.0292	0	0	0	0.5269	-5.70	-0.1037	186	-12.40	0
FBgn0015569	FBtr0305911	0.0125	0	0	0	0.2295	-0.90	-1.6005	61	-2.00	0
FBgn0015571	FBtr0339708	0.8439	0	0	0	0.4783	NA	2.5073	23	NA	NA
FBgn0015582	FBtr0088176	0.4195	0	0	0	0.4204	-12.00	2.1451	157	-4.70	0
FBgn0015589	FBtr0085351	0.2558	1	1	1	0.5178	-4.00	-1.1289	253	-10.80	0
FBgn0015600	FBtr0077662	0.7255	3	3	3	0.3462	-0.40	-0.5687	439	-5.50	0
FBgn0015602	FBtr0087442	0.2343	0	0	0	0.3168	-2.10	2.9242	101	-0.80	0
FBgn0015614	FBtr0088930	0.9877	2	2	2	0.4453	-1.20	4.6296	256	-7.90	0
FBgn0015615	FBtr0074290	0.2657	1	1	1	0.2740	-9.60	1.0777	73	-3.20	0
FBgn0015618	FBtr0076369	2.0430	0	0	0	0.3692	-6.50	3.8990	65	-8.50	0
FBgn0015621	FBtr0078011	1.4935	0	0	0	0.4435	-2.10	1.3153	115	-0.70	0
FBgn0015622	FBtr0085438	0.2734	1	1	1	0.4777	-8.80	2.8543	224	-0.90	0
FBgn0015623	FBtr0079250	0.1438	0	0	0	0.5098	-4.20	3.0033	306	-7.90	0
FBgn0015625	FBtr0334578	1.4673	1	1	1	0.5000	-8.00	4.2587	288	-4.30	0
FBgn0015663	FBtr0339571	0.5853	1	1	1	0.4286	-11.20	1.1251	189	-5.70	0
FBgn0015664	FBtr0079889	0.3178	1	1	1	0.3837	0.00	2.7315	344	-4.00	0
FBgn0015737	FBtr0085164	0.2650	0	0	0	0.4472	-5.10	1.3166	161	-7.80	0
FBgn0015754	FBtr0087236	1.9133	1	1	1	0.3568	-2.80	0.2824	199	-5.20	0
FBgn0015756	FBtr0340226	0.2404	0	0	0	0.4824	-4.40	2.5330	85	-5.50	0
FBgn0015765	FBtr0084580	0.2443	3	3	3	0.4601	-3.80	1.0163	163	-3.60	0
FBgn0015772	FBtr0340325	0.9108	1	1	1	0.5015	-6.40	2.1678	329	-4.40	0
FBgn0015776	FBtr0079384	2.3004	1	1	1	0.4474	-4.20	1.3877	447	-10.90	0
FBgn0015778	FBtr0346347	1.5288	1	1	1	0.4397	-2.30	-0.7402	348	-2.50	0
FBgn0015781	FBtr0083713	1.1666	1	1	1	0.4202	-2.80	1.1270	238	-2.90	0
FBgn0015789	FBtr0077337	0.9480	0	0	0	0.4505	-7.40	1.4602	293	-0.40	0
FBgn0015790	FBtr0084011	1.6189	0	0	0	0.4409	-3.00	4.2987	220	-8.20	0
FBgn0015791	FBtr0080627	2.0659	0	0	0	0.4611	-10.80	2.7813	167	-5.80	0
FBgn0015793	FBtr0076705	0.3689	0	0	0	0.4505	-8.00	1.9857	91	-4.10	0
FBgn0015794	FBtr0070849	2.8115	0	0	0	0.3709	-2.60	2.9299	151	-4.30	0
FBgn0015795	FBtr0084503	5.2446	0	0	0	0.4180	-1.60	2.7193	189	-2.60	0
FBgn0015797	FBtr0346437	1.5598	0	0	0	0.4953	-2.20	1.1573	317	-1.70	0
FBgn0015799	FBtr0070146	0.1888	4	4	4	0.5317	-3.10	1.4626	694	-5.60	0
FBgn0015801	FBtr0072427	15.2580	1	1	1	0.5059	-6.90	2.2687	506	-6.80	0
FBgn0015803	FBtr0081356	0.2146	3	3	3	0.4173	-5.60	0.6192	508	-11.60	0
FBgn0015805	FBtr0073317	2.0272	0	0	0	0.4903	-4.30	2.5873	206	-8.00	0
FBgn0015806	FBtr0077114	0.7547	1	1	1	0.5217	-0.40	1.5513	531	-7.20	0
FBgn0015808	FBtr0081109	1.3267	0	0	0	0.3982	-4.40	3.3437	113	-0.10	0
FBgn0015818	FBtr0070894	0.6496	1	1	1	0.3483	-4.90	2.8540	89	-9.70	0
FBgn0015828	FBtr0076108	0.0547	2	2	2	0.4796	-6.50	2.3720	196	-8.90	0
FBgn0015829	FBtr0073234	2.2167	0	0	0	0.3482	-3.60	2.8802	112	-11.10	0
FBgn0015834	FBtr0079053	0.6862	1	1	1	0.3659	-0.30	3.2495	82	-6.30	0
FBgn0015838	FBtr0088566	0.1145	1	1	1	0.5000	-14.70	0.9479	338	-15.40	0
FBgn0015872	FBtr0331389	18.5703	0	0	0	0.3333	NA	1.5899	30	NA	NA
FBgn0015903	FBtr0072066	0.3282	0	0	0	0.4532	-8.00	-2.9707	139	-6.50	0
FBgn0015905	FBtr0077952	0.2217	0	0	0	0.3793	-4.00	2.4972	87	-5.50	0
FBgn0015924	FBtr0078087	1.1253	4	4	4	0.4229	-2.50	2.0483	532	-6.10	0
FBgn0015925	FBtr0089872	0.2023	0	0	0	0.5158	-2.40	2.0335	95	-4.10	0
FBgn0015926	FBtr0074007	0.2593	0	0	0	0.3922	-1.70	3.2651	102	-5.00	0
FBgn0015929	FBtr0088982	1.7613	0	0	0	0.4369	-4.90	1.2495	103	-3.10	0
FBgn0015949	FBtr0086483	0.5134	6	6	6	0.4499	-2.40	2.9641	749	-4.10	0
FBgn0016031	FBtr0077160	0.2467	5	5	5	0.4513	-3.90	2.4353	1192	-7.30	0
FBgn0016034	FBtr0089632	0.5941	0	0	0	0.4505	-0.80	2.7355	333	-2.40	0
FBgn0016036	FBtr0076836	0.4222	0	0	0	NA	NA	NA		NA	NA
FBgn0016038	FBtr0089723	2.0261	0	0	0	0.3294	-2.50	1.7809	85	0.00	0
FBgn0016041	FBtr0333748	1.1394	0	0	0	0.3791	-2.90	2.8802	422	-4.10	0
FBgn0016053	FBtr0112519	0.8161	0	0	0	0.3478	-4.90	1.8997	69	-7.30	0
FBgn0016054	FBtr0336830	0.0639	0	0	0	0.4722	-13.00	4.2481	72	-6.90	0
FBgn0016059	FBtr0086890	1.5034	6	6	6	0.4577	-4.20	1.9151	485	-4.80	0
FBgn0016070	FBtr0290104	0.0451	0	0	0	0.4161	0.00	1.7345	286	-0.30	0
FBgn0016076	FBtr0346579	8.9352	0	0	0	0.4480	-2.40	0.2696	375	-10.40	0
FBgn0016078	FBtr0088553	1.4357	0	0	0	0.4932	-2.10	3.0295	219	-7.70	0
FBgn0016080	FBtr0074405	0.1420	0	0	0	0.3214	-4.70	1.4499	112	-2.50	0
FBgn0016081	FBtr0306241	1.3693	2	2	2	0.3574	-2.30	0.9479	277	-1.70	0
FBgn0016119	FBtr0333777	4.6518	0	0	0	0.3929	-5.40	1.0777	84	-3.40	0
FBgn0016120	FBtr0346155	2.4992	0	0	0	0.3563	-2.20	1.8475	87	-3.60	0
FBgn0016122	FBtr0079685	2.6478	0	0	0	0.4841	-10.70	0.9603	345	-9.30	0
FBgn0016123	FBtr0085733	9.9588	1	1	1	0.5043	-1.70	1.5856	234	-5.80	0
FBgn0016126	FBtr0089067	0.4647	4	4	4	0.3626	0.00	1.5456	273	-4.00	0
FBgn0016131	FBtr0340063	0.3017	0	0	0	0.4250	-5.10	0.0951	80	-5.20	0
FBgn0016641	FBtr0071686	0.0666	4	4	4	0.5024	-7.80	-0.0444	209	-4.80	0
FBgn0016672	FBtr0082865	0.0162	2	2	2	0.4211	-7.10	1.0589	133	-2.40	0
FBgn0016685	FBtr0334701	0.8424	0	0	0	0.3735	-4.20	0.8459	83	-3.50	0
FBgn0016687	FBtr0273253	1.3920	0	0	0	0.5036	-0.50	1.3118	137	-3.50	0
FBgn0016691	FBtr0083063	2.6681	0	0	0	0.4286	-7.90	2.1432	70	-3.50	0
FBgn0016693	FBtr0082655	0.5110	0	0	0	0.5179	-4.50	1.2628	280	-4.70	0
FBgn0016694	FBtr0076775	3.2998	0	0	0	0.4767	-7.10	-0.1357	86	-8.50	0
FBgn0016696	FBtr0078247	0.3831	1	1	1	0.4669	-10.50	2.4576	272	-1.10	0
FBgn0016697	FBtr0086910	2.4876	0	0	0	0.4096	-2.50	1.6933	83	-3.10	0
FBgn0016698	FBtr0077589	1.7692	1	1	1	0.3299	-4.10	1.3859	97	-0.60	0
FBgn0016700	FBtr0084104	2.7214	1	1	1	0.4120	-5.80	1.8760	267	-1.40	0
FBgn0016701	FBtr0086830	2.1473	0	0	0	0.4304	0.00	2.7488	237	-11.50	0
FBgn0016726	FBtr0071592	0.6557	0	0	0	0.4340	-5.20	1.6898	53	-4.70	0
FBgn0016754	FBtr0308564	0.1545	0	0	0	0.4839	-9.10	1.6509	124	0.00	0
FBgn0016756	FBtr0077095	0.4431	1	1	1	0.5298	-4.10	0.0735	302	-6.70	0
FBgn0016762	FBtr0072083	0.1633	1	1	1	0.5217	-13.80	-0.5882	115	-3.70	0
FBgn0016794	FBtr0072926	0.9786	0	0	0	0.4932	-3.90	2.3923	73	-10.20	0
FBgn0016797	FBtr0112890	1.3262	3	3	3	0.4466	-3.80	3.5245	1059	-7.30	0
FBgn0016917	FBtr0334581	0.4625	1	1	1	0.5041	-10.10	-2.0503	484	-8.60	0
FBgn0016926	FBtr0077987	0.4911	0	0	0	0.3933	-7.90	2.7877	150	-7.00	0
FBgn0016930	FBtr0100448	1.2755	5	5	5	0.4047	-3.00	2.7425	761	-13.60	0
FBgn0016970	FBtr0088505	0.2110	0	0	0	0.2222	NA	4.6059	9	NA	NA
FBgn0016977	FBtr0078123	0.7206	7	7	7	0.4189	-3.40	0.3012	592	-4.40	0
FBgn0016978	FBtr0079355	0.3633	1	1	1	0.4235	-0.30	3.5245	196	-9.00	0
FBgn0016983	FBtr0076851	0.1995	1	1	1	0.4434	-2.50	0.9312	106	-12.90	0
FBgn0016984	FBtr0071563	0.3815	4	4	4	0.4666	-16.70	1.5002	658	-6.90	0
FBgn0017414	FBtr0331937	0.1994	1	1	1	0.4315	-2.30	1.3551	146	-3.90	0
FBgn0017418	FBtr0332850	0.2954	4	4	4	0.4555	-3.70	3.1714	595	-6.90	0
FBgn0017429	FBtr0076649	0.1378	0	0	0	0.4408	-8.10	0.2147	152	-2.00	0
FBgn0017430	FBtr0076650	0.9901	0	0	0	0.3162	-6.00	3.1752	136	-3.00	0
FBgn0017448	FBtr0303376	0.1936	0	0	0	0.5352	-2.20	1.1244	71	-3.60	0
FBgn0017457	FBtr0333408	1.1769	0	0	0	0.4569	-4.50	1.4916	197	-5.90	0
FBgn0017545	FBtr0089175	0.8827	0	0	0	0.4074	NA	2.1364	27	NA	NA
FBgn0017550	FBtr0078741	0.6252	6	6	5	0.4904	-3.50	-0.9895	1046	-5.40	0
FBgn0017551	FBtr0079342	1.9181	1	1	1	0.3925	-3.40	2.7813	107	-5.70	0
FBgn0017558	FBtr0306807	0.2662	2	2	2	0.4821	0.00	2.5864	811	-9.10	0
FBgn0017561	FBtr0073404	0.1828	2	2	1	0.4227	-7.40	-0.5018	511	-8.80	0
FBgn0017566	FBtr0071180	1.7571	0	0	0	0.3750	-3.70	1.5798	96	-6.00	0
FBgn0017567	FBtr0083191	1.4837	0	0	0	0.3409	-0.80	3.3149	88	-5.70	0
FBgn0017572	FBtr0331560	1.7913	0	0	0	0.4521	-2.10	1.9608	303	-2.40	0
FBgn0017577	FBtr0082279	2.0536	0	0	0	0.3830	0.00	4.6558	141	-7.30	0
FBgn0017578	FBtr0345391	3.0699	1	1	1	0.3396	-8.90	3.2670	159	-6.00	0
FBgn0017579	FBtr0076633	0.4045	0	0	0	0.4483	NA	-0.5799	29	NA	NA
FBgn0017581	FBtr0082535	0.1277	2	2	2	0.4220	-4.80	2.6126	519	-10.90	0
FBgn0019624	FBtr0334890	1.7146	0	0	0	0.4043	-1.70	2.5889	47	-1.70	0
FBgn0019637	FBtr0078704	0.5874	0	0	0	0.3942	-1.00	0.1388	104	-2.20	0
FBgn0019643	FBtr0072255	24.3904	0	0	0	0.4908	-3.30	3.2149	546	-11.40	0
FBgn0019644	FBtr0076405	1.1897	0	0	0	0.4058	-7.30	1.9237	69	-6.90	0
FBgn0019662	FBtr0302045	0.7280	0	0	0	0.5219	-1.70	3.3304	297	-5.30	0
FBgn0019686	FBtr0081329	0.2477	2	2	2	0.4483	-11.60	1.7918	319	-7.30	0
FBgn0019830	FBtr0077731	0.4143	4	4	4	0.4067	-5.70	0.5648	504	-1.40	0
FBgn0019886	FBtr0072348	1.3216	1	1	1	0.4716	-0.30	1.2954	352	-6.60	0
FBgn0019890	FBtr0080562	1.4311	0	0	0	0.4270	-0.90	2.2474	281	-2.40	0
FBgn0019925	FBtr0083117	2.4870	1	1	1	0.4608	-2.80	3.2164	217	-7.80	0
FBgn0019932	FBtr0079994	2.6415	0	0	0	0.4655	-5.70	0.9843	58	-4.20	0
FBgn0019936	FBtr0083964	0.4137	0	0	0	0.3778	-3.40	1.9953	90	-8.70	0
FBgn0019938	FBtr0087511	0.1656	0	0	0	0.4490	-3.70	3.9172	98	-6.20	0
FBgn0019947	FBtr0333479	0.5854	1	1	1	0.4747	-9.90	-2.9128	158	-5.80	0
FBgn0019948	FBtr0072203	1.4941	0	0	0	0.3791	-7.90	1.8950	153	-2.30	0
FBgn0019949	FBtr0071937	0.3435	0	0	0	0.4088	-4.00	2.2572	137	-6.10	0
FBgn0019957	FBtr0084172	1.6346	0	0	0	0.3973	-5.70	3.5198	73	-4.90	0
FBgn0019960	FBtr0335199	1.0447	0	0	0	0.5385	-2.00	2.4217	143	-5.80	0
FBgn0019968	FBtr0346265	0.3482	1	1	1	0.4826	-0.70	0.7665	344	-5.10	0
FBgn0019972	FBtr0085482	3.2132	0	0	0	0.4250	-7.60	0.8787	240	-4.70	0
FBgn0019982	FBtr0077453	0.5050	0	0	0	0.4774	-4.40	1.3596	155	-7.30	0
FBgn0019985	FBtr0089184	0.0732	1	1	1	0.3349	-0.30	2.7378	209	-7.30	0
FBgn0019990	FBtr0085787	0.3816	3	3	3	0.4381	-2.70	2.4943	331	-3.80	0
FBgn0020018	FBtr0084664	0.2161	1	1	1	0.4683	-5.00	0.9230	126	-5.30	0
FBgn0020224	FBtr0076614	0.2962	1	1	1	0.5155	-9.50	2.6857	355	-8.60	0
FBgn0020235	FBtr0085541	2.6451	0	0	0	0.4672	-5.00	0.3068	122	-12.30	0
FBgn0020236	FBtr0300597	0.5609	0	0	0	0.3818	-3.20	1.1601	110	-3.40	0
FBgn0020238	FBtr0083565	4.6742	0	0	0	0.4717	-6.30	3.3526	159	-5.30	0
FBgn0020248	FBtr0072713	0.0512	1	1	1	0.3706	-6.80	-4.5903	170	-5.30	0
FBgn0020249	FBtr0081844	0.8304	1	1	1	0.3582	-3.00	1.5679	134	-5.00	0
FBgn0020251	FBtr0301562	0.2653	6	6	6	0.4415	-2.50	1.9550	1273	-12.50	0
FBgn0020255	FBtr0340164	2.0487	0	0	0	0.3684	-3.30	0.7058	133	-1.80	0
FBgn0020261	FBtr0302082	0.6620	3	3	3	0.4848	-4.40	2.2178	198	-8.40	0
FBgn0020270	FBtr0080213	0.6690	1	1	1	0.3778	-0.20	1.9278	90	-10.70	0
FBgn0020272	FBtr0077211	0.3058	0	0	0	0.4571	NA	-2.3142	35	NA	NA
FBgn0020278	FBtr0084273	0.3778	2	2	2	0.4248	-4.30	0.3345	379	-4.70	0
FBgn0020279	FBtr0301915	1.4886	0	0	0	0.3810	-7.50	1.4091	63	-8.90	0
FBgn0020304	FBtr0302612	0.4755	0	0	0	0.5274	-7.30	1.9042	1003	-11.80	0
FBgn0020305	FBtr0078030	1.0254	0	0	0	0.4691	-1.30	1.4821	81	-10.30	0
FBgn0020306	FBtr0071604	0.1220	4	4	4	0.4167	-4.20	2.8256	204	-10.70	0
FBgn0020309	FBtr0335476	0.1848	9	7	6	0.4819	-5.20	1.2409	772	-4.70	0
FBgn0020312	FBtr0071637	0.0590	3	3	3	0.4574	-4.50	3.3955	223	-3.60	0
FBgn0020369	FBtr0077189	4.6456	0	0	0	0.3492	0.00	1.6785	126	-4.30	0
FBgn0020370	FBtr0087775	1.5235	0	0	0	0.4867	-2.40	1.0811	113	-4.60	0
FBgn0020379	FBtr0305995	0.4182	5	5	5	0.4238	-4.00	-0.0370	597	-2.60	0
FBgn0020381	FBtr0114560	0.5824	0	0	0	0.4194	-1.50	1.6509	62	-2.00	0
FBgn0020385	FBtr0082266	0.1028	0	0	0	0.6338	-9.30	3.1629	71	-13.50	0
FBgn0020386	FBtr0072470	0.2246	3	3	1	0.4444	-8.30	-2.5353	207	-10.20	0
FBgn0020388	FBtr0075969	1.2316	0	0	0	0.4054	-5.00	-1.4923	111	-10.60	0
FBgn0020389	FBtr0074887	0.2825	0	0	0	0.4131	-5.60	1.4635	213	-5.00	0
FBgn0020392	FBtr0076728	3.2026	0	0	0	0.3333	-6.70	0.5793	102	-6.00	0
FBgn0020407	FBtr0083259	0.8747	0	0	0	0.3902	-6.80	2.0483	82	-3.60	0
FBgn0020412	FBtr0332707	0.1590	5	5	3	0.4104	-9.50	0.1942	1055	-6.20	0
FBgn0020415	FBtr0308080	7.4607	1	1	1	0.5286	-11.50	-0.1147	210	-10.00	0
FBgn0020440	FBtr0301883	0.2726	0	0	0	0.4891	-9.80	0.5259	92	-2.90	0
FBgn0020443	FBtr0344859	0.3139	0	0	0	0.5238	-5.30	1.7854	105	-5.70	0
FBgn0020445	FBtr0089979	0.0387	3	3	3	0.3776	-4.30	0.6865	678	-7.40	0
FBgn0020493	FBtr0083394	0.8680	0	0	0	0.4070	-3.70	-1.7238	570	-1.10	0
FBgn0020496	FBtr0334516	0.8825	2	2	2	0.4524	-0.90	2.9202	378	-5.00	0
FBgn0020497	FBtr0079663	0.7162	0	0	0	0.5040	-9.60	0.7647	371	-5.30	1
FBgn0020503	FBtr0080975	0.4645	0	0	0	0.2977	-2.20	3.5042	262	-4.80	0
FBgn0020510	FBtr0337097	2.4159	0	0	0	0.4783	-2.10	-1.3431	69	-3.90	0
FBgn0020513	FBtr0073705	0.6190	1	1	1	0.4713	-1.20	1.5059	244	-7.30	0
FBgn0020545	FBtr0334794	0.1543	0	0	0	0.5682	-5.80	0.8787	88	-7.00	0
FBgn0020616	FBtr0079349	0.6774	1	1	1	0.3136	-3.30	2.1191	118	-3.40	0
FBgn0020618	FBtr0331238	0.1331	0	0	0	0.4805	-2.40	2.1823	77	-5.30	0
FBgn0020620	FBtr0330626	0.2102	0	0	0	0.6178	-0.40	0.1610	157	-8.10	0
FBgn0020621	FBtr0088601	0.8532	2	2	2	0.3976	-6.60	1.6494	420	-7.50	0
FBgn0020622	FBtr0331208	0.5957	6	6	6	0.4846	0.00	-0.2342	553	-8.40	0
FBgn0020626	FBtr0084801	0.1527	0	0	0	0.5372	-9.20	1.3780	363	-2.90	0
FBgn0020633	FBtr0076585	1.5674	0	0	0	0.4052	-0.40	3.8776	153	-6.30	0
FBgn0020647	FBtr0084506	0.2555	6	6	6	0.4354	-1.30	3.5742	379	-9.90	0
FBgn0020653	FBtr0071167	2.0523	0	0	0	0.4468	-2.50	2.3923	188	-4.10	0
FBgn0020655	FBtr0075981	1.3823	1	1	1	0.4783	-3.20	-0.1360	368	-9.50	0
FBgn0020660	FBtr0113681	45.1552	0	0	0	0.2353	-0.20	1.4903	68	-4.50	0
FBgn0020764	FBtr0072151	0.1544	0	0	0	0.5044	-5.30	-0.9749	113	-2.70	0
FBgn0020767	FBtr0329879	0.1379	5	5	5	0.4239	-4.50	1.2157	427	-0.40	0
FBgn0020887	FBtr0074917	0.1468	10	10	10	0.4494	0.00	3.3067	474	-5.60	0
FBgn0020908	FBtr0334933	3.1399	2	2	2	0.2719	-4.80	2.4359	114	-5.70	0
FBgn0020909	FBtr0073820	0.3968	0	0	0	0.4130	-4.20	1.8441	92	-8.10	0
FBgn0020910	FBtr0336783	0.1776	0	0	0	0.3889	NA	1.6156	36	NA	NA
FBgn0020930	FBtr0339705	0.3421	2	2	2	0.4261	-6.20	0.8554	115	-4.10	0
FBgn0021750	FBtr0083086	0.6214	3	3	3	0.3491	-7.30	2.9210	169	-5.40	0
FBgn0021760	FBtr0089461	0.5026	4	4	3	0.4477	-3.30	1.7854	784	-8.10	0
FBgn0021761	FBtr0340224	1.0230	0	0	0	0.4750	-0.60	1.8818	160	-6.80	0
FBgn0021764	FBtr0340196	0.2519	4	4	4	0.4578	-1.10	-0.8940	367	-8.50	0
FBgn0021765	FBtr0074511	3.6312	0	0	0	0.5041	-0.30	2.6701	123	-3.60	0
FBgn0021768	FBtr0075328	3.1242	0	0	0	0.4048	-0.20	1.8523	126	-11.30	0
FBgn0021795	FBtr0088153	1.7091	2	2	2	0.4702	-1.90	2.9344	151	-7.50	0
FBgn0021796	FBtr0080422	0.4584	3	3	3	0.4869	-2.50	-0.0604	306	-2.40	0
FBgn0021800	FBtr0077497	0.1709	3	3	3	0.4280	-10.00	-0.4642	264	-2.10	0
FBgn0021814	FBtr0310370	2.5459	0	0	0	0.3736	-1.70	0.7075	91	-4.20	0
FBgn0021818	FBtr0086962	0.1677	1	1	1	0.5167	-10.00	0.4069	120	-3.30	0
FBgn0021825	FBtr0088641	2.3480	0	0	0	0.3770	-1.90	2.4160	122	-1.00	0
FBgn0021847	FBtr0086000	0.2913	1	1	1	0.4365	-1.90	-1.8113	181	0.00	0
FBgn0021856	FBtr0330677	1.3260	0	0	0	0.4030	-1.00	3.1991	67	-6.40	0
FBgn0021872	FBtr0310044	0.6412	4	4	4	0.4543	-1.60	3.1812	328	-1.50	0
FBgn0021874	FBtr0078075	0.6504	0	0	0	0.4561	-6.90	0.2160	57	-2.90	0
FBgn0021875	FBtr0072253	0.6012	0	0	0	0.4074	NA	2.8522	27	NA	NA
FBgn0021895	FBtr0072234	0.6599	1	1	1	0.5128	-1.40	0.5371	195	-5.70	0
FBgn0021906	FBtr0334842	1.6714	0	0	0	0.3929	-4.70	3.8795	84	-6.10	0
FBgn0021944	FBtr0346584	0.4312	0	0	0	0.3878	-3.60	1.6861	98	-1.00	0
FBgn0021967	FBtr0077520	1.6131	0	0	0	0.4066	-4.90	1.4746	91	-13.10	0
FBgn0021979	FBtr0343188	1.5631	0	0	0	0.5000	-4.20	3.7318	100	-4.50	0
FBgn0021995	FBtr0088788	0.6310	0	0	0	0.3947	-5.80	3.8573	76	-10.50	0
FBgn0022023	FBtr0079031	0.6251	0	0	0	0.5111	-6.80	3.5719	45	-6.80	0
FBgn0022027	FBtr0088694	0.5330	1	1	1	0.3600	-1.90	1.8993	75	-7.70	0
FBgn0022029	FBtr0086915	0.9438	0	0	0	0.4968	-8.00	3.1991	310	-0.30	0
FBgn0022069	FBtr0080473	1.3970	0	0	0	0.4425	-2.70	0.2883	113	-6.20	0
FBgn0022097	FBtr0087335	3.2493	0	0	0	0.4020	0.00	3.7408	102	-7.00	0
FBgn0022153	FBtr0331447	0.1757	1	1	1	0.5141	-9.20	2.8787	142	-12.10	0
FBgn0022160	FBtr0087307	7.0650	0	0	0	0.5000	-6.10	1.7582	124	-6.90	0
FBgn0022213	FBtr0080930	4.7690	1	1	1	0.4043	0.00	3.9037	141	-3.70	0
FBgn0022224	FBtr0086211	9.0595	0	0	0	0.3226	-4.30	1.5642	93	-9.50	0
FBgn0022238	FBtr0086777	1.5801	0	0	0	0.4980	-2.50	-2.2570	249	-1.80	0
FBgn0022246	FBtr0336990	1.1975	0	0	0	0.4643	-6.70	2.4722	56	-6.70	0
FBgn0022288	FBtr0335269	0.7359	0	0	0	0.3939	-3.30	-0.0118	99	-2.00	0
FBgn0022338	FBtr0321263	1.2029	3	3	3	0.3182	-3.10	-2.8732	220	-9.00	0
FBgn0022343	FBtr0072391	1.6972	0	0	0	0.3596	-0.40	0.4738	89	-7.90	0
FBgn0022344	FBtr0083358	1.4939	0	0	0	0.3488	-3.30	1.4259	43	-3.00	0
FBgn0022349	FBtr0085839	0.4354	1	1	1	0.4545	-5.30	2.3517	363	-6.40	0
FBgn0022359	FBtr0082324	1.4762	0	0	0	0.4085	-3.50	1.3583	71	-8.40	0
FBgn0022361	FBtr0089995	0.6870	4	4	4	0.3924	-6.10	0.1289	316	-8.70	0
FBgn0022382	FBtr0088437	2.5352	0	0	0	0.4489	-5.60	1.7565	352	-3.80	0
FBgn0022699	FBtr0077017	0.5770	1	1	1	0.4202	-7.60	3.9032	119	-7.70	0
FBgn0022702	FBtr0072795	0.7483	0	0	0	0.5000	-9.60	-1.4276	100	-7.90	0
FBgn0022708	FBtr0072163	1.0704	1	1	1	0.4196	-3.30	1.7960	112	-3.70	0
FBgn0022709	FBtr0076018	0.5927	0	0	0	0.4903	-8.20	1.5572	361	-8.40	0
FBgn0022710	FBtr0332497	0.1174	3	3	3	0.4589	-2.50	2.6280	950	-8.10	0
FBgn0022724	FBtr0074514	0.6501	0	0	0	0.4222	-2.00	-0.9977	90	-10.00	0
FBgn0022764	FBtr0087889	0.3240	8	8	8	0.4453	-5.00	2.7378	950	-2.70	0
FBgn0022768	FBtr0343531	0.0898	5	5	3	0.4123	-1.80	1.1573	747	-6.90	0
FBgn0022772	FBtr0088959	0.4388	0	0	0	0.4846	-11.20	0.8327	130	-6.50	0
FBgn0022774	FBtr0074961	10.7175	0	0	0	0.5165	-3.30	2.9878	91	-5.60	0
FBgn0022786	FBtr0071070	0.7886	0	0	0	0.2788	-0.30	-1.7924	104	-5.40	0
FBgn0022787	FBtr0301715	0.6080	3	3	2	0.4580	-1.40	1.0826	583	-3.60	0
FBgn0022893	FBtr0085919	5.4219	0	0	0	0.3667	-1.40	4.2587	240	-3.50	0
FBgn0022935	FBtr0077016	0.1783	0	0	0	0.4583	-10.50	2.8058	144	-8.70	0
FBgn0022936	FBtr0078439	0.6017	0	0	0	0.5556	NA	2.5773	9	NA	NA
FBgn0022942	FBtr0070684	0.8191	0	0	0	0.4571	-3.90	1.0043	280	0.00	0
FBgn0022943	FBtr0083551	2.0053	0	0	0	0.3088	-1.80	1.7328	68	-1.90	0
FBgn0022959	FBtr0305992	3.5855	0	0	0	0.4924	-3.40	1.3912	264	-6.20	0
FBgn0022960	FBtr0086183	0.8065	1	1	1	0.4524	-3.20	3.1706	294	-9.70	0
FBgn0022981	FBtr0078859	0.5122	2	2	2	0.4458	-7.50	2.2687	83	-2.70	0
FBgn0022984	FBtr0307214	3.6753	1	1	1	0.2812	-6.30	4.2806	96	-2.50	0
FBgn0022985	FBtr0339535	0.1772	1	1	1	0.5214	-3.30	-0.2419	257	-9.20	0
FBgn0022986	FBtr0071843	1.0996	1	1	1	0.3577	-0.70	1.3441	123	-0.70	0
FBgn0022987	FBtr0306248	3.1820	0	0	0	0.4016	-11.00	1.3843	127	-4.80	0
FBgn0023000	FBtr0072570	3.5589	0	0	0	0.3878	-5.00	-0.1022	147	-9.60	0
FBgn0023081	FBtr0072287	0.7264	1	1	1	0.4144	-4.10	2.0607	111	-6.40	0
FBgn0023083	FBtr0344290	0.7842	2	2	2	0.4750	-5.30	-0.2072	819	-7.50	0
FBgn0023094	FBtr0074924	0.9050	3	3	3	0.4146	-7.40	-0.6273	164	-9.40	0
FBgn0023095	FBtr0075832	21.2380	3	3	3	0.4713	-3.20	-1.4051	887	-4.70	0
FBgn0023097	FBtr0300617	0.5334	5	5	5	0.4624	-10.10	3.5458	705	-4.10	0
FBgn0023129	FBtr0076457	1.1798	0	0	0	0.4411	-2.50	1.4028	297	-7.00	0
FBgn0023130	FBtr0070279	0.0537	2	2	2	0.5852	-8.50	1.4934	352	-6.70	1
FBgn0023143	FBtr0088499	1.2169	0	0	0	0.5035	-4.50	-0.9513	288	-7.50	0
FBgn0023167	FBtr0087986	1.3701	0	0	0	0.3904	-1.20	1.5679	146	-3.00	0
FBgn0023169	FBtr0070218	4.4133	0	0	0	0.5174	-11.70	0.4023	259	-20.20	0
FBgn0023170	FBtr0072185	0.5279	0	0	0	0.4390	NA	2.8459	41	NA	0
FBgn0023171	FBtr0088883	0.4505	0	0	0	0.2903	NA	-0.1056	31	NA	NA
FBgn0023172	FBtr0086970	0.5225	4	4	4	0.4144	-3.80	-1.6713	473	-4.40	0
FBgn0023174	FBtr0075629	2.8352	0	0	0	0.3248	-1.20	0.9651	117	-3.40	0
FBgn0023175	FBtr0089998	2.3301	0	0	0	0.3866	-3.00	-0.3132	119	-1.20	0
FBgn0023177	FBtr0077324	1.0500	1	1	1	0.5378	-13.20	1.1328	251	-4.20	0
FBgn0023180	FBtr0088482	3.1400	1	1	1	0.3736	-7.70	1.9709	91	-6.20	0
FBgn0023181	FBtr0072425	0.7829	0	0	0	0.4098	-6.90	1.8688	122	-6.40	0
FBgn0023212	FBtr0083947	0.8310	0	0	0	0.5761	-3.30	1.9637	394	-6.20	0
FBgn0023213	FBtr0089243	1.2405	5	5	5	0.3184	-7.30	0.0326	380	-12.40	0
FBgn0023215	FBtr0301823	0.4620	1	1	1	0.3720	-7.20	-1.9970	793	-3.40	0
FBgn0023216	FBtr0307280	0.2672	1	1	1	0.4815	-6.40	0.4725	135	-5.30	0
FBgn0023388	FBtr0081503	0.2219	2	2	2	0.3904	-5.10	3.5482	333	-7.40	1
FBgn0023395	FBtr0074998	1.0576	0	0	0	0.3816	-0.20	-0.1139	76	-2.50	0
FBgn0023407	FBtr0080514	0.3260	7	7	3	0.5009	-6.60	-1.2796	571	-3.60	0
FBgn0023441	FBtr0087346	0.4747	5	5	5	0.3821	-4.90	3.2651	602	-8.50	0
FBgn0023458	FBtr0303341	0.8587	3	3	3	0.3741	-6.40	-0.2741	139	-0.80	0
FBgn0023477	FBtr0072141	1.6191	0	0	0	0.4000	NA	0.1791	20	NA	NA
FBgn0023506	FBtr0071198	1.3189	0	0	0	0.3152	-0.90	0.5777	92	-2.20	0
FBgn0023507	FBtr0070381	0.9081	0	0	0	0.4863	0.00	1.8157	183	-6.00	0
FBgn0023508	FBtr0332586	0.1133	3	3	1	0.5410	-2.70	0.5102	708	-6.80	1
FBgn0023509	FBtr0070315	0.4083	0	0	0	0.3860	-3.00	-3.0277	114	-4.90	0
FBgn0023510	FBtr0070316	0.4510	3	3	3	0.5039	-6.00	3.0033	647	-5.60	1
FBgn0023511	FBtr0070353	0.1708	0	0	0	0.4717	-1.20	0.8307	53	-8.30	0
FBgn0023512	FBtr0070351	0.2896	0	0	0	0.4706	-6.30	1.6409	51	-6.50	0
FBgn0023513	FBtr0070310	0.5419	0	0	0	0.4906	-4.40	2.2753	53	-4.40	0
FBgn0023514	FBtr0070312	0.4872	1	1	1	0.3909	-1.40	3.1515	110	-6.70	0
FBgn0023515	FBtr0339494	0.1788	1	1	1	0.4040	-0.10	3.8776	99	-0.40	0
FBgn0023516	FBtr0070368	0.1844	0	0	0	0.4483	-3.50	2.4217	116	-4.50	0
FBgn0023517	FBtr0070366	1.5657	0	0	0	0.2857	NA	0.4817	35	NA	NA
FBgn0023518	FBtr0070362	0.1140	1	1	1	0.5086	-5.80	-2.6330	175	-2.10	0
FBgn0023519	FBtr0332579	0.7137	1	1	1	0.3626	0.00	1.3181	91	-8.50	0
FBgn0023520	FBtr0070349	0.5959	0	0	0	0.3837	-1.80	-1.2087	86	-6.60	0
FBgn0023521	FBtr0070321	0.7952	0	0	0	0.4125	-1.10	-0.1739	80	-9.10	0
FBgn0023522	FBtr0070318	0.4775	1	1	1	0.4951	-2.60	-0.6581	103	-7.60	0
FBgn0023526	FBtr0070408	0.2191	2	2	2	0.3961	-4.90	2.2933	722	-13.60	0
FBgn0023527	FBtr0070398	0.4760	0	0	0	0.4746	-0.60	0.0474	59	-1.40	0
FBgn0023528	FBtr0346648	0.2061	3	3	3	0.4266	-0.40	2.6904	668	-10.10	0
FBgn0023529	FBtr0300792	1.5546	0	0	0	0.3636	-0.90	0.8478	132	-2.30	0
FBgn0023530	FBtr0070283	2.7172	1	1	1	0.4340	-6.60	0.6292	288	-12.40	0
FBgn0023531	FBtr0308321	0.0224	0	0	0	0.5435	-7.20	0.1260	517	-2.60	0
FBgn0023535	FBtr0070088	0.1104	0	0	0	0.4805	-6.00	3.3437	77	-12.70	0
FBgn0023536	FBtr0070079	0.4274	1	1	1	0.3036	-5.10	2.7725	112	-4.10	0
FBgn0023537	FBtr0070092	0.4909	0	0	0	0.5513	0.00	2.1561	78	-7.20	0
FBgn0023540	FBtr0310501	0.2262	0	0	0	0.5813	-5.10	0.5386	203	-4.60	0
FBgn0023542	FBtr0070425	0.9510	0	0	0	0.4308	-4.10	-2.6444	130	-1.10	0
FBgn0023545	FBtr0070347	2.6492	0	0	0	0.4706	-7.40	1.9626	68	-8.60	0
FBgn0023549	FBtr0070393	1.5633	1	1	1	0.5087	-3.30	3.5964	629	-8.50	0
FBgn0024177	FBtr0330185	0.2523	2	2	2	0.3659	-1.70	1.1495	123	-7.40	0
FBgn0024182	FBtr0100536	0.4397	0	0	0	0.4194	NA	-0.5615	31	NA	NA
FBgn0024183	FBtr0080720	1.0543	0	0	0	0.5022	-1.50	1.6900	225	-8.90	0
FBgn0024187	FBtr0345912	0.3078	4	3	2	0.4321	-2.40	1.3886	641	-4.00	0
FBgn0024188	FBtr0088126	5.7415	0	0	0	0.4370	-2.70	3.1927	119	-6.10	0
FBgn0024191	FBtr0345545	0.8688	1	1	1	0.3882	-2.80	0.4725	85	-4.30	0
FBgn0024194	FBtr0073029	0.2227	0	0	0	0.5263	NA	-1.0393	19	NA	NA
FBgn0024196	FBtr0086920	1.7200	0	0	0	0.3434	-8.60	3.2912	99	-2.30	0
FBgn0024222	FBtr0304804	0.2196	2	2	2	0.3861	-3.80	2.4831	101	-6.90	0
FBgn0024227	FBtr0080180	1.4299	0	0	0	0.2991	0.00	0.9644	117	-0.10	0
FBgn0024230	FBtr0081288	0.0877	3	3	3	0.4656	-7.10	-1.5216	131	-15.20	0
FBgn0024234	FBtr0072127	6.7620	1	1	1	0.4249	-4.70	1.4529	193	-3.90	0
FBgn0024236	FBtr0331417	0.0647	1	1	1	0.4826	-5.50	2.8035	230	-4.10	0
FBgn0024238	FBtr0074441	1.5166	1	1	1	0.3677	-2.50	2.8281	495	-5.50	0
FBgn0024245	FBtr0336820	0.0833	3	3	3	0.4356	-2.90	-3.6117	388	-5.50	0
FBgn0024248	FBtr0303904	0.3758	1	1	1	0.3750	-1.30	1.3085	72	-7.30	0
FBgn0024251	FBtr0331744	0.5179	1	1	1	0.3739	-1.30	2.1542	115	-2.20	0
FBgn0024273	FBtr0085352	0.2714	3	3	3	0.5150	0.00	-0.9890	266	-5.20	0
FBgn0024277	FBtr0072644	0.1073	4	4	4	0.4743	-3.80	0.0894	350	-4.70	0
FBgn0024285	FBtr0079875	1.3667	0	0	0	0.4380	-8.60	3.1706	137	-5.90	0
FBgn0024291	FBtr0080434	0.3737	2	2	2	0.4637	-15.40	3.5198	427	-9.90	0
FBgn0024314	FBtr0304710	1.2128	1	1	1	0.4968	-3.50	0.7459	157	-4.00	0
FBgn0024315	FBtr0340067	2.4627	2	2	2	0.4031	0.00	2.1823	382	-10.40	0
FBgn0024320	FBtr0303907	5.7009	1	1	1	0.3922	-6.30	0.4355	102	-3.80	0
FBgn0024321	FBtr0306742	2.7423	0	0	0	0.4387	-5.60	-0.9000	563	-11.20	0
FBgn0024326	FBtr0300443	0.3880	2	2	2	0.4842	-3.70	2.9299	285	-2.20	0
FBgn0024329	FBtr0083684	0.1120	2	2	2	0.4385	-3.70	3.3149	358	-6.40	0
FBgn0024330	FBtr0339719	2.4139	0	0	0	0.4748	-5.50	3.3086	457	-14.50	1
FBgn0024332	FBtr0340476	0.7560	0	0	0	0.4225	-8.40	1.7997	142	-7.60	0
FBgn0024352	FBtr0078131	1.4809	0	0	0	0.4067	-2.60	2.4788	150	-3.30	0
FBgn0024360	FBtr0070236	0.1051	0	0	0	0.5225	-13.60	0.5433	111	-1.20	0
FBgn0024362	FBtr0310619	0.2320	0	0	0	0.5647	-5.30	2.2046	85	-10.60	0
FBgn0024364	FBtr0070212	0.0807	0	0	0	0.5062	-6.00	0.7481	81	-6.90	0
FBgn0024365	FBtr0342738	0.3025	3	3	1	0.5335	-6.00	-0.0433	493	-1.30	0
FBgn0024366	FBtr0342730	0.2868	0	0	0	0.3838	-3.30	-0.2994	284	-5.30	0
FBgn0024371	FBtr0081501	0.4761	3	3	3	0.4286	-5.60	-0.0576	189	0.00	0
FBgn0024432	FBtr0083575	1.8060	0	0	0	0.4301	-5.00	0.7407	193	-4.60	0
FBgn0024491	FBtr0083279	2.4409	0	0	0	0.3333	-1.90	1.4611	120	-5.20	0
FBgn0024509	FBtr0084409	1.1915	0	0	0	0.4951	-7.30	3.1352	103	-5.30	0
FBgn0024510	FBtr0072790	0.8937	0	0	0	0.4140	-2.50	1.0949	215	-6.60	0
FBgn0024542	FBtr0333367	1.3087	0	0	0	0.4138	-3.30	-2.7870	58	-8.10	0
FBgn0024555	FBtr0082817	0.1600	3	3	2	0.4561	-4.10	1.7857	524	-6.80	0
FBgn0024556	FBtr0087670	1.0556	0	0	0	0.4656	-1.90	1.7392	131	-3.20	0
FBgn0024558	FBtr0084280	0.4588	0	0	0	0.5429	-8.50	0.5631	105	-13.40	0
FBgn0024689	FBtr0346627	0.2457	0	0	0	0.3265	-4.80	1.3609	49	-8.40	0
FBgn0024698	FBtr0089258	0.1521	1	1	1	0.4194	-2.10	1.7692	124	-3.00	0
FBgn0024728	FBtr0089090	0.5422	2	2	2	0.2625	-2.30	1.4624	80	-1.40	0
FBgn0024732	FBtr0087978	0.6213	1	1	1	0.4167	-2.60	1.2259	252	-4.50	0
FBgn0024733	FBtr0333910	0.6942	0	0	0	0.4884	-10.70	2.8957	43	-10.70	0
FBgn0024734	FBtr0080856	0.7655	7	7	6	0.3670	-1.10	-4.9147	1365	-7.60	0
FBgn0024754	FBtr0087352	1.3202	0	0	0	0.3590	0.00	2.1649	234	-5.00	0
FBgn0024804	FBtr0113715	1.0084	0	0	0	0.2712	0.00	3.1812	59	-5.30	0
FBgn0024806	FBtr0072520	0.4054	3	3	3	0.3799	-0.90	-0.1777	329	-0.30	0
FBgn0024807	FBtr0077372	4.7431	0	0	0	0.2857	-0.70	3.1629	112	-6.10	0
FBgn0024811	FBtr0089113	2.6289	2	2	2	0.3160	-4.40	1.8311	231	-8.50	0
FBgn0024814	FBtr0074830	1.9658	0	0	0	0.4114	-3.40	1.2757	175	-9.00	0
FBgn0024833	FBtr0082114	1.2411	1	1	1	0.5109	-5.50	1.2847	276	-3.60	0
FBgn0024841	FBtr0085458	0.6759	0	0	0	0.4697	-1.70	2.2547	66	-4.10	0
FBgn0024846	FBtr0080534	2.7631	1	1	1	0.4498	-2.90	2.6695	209	-5.40	0
FBgn0024887	FBtr0078181	0.5229	0	0	0	0.3778	-1.10	0.7552	90	-5.10	0
FBgn0024889	FBtr0074881	0.2468	1	1	1	0.4911	-2.40	2.2879	112	-2.00	0
FBgn0024909	FBtr0081756	0.7333	0	0	0	0.4693	-8.20	-3.4495	228	-1.20	0
FBgn0024912	FBtr0347362	2.2489	0	0	0	0.4231	-6.90	-0.8036	78	-9.00	0
FBgn0024920	FBtr0077679	2.4354	0	0	0	0.3529	-4.90	2.5231	68	-15.80	0
FBgn0024921	FBtr0077000	1.3994	0	0	0	0.3733	-0.40	3.9693	150	-3.60	0
FBgn0024944	FBtr0083933	5.6796	6	6	6	0.4819	-10.30	1.2954	996	-4.40	0
FBgn0024945	FBtr0072483	1.0212	0	0	0	0.5325	-5.20	-2.2587	77	-8.00	0
FBgn0024947	FBtr0332459	0.2353	0	0	0	0.4688	-4.40	1.8408	192	-7.80	0
FBgn0024956	FBtr0088255	0.7953	0	0	0	0.4128	-2.10	0.7428	109	-0.10	0
FBgn0024957	FBtr0082259	0.5775	0	0	0	0.3889	-5.00	1.4791	54	-4.10	0
FBgn0024958	FBtr0084327	0.3054	0	0	0	0.4127	-0.10	2.7507	63	-4.20	0
FBgn0024973	FBtr0070498	0.5200	2	2	2	0.4671	-9.20	1.2079	152	-3.00	0
FBgn0024975	FBtr0070488	0.1252	0	0	0	0.3958	-0.30	-2.1227	96	-6.90	0
FBgn0024980	FBtr0332496	3.8081	0	0	0	0.4726	-8.10	2.3644	237	-3.10	0
FBgn0024983	FBtr0100475	1.1570	0	0	0	0.5049	-11.70	1.4847	206	-6.60	0
FBgn0024984	FBtr0070392	2.0381	0	0	0	0.4805	-2.40	0.7573	77	-6.30	0
FBgn0024985	FBtr0070225	0.3120	2	2	2	0.5122	-9.60	-3.1930	490	-1.10	0
FBgn0024986	FBtr0070233	2.3133	0	0	0	0.4968	-0.70	0.9707	157	-1.60	0
FBgn0024987	FBtr0070215	0.4074	0	0	0	0.4720	-4.60	-1.2912	161	-5.10	0
FBgn0024991	FBtr0310649	0.3913	0	0	0	0.5098	-10.70	0.8058	51	-10.90	0
FBgn0024992	FBtr0345716	0.1659	0	0	0	0.4649	-9.30	1.4529	228	-3.60	0
FBgn0024993	FBtr0345709	0.6361	0	0	0	0.3721	-2.90	-0.3391	86	-1.60	0
FBgn0024994	FBtr0070501	0.3822	0	0	0	0.5111	-5.70	2.3430	225	-3.70	0
FBgn0024996	FBtr0070479	0.8806	1	1	1	0.4286	-0.40	1.8075	147	-1.10	0
FBgn0024998	FBtr0070499	0.5429	0	0	0	0.3836	-2.70	3.1352	219	-3.80	0
FBgn0025109	FBtr0077643	0.1807	2	2	2	0.4651	-9.50	1.7964	129	-5.40	0
FBgn0025111	FBtr0073426	1.7093	0	0	0	0.3874	-4.90	2.5219	111	-9.20	0
FBgn0025117	FBtr0335504	0.6146	0	0	0	0.5000	-7.30	1.9652	94	-7.30	0
FBgn0025185	FBtr0088980	0.8793	0	0	0	0.3519	-6.40	0.9379	54	-3.80	0
FBgn0025186	FBtr0071774	0.2398	4	4	4	0.4967	-5.60	0.8154	606	-5.40	0
FBgn0025286	FBtr0088525	0.5578	0	0	0	0.4583	-7.80	3.0453	72	-11.20	0
FBgn0025335	FBtr0072227	0.3036	3	3	3	0.4294	-5.50	2.3185	347	-12.00	0
FBgn0025336	FBtr0072225	0.4781	1	1	1	0.3253	-1.40	0.9554	83	-3.20	0
FBgn0025352	FBtr0072226	3.7583	0	0	0	0.4231	-5.10	2.0537	78	-3.90	0
FBgn0025355	FBtr0076203	0.0444	3	2	0	0.4431	-3.40	-0.2199	404	-11.30	0
FBgn0025366	FBtr0080017	0.1997	0	0	0	0.3492	-5.80	2.0002	63	-5.60	0
FBgn0025373	FBtr0088170	3.3504	0	0	0	0.3953	-4.20	3.7226	86	-6.90	0
FBgn0025381	FBtr0070259	0.5777	1	1	1	0.5648	-0.70	0.7365	687	-11.80	0
FBgn0025382	FBtr0070294	0.0355	2	2	1	0.5874	-6.00	0.1403	778	-3.50	0
FBgn0025388	FBtr0300754	0.0632	1	1	1	0.3942	-5.50	0.8569	104	-2.90	0
FBgn0025390	FBtr0343517	54.9154	5	5	5	0.5448	-1.50	1.9218	1272	0.00	0
FBgn0025394	FBtr0339590	2.5620	3	3	3	0.5344	-8.90	1.7595	393	-6.70	0
FBgn0025455	FBtr0333124	0.1168	6	5	3	0.5182	-5.80	2.2987	716	-4.80	0
FBgn0025456	FBtr0089897	1.0770	0	0	0	0.4911	-6.50	0.1942	112	-3.70	0
FBgn0025457	FBtr0339148	1.2707	0	0	0	0.3628	-4.30	3.2651	113	-9.60	0
FBgn0025463	FBtr0073741	0.4006	0	0	0	0.4222	-3.70	2.1514	135	-8.10	0
FBgn0025469	FBtr0088824	0.9576	0	0	0	0.4496	-6.90	-0.1446	129	-7.60	0
FBgn0025519	FBtr0087185	0.6332	2	2	2	0.3529	-2.50	-3.3476	119	-3.60	0
FBgn0025549	FBtr0346619	0.1158	5	5	2	0.4194	-0.60	2.6483	763	-7.50	0
FBgn0025558	FBtr0075314	1.4046	0	0	0	0.3333	-11.40	-0.1511	90	-5.60	0
FBgn0025571	FBtr0083456	0.1422	0	0	0	0.4363	-6.00	1.1448	204	-3.70	0
FBgn0025574	FBtr0112907	0.5828	3	3	3	0.4550	-6.40	4.6059	411	-2.20	0
FBgn0025582	FBtr0075345	0.5858	0	0	0	0.4537	-3.20	1.3322	108	-7.00	0
FBgn0025592	FBtr0072530	1.3212	2	2	2	0.4302	-5.80	-2.2206	172	-5.20	0
FBgn0025608	FBtr0343115	0.2886	2	2	2	0.5042	-2.90	2.3785	361	-2.10	0
FBgn0025615	FBtr0070690	1.4163	1	1	0	0.4265	-3.60	-5.3049	68	-1.10	0
FBgn0025621	FBtr0343325	0.2471	1	1	1	0.5424	-6.60	-2.5995	330	-5.40	0
FBgn0025624	FBtr0070375	2.0356	0	0	0	0.4872	-2.80	0.2747	117	-2.30	0
FBgn0025626	FBtr0070339	0.0297	2	2	2	0.5166	-6.00	-0.1767	151	-5.70	0
FBgn0025628	FBtr0070337	0.4666	0	0	0	0.5488	-2.50	2.0702	164	-9.80	0
FBgn0025629	FBtr0070331	0.2644	0	0	0	0.4750	-4.70	0.3116	80	-5.10	0
FBgn0025630	FBtr0344156	0.3575	3	3	3	0.5081	-4.40	2.4972	862	-3.10	0
FBgn0025632	FBtr0340109	0.0000	0	0	0	0.5023	-4.90	-3.8048	444	-3.20	0
FBgn0025633	FBtr0070161	0.4182	3	3	3	0.5186	-1.70	-3.2422	754	-7.60	0
FBgn0025634	FBtr0070121	2.3048	0	0	0	0.3852	-4.20	0.3207	135	-4.40	0
FBgn0025635	FBtr0070116	1.4673	0	0	0	0.3780	-6.30	1.6451	127	-9.20	0
FBgn0025637	FBtr0345314	1.9488	0	0	0	0.3611	NA	2.9182	36	NA	NA
FBgn0025638	FBtr0343564	4.0559	0	0	0	0.4167	-4.30	2.6063	144	-7.70	0
FBgn0025639	FBtr0070151	0.1428	4	4	3	0.4738	-2.70	1.8475	667	-4.30	0
FBgn0025640	FBtr0070115	0.3049	0	0	0	0.5514	-1.70	1.5704	214	-11.90	0
FBgn0025641	FBtr0070239	0.0347	3	3	3	0.5528	-1.80	1.0631	1174	-4.40	0
FBgn0025674	FBtr0085942	0.7489	2	2	2	0.4475	-10.80	-0.1773	219	-2.60	0
FBgn0025676	FBtr0072604	0.5230	0	0	0	0.2500	NA	NA	4	NA	NA
FBgn0025678	FBtr0345544	2.8035	0	0	0	0.3934	-3.30	2.4306	183	-17.40	0
FBgn0025681	FBtr0077644	0.0883	7	7	7	0.4454	0.00	1.6090	595	-3.60	0
FBgn0025682	FBtr0089942	2.5569	0	0	0	0.5370	-7.20	1.7929	54	-4.90	0
FBgn0025683	FBtr0100379	10.2568	0	0	0	0.4885	-4.40	2.7315	262	-12.40	0
FBgn0025684	FBtr0077456	0.1257	2	2	2	0.4663	-3.30	1.2280	208	-12.20	0
FBgn0025693	FBtr0086053	0.1221	1	1	1	0.4332	-1.20	1.5389	277	-9.00	0
FBgn0025700	FBtr0079900	3.5128	0	0	0	0.4421	-2.20	3.5264	95	-6.40	0
FBgn0025716	FBtr0086960	2.3775	0	0	0	0.4309	-2.50	1.6082	123	-8.20	0
FBgn0025720	FBtr0086317	0.2780	2	2	2	0.3519	-2.60	1.7157	108	-9.40	0
FBgn0025724	FBtr0080469	1.7601	0	0	0	0.4750	-8.60	0.3588	120	-3.30	0
FBgn0025725	FBtr0072811	1.3696	0	0	0	0.4701	-4.70	1.6625	134	-4.40	0
FBgn0025726	FBtr0089246	0.0719	11	11	10	0.3254	-5.50	2.8019	590	-1.70	0
FBgn0025739	FBtr0070681	0.0584	0	0	0	0.3556	-3.40	0.7287	135	-4.90	0
FBgn0025740	FBtr0308297	0.7549	4	4	4	0.2797	0.00	1.7826	354	-2.40	0
FBgn0025741	FBtr0089225	0.7270	4	4	4	0.3493	-5.70	-0.7085	229	-5.70	0
FBgn0025742	FBtr0345290	0.8321	3	3	3	0.4069	-2.10	2.4576	204	-1.40	0
FBgn0025743	FBtr0074285	0.0918	3	3	1	0.4753	-10.30	0.7623	507	-0.20	0
FBgn0025777	FBtr0079307	1.6950	1	1	1	0.4917	-4.50	0.5260	120	-4.10	0
FBgn0025781	FBtr0084377	3.1676	2	2	2	0.3111	0.00	3.3212	90	-4.60	0
FBgn0025790	FBtr0089627	1.1689	1	1	1	0.4244	-2.40	1.4104	344	-3.30	0
FBgn0025800	FBtr0340159	0.4184	1	1	1	0.5165	-8.60	-0.6278	879	-5.50	1
FBgn0025802	FBtr0082530	0.5895	0	0	0	0.4756	-9.10	2.1957	164	-1.90	0
FBgn0025806	FBtr0072177	0.3557	2	2	2	0.3505	0.00	2.0002	388	-1.50	0
FBgn0025807	FBtr0112917	0.9141	0	0	0	0.3478	-7.50	-1.8279	69	-9.80	0
FBgn0025808	FBtr0082974	1.8654	1	1	1	0.3125	-2.80	3.1991	48	-2.30	0
FBgn0025809	FBtr0074190	1.6831	6	6	6	0.3843	-7.00	2.5165	523	-5.00	0
FBgn0025814	FBtr0077243	0.7486	0	0	0	0.3400	-2.60	1.5245	100	-10.60	0
FBgn0025815	FBtr0070952	1.3529	0	0	0	0.4622	-2.30	3.8776	119	-3.40	0
FBgn0025820	FBtr0072788	0.5594	2	2	2	0.4479	-4.50	2.3754	163	-4.30	0
FBgn0025825	FBtr0078767	0.2950	2	2	2	0.5162	-7.30	0.1217	277	-5.90	0
FBgn0025830	FBtr0087036	0.6788	0	0	0	0.4086	-8.50	0.4939	93	-5.60	0
FBgn0025832	FBtr0087075	1.3440	0	0	0	0.3175	-1.00	1.6509	126	-6.60	0
FBgn0025836	FBtr0112919	0.3020	3	3	3	0.3651	-11.30	3.5979	304	-3.10	0
FBgn0025839	FBtr0343049	4.2337	0	0	0	0.3419	-2.30	1.5687	117	-1.90	0
FBgn0025864	FBtr0071219	0.1402	3	3	3	0.4766	-7.10	1.2433	577	-8.00	0
FBgn0025865	FBtr0306349	1.1021	2	2	2	0.4074	-2.30	1.6186	162	-11.30	0
FBgn0025866	FBtr0076343	0.7022	0	0	0	0.3008	-5.90	3.3411	522	-5.20	0
FBgn0025874	FBtr0075791	0.3221	0	0	0	0.4384	-5.70	-2.2615	73	-5.20	0
FBgn0025885	FBtr0089329	0.8183	0	0	0	0.4891	-3.60	1.4940	137	-5.70	0
FBgn0025936	FBtr0089084	0.2943	2	2	2	0.3172	-0.60	4.2765	331	-1.90	0
FBgn0026015	FBtr0340028	0.1998	3	3	3	0.4788	-6.00	-0.8526	259	-5.90	0
FBgn0026056	FBtr0084002	0.7324	1	1	1	0.3511	-3.00	-0.1217	94	-7.80	0
FBgn0026059	FBtr0083231	0.8697	1	1	1	0.4233	0.00	0.7270	163	-8.00	0
FBgn0026060	FBtr0070884	0.0277	0	0	0	0.4181	-3.50	1.4191	177	-5.10	0
FBgn0026076	FBtr0300787	0.5396	13	13	13	0.3685	0.00	0.3409	483	-5.80	0
FBgn0026079	FBtr0070669	1.6566	0	0	0	0.3846	-3.70	0.1131	130	-13.30	0
FBgn0026080	FBtr0333186	0.7378	0	0	0	0.3608	-2.70	0.4880	97	-6.00	0
FBgn0026083	FBtr0305185	0.9193	2	2	2	0.4152	-8.20	-1.8889	330	-7.70	0
FBgn0026084	FBtr0070639	7.0055	0	0	0	0.4783	0.00	3.4923	161	-4.30	0
FBgn0026085	FBtr0070642	0.9544	0	0	0	0.4302	-5.40	1.3842	86	-10.40	0
FBgn0026086	FBtr0305497	0.3648	8	8	7	0.4542	0.00	-0.5537	502	-7.40	0
FBgn0026088	FBtr0070364	0.9061	0	0	0	0.4000	-6.80	1.9393	90	-0.70	0
FBgn0026089	FBtr0345510	3.3308	0	0	0	0.3282	-4.90	3.6466	131	-6.80	0
FBgn0026090	FBtr0333511	0.8975	0	0	0	0.4348	-5.80	-2.4593	69	-0.10	0
FBgn0026143	FBtr0070182	0.3764	2	2	2	0.4934	-5.50	2.0745	229	-4.50	0
FBgn0026144	FBtr0071052	12.5894	1	1	1	0.3379	-2.80	4.6059	364	-5.90	0
FBgn0026147	FBtr0300402	0.7905	1	1	1	0.4486	-9.40	-1.8124	535	-2.30	0
FBgn0026148	FBtr0080149	1.9532	0	0	0	0.4138	NA	2.8543	29	NA	NA
FBgn0026149	FBtr0071358	3.0185	0	0	0	0.4476	-5.60	1.6156	286	-0.80	0
FBgn0026150	FBtr0080956	6.3335	1	1	1	0.3212	-3.70	3.3763	137	-4.30	0
FBgn0026175	FBtr0074797	0.0000	0	0	0	0.4091	-4.00	2.4576	66	-5.60	0
FBgn0026179	FBtr0078289	0.5726	1	1	1	0.4766	-2.30	2.2184	384	-7.90	0
FBgn0026181	FBtr0340153	0.3602	0	0	0	0.5054	-7.40	-3.7293	93	-3.70	0
FBgn0026189	FBtr0073118	0.9189	3	3	3	0.5139	-6.50	-0.1923	360	-4.20	0
FBgn0026192	FBtr0074455	0.7679	0	0	0	0.4682	-7.90	2.2465	299	-9.50	0
FBgn0026196	FBtr0079369	0.1262	1	1	0	0.4015	-1.80	0.5820	132	-3.30	0
FBgn0026197	FBtr0110845	0.0000	0	0	0	0.5506	-7.10	-2.4990	158	-11.60	0
FBgn0026199	FBtr0089092	0.1982	5	4	4	0.2876	-2.50	0.7307	386	-3.10	0
FBgn0026206	FBtr0333475	0.2325	3	3	2	0.4497	-5.00	1.6254	954	-7.90	0
FBgn0026207	FBtr0082668	1.7465	0	0	0	0.4314	-5.20	0.8332	51	-5.20	0
FBgn0026238	FBtr0309846	0.1972	3	3	2	0.3714	-1.60	2.5335	455	-8.70	0
FBgn0026239	FBtr0089768	0.0966	3	3	3	0.5135	-5.90	-0.3300	481	-3.70	0
FBgn0026250	FBtr0083572	1.5326	0	0	0	0.4663	-4.80	3.2888	163	-5.10	0
FBgn0026252	FBtr0076685	0.3130	0	0	0	0.4828	-0.40	3.8729	261	-6.60	0
FBgn0026257	FBtr0084559	1.0768	2	2	2	0.2991	-1.00	0.3710	107	-4.90	0
FBgn0026259	FBtr0073144	0.3509	0	0	0	0.5457	-6.80	1.3337	361	-6.20	0
FBgn0026261	FBtr0071860	1.6663	0	0	0	0.3373	-2.70	-1.9642	83	-4.30	0
FBgn0026262	FBtr0089110	0.2796	1	1	1	0.3585	-4.50	2.1542	159	-3.10	0
FBgn0026263	FBtr0302329	0.1911	0	0	0	0.5057	-5.90	-0.1082	176	-3.40	0
FBgn0026309	FBtr0089549	0.4883	0	0	0	0.4265	-3.00	0.4860	68	-1.30	0
FBgn0026313	FBtr0074451	0.0710	2	2	2	0.5073	-6.10	0.5386	205	-2.70	0
FBgn0026315	FBtr0082374	1.7810	0	0	0	0.5500	NA	-0.5745	40	NA	0
FBgn0026316	FBtr0089553	1.4594	0	0	0	0.4968	-0.90	2.2389	308	-2.70	0
FBgn0026317	FBtr0084546	0.3388	2	2	2	0.4701	-1.50	0.3289	268	-8.30	0
FBgn0026323	FBtr0077319	0.2501	8	8	6	0.4901	-4.00	0.6676	961	-7.50	0
FBgn0026324	FBtr0077735	2.9672	0	0	0	0.3676	-4.40	-2.8798	68	-0.40	0
FBgn0026326	FBtr0088599	1.1119	0	0	0	0.2870	-0.40	2.4983	108	-0.70	0
FBgn0026361	FBtr0088876	0.7083	2	2	2	0.4670	-8.70	2.5386	212	-8.80	0
FBgn0026369	FBtr0071641	0.4363	1	1	1	0.3690	-2.70	-0.1506	187	-2.30	0
FBgn0026370	FBtr0087383	0.6681	2	2	2	0.4754	-1.70	2.5908	366	-5.50	0
FBgn0026371	FBtr0078387	0.8427	1	1	1	0.3529	-4.80	-1.2719	136	-2.90	0
FBgn0026372	FBtr0072805	0.2534	0	0	0	0.2857	NA	1.5612	28	NA	NA
FBgn0026373	FBtr0080544	1.1814	0	0	0	0.4023	-0.60	1.3678	87	-4.20	0
FBgn0026375	FBtr0074481	0.4229	1	1	1	0.3243	-4.50	2.1514	74	-3.20	0
FBgn0026376	FBtr0075793	0.0562	0	0	0	0.4624	-0.70	-0.9155	772	-13.30	0
FBgn0026378	FBtr0086462	1.0265	0	0	0	0.3504	-0.10	1.5286	137	-9.70	0
FBgn0026379	FBtr0300562	0.0957	18	18	9	0.3568	-1.30	2.2907	911	-6.10	0
FBgn0026380	FBtr0082010	3.1661	0	0	0	0.4258	-4.70	2.0402	155	-2.80	0
FBgn0026393	FBtr0088887	0.0000	0	0	0	0.3934	-0.60	-2.8687	61	-1.80	0
FBgn0026400	FBtr0085320	0.7737	0	0	0	0.4627	-5.00	2.8980	67	-7.40	0
FBgn0026401	FBtr0111118	0.4199	2	2	2	0.3194	-5.20	0.9134	263	-7.50	0
FBgn0026402	FBtr0087058	1.4794	0	0	0	0.2747	-0.90	0.2366	91	-2.40	0
FBgn0026404	FBtr0076347	0.1277	0	0	0	0.4694	-8.90	-0.1595	409	-1.10	0
FBgn0026409	FBtr0075718	2.0013	0	0	0	0.5125	-2.20	2.9344	80	-3.60	0
FBgn0026415	FBtr0071393	1.6297	1	1	1	0.4186	-1.60	1.0610	43	-1.60	0
FBgn0026417	FBtr0078876	2.9365	0	0	0	0.4264	-2.70	2.7315	129	-5.60	0
FBgn0026418	FBtr0333051	3.0080	1	1	1	0.4179	-6.70	3.2757	560	-8.40	0
FBgn0026427	FBtr0087502	0.2008	4	4	4	0.4246	-5.30	-0.4677	252	-5.50	0
FBgn0026428	FBtr0307383	0.1455	0	0	0	0.5517	-4.20	-0.1759	145	-7.50	0
FBgn0026430	FBtr0074777	0.6657	1	1	1	0.5230	-5.50	-2.7785	457	-1.50	0
FBgn0026431	FBtr0080033	2.1468	1	1	1	0.3968	-0.80	2.9773	63	-7.30	0
FBgn0026432	FBtr0076061	1.0409	1	1	1	0.3636	-4.60	-1.5024	88	-10.60	0
FBgn0026433	FBtr0074075	0.0854	0	0	0	0.4250	-0.10	2.9202	80	-8.40	0
FBgn0026441	FBtr0334695	0.3070	2	2	2	0.4315	-4.20	0.1194	197	-7.70	0
FBgn0026479	FBtr0335173	0.8674	1	1	1	0.4843	-0.80	1.8496	159	-7.00	0
FBgn0026533	FBtr0100436	0.6517	1	1	1	0.4074	-4.80	1.9835	81	-6.80	0
FBgn0026566	FBtr0346140	0.4373	0	0	0	0.4623	-6.30	2.7600	106	-5.60	0
FBgn0026570	FBtr0346076	1.3775	3	3	3	0.3280	-1.80	1.6210	125	-5.90	0
FBgn0026573	FBtr0088042	0.2449	0	0	0	0.4493	-7.20	-0.3995	296	-5.30	0
FBgn0026575	FBtr0343571	0.0516	3	1	1	0.4566	-1.80	3.6665	449	-3.90	0
FBgn0026576	FBtr0084538	1.1921	0	0	0	0.4789	-9.30	2.9489	284	-8.20	0
FBgn0026577	FBtr0331677	0.1755	2	2	2	0.4583	-9.40	3.5264	240	-3.10	0
FBgn0026582	FBtr0071573	1.7215	1	1	1	0.3265	-1.00	2.5465	98	-2.30	0
FBgn0026593	FBtr0072912	0.7522	0	0	0	0.4026	-2.70	2.8948	231	-4.60	0
FBgn0026597	FBtr0085553	0.0397	8	8	5	0.4677	-8.30	-1.5711	1456	-5.60	0
FBgn0026598	FBtr0084552	0.1659	2	2	2	0.4856	-8.60	0.6844	208	-9.20	0
FBgn0026602	FBtr0089050	0.0681	2	2	2	0.4568	-4.90	1.5245	475	-3.30	0
FBgn0026616	FBtr0083179	0.0606	4	4	4	0.4459	-4.80	-0.5659	453	-7.70	0
FBgn0026619	FBtr0087862	0.2952	5	5	5	0.4579	-3.00	1.9626	356	-7.20	0
FBgn0026620	FBtr0302614	3.8946	2	2	2	0.4393	-9.90	-0.2014	173	-4.60	0
FBgn0026630	FBtr0075019	0.2290	1	1	1	0.4286	-2.60	0.0969	154	-7.00	0
FBgn0026634	FBtr0083114	0.2680	0	0	0	0.3625	-3.60	-0.0759	80	-5.70	0
FBgn0026666	FBtr0074084	0.3692	0	0	0	0.3737	-2.70	-1.6516	99	-6.60	0
FBgn0026679	FBtr0071234	0.5798	0	0	0	0.4458	-2.20	2.2229	83	-9.00	0
FBgn0026702	FBtr0070782	0.1725	1	1	1	0.4868	-4.30	-1.5976	76	-2.80	0
FBgn0026713	FBtr0073900	0.2527	1	1	1	0.5149	-1.40	0.8303	101	-4.80	0
FBgn0026718	FBtr0079703	0.7907	3	3	3	0.4293	-4.10	3.5023	403	-6.00	0
FBgn0026722	FBtr0088850	0.2589	0	0	0	0.4023	-3.00	0.6959	87	-5.80	0
FBgn0026737	FBtr0112926	0.6843	2	2	2	0.2472	-0.50	2.1689	89	-4.60	0
FBgn0026738	FBtr0075605	0.3328	0	0	0	0.2716	-0.30	2.9704	81	-3.60	0
FBgn0026741	FBtr0087852	0.9578	0	0	0	0.3833	-2.70	3.3149	120	-5.60	0
FBgn0026749	FBtr0073789	2.2576	0	0	0	0.4765	-9.60	3.3747	340	-4.50	0
FBgn0026751	FBtr0070763	0.6592	3	3	3	0.4071	-5.50	1.5638	226	-2.10	0
FBgn0026753	FBtr0083804	2.0236	0	0	0	0.4141	-1.70	0.0708	99	-8.10	0
FBgn0026761	FBtr0336666	0.6627	1	1	1	0.3900	-2.90	2.8845	100	-7.90	0
FBgn0026777	FBtr0333679	0.4658	3	3	3	0.3588	-1.50	2.3609	131	-5.00	0
FBgn0026778	FBtr0077747	0.5254	2	2	2	0.4935	-5.90	-0.3228	612	-3.00	0
FBgn0026787	FBtr0301452	1.1596	1	1	1	0.3556	-6.00	3.5435	90	-3.70	0
FBgn0026869	FBtr0089106	0.8504	10	10	10	0.3951	-2.60	-1.4890	577	-4.90	0
FBgn0026872	FBtr0339577	0.8908	0	0	0	0.5556	-1.70	-0.5468	189	-3.20	0
FBgn0026873	FBtr0070308	2.3364	1	1	1	0.3143	0.00	-1.5484	105	-0.50	0
FBgn0026876	FBtr0070245	0.1118	1	1	1	0.3529	-0.10	2.2547	102	-2.40	0
FBgn0026879	FBtr0070159	4.9808	0	0	0	0.4151	-0.90	-0.6792	53	-2.80	0
FBgn0027052	FBtr0080027	0.9773	2	2	2	0.3986	-5.20	0.7272	291	-4.50	0
FBgn0027053	FBtr0083292	1.7591	0	0	0	0.3500	-1.40	3.7318	80	-3.60	0
FBgn0027054	FBtr0301230	0.7374	0	0	0	0.3415	NA	0.9143	41	NA	0
FBgn0027055	FBtr0078269	2.0716	0	0	0	0.3839	-1.30	2.4722	112	-1.20	0
FBgn0027057	FBtr0075074	3.7204	0	0	0	0.3382	-3.90	0.1217	136	-4.70	0
FBgn0027066	FBtr0332939	2.2530	1	1	1	0.5000	-5.10	3.9273	102	-6.20	0
FBgn0027070	FBtr0081105	1.2952	0	0	0	0.5690	-3.90	1.4138	58	-9.60	0
FBgn0027079	FBtr0087735	2.1007	0	0	0	0.3220	-9.60	2.5671	59	-0.50	0
FBgn0027080	FBtr0075410	1.1799	0	0	0	0.3729	-5.80	4.2307	59	-9.20	0
FBgn0027081	FBtr0346436	1.9693	3	3	3	0.3750	-6.00	-1.1649	144	-3.80	0
FBgn0027082	FBtr0072948	0.7816	1	1	1	0.2843	0.00	2.8019	102	-3.60	0
FBgn0027083	FBtr0337021	1.9376	0	0	0	0.2262	-1.00	-1.1091	84	-1.50	0
FBgn0027084	FBtr0071366	0.4918	1	1	1	0.4776	-2.20	1.8993	134	-6.80	0
FBgn0027085	FBtr0073348	0.6244	1	1	1	0.3500	-3.50	-0.2859	100	-8.10	0
FBgn0027086	FBtr0078500	1.0979	0	0	0	0.5000	-4.90	1.2259	78	-9.20	0
FBgn0027087	FBtr0074593	0.9878	0	0	0	0.4938	-7.80	-0.1427	162	-7.50	0
FBgn0027088	FBtr0075632	2.3671	0	0	0	0.5276	-2.00	1.1601	290	-5.60	0
FBgn0027090	FBtr0084866	0.8145	0	0	0	0.4894	-6.30	1.1187	47	-2.70	0
FBgn0027091	FBtr0087234	2.8614	0	0	0	0.4382	-4.50	0.3926	89	-5.50	0
FBgn0027093	FBtr0074178	2.4862	1	1	0	0.4219	-0.40	2.2817	64	-9.30	0
FBgn0027094	FBtr0079721	4.1042	0	0	0	0.4421	-3.40	2.0293	95	-8.10	0
FBgn0027095	FBtr0083283	2.7952	1	1	1	0.3925	-0.50	4.2765	107	-1.90	0
FBgn0027101	FBtr0100406	0.4510	7	7	6	0.2983	0.00	0.6827	476	-6.30	0
FBgn0027108	FBtr0071006	1.4225	1	1	1	0.4856	-1.80	3.6665	243	-4.60	0
FBgn0027259	FBtr0073541	0.1961	0	0	0	0.4091	-4.70	0.7584	44	-3.90	0
FBgn0027279	FBtr0299525	0.8569	2	2	2	0.4086	-3.00	1.0662	487	-3.90	0
FBgn0027280	FBtr0071129	0.8534	0	0	0	0.4483	-2.50	0.3546	232	-8.50	0
FBgn0027287	FBtr0074042	0.5089	0	0	0	0.3875	-10.30	1.1067	320	-1.50	0
FBgn0027291	FBtr0307904	0.6486	0	0	0	0.4762	-5.70	2.3034	105	-10.50	0
FBgn0027296	FBtr0345316	0.1923	1	1	0	0.4953	-2.00	-2.0714	107	-4.10	0
FBgn0027329	FBtr0074086	3.0922	0	0	0	0.4228	-4.50	0.3878	123	-2.20	0
FBgn0027330	FBtr0071280	0.3050	0	0	0	0.4286	-6.60	0.4149	112	-4.00	0
FBgn0027334	FBtr0077298	2.5324	0	0	0	0.4831	-4.10	2.2753	89	-5.60	0
FBgn0027335	FBtr0343019	1.7100	0	0	0	0.4582	-5.30	-0.1270	347	-5.00	0
FBgn0027338	FBtr0082108	0.7417	0	0	0	0.3359	-2.50	3.8950	128	-3.90	0
FBgn0027342	FBtr0071018	0.2499	3	3	3	0.4571	-3.10	1.6162	700	-9.60	0
FBgn0027343	FBtr0070138	0.2075	0	0	0	0.4532	-4.90	1.7953	203	-6.70	0
FBgn0027348	FBtr0080590	0.8862	0	0	0	0.4199	0.00	2.6414	181	-5.20	0
FBgn0027356	FBtr0087828	2.0440	0	0	0	0.4293	-3.40	-2.4826	396	-5.20	0
FBgn0027358	FBtr0074767	1.4350	0	0	0	0.4018	-2.80	-2.3294	112	-5.10	0
FBgn0027359	FBtr0343640	2.8732	1	1	1	0.3956	-6.40	1.2084	91	-3.10	0
FBgn0027360	FBtr0071676	0.2584	3	3	1	0.5357	0.00	2.9299	280	-7.60	0
FBgn0027363	FBtr0080143	4.2230	0	0	0	0.4214	-8.60	3.1171	299	-0.70	0
FBgn0027375	FBtr0075715	0.4103	1	1	1	0.3511	-5.10	-0.4918	94	-8.20	0
FBgn0027378	FBtr0083125	0.9785	0	0	0	0.3947	-1.00	3.2006	76	-7.60	0
FBgn0027453	FBtr0080181	0.1520	2	2	2	0.5137	-3.30	1.6210	366	-2.40	1
FBgn0027490	FBtr0079707	0.2875	1	1	1	0.5105	-9.00	-0.9060	190	-5.90	0
FBgn0027492	FBtr0085203	0.8052	9	9	9	0.4925	-3.00	2.1277	1204	-4.90	0
FBgn0027493	FBtr0083991	0.6301	1	1	1	0.5522	-9.10	0.5607	134	-10.50	0
FBgn0027494	FBtr0085194	3.2677	0	0	0	0.3421	-2.00	2.5373	76	-2.80	0
FBgn0027495	FBtr0087983	1.4024	0	0	0	0.4813	-1.60	0.9366	320	-6.60	0
FBgn0027496	FBtr0079261	3.2795	0	0	0	0.3564	-3.20	2.8803	101	-5.50	0
FBgn0027497	FBtr0347493	0.2349	2	2	2	0.5684	-10.40	-1.1800	475	-7.40	0
FBgn0027498	FBtr0332383	0.4971	0	0	0	0.5090	-9.00	-0.1515	279	-4.20	0
FBgn0027499	FBtr0339467	1.1154	1	1	1	0.2967	-2.70	3.9293	91	-1.20	0
FBgn0027500	FBtr0075363	0.3818	0	0	0	0.4583	-5.40	0.8660	48	-3.30	0
FBgn0027503	FBtr0081959	0.2107	0	0	0	0.3964	-6.70	-3.0112	169	-1.50	0
FBgn0027504	FBtr0088017	0.6396	5	5	5	0.4085	-5.10	0.7821	306	-8.70	0
FBgn0027505	FBtr0080301	1.4694	0	0	0	0.4286	NA	-0.2801	28	NA	NA
FBgn0027506	FBtr0086958	0.6628	2	2	2	0.4424	-3.20	3.3149	486	-6.60	0
FBgn0027507	FBtr0331967	0.8371	0	0	0	0.4516	NA	-0.3190	31	NA	NA
FBgn0027508	FBtr0084890	0.4388	2	2	2	0.5110	-6.60	3.3304	499	-0.80	0
FBgn0027509	FBtr0077829	1.5459	0	0	0	0.4341	-9.60	0.3101	129	-8.80	0
FBgn0027512	FBtr0084476	0.9207	1	1	1	0.4074	-4.40	1.4801	108	0.00	0
FBgn0027513	FBtr0339310	0.7992	0	0	0	0.4066	-0.10	-0.0675	91	-7.60	0
FBgn0027514	FBtr0332175	0.3122	0	0	0	0.3721	-3.40	-1.3609	43	-3.40	0
FBgn0027515	FBtr0079523	0.4860	5	5	5	0.4387	-3.90	-2.1863	604	-1.40	0
FBgn0027518	FBtr0330297	0.3194	0	0	0	0.4301	-10.90	-0.2754	93	-2.60	0
FBgn0027521	FBtr0074222	0.6363	1	1	1	0.3500	-4.40	1.1067	120	-1.20	0
FBgn0027524	FBtr0082172	0.4390	0	0	0	0.3506	-1.00	2.2954	77	-7.40	0
FBgn0027525	FBtr0339475	0.1344	1	1	1	0.4103	-0.10	1.6640	78	-7.90	0
FBgn0027526	FBtr0084347	2.2606	1	1	1	0.3234	-4.60	1.6792	167	-1.20	0
FBgn0027528	FBtr0343364	1.0131	1	1	1	0.4476	-6.90	2.3034	143	-6.10	0
FBgn0027529	FBtr0301207	0.1739	1	1	1	0.3693	-5.00	2.8174	176	-3.70	0
FBgn0027532	FBtr0078486	0.1910	5	5	4	0.4779	-2.20	1.0431	226	-3.70	0
FBgn0027535	FBtr0086579	0.1027	1	1	1	0.4752	-2.00	-0.7636	101	-6.80	0
FBgn0027537	FBtr0073828	0.9245	0	0	0	0.5050	-4.40	1.7730	101	-11.60	0
FBgn0027538	FBtr0087539	0.0371	1	1	1	0.4925	-8.40	-0.0576	134	-4.00	0
FBgn0027539	FBtr0084739	0.4812	4	4	3	0.4171	-6.50	-1.2807	362	-4.30	0
FBgn0027547	FBtr0072853	0.8103	2	2	2	0.4156	-1.80	0.8680	462	-0.80	0
FBgn0027548	FBtr0088857	0.7835	0	0	0	0.4419	-8.20	-2.9114	215	-5.80	0
FBgn0027549	FBtr0334615	0.6814	0	0	0	0.4427	-5.90	-0.2492	131	-10.10	0
FBgn0027552	FBtr0073171	2.1929	0	0	0	0.5455	NA	2.5528	33	NA	NA
FBgn0027553	FBtr0071077	0.2370	0	0	0	0.4103	-4.40	-3.5310	78	-5.30	0
FBgn0027554	FBtr0076766	1.4264	0	0	0	0.4000	-1.60	2.4706	90	-4.70	0
FBgn0027558	FBtr0089061	0.0982	4	4	4	0.4920	-5.90	1.9519	376	-2.70	0
FBgn0027559	FBtr0303164	1.9465	0	0	0	0.3171	NA	2.3378	41	NA	0
FBgn0027561	FBtr0088626	0.3261	3	3	3	0.4949	-3.30	2.5252	394	-7.60	0
FBgn0027564	FBtr0070846	0.2192	0	0	0	0.4714	-11.40	-2.0650	140	-5.80	0
FBgn0027565	FBtr0078238	0.8101	1	1	1	0.3372	-1.10	1.9435	86	-1.00	0
FBgn0027567	FBtr0076339	0.2275	0	0	0	0.3659	-5.20	1.7607	205	-3.50	0
FBgn0027568	FBtr0332198	1.3915	0	0	0	0.3300	-2.80	0.0162	200	-4.10	0
FBgn0027569	FBtr0345035	0.3323	0	0	0	0.5667	NA	-0.0317	30	NA	NA
FBgn0027570	FBtr0333922	21.7269	1	1	1	0.4177	-4.20	2.5864	316	-4.30	0
FBgn0027571	FBtr0077659	5.2763	0	0	0	0.5222	-1.90	1.7565	630	-4.90	0
FBgn0027572	FBtr0089548	1.0906	3	3	3	0.4540	-2.70	3.3394	326	-4.00	0
FBgn0027574	FBtr0085106	0.1673	1	1	1	0.3387	-3.90	3.8539	62	-4.00	0
FBgn0027579	FBtr0335011	0.3146	2	2	2	0.5556	-4.80	1.5572	216	-11.70	0
FBgn0027580	FBtr0300850	1.3761	0	0	0	0.5029	-5.50	1.3414	346	-7.80	0
FBgn0027581	FBtr0330617	0.2730	4	4	3	0.4080	-5.40	-1.7050	880	-5.50	0
FBgn0027582	FBtr0080228	0.6618	1	1	1	0.4054	-6.60	-1.5995	148	-4.00	0
FBgn0027583	FBtr0085544	2.1102	1	1	1	0.4255	-6.60	2.1678	94	-7.40	0
FBgn0027587	FBtr0072528	0.6902	1	1	1	0.3960	-4.80	1.6403	149	-2.20	0
FBgn0027588	FBtr0070059	2.6036	0	0	0	0.4191	-10.80	0.2839	136	-11.60	0
FBgn0027590	FBtr0072436	3.9679	0	0	0	0.4578	-6.80	1.6731	83	-6.60	0
FBgn0027592	FBtr0078062	1.6218	1	1	1	0.3500	-2.50	2.3602	100	-5.40	0
FBgn0027594	FBtr0072799	2.1655	4	4	4	0.3953	-7.30	2.0639	716	-6.40	0
FBgn0027597	FBtr0077903	0.2724	0	0	0	0.4330	-1.30	-0.8989	97	-10.60	0
FBgn0027598	FBtr0085704	0.2984	3	3	2	0.4557	-11.10	1.3166	654	-3.80	0
FBgn0027599	FBtr0072409	0.3658	0	0	0	0.2000	NA	2.2618	25	NA	NA
FBgn0027601	FBtr0073972	3.7111	0	0	0	0.4867	-2.20	0.1681	150	-11.90	0
FBgn0027602	FBtr0074439	0.4224	0	0	0	0.3883	-9.50	4.2481	103	-7.00	0
FBgn0027603	FBtr0074693	1.2225	0	0	0	0.4011	-6.90	-2.4733	187	-4.00	0
FBgn0027605	FBtr0074504	2.2386	0	0	0	0.4268	-5.00	3.0295	164	-2.90	0
FBgn0027607	FBtr0088674	0.2637	0	0	0	0.5479	-5.10	0.4689	73	-1.40	0
FBgn0027609	FBtr0077457	0.3185	0	0	0	0.3425	-1.60	2.1668	73	-5.20	0
FBgn0027610	FBtr0082747	0.1624	1	1	1	0.4968	-4.20	2.5873	314	-8.10	0
FBgn0027611	FBtr0080031	1.4347	2	2	2	0.4072	-6.40	0.0329	194	-12.90	0
FBgn0027615	FBtr0076272	0.3947	0	0	0	0.3692	-2.10	1.5687	65	-2.20	0
FBgn0027616	FBtr0073078	0.4940	0	0	0	0.4191	-9.30	-2.9647	136	-9.20	0
FBgn0027617	FBtr0084738	0.1761	0	0	0	0.3818	-2.60	2.0647	55	-1.20	0
FBgn0027619	FBtr0339425	0.4055	0	0	0	0.4936	-0.90	2.5481	156	-6.20	0
FBgn0027620	FBtr0085845	0.4254	1	1	1	0.4548	-0.50	1.8407	387	-4.40	0
FBgn0027621	FBtr0339440	1.3351	0	0	0	0.4179	-11.20	0.5762	402	-3.10	0
FBgn0027655	FBtr0336788	0.9510	1	1	1	0.3444	-8.10	2.8281	90	-2.30	0
FBgn0027657	FBtr0083247	0.7144	2	2	2	0.4286	-1.40	3.2488	455	-6.70	0
FBgn0027660	FBtr0075232	0.4954	3	3	3	0.4647	-0.70	-2.5361	170	-10.80	0
FBgn0027779	FBtr0335143	4.0646	0	0	0	0.4250	-3.60	3.5743	160	-5.60	0
FBgn0027780	FBtr0089673	0.2422	1	1	1	0.4539	-14.40	-3.7524	152	-11.40	0
FBgn0027783	FBtr0087461	1.5646	0	0	0	0.4141	-0.80	3.7226	99	-8.00	0
FBgn0027784	FBtr0083717	0.6453	0	0	0	0.3333	-6.60	-0.9151	78	-4.20	0
FBgn0027785	FBtr0083712	1.3647	0	0	0	0.4625	-4.00	0.5820	80	-6.70	0
FBgn0027786	FBtr0305544	0.4527	0	0	0	0.5203	-1.70	1.1701	123	-5.50	0
FBgn0027791	FBtr0070296	0.0375	0	0	0	0.3529	NA	2.5430	17	NA	NA
FBgn0027793	FBtr0070298	0.0000	0	0	0	0.5806	NA	0.3913	31	NA	NA
FBgn0027794	FBtr0070230	0.2321	0	0	0	0.3559	-2.30	2.9578	59	-8.70	0
FBgn0027835	FBtr0086682	2.0168	0	0	0	0.3701	-5.70	-0.3426	154	-7.00	0
FBgn0027836	FBtr0086774	0.5151	1	1	1	0.4407	-0.10	2.3430	177	-2.10	0
FBgn0027841	FBtr0083660	3.9639	0	0	0	0.3448	-6.50	0.9359	87	-4.10	0
FBgn0027843	FBtr0076001	0.2584	0	0	0	0.5225	-5.00	1.8935	222	-12.20	0
FBgn0027864	FBtr0071223	0.1473	2	2	1	0.3230	-3.50	-2.9844	161	-3.10	0
FBgn0027865	FBtr0330164	0.1235	2	2	1	0.4133	-2.40	0.5418	346	-8.40	0
FBgn0027866	FBtr0078956	0.3151	0	0	0	0.2857	-2.00	-3.2428	42	-2.00	0
FBgn0027868	FBtr0080121	0.6196	1	1	1	0.4365	-6.40	0.8680	126	-5.10	0
FBgn0027872	FBtr0086888	0.1066	0	0	0	0.4444	-7.10	2.8522	108	-9.80	0
FBgn0027873	FBtr0085357	0.7538	1	1	1	0.4111	-3.80	3.5435	90	-4.80	0
FBgn0027885	FBtr0081001	1.9583	0	0	0	0.4269	-3.60	2.0225	171	-4.70	0
FBgn0027889	FBtr0085096	0.8368	1	1	1	0.5347	-2.60	-0.5796	101	-10.30	0
FBgn0027903	FBtr0072775	1.5794	0	0	0	0.3750	-1.10	0.6718	48	-1.20	0
FBgn0027930	FBtr0078903	4.2733	0	0	0	0.4810	-6.20	2.6543	79	-6.30	0
FBgn0027932	FBtr0340240	2.9521	0	0	0	0.4475	-2.70	3.8492	181	-3.60	0
FBgn0027945	FBtr0078412	0.3858	0	0	0	0.4608	-6.10	1.9092	204	-2.00	0
FBgn0027948	FBtr0304803	2.4741	3	3	3	0.5229	-3.20	3.3004	109	-6.80	0
FBgn0027949	FBtr0081258	1.0928	1	1	1	0.3711	-6.30	3.2504	97	-6.60	0
FBgn0027950	FBtr0082069	0.8752	0	0	0	0.4938	-5.10	-0.8877	81	-12.10	0
FBgn0027951	FBtr0078734	0.5872	4	4	3	0.4019	-6.00	2.8543	214	0.00	0
FBgn0028292	FBtr0071317	1.1759	0	0	0	0.4109	-7.50	1.8363	129	-6.20	0
FBgn0028325	FBtr0070711	1.3922	0	0	0	0.4300	-2.10	2.2702	207	-3.50	0
FBgn0028327	FBtr0343412	1.0924	0	0	0	0.5137	-2.10	3.1130	146	-7.30	0
FBgn0028331	FBtr0347009	1.8198	0	0	0	0.4194	-4.70	2.6024	62	-4.50	0
FBgn0028336	FBtr0070953	1.0217	0	0	0	0.3774	-3.10	1.7385	106	0.00	0
FBgn0028341	FBtr0333427	0.0898	1	1	0	0.5621	-9.40	-2.5839	322	-5.30	0
FBgn0028342	FBtr0332896	2.9335	0	0	0	0.4144	-2.50	3.3196	111	-4.50	0
FBgn0028343	FBtr0301415	0.7452	0	0	0	0.3846	NA	-2.7887	39	NA	NA
FBgn0028360	FBtr0343377	0.1179	3	3	3	0.5032	-3.90	2.6180	308	-6.30	0
FBgn0028369	FBtr0309501	0.2604	0	0	0	0.4194	-4.70	2.1543	999	-2.10	0
FBgn0028372	FBtr0086473	0.3104	2	2	2	0.3431	-4.80	2.3846	137	-4.70	0
FBgn0028375	FBtr0080852	0.2379	2	2	2	0.4853	-6.40	-0.5065	546	-3.10	0
FBgn0028377	FBtr0091756	1.1381	0	0	0	0.3173	-2.10	-1.0852	104	-2.00	0
FBgn0028380	FBtr0290284	0.2294	4	4	3	0.4910	-1.60	-3.9666	332	-5.60	0
FBgn0028382	FBtr0086945	0.9888	1	1	1	0.2537	-2.30	1.6494	67	-2.70	0
FBgn0028387	FBtr0079443	0.3492	0	0	0	0.3444	-1.60	4.2544	90	-1.40	0
FBgn0028394	FBtr0079689	2.7871	0	0	0	0.4109	-2.10	4.0480	202	-2.20	0
FBgn0028397	FBtr0310446	0.1422	6	6	6	0.3688	-4.20	2.5330	968	-5.80	0
FBgn0028398	FBtr0077717	1.3954	0	0	0	0.3077	-0.20	3.3067	91	-0.90	0
FBgn0028399	FBtr0310551	5.7289	0	0	0	0.2846	-8.00	2.9489	123	-1.60	0
FBgn0028402	FBtr0078288	0.5348	0	0	0	0.4062	-2.80	0.0553	64	-10.30	0
FBgn0028406	FBtr0080478	0.6388	1	1	1	0.4151	-4.90	1.5066	53	-2.50	0
FBgn0028408	FBtr0332998	0.2254	0	0	0	0.5294	NA	-3.4275	17	NA	NA
FBgn0028411	FBtr0072241	1.6414	0	0	0	0.4815	NA	2.8396	27	NA	NA
FBgn0028421	FBtr0289954	0.1777	0	0	0	NA	NA	NA		NA	NA
FBgn0028424	FBtr0087139	2.2791	0	0	0	0.5385	-12.50	2.8459	52	-10.10	0
FBgn0028425	FBtr0089656	0.6573	1	1	1	0.5135	-2.90	1.3543	111	-9.40	0
FBgn0028426	FBtr0088360	0.1437	1	1	1	0.4656	-1.40	-1.7448	131	-8.10	0
FBgn0028427	FBtr0078305	0.7453	1	1	1	0.3436	-4.80	3.8990	163	-11.60	0
FBgn0028429	FBtr0076370	1.6212	1	1	1	0.4470	-3.20	0.0711	302	-6.00	0
FBgn0028434	FBtr0087448	3.2586	0	0	0	0.2083	NA	3.2511	24	NA	NA
FBgn0028436	FBtr0078647	0.8867	1	1	1	0.2791	0.00	2.8743	86	-8.70	0
FBgn0028467	FBtr0079297	0.1600	0	0	0	0.3867	-1.00	-1.5976	75	-5.90	0
FBgn0028468	FBtr0084009	0.3075	1	1	1	0.5155	-1.70	2.7094	161	-9.30	0
FBgn0028471	FBtr0084633	0.1808	3	3	3	0.3804	-2.50	3.1706	163	-8.60	0
FBgn0028473	FBtr0300649	0.1026	0	0	0	0.4369	-5.20	2.7552	103	-10.30	0
FBgn0028474	FBtr0340463	0.4136	0	0	0	0.5028	-7.20	2.1324	354	-11.60	0
FBgn0028475	FBtr0084467	0.3743	0	0	0	0.4723	-7.10	0.4112	379	-5.60	0
FBgn0028476	FBtr0333818	0.3967	6	6	6	0.4701	-2.50	1.4036	268	-2.20	0
FBgn0028479	FBtr0079858	3.1330	1	1	1	0.3750	-4.30	1.0630	176	-9.80	0
FBgn0028480	FBtr0071444	0.1262	2	2	2	0.5954	-11.60	0.0711	304	-8.20	0
FBgn0028484	FBtr0073211	0.1372	3	3	3	0.4769	-12.40	1.1046	801	-4.30	1
FBgn0028487	FBtr0082847	0.1022	0	0	0	0.5267	-4.60	1.8884	243	-9.10	0
FBgn0028490	FBtr0345719	1.3882	0	0	0	0.4651	-4.30	2.1696	86	-7.40	0
FBgn0028494	FBtr0340273	0.1356	7	7	7	0.4723	-6.70	-1.1927	1571	-7.90	0
FBgn0028497	FBtr0072028	1.1000	1	1	1	0.4254	-2.50	2.9097	228	-4.60	0
FBgn0028499	FBtr0336469	0.6252	1	1	1	0.3917	-0.90	-4.3440	120	-2.80	0
FBgn0028500	FBtr0078512	0.1737	2	2	2	0.4516	-3.40	-1.6489	186	-5.30	0
FBgn0028504	FBtr0344989	0.6083	0	0	0	0.4577	-5.50	2.5165	260	-8.20	0
FBgn0028506	FBtr0080836	1.7110	0	0	0	0.4720	-2.20	3.3256	161	-5.80	0
FBgn0028507	FBtr0305560	0.4927	0	0	0	0.4808	-4.50	0.9186	156	-5.50	0
FBgn0028509	FBtr0080546	0.3193	3	3	3	0.4118	0.00	0.5433	493	-5.60	0
FBgn0028515	FBtr0331443	3.5071	0	0	0	0.3945	-2.50	-1.1119	109	-5.00	0
FBgn0028516	FBtr0080714	1.3036	0	0	0	0.3583	-1.40	1.8843	120	-3.90	0
FBgn0028523	FBtr0340234	5.0197	0	0	0	0.6061	NA	0.1281	33	NA	NA
FBgn0028525	FBtr0080830	0.1125	2	2	2	0.3068	-5.70	1.6155	88	-3.90	0
FBgn0028527	FBtr0331333	9.7002	1	1	1	0.4485	-2.90	1.9562	301	-14.00	0
FBgn0028530	FBtr0080641	2.1779	0	0	0	0.3214	-4.00	-0.6669	84	-6.30	0
FBgn0028538	FBtr0080537	0.2985	2	2	2	0.5291	-10.80	0.9782	327	-3.60	0
FBgn0028539	FBtr0110941	0.6924	1	1	1	0.2907	-0.10	2.4339	86	-4.30	0
FBgn0028540	FBtr0080576	1.3848	0	0	0	0.4573	-4.60	4.2587	433	-7.10	0
FBgn0028541	FBtr0080532	1.3450	0	0	0	0.4178	-4.00	1.6190	146	-2.00	0
FBgn0028546	FBtr0342905	1.6938	0	0	0	0.4167	NA	2.8803	24	NA	NA
FBgn0028550	FBtr0070244	3.8602	6	6	6	0.4489	-3.70	0.6283	1408	-10.50	0
FBgn0028552	FBtr0072187	3.0437	0	0	0	0.3429	-2.10	2.2808	70	0.00	0
FBgn0028554	FBtr0332328	0.7239	2	2	2	0.4664	-5.50	2.3179	268	-4.60	0
FBgn0028563	FBtr0088777	0.3248	0	0	0	0.5142	-4.80	-1.9327	317	-6.00	0
FBgn0028577	FBtr0072709	1.3803	0	0	0	0.3719	-4.40	2.8281	121	-4.80	0
FBgn0028579	FBtr0086125	0.3650	3	3	3	0.4793	-1.50	0.0570	290	-5.60	0
FBgn0028581	FBtr0303848	3.1072	0	0	0	0.3228	-4.40	0.0999	127	-4.00	0
FBgn0028582	FBtr0112941	1.4008	1	1	0	0.4465	-2.50	-0.0535	439	-1.50	0
FBgn0028622	FBtr0086258	1.4227	0	0	0	0.5207	-4.20	1.5223	121	-9.80	0
FBgn0028646	FBtr0085694	1.8235	1	1	1	0.4901	-2.70	-0.1376	151	-5.10	0
FBgn0028647	FBtr0300735	0.1262	1	1	1	0.3497	-7.00	2.8898	143	-5.60	0
FBgn0028648	FBtr0076891	1.8596	1	1	1	0.4545	-5.40	-1.8888	44	-5.40	0
FBgn0028658	FBtr0331627	2.3853	0	0	0	0.2917	NA	3.6965	24	NA	NA
FBgn0028662	FBtr0083005	2.7818	1	1	1	0.4154	-1.20	3.1352	130	-2.20	0
FBgn0028663	FBtr0078369	3.6159	0	0	0	0.4444	-3.80	3.9016	126	-6.50	0
FBgn0028664	FBtr0073256	3.4174	0	0	0	0.3299	-0.50	1.7137	97	-1.20	0
FBgn0028665	FBtr0070611	1.5670	1	1	1	0.4772	-2.00	3.1629	241	0.00	0
FBgn0028670	FBtr0083657	1.2448	0	0	0	0.4135	-7.00	3.0846	237	-4.40	0
FBgn0028671	FBtr0085374	1.2227	0	0	0	0.3922	-3.80	3.3241	102	-3.30	0
FBgn0028683	FBtr0087840	0.6549	0	0	0	0.3523	-1.20	1.9591	88	-8.70	0
FBgn0028684	FBtr0084452	2.3167	0	0	0	0.3623	-1.00	1.8026	138	-9.00	0
FBgn0028685	FBtr0305495	3.6947	0	0	0	0.4180	-7.60	3.1130	122	-9.50	0
FBgn0028686	FBtr0073436	2.4589	0	0	0	0.4146	-0.90	1.2172	82	-9.60	0
FBgn0028687	FBtr0088947	2.3230	1	1	1	0.3846	-0.70	1.0777	117	-1.10	0
FBgn0028688	FBtr0084294	3.7520	1	1	1	0.3333	-0.90	3.6703	132	-5.30	0
FBgn0028689	FBtr0087475	7.9442	0	0	0	0.4160	-0.30	2.3831	238	-4.80	0
FBgn0028690	FBtr0078629	1.3906	0	0	0	0.3661	-3.10	3.6820	224	0.00	0
FBgn0028691	FBtr0084470	1.9956	0	0	0	0.3774	-3.00	-1.1551	106	-9.40	0
FBgn0028692	FBtr0085385	1.3246	0	0	0	0.3667	-1.90	2.1523	120	-2.30	0
FBgn0028693	FBtr0075308	5.9529	0	0	0	0.2917	0.00	1.7795	72	-3.30	0
FBgn0028694	FBtr0079027	1.9498	0	0	0	0.4176	-1.60	2.4485	170	-8.90	0
FBgn0028695	FBtr0074893	2.8209	0	0	0	0.4071	-1.90	0.9791	140	-5.80	0
FBgn0028697	FBtr0113742	0.3027	0	0	0	0.3913	-3.70	1.3308	46	-3.00	0
FBgn0028700	FBtr0080225	2.3131	1	1	1	0.3288	-2.40	3.2274	146	-2.30	0
FBgn0028703	FBtr0273248	0.7167	6	6	6	0.5355	-8.80	0.5829	409	-5.10	0
FBgn0028707	FBtr0342603	0.6199	0	0	0	0.1667	NA	3.2504	36	NA	NA
FBgn0028708	FBtr0081969	2.2603	1	1	1	0.4714	-8.70	-1.3117	140	-6.50	0
FBgn0028717	FBtr0339162	0.1434	1	1	1	0.4784	-10.00	0.5039	278	-8.00	0
FBgn0028734	FBtr0082197	0.9468	0	0	0	0.5035	-7.40	0.5987	568	0.00	0
FBgn0028737	FBtr0345627	0.4397	0	0	0	0.4556	-2.90	2.8533	90	-7.00	0
FBgn0028738	FBtr0072426	0.0000	0	0	0	0.5417	NA	1.5699	24	NA	NA
FBgn0028741	FBtr0089554	0.6894	4	4	4	0.5083	0.00	3.1927	480	-1.90	0
FBgn0028743	FBtr0301142	0.0000	6	6	3	0.4689	-7.50	-0.3943	1689	-6.50	0
FBgn0028744	FBtr0089550	0.3150	0	0	0	0.5000	-4.30	3.5743	68	-8.30	0
FBgn0028746	FBtr0345708	1.2203	0	0	0	0.3173	-4.90	2.2474	104	-0.70	0
FBgn0028833	FBtr0084976	1.8820	0	0	0	0.4804	-3.80	-2.3150	102	-10.30	0
FBgn0028836	FBtr0088742	6.5558	0	0	0	0.3077	-0.50	4.3264	78	-2.40	0
FBgn0028837	FBtr0084265	2.3657	0	0	0	0.4098	-2.40	1.4679	122	-1.90	0
FBgn0028886	FBtr0300845	16.7660	0	0	0	0.4230	-3.80	1.9772	487	-9.10	0
FBgn0028894	FBtr0080851	2.7898	0	0	0	0.3757	-0.60	-1.2556	181	-8.30	0
FBgn0028895	FBtr0080829	0.5187	0	0	0	0.3299	-4.90	3.1313	97	-7.40	0
FBgn0028897	FBtr0080825	1.2271	0	0	0	0.3051	-5.30	1.3551	59	-3.30	0
FBgn0028916	FBtr0343674	0.9940	1	1	1	0.4118	-3.90	2.5252	153	-4.30	0
FBgn0028919	FBtr0080540	0.6541	1	1	1	0.3171	-3.40	1.6949	123	-0.50	0
FBgn0028926	FBtr0080695	0.6132	0	0	0	0.4190	-2.90	0.6616	105	-6.50	0
FBgn0028931	FBtr0110942	0.9815	1	1	1	0.2899	-3.30	-0.0403	69	-1.30	0
FBgn0028932	FBtr0329825	1.8301	0	0	0	0.0435	NA	2.4880	23	NA	NA
FBgn0028952	FBtr0310547	0.5159	1	1	1	0.3017	-0.80	3.1970	116	-4.90	0
FBgn0028953	FBtr0086921	0.2928	1	1	1	0.4896	-1.10	-0.4923	911	-6.40	0
FBgn0028955	FBtr0088581	3.9517	3	3	3	0.5109	-10.20	1.9203	505	-3.30	0
FBgn0028956	FBtr0086955	1.3975	0	0	0	0.3557	-6.20	0.8481	149	-8.20	0
FBgn0028962	FBtr0077168	0.6094	0	0	0	0.4845	-12.00	-0.7913	97	-10.10	0
FBgn0028965	FBtr0080427	0.3995	2	2	2	0.4328	-1.30	0.1151	134	-4.20	0
FBgn0028968	FBtr0085793	3.1300	0	0	0	0.4479	-2.70	2.2620	96	-7.50	0
FBgn0028969	FBtr0301926	1.0505	0	0	0	0.5181	-2.30	4.2987	193	-1.30	0
FBgn0028970	FBtr0077631	0.9089	0	0	0	0.4737	-3.50	0.3913	152	-7.80	0
FBgn0028974	FBtr0074404	0.9518	0	0	0	0.3478	0.00	-2.5617	92	-3.40	0
FBgn0028978	FBtr0078235	0.6242	2	2	2	0.4266	-4.20	1.1164	354	-4.00	0
FBgn0028980	FBtr0333390	0.8097	4	4	4	0.3460	-1.90	1.3622	315	-6.30	0
FBgn0028982	FBtr0070896	0.1738	0	0	0	0.3182	-1.20	-0.9749	110	-0.30	0
FBgn0028983	FBtr0086733	1.3502	0	0	0	0.5376	0.00	1.7763	93	-7.20	0
FBgn0028984	FBtr0083141	5.2928	0	0	0	0.4602	-7.50	0.3538	113	-6.60	0
FBgn0028990	FBtr0079321	0.6770	0	0	0	0.5640	-5.30	-1.0333	172	-4.80	0
FBgn0028991	FBtr0100501	0.2738	0	0	0	0.3889	-7.30	-5.9494	558	-3.60	0
FBgn0028992	FBtr0083436	5.2021	0	0	0	0.3473	0.00	-0.0619	262	-4.40	0
FBgn0028997	FBtr0082083	0.4323	1	1	1	0.4155	-2.00	0.8633	142	-5.50	0
FBgn0029002	FBtr0072506	2.3212	2	2	2	0.4615	-2.50	-1.2057	169	-9.70	0
FBgn0029006	FBtr0086833	0.0676	4	4	2	0.4369	0.00	0.1229	904	-3.60	0
FBgn0029067	FBtr0077226	0.2692	3	3	3	0.4244	-1.30	-1.8133	780	-3.80	0
FBgn0029079	FBtr0086832	0.9780	0	0	0	0.2899	-3.40	3.2504	69	-3.80	0
FBgn0029088	FBtr0078665	0.1515	2	2	2	0.4739	-1.80	0.5854	403	-9.70	0
FBgn0029092	FBtr0088549	0.9550	1	1	1	0.5258	-3.10	2.3711	97	-7.90	0
FBgn0029093	FBtr0088898	9.0030	0	0	0	0.3786	-2.30	3.6965	103	-2.40	0
FBgn0029094	FBtr0074947	4.6404	1	1	1	0.4211	-4.50	0.3352	285	-5.50	0
FBgn0029095	FBtr0078031	1.6925	2	2	2	0.4731	-8.90	2.5981	372	-7.60	0
FBgn0029113	FBtr0076734	1.2834	0	0	0	0.4035	0.00	2.4339	114	-4.50	0
FBgn0029114	FBtr0075607	0.5592	4	4	4	0.3884	-4.20	2.5430	502	-7.10	0
FBgn0029117	FBtr0076897	0.4310	1	1	1	0.2644	0.00	-0.4744	87	-3.00	0
FBgn0029118	FBtr0077134	0.3714	0	0	0	0.4054	-5.50	2.5267	148	-8.60	0
FBgn0029121	FBtr0077083	0.1860	1	1	1	0.3908	-3.80	-2.8287	87	-11.10	0
FBgn0029128	FBtr0340057	0.7898	0	0	0	0.4458	-1.70	1.3939	673	-4.40	0
FBgn0029131	FBtr0086108	0.0699	3	3	3	0.5440	-11.30	1.1863	625	-2.80	0
FBgn0029133	FBtr0310646	1.0071	1	1	1	0.4734	-5.80	2.2681	207	-2.00	0
FBgn0029134	FBtr0088224	2.2478	0	0	0	0.4062	NA	1.8293	32	NA	NA
FBgn0029137	FBtr0080362	0.2561	0	0	0	0.5022	-13.50	-0.0892	225	-4.00	0
FBgn0029148	FBtr0333076	2.5157	0	0	0	0.3846	-2.10	1.9282	78	-6.10	0
FBgn0029152	FBtr0078383	1.4816	2	2	2	0.4319	-3.20	2.5908	213	-4.40	0
FBgn0029155	FBtr0301708	0.2064	0	0	0	0.4561	-0.90	3.7226	228	-1.80	0
FBgn0029157	FBtr0084799	0.2799	3	3	3	0.5456	-9.90	0.0654	482	-4.30	1
FBgn0029158	FBtr0290266	0.5402	2	2	2	0.2574	-1.00	-1.6737	101	-1.20	0
FBgn0029161	FBtr0343130	0.4226	0	0	0	0.5256	-6.20	1.7339	234	-6.10	0
FBgn0029173	FBtr0332008	0.5438	2	2	2	0.3852	-6.00	0.5129	122	-4.60	0
FBgn0029174	FBtr0079872	2.9132	0	0	0	0.4667	-3.70	2.5430	45	-5.80	0
FBgn0029175	FBtr0100513	0.7240	1	1	1	0.2903	0.00	2.8711	62	-6.20	0
FBgn0029176	FBtr0085393	0.4670	0	0	0	0.5152	NA	2.6063	33	NA	NA
FBgn0029502	FBtr0070963	1.4779	0	0	0	0.3931	-3.40	1.2516	145	-5.70	0
FBgn0029503	FBtr0084554	2.7079	0	0	0	0.2975	0.00	1.7399	121	-2.20	0
FBgn0029504	FBtr0112946	0.6199	0	0	0	0.3636	-3.30	-0.4211	187	-4.60	0
FBgn0029506	FBtr0086180	9.7629	0	0	0	0.3868	-0.60	3.4923	106	-6.80	0
FBgn0029512	FBtr0082593	2.1588	0	0	0	0.2747	-5.80	1.9953	91	-11.60	0
FBgn0029514	FBtr0310160	0.9756	0	0	0	0.3000	-0.30	3.3394	70	-0.10	0
FBgn0029522	FBtr0112947	1.6662	0	0	0	0.3681	-2.60	1.3630	163	-3.70	0
FBgn0029524	FBtr0343501	5.2965	0	0	0	0.3514	-2.90	3.6965	74	-6.50	0
FBgn0029525	FBtr0070094	0.3662	0	0	0	0.3663	-3.40	3.2149	101	-6.50	0
FBgn0029529	FBtr0070160	3.0240	0	0	0	0.3857	-3.10	2.9299	70	-2.60	0
FBgn0029588	FBtr0089694	0.0000	0	0	0	0.5874	-7.00	-1.4856	269	-7.50	0
FBgn0029594	FBtr0331384	0.5047	0	0	0	0.4762	-3.30	2.8420	42	-3.30	0
FBgn0029603	FBtr0331383	0.0000	0	0	0	0.5092	-12.50	0.2854	434	0.00	0
FBgn0029629	FBtr0070446	0.8100	0	0	0	0.3626	-3.60	1.6423	91	-2.90	0
FBgn0029648	FBtr0332493	0.3369	0	0	0	0.3889	-4.00	0.3607	72	-2.80	0
FBgn0029664	FBtr0070568	0.5830	1	1	1	0.4125	-4.00	1.7617	80	-3.10	0
FBgn0029665	FBtr0070590	0.9705	0	0	0	0.3936	-4.70	-1.0675	94	-1.10	0
FBgn0029666	FBtr0070569	0.8909	2	2	2	0.4293	-9.10	-0.4915	191	-3.60	0
FBgn0029672	FBtr0333793	1.4093	1	1	1	0.4017	-3.20	2.1282	117	-7.20	0
FBgn0029676	FBtr0333764	5.9564	0	0	0	0.3968	-5.10	2.4788	63	-4.00	0
FBgn0029685	FBtr0345712	0.1525	2	2	2	0.4957	-23.10	0.0553	230	-11.00	1
FBgn0029686	FBtr0345711	0.6791	0	0	0	0.3016	-5.20	1.1053	305	-0.50	0
FBgn0029687	FBtr0070616	2.8772	1	1	1	0.4109	-4.10	2.9947	567	-2.10	0
FBgn0029688	FBtr0342740	0.3186	1	1	1	0.3992	-2.20	2.2857	253	-4.90	0
FBgn0029689	FBtr0070625	0.2564	3	3	3	0.4593	0.00	-0.9749	418	-3.90	0
FBgn0029693	FBtr0343297	0.0783	1	1	1	0.4205	-3.00	3.0952	390	-5.40	0
FBgn0029706	FBtr0070652	0.6547	0	0	0	0.4620	-7.20	2.8845	171	-3.30	0
FBgn0029709	FBtr0343566	2.5678	0	0	0	0.4211	-0.10	1.3912	95	-3.00	0
FBgn0029710	FBtr0070676	0.7312	0	0	0	0.4384	-5.50	-0.9021	73	-4.90	0
FBgn0029711	FBtr0070701	0.0823	2	2	2	0.4836	-11.90	2.6195	366	-13.80	0
FBgn0029712	FBtr0070677	0.7451	0	0	0	0.2500	NA	NA	4	NA	NA
FBgn0029713	FBtr0070699	0.5126	0	0	0	0.3944	-5.60	2.0860	71	-4.30	0
FBgn0029714	FBtr0070678	0.9831	0	0	0	0.3495	-1.30	0.8903	103	-7.90	0
FBgn0029715	FBtr0070698	1.9022	0	0	0	0.4140	-5.30	1.1558	215	-5.60	0
FBgn0029718	FBtr0070682	0.9405	0	0	0	0.3438	0.00	1.7575	96	-5.20	0
FBgn0029723	FBtr0100551	0.1654	0	0	0	0.5249	-27.52	-0.3758	341	-7.70	1
FBgn0029733	FBtr0070721	0.2754	0	0	0	0.3038	-4.10	1.3622	79	-9.70	0
FBgn0029736	FBtr0300998	0.1526	1	1	1	0.4000	-9.50	0.2637	125	-5.20	0
FBgn0029737	FBtr0070723	0.9606	4	4	3	0.3983	-3.40	2.6135	467	-1.70	0
FBgn0029753	FBtr0340475	0.6390	0	0	0	0.3714	-5.40	1.5310	175	0.00	0
FBgn0029755	FBtr0070751	0.4573	0	0	0	0.3684	-4.10	-0.6244	95	-8.80	0
FBgn0029756	FBtr0070798	0.5904	1	1	1	0.3718	-1.00	1.8253	78	-1.30	0
FBgn0029763	FBtr0340462	1.3646	1	1	1	0.4677	-8.10	-0.5065	201	-7.30	0
FBgn0029766	FBtr0070777	13.1617	0	0	0	0.4000	-3.90	3.6241	115	-4.40	0
FBgn0029778	FBtr0070785	0.4364	0	0	0	0.4729	-8.90	-1.6798	129	-10.90	0
FBgn0029783	FBtr0070852	0.2938	0	0	0	0.3611	0.00	2.3474	72	-4.40	0
FBgn0029785	FBtr0070800	0.3042	0	0	0	0.4250	NA	3.9235	40	NA	0
FBgn0029789	FBtr0070847	0.4998	1	1	1	0.3611	-0.50	0.1020	72	-2.70	0
FBgn0029798	FBtr0332398	0.5458	1	1	1	0.3607	0.00	1.1258	122	-3.40	0
FBgn0029800	FBtr0070840	0.5677	0	0	0	0.3649	-2.30	0.4371	74	-7.70	0
FBgn0029801	FBtr0070809	0.5839	0	0	0	0.5309	-0.60	-2.7297	307	-7.30	0
FBgn0029813	FBtr0070832	1.2244	0	0	0	0.3889	-3.90	2.8540	54	-6.40	0
FBgn0029818	FBtr0070830	0.3209	0	0	0	0.4752	-5.30	4.2481	101	-6.10	0
FBgn0029819	FBtr0343537	0.4413	0	0	0	0.4688	-2.10	0.4738	160	-0.20	0
FBgn0029820	FBtr0345313	4.4911	0	0	0	0.5000	-3.90	0.8988	234	-5.30	0
FBgn0029821	FBtr0333800	0.4211	0	0	0	0.5261	-3.10	2.6739	211	-6.10	0
FBgn0029822	FBtr0070826	0.1611	0	0	0	0.5098	-11.00	1.9456	357	-3.60	0
FBgn0029823	FBtr0345317	1.5388	0	0	0	0.4828	-3.20	1.2460	58	-5.50	0
FBgn0029824	FBtr0343051	1.6643	8	8	8	0.3924	-6.80	2.0440	632	-5.30	0
FBgn0029825	FBtr0343052	0.0200	0	0	0	0.3766	0.00	3.2994	77	-7.10	0
FBgn0029830	FBtr0343414	0.0000	0	0	0	0.3689	-8.40	2.4108	103	-2.00	0
FBgn0029831	FBtr0070866	0.5191	0	0	0	0.4588	-4.40	0.1260	449	-7.70	0
FBgn0029833	FBtr0305344	2.5563	0	0	0	0.4416	-3.00	3.3437	77	-6.40	0
FBgn0029840	FBtr0345895	0.3004	2	2	2	0.4889	-1.20	1.4021	495	-0.10	1
FBgn0029849	FBtr0070874	2.0873	4	4	4	0.4557	-7.10	0.5307	463	-7.90	0
FBgn0029853	FBtr0070895	0.3749	0	0	0	0.5100	-2.80	2.8540	100	-4.70	0
FBgn0029854	FBtr0089870	1.6610	0	0	0	0.4824	-5.90	2.4243	85	-2.80	0
FBgn0029856	FBtr0333520	2.8095	0	0	0	0.4279	-5.70	-2.5826	215	-4.40	0
FBgn0029857	FBtr0070897	0.8558	0	0	0	0.4815	-5.50	1.2608	54	-7.20	0
FBgn0029858	FBtr0070898	0.5279	0	0	0	0.3750	-1.20	-1.9760	104	-12.90	0
FBgn0029860	FBtr0100319	2.5361	0	0	0	0.4194	-1.70	0.0329	62	-15.00	0
FBgn0029861	FBtr0070899	0.4832	1	1	1	0.5983	-3.40	2.5093	117	-10.10	0
FBgn0029866	FBtr0070904	0.9387	2	2	2	0.4591	-3.60	-1.2981	281	-3.20	0
FBgn0029867	FBtr0070905	0.3958	0	0	0	0.4502	-4.90	0.2558	402	-3.80	0
FBgn0029868	FBtr0070924	2.4495	1	1	1	0.4250	-4.40	2.6480	120	-5.90	0
FBgn0029870	FBtr0070910	0.6077	4	4	4	0.3780	-1.80	2.4990	508	-6.10	0
FBgn0029873	FBtr0070912	0.1202	1	1	1	0.5442	-13.20	1.9172	226	-13.20	0
FBgn0029874	FBtr0070918	0.4038	2	2	2	0.3412	-4.90	-0.2515	85	-4.70	0
FBgn0029878	FBtr0070945	0.8664	1	1	1	0.4538	0.00	1.7567	368	-7.70	0
FBgn0029879	FBtr0070946	1.7264	0	0	0	0.5000	NA	-3.7360	6	NA	NA
FBgn0029881	FBtr0343375	1.7837	5	5	4	0.3824	-1.90	3.3004	782	-7.90	0
FBgn0029882	FBtr0070993	2.0401	0	0	0	0.4091	-1.20	4.0480	88	-6.10	0
FBgn0029885	FBtr0070992	1.2763	1	1	1	0.3826	-1.20	3.1352	230	-3.60	0
FBgn0029887	FBtr0070991	0.2337	0	0	0	0.4723	-8.70	2.1267	235	-7.60	0
FBgn0029888	FBtr0343330	3.2691	0	0	0	0.4545	-2.70	-0.3883	77	-5.20	0
FBgn0029890	FBtr0070955	0.1330	0	0	0	0.3188	-0.50	1.8794	69	-4.50	0
FBgn0029891	FBtr0100416	0.4917	2	2	2	0.4345	-8.90	1.4500	603	0.00	0
FBgn0029892	FBtr0070989	0.4112	0	0	0	0.3235	NA	3.0203	34	NA	NA
FBgn0029893	FBtr0070988	0.0401	13	13	9	0.4411	-8.20	1.4482	1045	-3.50	0
FBgn0029894	FBtr0070987	0.1498	1	1	1	0.4725	-7.50	-2.1811	218	-2.10	0
FBgn0029895	FBtr0070959	0.7261	4	4	4	0.4465	0.00	0.4115	1187	-5.20	0
FBgn0029897	FBtr0070983	0.2407	0	0	0	0.2500	NA	3.5264	36	NA	NA
FBgn0029899	FBtr0070961	0.1997	0	0	0	0.4501	-5.90	3.9016	411	-1.60	0
FBgn0029903	FBtr0070964	0.5524	0	0	0	0.5016	-1.90	1.8760	315	-4.80	0
FBgn0029905	FBtr0070974	0.1356	2	2	2	0.5596	-7.60	-1.4361	193	-4.80	0
FBgn0029906	FBtr0070970	0.2798	1	1	1	0.4545	-0.60	1.7167	77	-6.00	0
FBgn0029911	FBtr0343323	0.9064	3	3	2	0.5154	-1.20	-2.6367	875	-2.30	0
FBgn0029912	FBtr0070994	0.2844	1	1	1	0.5188	-7.50	0.9647	266	-13.30	0
FBgn0029913	FBtr0071041	0.8248	1	1	1	0.2609	-9.40	1.6646	46	-4.70	0
FBgn0029914	FBtr0300177	0.2001	3	3	3	0.3687	-10.50	1.2939	217	-0.40	0
FBgn0029915	FBtr0071040	3.1797	0	0	0	0.3448	NA	3.3457	29	NA	NA
FBgn0029924	FBtr0071003	0.4922	0	0	0	0.4600	-6.50	-0.2705	100	-8.10	0
FBgn0029925	FBtr0071038	1.2711	0	0	0	0.4312	-3.30	1.9187	218	-7.30	0
FBgn0029928	FBtr0071032	0.6761	0	0	0	0.3544	-3.80	2.8945	79	-5.10	0
FBgn0029929	FBtr0343331	1.1168	0	0	0	0.4667	-4.20	1.6147	90	-6.70	0
FBgn0029935	FBtr0071020	0.1639	1	1	1	0.6085	-7.00	1.8157	235	-6.80	0
FBgn0029936	FBtr0331308	1.3098	0	0	0	0.4021	-2.70	2.8000	97	-5.80	0
FBgn0029937	FBtr0071015	1.1562	2	2	2	0.5498	-4.00	0.7178	271	-6.00	0
FBgn0029939	FBtr0339815	0.0104	4	4	2	0.4619	-7.80	-2.1192	578	-11.10	0
FBgn0029941	FBtr0089712	0.3680	0	0	0	0.5123	-9.40	-1.1904	326	-5.00	0
FBgn0029942	FBtr0303414	0.3582	0	0	0	0.5479	-14.00	-0.5188	146	-5.70	0
FBgn0029943	FBtr0071065	1.8894	0	0	0	0.3265	-0.70	2.1764	98	-5.60	0
FBgn0029944	FBtr0071049	0.2405	6	6	5	0.4693	-8.72	1.7997	375	-6.00	0
FBgn0029957	FBtr0071071	0.1363	2	2	2	0.4931	-7.90	3.0384	436	-6.30	0
FBgn0029958	FBtr0071076	0.0763	1	1	1	0.4804	-6.00	-1.0865	306	-2.50	0
FBgn0029959	FBtr0307272	1.6093	0	0	0	0.3803	-3.50	0.8260	305	-0.80	0
FBgn0029969	FBtr0345982	1.7882	0	0	0	0.4000	-2.90	2.5111	115	-9.50	0
FBgn0029970	FBtr0071142	1.3168	1	1	1	0.4150	-0.40	3.5878	147	-8.60	0
FBgn0029971	FBtr0071140	1.7168	2	2	2	0.5021	-6.10	2.5826	239	-6.50	0
FBgn0029975	FBtr0071091	0.2590	0	0	0	0.4331	-2.30	2.0652	441	-3.50	0
FBgn0029976	FBtr0340148	0.0527	4	4	4	0.4697	-13.30	-3.3741	775	-9.00	1
FBgn0029979	FBtr0344137	0.4517	2	2	2	0.4291	-2.30	1.2084	522	-1.20	0
FBgn0029980	FBtr0071131	0.5291	0	0	0	0.3165	0.00	1.0017	139	-3.80	0
FBgn0029990	FBtr0071123	19.3136	0	0	0	0.5000	NA	0.2503	32	NA	NA
FBgn0029992	FBtr0071117	1.3674	2	2	2	0.4469	-8.40	0.6417	311	-3.20	0
[truncated: 4,739 more rows]

## Sheet: 0-2h embryos
Gene	Major_isoform	TE_CDS	Num_uORF(TE_uORF>0)	Num_uORF(TE_uORF>=0.1)	Num_uORF(TE_uORF>=0.5)	UTR5_GC_content	MFE_cAUG	cAUG_Kozak_score	UTR5_length	MFE_CAP	Num_stable_hairpin
FBgn0000008	FBtr0100521	0.5938	1	1	1	0.3913	-2.30	-2.5050	368	-6.60	0
FBgn0000014	FBtr0306337	0.7265	3	3	2	0.5003	-8.00	2.5773	1803	-3.90	1
FBgn0000015	FBtr0083384	0.4143	1	0	0	0.4649	-5.30	-1.0010	1211	-7.20	1
FBgn0000017	FBtr0330135	2.3950	5	5	5	0.4547	-4.00	-0.9316	739	-8.00	0
FBgn0000018	FBtr0080168	0.2378	0	0	0	0.4691	-9.80	2.2201	81	-6.10	0
FBgn0000022	FBtr0070072	2.7331	0	0	0	0.4286	-3.30	2.4983	63	-4.10	0
FBgn0000032	FBtr0085609	0.4273	1	1	0	0.4225	-12.00	2.9887	187	-3.70	0
FBgn0000038	FBtr0073299	0.2465	1	1	1	0.3917	-3.20	1.6900	240	-1.40	0
FBgn0000042	FBtr0070822	2.2250	0	0	0	0.3727	-0.10	3.6509	161	-5.10	0
FBgn0000043	FBtr0086029	2.3864	0	0	0	0.3630	0.00	3.6509	135	-3.70	0
FBgn0000044	FBtr0071519	0.4831	0	0	0	0.3750	-2.70	4.0480	96	-3.30	0
FBgn0000046	FBtr0082785	0.5977	0	0	0	0.4321	-3.40	2.5267	81	-5.60	0
FBgn0000052	FBtr0079219	0.6459	0	0	0	0.4819	-3.30	1.7730	83	-3.50	0
FBgn0000053	FBtr0100353	0.8564	0	0	0	0.4611	-9.20	-0.7943	193	-7.10	0
FBgn0000054	FBtr0086113	1.1318	0	0	0	0.4382	0.00	-1.1867	178	-6.20	0
FBgn0000055	FBtr0100589	0.3494	1	0	0	0.4062	-1.40	2.0900	128	-5.00	0
FBgn0000057	FBtr0340288	0.2517	3	1	0	0.4643	-2.90	0.4081	140	-9.00	0
FBgn0000061	FBtr0078053	0.1111	0	0	0	0.4927	-5.40	-1.2967	410	-10.30	0
FBgn0000063	FBtr0083478	0.7356	0	0	0	0.3300	-3.10	2.4087	100	-0.60	0
FBgn0000064	FBtr0084995	2.1932	0	0	0	0.4000	-6.20	3.5279	55	-6.70	0
FBgn0000071	FBtr0081619	0.5023	0	0	0	0.4333	-3.00	1.4215	120	-5.30	0
FBgn0000075	FBtr0081154	0.4359	0	0	0	0.4125	-3.40	-1.0740	160	-7.10	0
FBgn0000077	FBtr0307281	0.8145	0	0	0	0.3906	-3.00	4.3002	64	-2.90	0
FBgn0000083	FBtr0089518	2.6837	0	0	0	0.3623	0.00	4.3264	69	-2.70	0
FBgn0000084	FBtr0070025	0.5523	0	0	0	0.4701	-4.70	2.0633	134	-8.40	0
FBgn0000097	FBtr0077850	1.3398	4	4	4	0.4645	-6.10	-3.0429	999	-12.40	1
FBgn0000100	FBtr0078481	0.0312	0	0	0	0.4118	-0.10	3.2504	85	-4.00	0
FBgn0000108	FBtr0307294	1.0287	0	0	0	0.5049	-3.00	1.6895	206	-10.00	0
FBgn0000109	FBtr0346440	2.1951	1	1	1	0.3738	0.00	3.5941	107	-7.30	0
FBgn0000114	FBtr0300567	0.1432	0	0	0	0.3994	-3.30	1.3750	333	-8.40	0
FBgn0000115	FBtr0075517	2.1895	0	0	0	0.3803	-4.10	1.3583	142	-0.50	0
FBgn0000116	FBtr0076544	0.8533	0	0	0	0.5072	-4.90	2.1016	483	-5.10	0
FBgn0000117	FBtr0089991	1.1181	0	0	0	0.4088	-11.10	3.1367	159	-2.30	0
FBgn0000119	FBtr0087702	1.5131	2	2	2	0.4607	-2.70	2.0370	191	-6.60	0
FBgn0000137	FBtr0070075	0.4974	0	0	0	0.4641	0.00	0.1051	209	-5.00	0
FBgn0000139	FBtr0084660	0.7524	1	1	1	0.4712	-2.30	0.9217	104	-7.70	0
FBgn0000140	FBtr0084692	0.6722	1	1	1	0.4062	-0.10	-0.1598	192	-6.80	0
FBgn0000146	FBtr0080165	3.7179	0	0	0	0.4054	-3.60	-0.2087	111	-5.80	0
FBgn0000147	FBtr0082483	3.1354	1	1	0	0.4583	-1.00	-0.2291	168	-0.80	0
FBgn0000150	FBtr0346611	1.0953	0	0	0	0.4333	NA	1.9042	30	NA	NA
FBgn0000152	FBtr0074372	1.2208	6	6	6	0.4044	-7.20	1.1882	455	-2.10	0
FBgn0000157	FBtr0072378	0.6433	0	0	0	0.4894	-21.70	-1.3224	615	-7.60	0
FBgn0000158	FBtr0084869	0.2622	0	0	0	0.3210	-4.20	1.1258	81	-2.00	0
FBgn0000163	FBtr0074388	1.1715	17	17	16	0.4034	-4.80	2.5009	1066	-8.80	0
FBgn0000166	FBtr0081665	0.6532	1	1	1	0.4769	-6.60	2.4972	195	-4.50	0
FBgn0000173	FBtr0300566	3.4531	0	0	0	0.4449	-4.20	1.1882	245	-1.60	0
FBgn0000179	FBtr0300609	0.1275	0	0	0	0.3941	-5.70	-1.9064	642	-9.80	0
FBgn0000180	FBtr0079929	0.7634	1	1	1	0.4656	-3.20	2.1517	305	-9.80	0
FBgn0000181	FBtr0087783	0.6091	1	1	1	0.4351	-4.70	-1.0570	154	-2.10	0
FBgn0000182	FBtr0080804	1.6904	2	2	2	0.4536	-4.60	2.7507	560	-8.90	0
FBgn0000183	FBtr0081002	3.2824	3	3	3	0.4646	-1.60	1.5572	891	-3.00	0
FBgn0000212	FBtr0075525	1.9621	0	0	0	0.4252	-2.20	1.9617	127	-4.50	0
FBgn0000216	FBtr0075621	0.9913	0	0	0	0.4167	-0.30	3.8729	72	-2.50	0
FBgn0000221	FBtr0070638	0.5133	0	0	0	0.3472	-4.30	0.3101	144	-2.10	0
FBgn0000227	FBtr0077423	1.7265	0	0	0	0.3977	-4.10	3.0453	88	-4.90	0
FBgn0000228	FBtr0302567	0.6194	0	0	0	0.1875	NA	4.6558	16	NA	NA
FBgn0000229	FBtr0080087	1.1600	5	5	4	0.3111	-1.50	2.2730	270	-5.20	0
FBgn0000233	FBtr0071379	0.9607	1	1	1	0.4221	-3.50	3.2270	488	-7.60	0
FBgn0000239	FBtr0301342	1.0156	0	0	0	0.5027	-8.30	2.5228	372	-6.00	0
FBgn0000244	FBtr0082119	0.6972	0	0	0	0.3704	NA	1.9659	27	NA	NA
FBgn0000246	FBtr0083196	0.8043	1	1	1	0.4177	-5.90	3.5878	79	-8.10	0
FBgn0000247	FBtr0346613	0.4571	0	0	0	0.4639	-5.60	0.7776	97	-5.30	0
FBgn0000250	FBtr0080845	2.8336	1	1	1	0.4151	-1.80	2.2503	159	-6.70	0
FBgn0000251	FBtr0081413	1.4198	1	1	1	0.4065	-3.20	3.9037	214	-4.50	0
FBgn0000253	FBtr0088001	5.7066	0	0	0	0.4058	0.00	4.2544	207	-3.60	0
FBgn0000256	FBtr0077513	0.0409	4	3	1	0.4951	-13.80	-2.1048	511	-5.10	0
FBgn0000257	FBtr0074728	0.2825	0	0	0	0.5849	-4.30	-0.4357	159	-6.60	0
FBgn0000259	FBtr0308085	0.6663	0	0	0	0.4604	-5.10	3.8950	139	-12.50	0
FBgn0000261	FBtr0075058	2.4201	0	0	0	0.4121	-2.10	4.2987	182	-5.60	0
FBgn0000273	FBtr0335495	0.6679	4	4	3	0.4759	-6.30	3.0691	1263	-4.00	1
FBgn0000283	FBtr0083126	1.7843	3	3	3	0.4906	-6.20	2.3587	212	-6.90	0
FBgn0000286	FBtr0089647	0.1473	0	0	0	0.4140	-7.00	1.1854	343	-7.30	0
FBgn0000289	FBtr0339962	1.4144	3	3	2	0.4443	-1.00	1.4373	754	-2.30	0
FBgn0000299	FBtr0079001	0.4434	0	0	0	0.5000	-6.30	0.8185	102	-10.30	0
FBgn0000307	FBtr0080839	1.2407	7	7	6	0.4216	-4.20	-2.4828	721	-7.10	0
FBgn0000308	FBtr0079233	3.4973	0	0	0	0.4760	0.00	2.3430	250	-6.70	0
FBgn0000316	FBtr0070065	2.1402	0	0	0	0.3250	-6.50	1.3890	120	-2.50	0
FBgn0000317	FBtr0343686	1.6301	3	3	3	0.4755	-4.90	2.5073	286	-6.80	0
FBgn0000318	FBtr0079095	1.3183	0	0	0	0.4894	-4.90	0.6453	141	-6.90	0
FBgn0000319	FBtr0074180	2.0464	1	1	1	0.3697	-8.10	2.4061	330	0.00	0
FBgn0000320	FBtr0079335	0.4261	0	0	0	0.4455	-8.70	1.7997	211	-15.60	0
FBgn0000326	FBtr0071687	0.7301	0	0	0	0.4112	-9.70	2.3754	107	-6.50	0
FBgn0000330	FBtr0071033	1.0725	0	0	0	0.3148	-2.70	-0.9364	54	-3.10	0
FBgn0000337	FBtr0344723	0.3261	0	0	0	0.5526	NA	-1.0390	38	NA	NA
FBgn0000339	FBtr0080848	2.5129	0	0	0	0.4638	-5.60	3.0454	69	-0.30	0
FBgn0000346	FBtr0073754	1.1292	1	1	1	0.2933	0.00	2.8522	225	-3.90	0
FBgn0000351	FBtr0333350	0.1064	0	0	0	0.2353	NA	-2.2587	17	NA	NA
FBgn0000352	FBtr0336916	1.2449	2	2	2	0.4632	-6.30	3.0033	136	-6.50	0
FBgn0000370	FBtr0081512	0.2035	4	4	4	0.3841	-1.10	-0.8348	289	-2.90	0
FBgn0000376	FBtr0070495	0.5955	2	1	0	0.4511	-8.70	3.5458	133	-6.20	0
FBgn0000377	FBtr0070418	1.4176	0	0	0	0.4167	-5.30	1.0974	120	-1.80	0
FBgn0000382	FBtr0070378	0.7266	0	0	0	0.2982	-1.50	2.6280	171	-4.80	0
FBgn0000384	FBtr0111126	0.9970	8	8	8	0.3770	-8.30	-0.5216	382	-1.40	0
FBgn0000392	FBtr0290322	1.4817	4	4	4	0.3626	-6.80	-2.7534	182	-2.90	0
FBgn0000394	FBtr0340464	0.2156	1	1	0	0.4384	-3.00	-0.0831	333	-4.60	0
FBgn0000395	FBtr0071610	0.3193	6	6	2	0.4445	-2.20	2.2964	1082	-11.30	0
FBgn0000404	FBtr0076075	5.4288	6	6	6	0.4392	-2.10	1.9203	510	-4.90	0
FBgn0000405	FBtr0071911	5.8060	0	0	0	0.4045	-1.70	4.6558	267	-4.10	0
FBgn0000406	FBtr0331931	0.2832	0	0	0	0.4944	-6.20	1.9772	89	-9.90	0
FBgn0000409	FBtr0080889	3.3265	0	0	0	0.4070	-1.90	2.3942	86	-5.10	0
FBgn0000411	FBtr0333034	1.1931	0	0	0	0.3668	-1.50	-0.5900	199	-1.00	0
FBgn0000412	FBtr0081988	2.3125	0	0	0	0.4261	-0.60	2.5449	230	-3.90	0
FBgn0000414	FBtr0305086	1.0707	8	8	8	0.4529	-7.60	2.4691	552	-4.90	0
FBgn0000416	FBtr0085713	2.9361	0	0	0	0.3643	-2.50	2.4972	129	-2.70	0
FBgn0000426	FBtr0088010	1.3639	0	0	0	0.3884	0.00	1.9938	121	-11.80	0
FBgn0000439	FBtr0081621	0.6683	1	1	0	0.3722	-3.00	-0.0161	489	-6.40	0
FBgn0000447	FBtr0081890	0.8056	0	0	0	0.6667	NA	0.3550	15	NA	NA
FBgn0000448	FBtr0306346	0.1267	3	3	1	0.5120	-3.50	-1.2784	502	-4.80	1
FBgn0000449	FBtr0073205	1.0259	0	0	0	0.4375	-2.50	2.6135	48	-2.80	0
FBgn0000451	FBtr0301385	0.6279	0	0	0	0.4947	0.00	3.1927	190	-11.10	0
FBgn0000454	FBtr0345229	1.4548	0	0	0	0.5556	-4.90	1.3630	63	-8.40	0
FBgn0000455	FBtr0082597	1.0702	0	0	0	0.4244	-2.70	2.9796	172	-3.30	0
FBgn0000459	FBtr0100384	0.5182	2	2	0	0.4324	-3.80	2.1435	562	-7.80	0
FBgn0000463	FBtr0304658	3.3184	6	6	6	0.4124	0.00	2.6189	679	-5.30	0
FBgn0000464	FBtr0081260	3.1279	0	0	0	0.3675	-4.20	2.0108	117	0.00	0
FBgn0000477	FBtr0083538	0.5914	0	0	0	0.4474	NA	0.6129	38	NA	NA
FBgn0000479	FBtr0070517	0.4987	0	0	0	0.5938	-11.40	-2.7313	581	-7.80	1
FBgn0000482	FBtr0070269	1.2577	0	0	0	0.4648	-1.20	2.2446	71	-10.00	0
FBgn0000489	FBtr0075529	0.4109	0	0	0	0.4156	-5.00	0.2304	972	-5.40	0
FBgn0000490	FBtr0077775	0.2890	1	1	1	0.5860	-11.90	0.2425	186	-5.50	0
FBgn0000492	FBtr0085441	0.4747	0	0	0	0.4440	-4.40	-4.0648	250	-7.20	0
FBgn0000497	FBtr0078045	0.6214	1	1	1	0.4395	-7.40	1.9278	810	-5.60	0
FBgn0000499	FBtr0073454	2.0502	2	2	1	0.4799	-7.40	2.8427	473	-6.30	0
FBgn0000520	FBtr0070487	0.4211	0	0	0	0.4328	-8.00	1.3543	134	-1.70	0
FBgn0000524	FBtr0070914	0.0840	7	6	5	0.4638	-3.10	1.1761	414	-1.60	0
FBgn0000533	FBtr0083083	1.8557	0	0	0	0.4902	-8.60	2.2503	204	-7.60	0
FBgn0000536	FBtr0074212	1.0321	0	0	0	0.4427	-1.50	1.1173	192	-8.50	0
FBgn0000541	FBtr0332104	2.0839	3	3	3	0.4478	-2.70	3.1130	134	-4.60	0
FBgn0000542	FBtr0112802	0.6110	1	1	1	0.4150	-10.60	2.8058	347	-3.00	0
FBgn0000543	FBtr0072903	0.3620	0	0	0	0.4756	-0.10	-0.0684	82	-4.80	0
FBgn0000546	FBtr0086009	1.1196	8	8	8	0.4060	-8.10	-0.7347	468	-8.60	0
FBgn0000547	FBtr0334265	3.5588	1	1	1	0.3866	-0.80	3.5245	432	-8.10	0
FBgn0000551	FBtr0344634	0.3806	0	0	0	0.4211	-0.50	1.5572	76	-1.60	0
FBgn0000556	FBtr0345022	0.2325	0	0	0	0.3939	NA	3.5302	33	NA	NA
FBgn0000557	FBtr0085833	0.3932	0	0	0	0.4821	-3.00	0.6552	168	-6.40	0
FBgn0000559	FBtr0332966	0.2972	0	0	0	0.4667	-5.20	4.2326	75	-8.10	0
FBgn0000562	FBtr0114586	1.6712	4	4	4	0.4596	-2.00	1.1998	742	-7.70	0
FBgn0000565	FBtr0330176	0.1297	0	0	0	0.3151	-2.20	1.5390	146	-6.20	0
FBgn0000566	FBtr0345422	1.5708	0	0	0	0.5195	-0.90	2.7315	77	-4.50	0
FBgn0000568	FBtr0075150	0.1457	1	1	1	0.4774	-0.50	1.9174	530	-5.60	0
FBgn0000575	FBtr0072578	0.7587	0	0	0	0.4356	-2.90	1.8490	264	-6.20	0
FBgn0000576	FBtr0082863	0.5691	2	2	2	0.4141	-0.50	-3.8544	326	-3.00	0
FBgn0000577	FBtr0088096	0.3912	0	0	0	0.4413	-5.50	-0.1065	213	-6.60	0
FBgn0000578	FBtr0340450	1.4998	2	2	1	0.4864	-5.00	0.6185	405	-7.80	0
FBgn0000579	FBtr0077909	1.2511	0	0	0	0.4353	-6.40	1.7345	85	-5.10	0
FBgn0000581	FBtr0088140	0.2350	9	9	9	0.5058	0.00	2.5773	1036	-6.60	1
FBgn0000588	FBtr0080325	0.2089	0	0	0	0.4176	-7.70	2.5508	170	-8.50	0
FBgn0000591	FBtr0084961	0.4387	0	0	0	0.3571	0.00	4.2544	84	-5.20	0
FBgn0000606	FBtr0088390	0.6860	0	0	0	0.4583	-0.20	1.8407	96	-6.50	0
FBgn0000611	FBtr0074135	5.9013	1	1	1	0.3203	-6.00	2.2909	231	-3.40	0
FBgn0000615	FBtr0086243	0.0727	0	0	0	0.3404	-3.30	3.1860	141	-6.20	0
FBgn0000617	FBtr0074463	1.7766	0	0	0	0.3571	-0.70	-0.4001	98	-3.00	0
FBgn0000618	FBtr0073540	3.3263	1	1	1	0.3944	-3.90	0.7073	142	0.00	0
FBgn0000629	FBtr0273338	0.9012	0	0	0	0.3898	-0.50	-0.1906	118	-9.10	0
FBgn0000633	FBtr0339940	0.1763	1	1	1	0.4682	-5.20	-0.3995	754	-10.90	0
FBgn0000635	FBtr0070667	1.5464	2	2	0	0.4048	-1.00	4.2806	420	-10.40	0
FBgn0000636	FBtr0112804	0.3676	2	2	0	0.4505	-0.90	1.1321	586	-2.40	0
FBgn0000639	FBtr0339515	0.0038	0	0	0	0.3830	-4.40	3.1629	94	-2.90	0
FBgn0000658	FBtr0086754	0.2016	5	4	2	0.4885	-7.70	3.3592	1349	-7.00	0
FBgn0000659	FBtr0085321	0.6388	2	2	2	0.4311	-7.70	0.7244	559	-1.80	0
FBgn0000662	FBtr0087647	1.2722	2	2	2	0.4541	-0.30	1.3109	425	-5.10	0
FBgn0000667	FBtr0070344	0.7545	3	3	3	0.4925	-2.20	2.3609	398	-2.90	0
FBgn0000709	FBtr0077192	0.1046	1	0	0	0.3725	-3.30	3.9449	153	-13.50	0
FBgn0000711	FBtr0071447	2.9296	0	0	0	0.4004	-5.90	3.5264	552	-3.10	0
FBgn0000719	FBtr0100538	1.5730	9	9	6	0.3632	-7.20	1.0830	859	-5.40	0
FBgn0000721	FBtr0089308	1.2933	11	11	8	0.4270	-4.80	0.7124	829	-7.90	0
FBgn0000723	FBtr0082051	0.2665	2	2	2	0.4795	-7.30	1.7580	342	-10.30	0
FBgn0000808	FBtr0332308	0.1673	0	0	0	0.4487	-5.90	-0.2669	78	-8.40	0
FBgn0000810	FBtr0070396	3.2350	0	0	0	0.4561	-6.00	0.1697	171	-4.80	0
FBgn0000826	FBtr0070234	0.2640	0	0	0	0.5441	-12.60	1.3617	68	-5.40	0
FBgn0000927	FBtr0070485	0.0358	2	0	0	0.4138	-7.90	-3.5935	58	-4.30	0
FBgn0000996	FBtr0339999	2.8490	0	0	0	0.3907	0.00	-0.3656	215	-4.80	0
FBgn0001075	FBtr0077478	0.5525	11	11	8	0.4309	-2.20	-0.6731	680	-15.50	0
FBgn0001077	FBtr0081625	1.0018	0	0	0	0.4571	-5.60	0.9140	70	-7.70	0
FBgn0001078	FBtr0075086	0.8135	15	15	8	0.4231	0.00	2.4485	1326	-3.00	0
FBgn0001079	FBtr0074602	1.7906	0	0	0	0.5059	-3.60	2.3249	85	-5.50	0
FBgn0001083	FBtr0342733	0.2105	0	0	0	0.4408	-4.40	2.7425	211	-4.30	0
FBgn0001084	FBtr0331992	0.9178	0	0	0	0.4655	-8.90	-1.1812	58	-3.40	0
FBgn0001085	FBtr0075743	1.9591	10	10	9	0.3652	-1.80	3.6746	712	-8.20	0
FBgn0001086	FBtr0080833	3.2357	1	1	1	0.3310	-2.90	3.1240	145	-3.70	0
FBgn0001087	FBtr0073842	2.2880	1	1	0	0.4160	-3.60	3.1706	238	-1.40	0
FBgn0001089	FBtr0079230	0.1787	0	0	0	0.5217	-6.50	1.9893	138	-8.30	0
FBgn0001090	FBtr0074657	0.6179	0	0	0	0.4046	-1.40	1.8471	173	-6.20	0
FBgn0001091	FBtr0100479	1.0073	0	0	0	0.4455	-2.40	0.2946	110	-5.60	0
FBgn0001092	FBtr0332618	0.2927	0	0	0	0.3922	-1.30	1.6993	51	-3.70	0
FBgn0001098	FBtr0089497	1.7446	0	0	0	0.5000	-4.30	0.9843	90	-11.50	0
FBgn0001099	FBtr0346516	6.1156	0	0	0	0.3986	-0.10	1.7054	138	-11.90	0
FBgn0001104	FBtr0076934	2.3658	2	1	1	0.4581	-3.30	1.6491	406	-1.80	0
FBgn0001105	FBtr0074107	2.3222	6	6	6	0.3998	-3.60	2.3609	848	-7.70	0
FBgn0001108	FBtr0075756	0.2750	1	1	0	0.4637	-4.40	1.1987	289	-6.20	0
FBgn0001114	FBtr0307091	0.9779	0	0	0	0.4800	-4.80	3.2670	50	-5.30	0
FBgn0001120	FBtr0075697	0.3392	0	0	0	0.2970	0.00	-1.2586	101	-6.40	0
FBgn0001122	FBtr0088264	6.3557	0	0	0	0.4176	0.00	3.7057	261	-4.90	0
FBgn0001123	FBtr0072142	0.9316	0	0	0	0.5318	-7.70	-0.6233	299	-6.50	0
FBgn0001124	FBtr0087232	1.7181	0	0	0	0.4330	-5.90	1.5871	97	-5.70	0
FBgn0001125	FBtr0077867	0.6722	0	0	0	0.3868	-4.50	1.0230	106	-6.30	0
FBgn0001128	FBtr0079146	0.5620	0	0	0	0.4483	-4.60	1.5387	145	-5.40	0
FBgn0001133	FBtr0071548	1.1286	3	3	3	0.3026	-0.50	2.5231	76	-6.80	0
FBgn0001137	FBtr0079708	0.3389	4	4	2	0.4545	-7.20	-1.8133	374	-2.80	0
FBgn0001138	FBtr0081808	0.4207	2	2	2	0.3905	-1.50	2.5252	420	-5.60	0
FBgn0001139	FBtr0084962	1.2768	4	4	3	0.4874	-5.00	3.3457	515	-4.80	0
FBgn0001142	FBtr0300568	0.7238	0	0	0	0.4677	-3.90	3.4661	186	-6.40	0
FBgn0001145	FBtr0073495	0.4231	0	0	0	0.4865	-2.50	0.1037	148	-3.80	0
FBgn0001147	FBtr0072461	0.2065	0	0	0	0.4737	-6.60	0.5004	323	-10.30	0
FBgn0001148	FBtr0072444	0.7055	0	0	0	0.4185	-2.70	1.8074	184	-6.60	0
FBgn0001149	FBtr0082607	0.6897	0	0	0	0.3429	-1.50	3.2504	70	-5.40	0
FBgn0001150	FBtr0070460	1.6179	0	0	0	0.4435	-1.90	2.0203	115	-8.10	0
FBgn0001168	FBtr0100153	0.4971	0	0	0	0.4440	0.00	3.2511	491	-4.00	0
FBgn0001169	FBtr0083915	1.1616	1	1	1	0.4730	-3.50	3.0010	241	-10.70	0
FBgn0001174	FBtr0114554	2.3153	0	0	0	0.4713	-1.40	0.9742	87	-5.80	0
FBgn0001179	FBtr0114599	0.8351	0	0	0	0.2727	-1.30	-0.3952	66	-3.30	0
FBgn0001180	FBtr0081950	1.1964	1	1	0	0.4854	-6.30	2.1253	515	-5.40	0
FBgn0001185	FBtr0080883	0.6338	2	2	2	0.3485	-5.20	-0.4085	198	-1.40	0
FBgn0001186	FBtr0071361	0.3721	1	1	0	0.4073	-0.50	2.4422	329	-7.80	0
FBgn0001189	FBtr0070270	2.1141	5	5	2	0.5286	-8.40	0.8770	350	-14.30	0
FBgn0001197	FBtr0085062	3.7003	0	0	0	0.4878	-1.80	2.8759	164	-1.90	0
FBgn0001202	FBtr0081180	1.0255	0	0	0	0.3729	-2.10	2.6414	118	-5.70	0
FBgn0001206	FBtr0071511	2.2330	1	1	1	0.4677	-10.50	0.7080	263	-10.30	0
FBgn0001208	FBtr0334645	0.2856	0	0	0	0.4211	-1.90	2.2964	76	-7.10	0
FBgn0001215	FBtr0085299	2.8866	0	0	0	0.3644	-1.90	2.8802	118	-8.50	0
FBgn0001218	FBtr0073609	1.8136	0	0	0	0.3893	-7.90	1.9893	131	-8.10	0
FBgn0001220	FBtr0339969	0.4517	0	0	0	0.4493	-2.60	3.2888	138	-2.90	0
FBgn0001222	FBtr0086782	1.2873	0	0	0	0.3745	-8.10	-4.1281	243	-5.10	0
FBgn0001223	FBtr0100559	2.1601	0	0	0	0.3031	-3.10	1.3409	254	-1.00	0
FBgn0001224	FBtr0309504	2.2805	0	0	0	0.3362	-2.20	4.2544	116	-7.00	0
FBgn0001225	FBtr0076496	1.5585	0	0	0	0.3262	-1.00	3.3411	187	-5.00	0
FBgn0001226	FBtr0076454	0.7311	0	0	0	0.3089	-0.90	3.2994	123	-2.10	0
FBgn0001228	FBtr0100653	0.5267	0	0	0	0.5455	-5.70	2.3003	44	-5.70	0
FBgn0001229	FBtr0076497	0.3733	0	0	0	0.4611	-0.10	1.9340	180	-6.80	0
FBgn0001230	FBtr0084589	0.8396	0	0	0	0.3398	-0.60	2.1253	206	-5.40	0
FBgn0001233	FBtr0073040	1.4834	0	0	0	0.3289	-2.70	2.0860	152	-3.50	0
FBgn0001235	FBtr0344145	0.4825	12	11	7	0.3759	-4.70	-1.6111	1277	-5.60	0
FBgn0001247	FBtr0273273	1.4163	1	1	1	0.4393	-2.10	2.3846	346	-10.30	0
FBgn0001248	FBtr0076667	2.0554	0	0	0	0.3684	-0.80	2.6701	114	-10.20	0
FBgn0001250	FBtr0074357	0.5711	0	0	0	0.4319	-0.10	3.8950	257	-5.60	0
FBgn0001253	FBtr0076606	0.4725	1	1	0	0.4492	-10.70	0.1962	354	-8.50	0
FBgn0001254	FBtr0073141	0.3913	0	0	0	0.4430	-4.50	0.6603	79	-8.10	0
FBgn0001255	FBtr0310412	0.5663	0	0	0	0.4923	-2.40	0.8335	65	-2.40	0
FBgn0001256	FBtr0075842	0.2565	0	0	0	0.5250	NA	3.6241	40	NA	0
FBgn0001257	FBtr0333569	0.1458	4	4	3	0.5000	-0.60	2.5493	732	-6.80	0
FBgn0001258	FBtr0077008	0.3901	0	0	0	0.4130	0.00	3.3067	138	-6.70	0
FBgn0001259	FBtr0078183	0.1054	0	0	0	0.5000	-2.30	0.0103	118	-9.80	0
FBgn0001269	FBtr0088069	0.2526	3	1	0	0.4776	-1.70	-2.7424	268	-6.70	0
FBgn0001276	FBtr0088154	3.7076	0	0	0	0.3718	-1.00	0.1589	78	-3.10	0
FBgn0001280	FBtr0085595	2.2053	0	0	0	0.3951	-6.70	3.2959	81	-5.80	0
FBgn0001281	FBtr0085598	0.0000	0	0	0	0.3222	-0.90	2.8711	90	-2.00	0
FBgn0001291	FBtr0088411	0.9093	0	0	0	0.3915	-4.10	2.8411	235	0.00	0
FBgn0001296	FBtr0082666	0.1472	0	0	0	0.5885	-3.90	0.8680	192	-11.40	0
FBgn0001297	FBtr0099989	0.2648	0	0	0	0.5212	-3.90	2.6195	708	-14.20	0
FBgn0001301	FBtr0081042	2.2638	0	0	0	0.5395	-5.40	-4.1070	152	-12.10	0
FBgn0001308	FBtr0087184	1.6832	2	2	1	0.4774	-0.80	0.9732	486	-4.60	0
FBgn0001311	FBtr0078800	0.2206	0	0	0	0.5344	-12.30	-0.6183	131	-3.70	0
FBgn0001316	FBtr0112808	1.2819	23	23	22	0.4135	-4.90	3.3067	1098	-7.50	0
FBgn0001319	FBtr0112809	0.3906	0	0	0	0.5319	-18.20	-1.6513	517	-6.90	0
FBgn0001320	FBtr0078283	0.7395	0	0	0	0.3882	0.00	2.7378	304	-4.70	0
FBgn0001321	FBtr0082194	0.3906	3	3	2	0.3730	-1.60	2.0869	445	-5.90	0
FBgn0001323	FBtr0078212	0.3313	1	1	1	0.4066	-10.60	2.4619	964	-7.80	0
FBgn0001324	FBtr0074884	0.8065	0	0	0	0.4355	-2.50	0.7053	62	-2.30	0
FBgn0001325	FBtr0072449	0.8707	1	1	1	0.3607	-2.40	-4.3667	341	-7.90	0
FBgn0001330	FBtr0070419	1.0376	1	1	1	0.3008	-13.90	1.3583	133	-6.60	0
FBgn0001341	FBtr0070119	1.9264	0	0	0	0.3805	0.00	2.1649	113	-3.50	0
FBgn0001404	FBtr0070439	0.5654	7	6	4	0.4742	0.00	3.1367	1493	-5.80	0
FBgn0001491	FBtr0073460	2.8151	1	1	1	0.3008	-1.30	0.7305	123	-5.10	0
FBgn0001565	FBtr0343853	0.2589	0	0	0	0.4842	-4.30	1.9218	95	-5.80	0
FBgn0001612	FBtr0073841	0.8769	3	3	1	0.4351	-10.20	0.8540	285	-4.60	0
FBgn0001624	FBtr0073488	3.3872	11	10	7	0.3852	-1.80	0.8404	810	-3.60	0
FBgn0001941	FBtr0079179	1.1698	1	1	0	0.4898	0.00	3.0691	147	-3.60	0
FBgn0001942	FBtr0079176	0.5998	0	0	0	0.3429	-4.40	2.4339	70	-5.90	0
FBgn0001961	FBtr0080569	0.6419	0	0	0	0.5136	-2.40	1.7901	257	-5.60	0
FBgn0001965	FBtr0080541	0.7742	1	1	1	0.5477	-8.70	1.2418	398	-7.80	1
FBgn0001970	FBtr0080629	0.2530	1	1	1	0.4141	-1.70	-2.4299	128	-9.40	0
FBgn0001974	FBtr0080696	2.2211	0	0	0	0.4177	-6.40	-0.3889	79	-2.60	0
FBgn0001977	FBtr0080725	1.4829	0	0	0	0.3837	-3.50	3.3086	86	-1.20	0
FBgn0001978	FBtr0080706	0.2921	1	1	0	0.5098	-6.10	-0.6659	410	-7.90	0
FBgn0001981	FBtr0080734	0.8206	1	1	1	0.3816	-0.80	1.9340	228	-0.50	0
FBgn0001983	FBtr0080740	0.5879	0	0	0	0.4133	-2.50	2.2466	150	-8.10	0
FBgn0001986	FBtr0080760	1.7800	1	1	1	0.4149	-1.30	-0.3014	94	-5.40	0
FBgn0001987	FBtr0080768	0.3839	0	0	0	0.5526	-9.20	1.7857	76	-10.30	0
FBgn0001989	FBtr0343722	0.9863	0	0	0	0.4020	-0.90	4.2326	102	-4.50	0
FBgn0001990	FBtr0080764	1.6983	0	0	0	0.4492	-6.30	0.8787	118	-5.40	0
FBgn0001994	FBtr0080854	0.9809	5	5	5	0.4510	-1.40	2.6232	541	-6.90	0
FBgn0001995	FBtr0080843	0.7492	0	0	0	0.4400	-0.70	2.3354	50	-0.90	0
FBgn0002021	FBtr0081177	0.0739	1	1	1	0.2368	0.00	2.6426	114	-4.40	0
FBgn0002022	FBtr0081143	1.4176	0	0	0	0.4405	-8.90	4.2244	84	-0.40	0
FBgn0002023	FBtr0081170	0.0673	2	2	1	0.4082	-4.40	0.6118	294	-4.20	0
FBgn0002031	FBtr0081164	0.7462	0	0	0	0.3333	0.00	1.3476	117	-4.10	0
FBgn0002036	FBtr0081155	0.1541	1	1	1	0.3826	-4.30	-1.4659	379	-1.00	0
FBgn0002044	FBtr0081245	0.4214	1	1	1	0.4532	-2.20	-0.5876	331	-6.40	0
FBgn0002069	FBtr0087784	0.2719	0	0	0	0.4615	-7.10	3.0691	117	-8.00	0
FBgn0002121	FBtr0078170	2.0330	1	1	1	0.3731	0.00	-0.8340	386	-5.60	0
FBgn0002174	FBtr0089504	0.2595	4	3	1	0.3699	-0.20	3.2125	73	-10.00	0
FBgn0002183	FBtr0072865	0.3311	1	1	0	0.4478	-4.50	1.4193	134	-1.20	0
FBgn0002283	FBtr0307336	0.6385	1	1	1	0.4881	-1.80	1.4916	295	-3.20	0
FBgn0002284	FBtr0075360	3.4857	0	0	0	0.3600	-2.60	2.4469	100	-6.60	0
FBgn0002306	FBtr0334884	0.5386	0	0	0	0.3840	-0.60	3.6703	125	-7.10	0
FBgn0002354	FBtr0082703	0.3417	0	0	0	0.3623	-8.50	1.1452	69	-3.80	0
FBgn0002413	FBtr0085743	3.1923	4	4	4	0.4419	0.00	4.6059	396	-8.70	0
FBgn0002431	FBtr0082090	3.2172	2	2	2	0.3778	-3.80	3.2504	90	-5.30	0
FBgn0002441	FBtr0085175	1.0524	8	8	8	0.3977	-1.10	2.9444	787	-2.60	0
FBgn0002466	FBtr0075970	1.7352	2	2	2	0.4189	-1.80	0.7325	148	-8.30	0
FBgn0002521	FBtr0089205	4.5303	5	5	5	0.3297	-2.20	1.9591	182	-2.60	0
FBgn0002524	FBtr0343735	2.0526	0	0	0	0.3936	-7.50	1.7036	94	-1.20	0
FBgn0002525	FBtr0079100	1.8680	0	0	0	0.4206	-1.80	1.5940	126	-0.10	0
FBgn0002526	FBtr0077014	0.5131	1	0	0	0.4638	-10.90	2.9932	207	-12.80	0
FBgn0002531	FBtr0088763	0.0890	0	0	0	0.4762	-3.70	1.7502	42	-3.70	0
FBgn0002534	FBtr0088743	0.0000	0	0	0	0.3913	-3.80	4.0979	46	-3.80	0
FBgn0002535	FBtr0333555	0.0000	0	0	0	0.4082	-2.90	3.7163	49	-2.90	0
FBgn0002542	FBtr0081758	0.4367	1	1	1	0.3469	-4.40	2.9706	98	-4.70	0
FBgn0002543	FBtr0077941	0.6043	6	6	4	0.4792	-3.80	3.2651	288	-8.40	0
FBgn0002552	FBtr0088651	0.1118	3	3	0	0.5135	-10.10	-1.0910	520	-11.50	0
FBgn0002561	FBtr0070074	2.4768	0	0	0	0.3733	-2.40	1.2947	75	-7.90	0
FBgn0002565	FBtr0345352	0.0177	0	0	0	0.5294	NA	1.3115	17	NA	NA
FBgn0002566	FBtr0111125	1.9171	0	0	0	0.2574	-2.90	-1.1473	101	-4.00	0
FBgn0002567	FBtr0089934	0.2960	3	2	0	0.4557	-9.60	-3.8903	610	-7.20	0
FBgn0002570	FBtr0088759	0.2033	0	0	0	0.4000	NA	3.6965	20	NA	NA
FBgn0002571	FBtr0088758	0.4657	0	0	0	0.5278	NA	-0.0208	36	NA	NA
FBgn0002573	FBtr0075862	0.6025	0	0	0	0.4128	-2.20	4.3264	218	-8.90	0
FBgn0002577	FBtr0073555	0.6069	0	0	0	0.4552	-2.70	2.9878	435	-6.20	0
FBgn0002578	FBtr0084957	0.8541	0	0	0	0.3263	0.00	3.9293	95	-0.30	0
FBgn0002579	FBtr0345321	0.1457	0	0	0	0.3810	NA	2.8689	21	NA	NA
FBgn0002590	FBtr0074406	0.2229	0	0	0	0.4355	-6.20	3.5521	62	-6.70	0
FBgn0002592	FBtr0084981	0.6522	0	0	0	0.5093	-3.10	3.0384	108	-7.80	0
FBgn0002593	FBtr0331932	0.0285	0	0	0	0.4390	-6.20	1.6199	123	-5.70	0
FBgn0002607	FBtr0072406	0.1425	0	0	0	0.5000	NA	1.1385	36	NA	NA
FBgn0002609	FBtr0084958	0.2325	2	2	2	0.4213	0.00	0.2719	197	-3.30	0
FBgn0002622	FBtr0346349	0.1683	0	0	0	0.4884	-2.80	3.9449	43	-2.80	0
FBgn0002626	FBtr0085592	0.1558	0	0	0	0.4571	NA	2.7658	35	NA	NA
FBgn0002629	FBtr0084980	0.9525	0	0	0	0.4302	-2.10	1.5572	86	-2.90	0
FBgn0002631	FBtr0084979	0.6206	0	0	0	0.3855	0.00	4.2089	83	-6.70	0
FBgn0002632	FBtr0084959	0.4597	0	0	0	0.3973	-2.60	1.7148	73	-0.90	0
FBgn0002633	FBtr0084960	0.5014	0	0	0	0.4000	0.00	2.9299	125	-3.90	0
FBgn0002638	FBtr0077075	0.7769	1	0	0	0.5246	-2.40	1.8834	183	-14.30	0
FBgn0002641	FBtr0077306	0.4867	3	3	3	0.4622	-1.70	2.8458	119	-5.00	0
FBgn0002643	FBtr0087596	0.6573	6	6	6	0.4284	-6.10	-3.5511	740	-6.20	0
FBgn0002645	FBtr0085875	3.2556	0	0	0	0.4135	-2.00	0.6160	445	-5.10	0
FBgn0002673	FBtr0331444	1.2436	0	0	0	0.4310	-2.40	1.4381	174	-5.20	0
FBgn0002707	FBtr0343574	1.4913	0	0	0	0.3750	-5.40	0.1051	72	-3.90	0
FBgn0002709	FBtr0100640	0.1145	8	8	2	0.5238	-5.50	0.2275	945	-4.00	0
FBgn0002715	FBtr0342979	1.3773	1	1	1	0.3721	-3.80	-0.2273	86	-1.00	0
FBgn0002716	FBtr0086461	0.3052	6	6	6	0.4176	-2.00	2.9995	886	-4.60	0
FBgn0002719	FBtr0330025	0.1548	0	0	0	0.5155	-1.60	2.7315	258	-9.00	0
FBgn0002723	FBtr0073521	0.1332	2	2	1	0.3750	-5.80	4.2326	744	-9.70	0
FBgn0002732	FBtr0084956	0.4284	0	0	0	0.4000	0.00	2.9444	70	-4.60	0
FBgn0002733	FBtr0084982	0.3847	0	0	0	0.4308	0.00	4.6059	130	-5.00	0
FBgn0002734	FBtr0084954	1.0971	0	0	0	0.4505	0.00	3.2849	111	-6.90	0
FBgn0002735	FBtr0084955	0.4327	0	0	0	0.4022	0.00	3.2959	92	-9.50	0
FBgn0002736	FBtr0071569	1.8752	0	0	0	0.3419	-5.20	0.7742	117	-4.60	0
FBgn0002772	FBtr0085196	0.7261	0	0	0	0.4462	-4.20	4.2244	65	-3.40	0
FBgn0002773	FBtr0089747	0.3633	0	0	0	0.5077	-4.70	2.6724	65	-7.00	0
FBgn0002774	FBtr0086031	1.4809	0	0	0	0.2619	-2.20	1.4743	84	-1.60	0
FBgn0002775	FBtr0076926	0.7800	0	0	0	0.3514	-1.50	-0.0677	111	-1.50	0
FBgn0002778	FBtr0075627	0.2433	7	6	4	0.4074	-1.10	3.4786	540	-8.70	0
FBgn0002780	FBtr0310268	2.8370	0	0	0	0.4174	-0.60	4.2743	115	0.00	0
FBgn0002781	FBtr0084079	1.2602	0	0	0	0.5149	-14.60	3.0691	773	-4.10	0
FBgn0002783	FBtr0083238	1.9488	0	0	0	0.3564	-2.60	2.5149	101	-0.20	0
FBgn0002787	FBtr0072290	1.6994	0	0	0	0.4649	0.00	2.5927	185	-2.80	0
FBgn0002789	FBtr0087745	1.9787	0	0	0	0.4658	-1.20	2.5971	73	-8.00	0
FBgn0002791	FBtr0072156	0.9719	1	1	1	0.3590	-3.50	-0.5453	78	-4.80	0
FBgn0002868	FBtr0334686	0.9553	0	0	0	0.3920	-2.10	2.5330	125	-4.40	0
FBgn0002872	FBtr0072856	0.8756	0	0	0	0.5385	NA	1.0304	26	NA	NA
FBgn0002873	FBtr0332622	0.8448	3	3	3	0.3866	-4.20	1.9562	388	-7.80	0
FBgn0002878	FBtr0073817	0.4425	0	0	0	0.5000	-6.50	1.3780	108	-5.10	0
FBgn0002887	FBtr0100473	0.2165	0	0	0	0.2843	-1.30	2.7889	102	-8.30	0
FBgn0002891	FBtr0088831	0.4004	0	0	0	0.3803	-8.40	2.8281	71	-2.30	0
FBgn0002899	FBtr0076689	0.7128	0	0	0	0.5172	NA	0.1334	29	NA	NA
FBgn0002901	FBtr0075122	0.5548	1	1	1	0.3861	-2.60	1.9157	101	-1.10	0
FBgn0002905	FBtr0082662	0.2858	0	0	0	0.4022	-3.20	1.6147	92	-2.00	0
FBgn0002906	FBtr0082434	0.4091	1	1	1	0.3571	-3.90	-0.6641	126	-3.80	0
FBgn0002909	FBtr0344453	0.5755	4	4	4	0.5279	-3.20	1.6403	394	-3.10	0
FBgn0002914	FBtr0074169	0.6602	7	7	4	0.4343	-0.90	1.3348	624	-9.20	0
FBgn0002921	FBtr0089510	1.3625	0	0	0	0.1923	NA	2.4982	26	NA	NA
FBgn0002924	FBtr0085534	0.8088	0	0	0	0.4628	-5.00	-0.6273	121	-6.50	0
FBgn0002931	FBtr0290323	1.6108	1	1	1	0.3525	-6.20	-1.4144	295	-1.70	0
FBgn0002932	FBtr0082004	2.1093	2	2	2	0.3652	-0.20	1.5979	282	-4.40	0
FBgn0002939	FBtr0081031	0.0822	0	0	0	0.4595	NA	1.4058	37	NA	NA
FBgn0002945	FBtr0075039	0.4619	5	4	2	0.4482	-6.40	0.4069	1082	-7.60	0
FBgn0002948	FBtr0073516	0.0988	2	1	0	0.3816	-0.20	-1.7463	152	-7.90	0
FBgn0002962	FBtr0335019	0.0980	1	1	0	0.4106	-7.10	0.6959	263	-2.80	0
FBgn0002973	FBtr0079821	1.5133	3	3	0	0.4352	-6.30	3.1860	563	-2.30	0
FBgn0002985	FBtr0077557	0.9013	0	0	0	0.4724	-2.20	0.4970	398	-2.20	0
FBgn0002989	FBtr0077673	1.2142	0	0	0	0.4600	-3.90	0.8627	50	-5.10	0
FBgn0003002	FBtr0078836	0.8748	2	2	2	0.4471	0.00	1.9433	293	-6.60	0
FBgn0003008	FBtr0072152	1.8580	0	0	0	0.3580	-2.30	-0.0026	81	-4.40	0
FBgn0003009	FBtr0343199	4.8543	0	0	0	0.2000	NA	2.9685	25	NA	NA
FBgn0003015	FBtr0081954	0.1746	0	0	0	0.5500	NA	0.0126	20	NA	NA
FBgn0003016	FBtr0301494	0.8017	4	3	2	0.4199	-7.40	2.3622	662	-13.40	0
FBgn0003023	FBtr0333146	0.1468	0	0	0	0.5270	-3.10	1.2694	74	-7.90	0
FBgn0003028	FBtr0070740	0.0262	5	1	0	0.5766	-31.60	-2.8609	1169	-7.50	1
FBgn0003041	FBtr0076772	1.8851	8	7	6	0.4355	-0.90	-1.3485	496	-16.10	0
FBgn0003042	FBtr0078405	0.1371	0	0	0	0.3182	-0.60	3.5541	110	-4.50	0
FBgn0003044	FBtr0086735	0.1598	10	5	2	0.4418	-2.30	1.6162	498	-6.90	0
FBgn0003048	FBtr0332381	1.1742	1	1	1	0.5590	-8.20	2.6218	415	-7.40	0
FBgn0003053	FBtr0100265	0.2475	1	1	1	0.3449	-2.50	2.5826	519	-6.90	0
FBgn0003057	FBtr0074400	0.4885	0	0	0	0.4444	-5.60	1.0323	54	-5.50	0
FBgn0003062	FBtr0071982	0.5019	0	0	0	0.4427	-6.20	2.4485	131	-7.00	0
FBgn0003065	FBtr0085859	0.2499	0	0	0	0.5234	-0.20	-0.2977	107	-6.90	0
FBgn0003067	FBtr0086701	0.4977	3	3	3	0.3395	-0.30	3.6466	271	-6.90	0
FBgn0003071	FBtr0088421	1.2955	1	1	0	0.4651	-3.80	3.1970	559	-9.90	0
FBgn0003074	FBtr0088681	0.3685	0	0	0	0.5156	-7.20	1.7298	320	-4.40	0
FBgn0003076	FBtr0075492	0.2824	0	0	0	0.5366	NA	0.2545	41	NA	0
FBgn0003079	FBtr0070401	1.1203	4	4	4	0.4779	-0.80	2.4217	588	-4.10	0
FBgn0003082	FBtr0088839	0.0385	1	0	0	0.3814	-3.00	-1.3616	97	-6.80	0
FBgn0003087	FBtr0080001	6.7279	1	1	1	0.3455	0.00	4.6059	110	-2.50	0
FBgn0003089	FBtr0075007	0.4917	0	0	0	0.4581	-2.00	-4.9728	179	-5.20	0
FBgn0003090	FBtr0089044	0.2708	2	2	2	0.3961	0.00	3.2670	765	-8.10	0
FBgn0003093	FBtr0301516	0.0640	12	12	3	0.5275	-17.70	-2.8210	908	-9.10	0
FBgn0003114	FBtr0086306	2.4793	1	1	0	0.3478	NA	2.2046	23	NA	NA
FBgn0003116	FBtr0070389	0.9285	1	1	1	0.4270	-0.90	-0.1376	89	-3.20	0
FBgn0003117	FBtr0083221	0.8498	5	5	5	0.3806	-5.90	1.2929	494	-4.40	0
FBgn0003118	FBtr0089717	0.6517	4	4	3	0.4432	-7.30	1.6067	783	-4.10	0
FBgn0003124	FBtr0100318	1.6185	1	1	0	0.5019	-5.70	3.1352	263	-4.40	0
FBgn0003134	FBtr0084642	2.3907	2	2	1	0.5141	-6.20	2.5330	389	-3.50	0
FBgn0003137	FBtr0301838	0.3828	2	2	1	0.4569	-10.60	3.8539	383	-9.60	0
FBgn0003139	FBtr0331432	0.4102	0	0	0	0.5870	-11.60	1.3765	46	-11.80	0
FBgn0003141	FBtr0089395	3.1464	0	0	0	0.4201	-4.30	0.5619	369	-9.20	0
FBgn0003145	FBtr0080298	0.6358	0	0	0	0.4631	-8.00	0.6558	298	-7.50	0
FBgn0003149	FBtr0076594	0.6601	0	0	0	0.4089	0.00	2.6126	225	-3.50	0
FBgn0003159	FBtr0070402	0.1331	1	1	0	0.4527	-1.30	1.4436	296	-4.30	0
FBgn0003162	FBtr0071578	1.9024	0	0	0	0.5250	0.00	1.7809	160	-6.80	0
FBgn0003165	FBtr0081990	0.6640	3	2	1	0.3571	-5.80	-0.9664	871	-8.90	0
FBgn0003169	FBtr0082977	1.7048	2	2	2	0.4891	-6.80	2.7987	458	-8.90	0
FBgn0003174	FBtr0332462	0.1758	1	1	1	0.4468	-3.60	2.2112	517	-6.40	0
FBgn0003175	FBtr0071838	0.2731	5	5	3	0.4486	-6.40	0.0294	555	-15.70	0
FBgn0003187	FBtr0080996	0.4532	2	1	0	0.4407	-11.10	3.2951	447	-5.60	0
FBgn0003189	FBtr0340156	1.4067	0	0	0	0.4183	-2.60	2.2926	153	-8.90	0
FBgn0003204	FBtr0343043	0.0874	0	0	0	0.4899	-4.70	2.1267	198	-5.30	0
FBgn0003205	FBtr0082122	2.1692	0	0	0	0.5125	-4.70	0.5560	441	-5.10	0
FBgn0003206	FBtr0073212	1.9227	0	0	0	0.4660	-5.10	0.1593	103	-13.30	0
FBgn0003209	FBtr0303868	0.2865	13	13	4	0.3963	-3.10	-3.5560	429	-1.40	0
FBgn0003210	FBtr0343568	2.3684	1	1	1	0.4206	-5.70	0.8594	321	-2.20	0
FBgn0003218	FBtr0331717	0.3282	2	1	0	0.5339	-4.40	2.6126	487	-8.10	0
FBgn0003227	FBtr0334595	0.1527	0	0	0	0.5333	NA	1.1348	15	NA	NA
FBgn0003231	FBtr0081253	2.2457	0	0	0	0.4097	-3.10	1.8688	349	-10.70	0
FBgn0003254	FBtr0086512	0.3928	2	2	1	0.4724	-8.40	-0.1082	688	-5.20	0
FBgn0003256	FBtr0113700	6.7171	0	0	0	0.2588	0.00	-0.0357	85	-2.10	0
FBgn0003257	FBtr0084038	2.5572	0	0	0	0.4356	-1.40	1.4916	101	-3.20	0
FBgn0003261	FBtr0078650	2.4083	0	0	0	0.4983	-2.10	0.3250	297	-9.70	0
FBgn0003268	FBtr0085795	0.3774	0	0	0	0.3889	-4.30	1.3940	72	-6.60	0
FBgn0003270	FBtr0081081	3.7106	0	0	0	0.4667	NA	2.6388	15	NA	NA
FBgn0003274	FBtr0087105	0.0364	0	0	0	0.4149	-2.00	2.2218	94	-8.00	0
FBgn0003275	FBtr0078787	2.1299	0	0	0	0.4130	-2.50	-0.5075	92	-8.10	0
FBgn0003277	FBtr0073542	1.6980	1	1	1	0.5083	-10.00	1.0826	360	-3.50	0
FBgn0003278	FBtr0078054	1.7044	0	0	0	0.3838	-3.40	2.5472	99	-4.40	0
FBgn0003279	FBtr0085248	0.0852	0	0	0	0.3542	-4.70	2.8803	96	-8.00	0
FBgn0003285	FBtr0070562	0.6173	1	1	1	0.3963	-6.50	3.0384	540	-5.70	0
FBgn0003292	FBtr0076146	1.4674	6	6	5	0.4110	-0.50	-1.4667	438	-7.50	0
FBgn0003300	FBtr0077279	1.0592	0	0	0	0.4409	-6.60	0.7075	254	-5.40	0
FBgn0003301	FBtr0333655	0.3771	0	0	0	0.5448	-23.80	-2.6231	268	-8.50	0
FBgn0003302	FBtr0307288	0.1192	1	1	0	0.3662	-2.70	1.4780	71	-4.20	0
FBgn0003308	FBtr0082704	0.7912	0	0	0	0.4328	-7.10	1.6133	238	-10.50	0
FBgn0003310	FBtr0077994	0.2909	2	2	2	0.5066	-2.90	-0.9352	227	-3.40	0
FBgn0003312	FBtr0082475	0.1203	0	0	0	0.6509	-13.40	-1.5758	106	-7.90	0
FBgn0003313	FBtr0080237	1.0685	0	0	0	0.6071	NA	1.8312	28	NA	NA
FBgn0003317	FBtr0088832	1.9075	0	0	0	0.4074	-5.30	1.2260	54	-6.10	0
FBgn0003321	FBtr0073411	2.4578	1	1	1	0.3750	-0.90	0.7705	504	-1.70	0
FBgn0003326	FBtr0087856	0.5936	1	1	1	0.4689	-2.90	-3.1749	322	-5.70	0
FBgn0003328	FBtr0087370	0.4446	0	0	0	0.4855	-6.30	2.8696	173	-5.20	0
FBgn0003330	FBtr0085245	0.9943	0	0	0	0.3509	-3.30	2.5249	114	-3.20	0
FBgn0003334	FBtr0082102	0.0671	6	3	0	0.4605	-2.50	1.6649	456	-2.40	0
FBgn0003339	FBtr0081658	0.5150	0	0	0	0.4416	-2.40	2.8533	471	-8.20	0
FBgn0003345	FBtr0308132	0.3511	3	3	1	0.5303	-8.40	1.1607	198	-6.90	0
FBgn0003346	FBtr0334174	1.9774	1	1	1	0.3768	-2.10	0.5585	138	0.00	0
FBgn0003353	FBtr0343342	0.2646	2	2	0	0.4682	-10.00	3.3256	534	-5.20	0
FBgn0003360	FBtr0073421	2.2920	0	0	0	0.3962	-4.90	4.2987	106	-9.20	0
FBgn0003371	FBtr0070467	1.6154	3	3	2	0.4272	-3.80	0.4520	646	-5.40	0
FBgn0003377	FBtr0076095	0.0000	0	0	0	0.4000	NA	1.9678	35	NA	NA
FBgn0003378	FBtr0076160	0.0000	0	0	0	0.3333	NA	2.2987	39	NA	NA
FBgn0003382	FBtr0332463	0.0475	0	0	0	0.4413	-5.30	0.7460	528	-7.40	0
FBgn0003391	FBtr0071546	2.8098	4	4	4	0.4378	-9.50	-1.7477	724	-3.70	0
FBgn0003392	FBtr0301596	1.1732	0	0	0	0.4828	-8.60	1.9456	116	-5.30	0
FBgn0003396	FBtr0088098	0.3414	1	1	1	0.3354	-0.80	1.2606	161	-0.50	0
FBgn0003401	FBtr0072237	0.2080	0	0	0	0.3913	-4.90	0.9898	92	-3.70	0
FBgn0003410	FBtr0075332	0.6690	12	12	6	0.4297	-4.30	-2.3969	896	-6.60	1
FBgn0003411	FBtr0073461	1.0982	0	0	0	0.4776	-0.70	3.0295	67	-3.90	0
FBgn0003415	FBtr0333284	0.3296	4	4	4	0.3648	-3.90	0.7301	603	-4.80	0
FBgn0003416	FBtr0074230	1.0880	2	2	2	0.4908	-7.90	0.6773	271	-3.80	0
FBgn0003423	FBtr0077208	0.1605	0	0	0	0.4163	-1.90	-0.7186	233	-5.70	0
FBgn0003430	FBtr0077499	1.6393	0	0	0	0.3853	-0.10	3.9235	109	-6.60	0
FBgn0003435	FBtr0110898	0.6868	0	0	0	0.5944	-10.70	-2.8274	180	-6.50	0
FBgn0003444	FBtr0078129	0.4731	2	2	1	0.4098	-1.20	-4.4043	244	-6.20	0
FBgn0003447	FBtr0301677	1.6940	1	1	1	0.4379	-7.20	2.3430	354	-8.10	0
FBgn0003448	FBtr0080739	1.0645	0	0	0	0.4837	0.00	3.8573	153	-8.40	0
FBgn0003449	FBtr0070748	1.7412	0	0	0	0.4107	-4.70	1.0067	112	-3.80	0
FBgn0003450	FBtr0082716	0.5734	3	3	3	0.2623	0.00	0.8170	61	-1.20	0
FBgn0003459	FBtr0075728	2.1206	0	0	0	0.4746	-5.30	-0.2669	177	-3.40	0
FBgn0003460	FBtr0088970	0.4207	1	1	0	0.4818	0.00	1.8760	795	-6.80	0
FBgn0003462	FBtr0076229	2.4898	1	1	1	0.3663	-1.60	2.8802	101	-4.70	0
FBgn0003463	FBtr0074063	0.5139	2	2	1	0.3775	0.00	3.5782	816	-6.50	0
FBgn0003464	FBtr0089679	0.3415	0	0	0	0.5471	-9.20	1.2441	329	-13.40	0
FBgn0003475	FBtr0301884	0.9983	6	6	6	0.3960	-5.70	1.6861	601	-5.30	0
FBgn0003479	FBtr0085589	1.7757	0	0	0	0.3776	-1.80	-0.9170	98	-11.30	0
FBgn0003480	FBtr0082933	0.0289	1	1	1	0.5000	-4.80	0.8604	160	-3.30	0
FBgn0003482	FBtr0085116	0.9813	0	0	0	0.3295	-1.50	1.6000	88	-6.60	0
FBgn0003483	FBtr0083183	2.3998	1	1	1	0.3281	-5.10	2.1267	64	-9.10	0
FBgn0003486	FBtr0077130	1.0863	0	0	0	0.4510	-6.30	2.9135	51	-0.70	0
FBgn0003495	FBtr0085138	1.9149	4	4	0	0.4437	-2.80	-0.2733	861	-6.80	0
FBgn0003502	FBtr0079615	0.9459	2	2	1	0.4124	-5.10	0.4899	434	-5.80	0
FBgn0003507	FBtr0083215	0.8167	0	0	0	0.5581	-12.70	0.6718	86	-6.60	0
FBgn0003510	FBtr0085557	0.9556	0	0	0	0.4222	-7.20	1.8495	45	-5.30	0
FBgn0003511	FBtr0085556	0.7441	0	0	0	0.4255	-7.00	-0.9141	94	-3.00	0
FBgn0003512	FBtr0085558	1.2881	0	0	0	0.3841	-12.70	1.6147	138	-3.80	0
FBgn0003514	FBtr0070877	2.5979	1	1	0	0.4919	0.00	1.6886	246	-5.40	0
FBgn0003517	FBtr0070290	0.0435	1	0	0	0.5056	-4.30	1.6086	180	-7.40	0
FBgn0003520	FBtr0301614	1.1878	4	4	3	0.4270	-6.40	2.2266	274	-2.10	0
FBgn0003525	FBtr0085397	1.3623	3	3	3	0.3804	-0.40	3.6466	397	-2.90	0
FBgn0003527	FBtr0087825	0.3493	0	0	0	0.4024	-6.50	2.9685	82	0.00	0
FBgn0003545	FBtr0340277	1.8038	0	0	0	0.4200	0.00	3.5466	100	-5.70	0
FBgn0003557	FBtr0339529	1.1777	1	1	1	0.5126	-7.30	0.2082	357	-0.40	1
FBgn0003559	FBtr0113733	1.2229	3	3	1	0.4425	-2.20	1.0230	287	-3.20	0
FBgn0003567	FBtr0082946	1.9465	0	0	0	0.3951	-6.40	3.5979	81	-2.30	0
FBgn0003575	FBtr0070120	2.7488	4	4	4	0.4048	-5.60	0.4163	504	-5.30	0
FBgn0003598	FBtr0301657	3.2684	0	0	0	0.3947	-5.90	-0.4767	152	-9.40	0
FBgn0003607	FBtr0079635	2.4669	0	0	0	0.3642	-2.70	4.6059	162	-4.70	0
FBgn0003612	FBtr0088578	1.0748	2	2	2	0.4350	-6.30	-0.6089	246	-5.70	0
FBgn0003638	FBtr0070176	0.6137	3	3	3	0.4233	-6.30	-0.1773	215	-1.60	0
FBgn0003651	FBtr0082562	0.1816	2	2	1	0.3862	-3.90	3.9037	246	-1.10	0
FBgn0003654	FBtr0089397	2.0883	3	3	3	0.4322	-5.00	1.7929	199	-0.20	0
FBgn0003655	FBtr0070922	0.2901	0	0	0	0.4554	-8.40	0.4353	112	-5.20	0
FBgn0003656	FBtr0071125	0.4204	2	2	2	0.4518	-6.10	1.9962	695	-2.90	0
FBgn0003660	FBtr0088362	1.4465	0	0	0	0.3767	-1.70	3.3348	146	-4.10	0
FBgn0003676	FBtr0084291	0.7402	0	0	0	0.3611	-3.00	2.3208	108	-2.50	0
FBgn0003683	FBtr0075112	1.8293	0	0	0	0.3812	-0.10	0.7587	160	-3.30	0
FBgn0003687	FBtr0071679	3.5710	1	1	1	0.3895	-1.20	1.3328	190	-3.50	0
FBgn0003701	FBtr0340283	1.7359	2	2	2	0.4159	-2.60	3.2912	113	-7.80	0
FBgn0003714	FBtr0070459	1.6386	0	0	0	0.4136	-0.20	0.1001	191	-6.60	0
FBgn0003716	FBtr0079086	1.7687	0	0	0	0.3934	-3.70	2.6925	61	-4.80	0
FBgn0003719	FBtr0084691	0.6557	0	0	0	0.4923	-6.50	1.2219	65	-6.50	0
FBgn0003720	FBtr0085709	1.3901	0	0	0	0.4526	-2.70	-1.6762	232	-1.30	0
FBgn0003721	FBtr0089960	3.5160	0	0	0	0.4292	-2.20	3.9250	438	-6.30	0
FBgn0003731	FBtr0071654	0.5823	5	5	4	0.4462	0.00	1.9896	948	-5.60	0
FBgn0003732	FBtr0081287	0.8772	1	1	1	0.4481	-1.50	1.7580	270	-7.20	0
FBgn0003733	FBtr0088938	3.9284	1	1	1	0.3766	-2.30	1.9194	239	-4.90	0
FBgn0003741	FBtr0075364	2.1347	0	0	0	0.4286	NA	-2.9768	7	NA	NA
FBgn0003742	FBtr0089620	0.2633	1	1	1	0.4235	-2.40	-1.1513	170	-3.30	0
FBgn0003744	FBtr0074922	0.5501	0	0	0	0.5142	-3.30	-2.2958	212	-5.20	0
FBgn0003748	FBtr0071537	0.9331	1	1	1	0.4200	-11.90	1.6067	250	-6.40	0
FBgn0003751	FBtr0080078	0.9284	0	0	0	0.3739	-7.90	-0.0604	115	-6.70	0
FBgn0003862	FBtr0082949	0.2717	8	7	5	0.4348	-7.50	2.2918	713	-10.50	0
FBgn0003865	FBtr0073582	1.6441	0	0	0	0.4722	NA	-0.2009	36	NA	NA
FBgn0003866	FBtr0085906	0.3620	6	6	4	0.4279	0.00	3.3256	1213	-8.90	0
FBgn0003867	FBtr0084165	0.0335	0	0	0	0.4800	-11.30	-0.8989	75	-9.60	0
FBgn0003870	FBtr0085828	0.3333	7	4	0	0.4646	-4.30	-0.7630	495	-6.70	0
FBgn0003882	FBtr0302338	2.4156	2	2	2	0.4787	-12.80	2.9796	188	-12.30	0
FBgn0003884	FBtr0081639	1.5337	0	0	0	0.4196	-2.00	1.0044	143	-5.30	0
FBgn0003885	FBtr0081538	0.8765	2	2	2	0.4111	-3.10	1.7565	506	-4.60	0
FBgn0003886	FBtr0082087	0.2642	0	0	0	0.4118	-0.10	1.7857	102	-8.50	0
FBgn0003887	FBtr0086536	2.4751	0	0	0	0.3243	0.00	3.8795	111	-5.90	0
FBgn0003888	FBtr0072270	0.2567	0	0	0	0.5124	-1.40	2.7658	201	-5.30	0
FBgn0003890	FBtr0300611	0.2482	1	1	1	0.4541	-4.40	2.1937	229	-5.80	0
FBgn0003891	FBtr0071582	1.7125	0	0	0	0.4404	0.00	1.9850	495	-3.20	0
FBgn0003892	FBtr0089427	0.3733	7	7	4	0.4618	-9.00	2.7913	773	-9.40	0
FBgn0003896	FBtr0081112	0.5337	3	2	1	0.5021	-6.90	-1.3549	466	-6.40	0
FBgn0003900	FBtr0100130	0.8806	0	0	0	0.4348	-3.30	0.1112	161	-8.40	0
FBgn0003941	FBtr0077470	0.4074	0	0	0	0.4375	-6.50	-0.4896	64	-2.90	0
FBgn0003942	FBtr0080016	0.0774	0	0	0	0.4000	-14.00	2.0860	55	-5.10	0
FBgn0003943	FBtr0333142	2.9402	0	0	0	0.3171	0.00	3.2732	123	-3.20	0
FBgn0003944	FBtr0083350	0.4603	2	2	1	0.3655	-4.30	1.6668	963	-6.10	0
FBgn0003963	FBtr0333012	0.3553	0	0	0	0.3841	-2.80	0.9777	138	0.00	0
FBgn0003964	FBtr0070346	0.0748	2	1	0	0.5063	0.00	0.6599	399	-6.10	1
FBgn0003969	FBtr0074140	0.6793	3	3	3	0.3835	-2.20	2.6045	352	-8.00	0
FBgn0003977	FBtr0072037	0.7956	0	0	0	0.3663	-1.50	3.1515	101	-4.00	0
FBgn0003978	FBtr0081347	1.2949	1	1	0	0.4938	-5.50	0.1590	81	-6.40	0
FBgn0003984	FBtr0077082	0.3445	0	0	0	0.4625	-6.50	0.6616	2106	-11.80	0
FBgn0003997	FBtr0332862	0.5016	2	2	1	0.3545	0.00	2.9299	519	-3.70	0
FBgn0004003	FBtr0086510	0.3983	0	0	0	0.4844	-8.60	1.7167	64	-6.40	0
FBgn0004009	FBtr0079432	0.5203	7	7	2	0.4296	-3.80	2.0345	433	-6.20	0
FBgn0004028	FBtr0074520	0.9336	0	0	0	0.3786	0.00	4.6558	140	-6.90	0
FBgn0004049	FBtr0082793	1.0237	2	2	2	0.4508	-0.40	2.9642	712	-11.30	1
FBgn0004050	FBtr0100380	0.1422	3	3	1	0.4692	-0.30	-0.7470	341	-9.90	1
FBgn0004052	FBtr0075549	3.3876	0	0	0	0.4286	-2.30	-1.4674	63	-1.90	0
FBgn0004053	FBtr0081670	2.6512	0	0	0	0.4130	-3.30	1.7328	46	-3.30	0
FBgn0004054	FBtr0081671	3.7845	0	0	0	0.4355	-3.70	3.3656	62	-4.60	0
FBgn0004055	FBtr0072397	2.0941	3	3	2	0.4297	-0.30	1.8818	263	-6.20	0
FBgn0004057	FBtr0074748	0.5294	0	0	0	0.4971	-2.20	3.1108	350	-15.60	0
FBgn0004066	FBtr0074210	2.2833	0	0	0	0.3851	-2.90	2.8845	148	-1.40	0
FBgn0004087	FBtr0083295	0.4368	1	1	1	0.3704	NA	-0.2935	27	NA	NA
FBgn0004101	FBtr0072271	0.5155	0	0	0	0.5077	-9.90	1.8496	388	-13.50	0
FBgn0004102	FBtr0331738	1.0853	0	0	0	0.4981	-7.40	-1.2359	528	-5.30	0
FBgn0004103	FBtr0082595	2.5619	0	0	0	0.4847	-4.80	3.1706	229	-12.30	0
FBgn0004106	FBtr0080051	3.3357	0	0	0	0.3412	-2.20	0.0553	85	-4.90	0
FBgn0004107	FBtr0083922	1.1865	0	0	0	0.3378	-4.90	-2.6819	74	-3.70	0
FBgn0004108	FBtr0075323	1.4665	0	0	0	0.3795	-2.70	2.2844	166	-6.90	0
FBgn0004110	FBtr0084086	0.7801	0	0	0	0.4963	-7.80	-0.9475	270	-4.50	0
FBgn0004117	FBtr0345212	0.5589	0	0	0	0.3377	-0.70	2.9796	77	-1.70	0
FBgn0004118	FBtr0084681	0.2223	0	0	0	0.3529	-2.80	4.0480	136	-8.80	0
FBgn0004132	FBtr0088953	2.5527	0	0	0	0.4079	-0.40	2.0203	76	-12.20	0
FBgn0004133	FBtr0088952	0.1467	0	0	0	0.4911	-1.20	0.5149	395	-10.80	0
FBgn0004143	FBtr0299565	4.3924	0	0	0	0.3182	-2.50	3.9037	110	-3.70	0
FBgn0004167	FBtr0300017	0.8971	0	0	0	0.4150	-1.90	0.1811	147	-5.60	0
FBgn0004169	FBtr0345131	0.4569	2	2	2	0.5164	-9.70	2.3151	275	-3.50	1
FBgn0004170	FBtr0070073	5.8659	0	0	0	0.3590	-4.50	-2.9591	117	-4.40	0
FBgn0004177	FBtr0343417	3.1204	0	0	0	0.4402	-1.40	-0.2418	259	-9.40	0
FBgn0004179	FBtr0078494	1.2792	0	0	0	0.4649	-5.00	1.1087	185	-1.50	0
FBgn0004197	FBtr0085128	0.2205	0	0	0	0.4286	-2.70	1.2655	434	-9.20	0
FBgn0004198	FBtr0071068	0.3152	2	2	1	0.3284	0.00	-2.9244	268	-2.20	0
FBgn0004227	FBtr0074233	2.2599	0	0	0	0.3178	0.00	3.8336	129	-5.40	0
FBgn0004228	FBtr0075602	0.4480	0	0	0	0.3465	-1.70	2.4716	101	-5.60	0
FBgn0004237	FBtr0300590	1.5009	0	0	0	0.3819	-9.30	0.7503	144	-4.00	0
FBgn0004359	FBtr0085065	0.0989	5	3	0	0.4385	-9.00	0.5554	659	-3.10	0
FBgn0004360	FBtr0339383	0.0480	7	6	1	0.4783	-5.90	-0.6460	1108	-8.00	0
FBgn0004362	FBtr0071708	1.9931	0	0	0	0.3404	-1.20	1.3594	94	-2.80	0
FBgn0004363	FBtr0080182	2.8363	0	0	0	0.3684	-2.10	3.8573	95	-3.10	0
FBgn0004364	FBtr0086309	0.4741	2	2	2	0.4091	-2.10	3.6703	374	-5.50	0
FBgn0004367	FBtr0074271	0.0434	0	0	0	0.4286	-8.40	3.3592	63	-13.70	0
FBgn0004368	FBtr0070724	1.3749	8	8	8	0.3792	-5.20	2.8388	298	-3.40	0
FBgn0004369	FBtr0303454	0.7312	3	3	3	0.4398	-3.90	-1.6568	382	-8.60	0
FBgn0004370	FBtr0330392	1.6079	3	3	3	0.3992	0.00	3.3196	521	-6.00	0
FBgn0004372	FBtr0073006	1.1711	0	0	0	0.2990	-5.00	0.9443	97	-3.50	0
FBgn0004373	FBtr0072516	0.8736	13	13	13	0.4696	-0.30	4.3264	1184	-4.60	0
FBgn0004374	FBtr0081332	0.4314	0	0	0	0.3500	0.00	1.1182	100	0.00	0
FBgn0004378	FBtr0072733	3.2529	0	0	0	0.4185	-3.20	2.7158	270	-0.10	0
FBgn0004379	FBtr0076499	0.8453	1	1	1	0.4074	-2.80	1.8533	162	-1.80	0
FBgn0004380	FBtr0077157	0.0626	0	0	0	0.4275	-3.70	0.6916	138	-5.20	0
FBgn0004381	FBtr0076030	0.0741	0	0	0	0.4511	-7.90	-0.0327	184	-5.70	0
FBgn0004387	FBtr0085211	1.9570	8	8	8	0.4424	-1.70	2.7193	773	-6.50	0
FBgn0004389	FBtr0085754	2.8701	0	0	0	0.4348	NA	3.2425	23	NA	NA
FBgn0004390	FBtr0076368	0.9652	5	5	5	0.4249	-12.00	1.6633	473	-2.40	0
FBgn0004391	FBtr0074077	1.0019	1	1	1	0.3585	-6.60	0.4178	106	-4.00	0
FBgn0004394	FBtr0080393	0.6086	1	1	0	0.3575	-2.40	2.5133	193	-6.60	0
FBgn0004395	FBtr0084403	3.7743	0	0	0	0.4211	NA	1.6090	19	NA	NA
FBgn0004396	FBtr0075558	0.6308	8	8	4	0.3535	-5.70	1.8760	1007	-3.90	0
FBgn0004397	FBtr0070420	0.7338	0	0	0	0.4858	-1.60	3.2888	212	-11.60	0
FBgn0004400	FBtr0086897	0.1890	0	0	0	0.5000	NA	-1.8812	40	NA	0
FBgn0004401	FBtr0304977	1.9162	0	0	0	0.4718	-4.90	3.2149	142	-9.40	0
FBgn0004403	FBtr0071094	0.1119	0	0	0	0.4138	-6.30	1.8234	58	-3.90	0
FBgn0004404	FBtr0071096	0.2250	0	0	0	0.5238	-5.60	1.8475	63	-5.60	0
FBgn0004406	FBtr0080571	0.3531	1	1	1	0.4815	-11.70	-0.9673	81	-9.70	0
FBgn0004407	FBtr0091627	0.3820	2	2	2	0.5535	-7.30	0.9100	477	-7.00	0
FBgn0004419	FBtr0079975	0.8441	1	1	0	0.3179	0.00	1.3586	195	-6.10	0
FBgn0004432	FBtr0074238	1.4682	0	0	0	0.5294	NA	2.1214	34	NA	NA
FBgn0004435	FBtr0087830	0.4540	10	10	3	0.3903	-5.70	0.1124	1281	-8.80	0
FBgn0004436	FBtr0306106	2.4284	0	0	0	0.4516	-6.70	2.9685	186	-4.90	0
FBgn0004449	FBtr0078509	2.4725	6	6	6	0.5320	-12.40	1.2954	671	-4.70	0
FBgn0004456	FBtr0073732	0.6785	1	1	1	0.3551	0.00	1.2381	352	-9.80	0
FBgn0004462	FBtr0074634	0.8528	0	0	0	0.4973	-1.70	-4.1492	368	-10.60	0
FBgn0004463	FBtr0087977	1.2660	0	0	0	0.3205	-1.30	3.2274	78	-3.40	0
FBgn0004465	FBtr0075359	0.3927	0	0	0	0.3659	-3.40	-1.1649	82	-10.20	0
FBgn0004507	FBtr0100485	0.9785	0	0	0	0.5377	-0.70	2.0402	199	-8.80	0
FBgn0004509	FBtr0089982	1.4705	7	7	4	0.4301	-2.70	2.6242	737	-6.50	0
FBgn0004510	FBtr0085088	0.3214	1	1	1	0.3810	-3.30	0.4527	126	-5.20	0
FBgn0004511	FBtr0073612	0.3498	0	0	0	0.4456	-1.20	2.9941	799	-10.50	0
FBgn0004512	FBtr0087801	0.5395	1	1	0	0.4391	-5.90	3.3004	230	-5.30	0
FBgn0004556	FBtr0075347	1.2852	0	0	0	0.3452	-1.10	0.9505	84	-4.70	0
FBgn0004567	FBtr0077500	0.4649	4	4	3	0.3743	-5.30	1.3828	358	-2.10	0
FBgn0004569	FBtr0075408	0.6130	2	2	2	0.4495	-0.10	0.3336	574	-7.40	0
FBgn0004574	FBtr0073263	0.6002	0	0	0	0.3791	-3.00	2.8543	182	-0.10	0
FBgn0004583	FBtr0078059	0.3665	6	6	6	0.4380	-7.80	0.1858	936	-4.80	0
FBgn0004584	FBtr0077678	0.2854	0	0	0	0.4455	-1.60	1.4349	211	-6.90	0
FBgn0004587	FBtr0082801	1.6739	0	0	0	0.4545	-3.60	0.3282	154	-6.10	0
FBgn0004595	FBtr0304605	0.4458	0	0	0	0.5132	-13.00	-2.5986	302	-5.90	0
FBgn0004597	FBtr0083010	1.9274	0	0	0	0.4324	-7.00	2.8303	148	-8.90	0
FBgn0004598	FBtr0074267	0.7975	1	1	1	0.4201	-3.90	1.3856	219	-9.70	0
FBgn0004606	FBtr0085702	0.1668	1	0	0	0.4006	0.00	2.3910	342	-4.50	0
FBgn0004607	FBtr0307167	0.9069	1	1	1	0.4029	-0.80	-2.0680	417	-6.40	0
FBgn0004611	FBtr0330673	1.3830	9	9	8	0.4405	-2.90	-0.6928	740	-8.90	0
FBgn0004629	FBtr0082980	0.5730	0	0	0	0.5278	NA	3.2670	36	NA	NA
FBgn0004635	FBtr0072694	0.1544	2	2	1	0.4252	-3.10	1.4916	341	-9.70	0
FBgn0004636	FBtr0072867	2.0700	0	0	0	0.4581	-0.50	0.5323	644	-6.00	0
FBgn0004638	FBtr0087694	4.9730	0	0	0	0.4213	-4.30	4.2987	254	-8.50	0
FBgn0004643	FBtr0070441	0.0319	0	0	0	0.4434	-4.10	0.3530	106	-3.80	0
FBgn0004644	FBtr0100506	0.3785	0	0	0	0.4182	-1.70	1.2929	385	-2.20	0
FBgn0004646	FBtr0071036	0.4935	3	3	1	0.4305	-2.70	2.5267	676	-12.60	0
FBgn0004647	FBtr0070507	3.1354	7	7	7	0.4311	-2.50	1.3671	798	-8.00	0
FBgn0004648	FBtr0344739	2.3841	0	0	0	0.4872	-2.50	1.4238	195	-4.00	0
FBgn0004649	FBtr0073898	2.2643	0	0	0	0.4364	-1.70	-1.7073	165	-9.60	0
FBgn0004650	FBtr0070207	0.1885	0	0	0	0.3607	-5.50	2.9423	61	-1.40	0
FBgn0004654	FBtr0331410	0.1037	0	0	0	0.4091	-3.90	2.1397	44	-3.90	0
FBgn0004655	FBtr0070430	1.1359	1	1	1	0.5668	-13.40	-2.7969	1018	-5.50	0
FBgn0004656	FBtr0071119	1.6561	3	3	3	0.4992	-1.40	2.4454	637	-5.30	1
FBgn0004657	FBtr0071105	2.8504	0	0	0	0.5528	-0.70	0.8964	199	-1.70	0
FBgn0004666	FBtr0082710	0.6151	0	0	0	0.4300	-1.80	2.5239	100	-9.60	0
FBgn0004687	FBtr0070783	2.4296	0	0	0	0.3500	-4.80	1.3373	120	-2.40	0
FBgn0004698	FBtr0087374	1.0466	2	2	2	0.4111	-0.60	1.1573	270	-2.00	0
FBgn0004777	FBtr0081689	1.8515	0	0	0	0.3913	-1.90	3.5023	46	-4.40	0
FBgn0004779	FBtr0081694	0.6477	0	0	0	0.4000	-1.60	2.3003	55	-5.20	0
FBgn0004780	FBtr0081690	0.6345	0	0	0	0.4394	-3.30	4.6558	66	-1.00	0
FBgn0004795	FBtr0072072	1.0552	5	5	4	0.4085	-8.80	-1.2808	568	-6.00	0
FBgn0004797	FBtr0080915	0.2522	0	0	0	0.4375	-7.50	2.7001	144	-6.50	0
FBgn0004811	FBtr0081316	3.9313	1	0	0	0.4476	-1.20	3.6965	105	-6.70	0
FBgn0004828	FBtr0071345	2.6792	0	0	0	0.3070	-1.40	3.1469	114	-1.30	0
FBgn0004832	FBtr0070670	0.1190	0	0	0	0.3462	-5.40	1.0930	78	-0.90	0
FBgn0004837	FBtr0346621	2.9606	3	3	3	0.4232	-3.10	-0.1022	449	-2.80	0
FBgn0004838	FBtr0301404	1.0077	0	0	0	0.4150	-2.50	2.0652	253	-2.10	0
FBgn0004839	FBtr0088028	0.3626	7	7	2	0.4667	-5.30	-1.6965	917	-3.30	0
FBgn0004855	FBtr0082925	2.8403	0	0	0	0.4651	-2.70	0.9463	43	-2.50	0
FBgn0004856	FBtr0071350	2.1571	0	0	0	0.3949	0.00	-0.9668	157	-3.60	0
FBgn0004858	FBtr0342915	0.3408	2	2	0	0.3890	-0.70	2.2412	1113	-6.00	0
FBgn0004859	FBtr0089178	1.1945	5	5	4	0.3089	-4.10	1.8220	463	-5.30	0
FBgn0004860	FBtr0070433	1.5517	3	3	3	0.2500	0.00	-0.1894	68	-4.00	0
FBgn0004861	FBtr0301515	0.3247	5	5	3	0.5544	-3.20	0.8276	1084	-5.30	0
FBgn0004862	FBtr0084087	0.5136	0	0	0	0.3926	-0.80	2.2121	135	-6.10	0
FBgn0004863	FBtr0084111	0.5552	0	0	0	0.4669	-11.70	3.6902	272	-4.60	0
FBgn0004864	FBtr0073457	1.9281	3	3	3	0.5236	-3.80	-3.4818	636	-5.30	0
FBgn0004865	FBtr0078307	0.0807	2	2	0	0.4346	-7.60	2.4154	573	-8.40	0
FBgn0004867	FBtr0079905	0.0321	0	0	0	0.4000	-3.40	4.2089	50	-1.90	0
FBgn0004868	FBtr0079862	0.6339	0	0	0	0.4309	-7.40	1.9632	181	-9.00	0
FBgn0004872	FBtr0340227	0.1536	0	0	0	0.3977	-2.90	2.9751	88	-2.10	0
FBgn0004875	FBtr0073152	0.2196	4	4	4	0.4340	-1.70	-1.2535	265	-2.40	0
FBgn0004876	FBtr0083716	0.2254	13	13	7	0.4400	-13.60	3.2488	1100	-5.30	0
FBgn0004878	FBtr0339518	0.1031	0	0	0	0.4404	-4.40	3.6965	193	-10.70	0
FBgn0004880	FBtr0073165	0.1565	7	3	2	0.4024	0.00	1.4746	1168	-5.70	0
FBgn0004882	FBtr0084384	0.0896	9	4	1	0.4835	-2.50	2.3474	908	0.00	0
FBgn0004885	FBtr0084690	0.3546	1	1	1	0.4482	-5.00	-0.0376	328	-10.30	0
FBgn0004888	FBtr0073151	0.3346	0	0	0	0.4074	-1.20	0.8790	108	-7.00	0
FBgn0004889	FBtr0082191	0.8340	2	2	2	0.4177	-6.00	3.1313	407	-8.40	0
FBgn0004892	FBtr0077558	0.3834	1	1	1	0.4034	-9.70	-4.5707	590	-1.40	0
FBgn0004893	FBtr0077491	0.2572	3	3	3	0.3920	-5.10	0.4028	352	-8.70	0
FBgn0004898	FBtr0084771	0.6035	0	0	0	0.3679	-7.20	0.9969	106	-0.30	0
FBgn0004901	FBtr0304705	0.0515	0	0	0	0.5054	-6.90	3.0384	93	-10.70	0
FBgn0004903	FBtr0100339	2.5433	1	1	1	0.3769	-3.70	3.6820	130	-5.90	0
FBgn0004907	FBtr0332917	5.2819	0	0	0	0.3975	0.00	4.0480	161	-3.90	0
FBgn0004908	FBtr0081838	1.8761	0	0	0	0.2785	-5.40	-1.0504	79	-0.40	0
FBgn0004913	FBtr0078837	0.3043	0	0	0	0.4130	-6.80	0.0719	92	-8.70	0
FBgn0004914	FBtr0079748	0.0336	0	0	0	0.2667	NA	3.2504	15	NA	NA
FBgn0004915	FBtr0080025	3.3861	0	0	0	0.3385	-5.70	0.4858	65	-10.10	0
FBgn0004919	FBtr0300178	0.3257	0	0	0	0.3763	-0.30	-0.7295	558	-6.20	0
FBgn0004921	FBtr0088646	2.1921	0	0	0	0.4385	-4.30	1.7074	301	-1.50	0
FBgn0004924	FBtr0074005	0.4515	0	0	0	0.4536	-3.20	3.2172	302	-6.70	0
FBgn0004926	FBtr0075968	1.2331	1	1	0	0.4219	-3.10	3.3004	128	-8.40	0
FBgn0004956	FBtr0112847	0.3070	1	1	0	0.4902	-8.40	-0.6379	461	-9.20	0
FBgn0004957	FBtr0310487	0.2465	0	0	0	0.4898	-7.30	-1.0084	98	-4.50	0
FBgn0004959	FBtr0342846	0.4104	0	0	0	0.5204	-0.60	-0.7077	196	-13.80	0
FBgn0005198	FBtr0074819	1.9743	0	0	0	0.5156	-3.00	1.9218	128	-4.10	0
FBgn0005278	FBtr0089432	1.4221	1	0	0	0.4613	0.00	2.9941	388	-3.10	0
FBgn0005322	FBtr0080065	1.6168	1	1	0	0.4595	-6.50	3.2212	111	-14.70	0
FBgn0005355	FBtr0082665	0.8276	1	1	1	0.4000	NA	1.4405	30	NA	NA
FBgn0005386	FBtr0306009	0.4167	5	5	5	0.4718	0.00	1.2092	390	-2.10	0
FBgn0005390	FBtr0070892	0.0257	0	0	0	0.3667	-6.80	2.1937	90	-3.70	0
FBgn0005411	FBtr0307178	1.1596	0	0	0	0.2901	-3.00	2.2003	162	-1.70	0
FBgn0005427	FBtr0308208	0.1892	6	5	2	0.4403	-5.90	4.2481	561	-8.00	0
FBgn0005533	FBtr0076479	0.0981	0	0	0	0.4167	-5.40	2.7676	60	-4.60	0
FBgn0005536	FBtr0308212	0.9467	3	3	3	0.4509	-15.00	2.5267	743	-6.10	0
FBgn0005558	FBtr0089236	0.3036	0	0	0	0.4358	-3.80	0.0804	514	-4.80	0
FBgn0005564	FBtr0074973	0.0823	2	2	1	0.4952	-2.90	-0.3080	622	-4.60	0
FBgn0005585	FBtr0082103	2.1318	0	0	0	0.4767	-7.30	-1.5762	86	-3.40	0
FBgn0005586	FBtr0088257	0.7990	0	0	0	0.4863	-1.90	2.8190	619	-5.10	0
FBgn0005590	FBtr0081261	4.8103	1	1	0	0.3913	-4.50	3.2959	46	-4.50	0
FBgn0005592	FBtr0075778	0.4245	4	2	2	0.4220	-9.10	0.9857	372	-4.40	0
FBgn0005593	FBtr0079946	0.0882	0	0	0	0.4286	-4.40	1.7108	49	-1.70	0
FBgn0005596	FBtr0085415	0.5381	4	3	1	0.5059	-2.60	0.5211	678	-6.60	1
FBgn0005612	FBtr0072158	0.2501	3	3	2	0.5205	-8.80	2.0335	317	-4.60	0
FBgn0005616	FBtr0077570	0.2571	2	2	1	0.5029	-6.90	1.7074	340	-7.80	0
FBgn0005617	FBtr0343118	0.5068	2	2	2	0.4480	-6.10	0.2194	375	-4.30	0
FBgn0005624	FBtr0345375	1.4876	7	7	4	0.4517	-1.50	0.0570	1005	-3.80	0
FBgn0005630	FBtr0089349	2.1880	0	0	0	0.4726	0.00	2.5755	402	-3.10	0
FBgn0005631	FBtr0071922	0.5129	1	1	1	0.4571	-2.10	1.4891	175	-6.90	0
FBgn0005632	FBtr0085843	3.1339	0	0	0	0.5164	-9.60	2.2924	457	-4.70	0
FBgn0005636	FBtr0330610	0.2066	0	0	0	0.6087	-10.80	-4.0352	69	-8.50	0
FBgn0005638	FBtr0072272	1.3177	2	2	2	0.4804	-2.40	1.5244	537	-6.60	0
FBgn0005640	FBtr0073132	1.3055	1	1	1	0.5035	-1.10	1.3668	429	-11.50	0
FBgn0005642	FBtr0085356	1.2998	2	2	2	0.5079	-8.10	-2.5887	252	-3.40	0
FBgn0005648	FBtr0088785	0.8187	1	1	0	0.3941	-2.20	1.9282	406	-6.50	0
FBgn0005649	FBtr0084592	3.2224	3	3	3	0.3923	-1.90	1.2496	915	-9.20	0
FBgn0005654	FBtr0087769	0.2470	0	0	0	0.4651	-4.30	0.0363	129	-4.10	0
FBgn0005655	FBtr0086308	2.0360	0	0	0	0.3483	0.00	1.7608	89	-8.20	0
FBgn0005666	FBtr0334483	0.4499	0	0	0	0.4429	-4.70	1.1472	140	-3.00	0
FBgn0005671	FBtr0301661	0.3117	0	0	0	0.4522	-6.30	2.7397	115	-6.90	0
FBgn0005672	FBtr0081267	0.5615	4	4	4	0.3900	-3.50	-0.9258	359	-3.50	0
FBgn0005674	FBtr0084511	0.6203	0	0	0	0.4340	-3.00	1.5679	106	-4.60	0
FBgn0005677	FBtr0100399	0.3858	0	0	0	0.4577	-0.90	-0.4677	627	-3.00	0
FBgn0005683	FBtr0333490	0.1741	2	2	2	0.3577	-5.30	0.4702	137	-3.70	0
FBgn0005694	FBtr0330156	0.4605	7	7	4	0.4463	-2.10	-3.1675	475	-9.30	0
FBgn0005695	FBtr0088710	0.1424	2	1	1	0.4087	-4.80	0.8525	230	-3.10	0
FBgn0005696	FBtr0114543	0.3595	0	0	0	0.4144	-1.80	-1.9888	111	-10.00	0
FBgn0005771	FBtr0342913	0.5697	0	0	0	0.4160	-3.60	-0.0943	387	-3.70	0
FBgn0005775	FBtr0073375	0.4629	0	0	0	0.4607	-7.40	0.3409	471	-4.00	0
FBgn0005777	FBtr0082129	0.7798	0	0	0	0.2131	0.00	2.5093	61	0.00	0
FBgn0008635	FBtr0074576	1.0511	0	0	0	0.4832	-5.10	1.8312	149	-6.00	0
FBgn0008636	FBtr0071556	0.7035	0	0	0	0.3975	-10.50	-1.0300	322	-8.60	0
FBgn0010014	FBtr0070764	1.2722	0	0	0	0.3905	-2.90	1.4916	169	-11.80	0
FBgn0010019	FBtr0070099	0.5531	0	0	0	0.4953	-1.80	2.2466	107	-13.50	0
FBgn0010038	FBtr0082569	0.4601	0	0	0	0.4074	NA	3.1752	27	NA	NA
FBgn0010039	FBtr0082570	0.1042	1	0	0	0.6129	-8.90	-3.5463	62	-8.00	0
FBgn0010041	FBtr0082572	0.2175	0	0	0	0.4194	NA	3.2511	31	NA	NA
FBgn0010051	FBtr0344265	0.5026	2	2	2	0.5194	-9.40	1.7765	1057	-6.60	0
FBgn0010053	FBtr0086625	1.0862	0	0	0	0.5294	NA	-0.7276	34	NA	NA
FBgn0010078	FBtr0071897	0.1213	0	0	0	0.4627	-4.00	4.0480	67	-6.40	0
FBgn0010097	FBtr0332572	1.4333	1	1	1	0.3784	-1.50	3.3394	74	-2.90	0
FBgn0010100	FBtr0081473	2.0733	0	0	0	0.4298	-10.40	1.2018	121	-9.10	0
FBgn0010105	FBtr0075579	0.4695	1	1	1	0.4336	0.00	2.7001	226	-4.60	0
FBgn0010109	FBtr0088803	1.1140	0	0	0	0.3652	-1.50	4.2089	282	-8.20	0
FBgn0010113	FBtr0085619	0.4393	5	4	3	0.3646	-1.60	-3.1933	1012	-6.20	0
FBgn0010173	FBtr0081867	0.5436	1	1	0	0.3580	-4.30	4.6558	81	-0.70	0
FBgn0010194	FBtr0343046	2.9772	6	6	6	0.3852	-1.40	0.6603	553	-5.30	0
FBgn0010198	FBtr0300828	0.1590	0	0	0	0.4348	-3.50	0.4975	69	-4.80	0
FBgn0010213	FBtr0345492	1.8793	0	0	0	0.3492	-3.40	-0.0036	126	-5.80	0
FBgn0010215	FBtr0070038	3.9019	0	0	0	0.3333	-1.70	-4.1328	54	-1.60	0
FBgn0010217	FBtr0089186	3.0314	0	0	0	0.3846	NA	3.3656	26	NA	NA
FBgn0010220	FBtr0088564	1.2646	0	0	0	0.3247	-1.80	2.2918	77	-5.40	0
FBgn0010222	FBtr0081997	0.8381	0	0	0	0.4105	-0.80	3.5964	95	-3.40	0
FBgn0010223	FBtr0075354	0.4459	0	0	0	0.4084	-3.30	1.9678	333	-6.50	0
FBgn0010225	FBtr0078968	1.6472	1	1	0	0.4577	-9.80	2.5252	319	-6.80	0
FBgn0010226	FBtr0087005	1.3691	0	0	0	0.4957	-5.40	1.3308	234	-4.80	0
FBgn0010228	FBtr0071673	0.6994	0	0	0	0.3933	0.00	1.7557	239	-5.70	0
FBgn0010235	FBtr0075951	2.2985	0	0	0	0.3361	-3.90	3.5878	119	-2.90	0
FBgn0010238	FBtr0087933	1.7505	0	0	0	0.4832	-7.80	1.1057	327	-6.30	0
FBgn0010246	FBtr0072672	0.4194	1	1	0	0.4854	-4.80	2.4838	309	-8.30	0
FBgn0010247	FBtr0113885	5.0962	1	1	1	0.2400	-2.40	0.5563	75	-1.40	0
FBgn0010263	FBtr0330213	2.1468	0	0	0	0.4248	-8.90	2.3831	605	-4.10	0
FBgn0010265	FBtr0100541	0.1523	0	0	0	0.3636	NA	3.4923	33	NA	NA
FBgn0010269	FBtr0071313	0.1584	0	0	0	0.4486	-4.30	1.1719	457	-6.30	0
FBgn0010278	FBtr0072242	1.0391	0	0	0	0.4326	-4.60	0.3546	141	-14.80	0
FBgn0010280	FBtr0075449	0.4898	4	4	2	0.5293	-2.00	1.8818	512	-11.20	1
FBgn0010282	FBtr0081719	1.0328	1	1	1	0.4031	0.00	0.2708	129	-3.40	0
FBgn0010287	FBtr0079542	2.6337	0	0	0	0.4211	-4.50	-0.4493	76	-3.30	0
FBgn0010288	FBtr0303459	2.1734	1	1	0	0.3438	-3.00	1.7328	128	-0.10	0
FBgn0010292	FBtr0071090	1.3208	0	0	0	0.3661	-0.50	4.2987	112	-2.00	0
FBgn0010300	FBtr0081158	2.3920	3	3	2	0.4349	-4.70	3.1171	837	-10.80	0
FBgn0010303	FBtr0073747	0.8129	5	4	0	0.4544	-2.90	0.4227	658	-7.10	0
FBgn0010309	FBtr0302561	0.0312	2	1	0	0.3488	-1.70	3.3212	86	-5.80	0
FBgn0010313	FBtr0345141	2.3620	5	5	4	0.4134	-2.40	1.6225	687	-6.60	0
FBgn0010314	FBtr0079799	0.9267	0	0	0	0.4452	-7.80	1.8075	292	-1.70	0
FBgn0010315	FBtr0300391	0.9596	4	4	3	0.4093	-6.30	0.9806	259	-4.90	0
FBgn0010316	FBtr0088469	0.1654	0	0	0	0.4297	-2.70	3.2014	619	-7.80	0
FBgn0010317	FBtr0073127	0.1105	0	0	0	0.3874	-3.70	1.8950	111	-2.00	0
FBgn0010323	FBtr0347398	0.2755	0	0	0	0.4286	-7.10	-3.9653	161	-2.60	0
FBgn0010328	FBtr0085178	3.3170	5	5	5	0.4658	-1.40	2.9202	380	-3.80	0
FBgn0010333	FBtr0072730	1.4968	0	0	0	0.5045	-3.70	0.5858	337	-5.70	0
FBgn0010339	FBtr0087976	2.0949	1	1	1	0.3920	-8.60	0.1681	125	-4.40	0
FBgn0010340	FBtr0337095	2.0081	0	0	0	0.3750	-0.30	3.5042	72	-7.40	0
FBgn0010341	FBtr0309214	0.9359	0	0	0	0.4684	-1.10	2.1922	158	-4.10	0
FBgn0010342	FBtr0088530	2.9260	0	0	0	0.4877	-10.50	2.0607	162	-4.30	0
FBgn0010348	FBtr0078571	5.6579	1	1	1	0.4310	0.00	0.8680	290	-3.70	0
FBgn0010350	FBtr0076688	1.1398	1	1	1	0.4927	-0.70	1.3330	205	-10.50	0
FBgn0010352	FBtr0075268	1.5658	0	0	0	0.3538	-4.20	3.2495	65	-6.50	0
FBgn0010355	FBtr0081684	1.9731	1	1	1	0.4356	-1.90	2.9020	101	-9.40	0
FBgn0010356	FBtr0088240	1.2952	0	0	0	0.3676	0.00	2.4987	68	-0.70	0
FBgn0010379	FBtr0083227	0.3586	2	1	0	0.4917	-3.50	1.3577	720	-1.10	0
FBgn0010380	FBtr0074789	0.9871	0	0	0	0.4505	-4.30	1.8312	111	-5.70	0
FBgn0010381	FBtr0073073	2.6538	0	0	0	0.3968	-1.60	1.9632	63	-1.20	0
FBgn0010382	FBtr0080774	1.5992	2	2	1	0.4742	-10.90	0.4761	426	-3.70	0
FBgn0010383	FBtr0074610	0.3779	0	0	0	0.4976	-8.10	0.6655	824	-9.30	0
FBgn0010387	FBtr0076916	1.1729	0	0	0	0.3448	NA	1.8234	29	NA	NA
FBgn0010389	FBtr0083550	0.6095	4	4	3	0.4765	-4.00	3.5023	787	-2.50	0
FBgn0010391	FBtr0073480	0.1834	2	2	0	0.4779	-6.60	2.2848	113	-6.60	0
FBgn0010395	FBtr0346711	1.0619	0	0	0	0.3960	-3.80	2.5093	101	-7.30	0
FBgn0010397	FBtr0087512	1.6954	0	0	0	0.3630	-1.10	3.3149	146	-4.70	0
FBgn0010398	FBtr0080092	0.0651	0	0	0	0.3846	-5.50	0.5695	91	-7.30	0
FBgn0010406	FBtr0076752	2.0288	0	0	0	0.3086	-0.80	3.6466	81	-4.50	0
FBgn0010407	FBtr0079978	0.4116	1	1	1	0.3145	-3.50	2.0293	124	-1.40	0
FBgn0010408	FBtr0342577	0.0637	0	0	0	0.5556	NA	1.9157	27	NA	NA
FBgn0010409	FBtr0086947	0.1215	0	0	0	0.5000	NA	3.2008	36	NA	NA
FBgn0010411	FBtr0086274	0.2595	0	0	0	0.3684	NA	3.3592	38	NA	NA
FBgn0010412	FBtr0074311	0.1667	0	0	0	0.3529	NA	1.8006	34	NA	NA
FBgn0010415	FBtr0273206	3.4490	1	1	1	0.3988	-1.70	2.1678	336	-6.80	0
FBgn0010416	FBtr0340315	1.5850	2	2	2	0.1786	-2.00	3.8492	84	-0.50	0
FBgn0010417	FBtr0074941	0.5789	0	0	0	0.4444	-3.30	0.7737	72	-13.40	0
FBgn0010421	FBtr0082310	2.9501	0	0	0	0.3524	-3.30	1.9938	105	-1.30	0
FBgn0010422	FBtr0080722	2.0644	1	1	1	0.4556	-3.60	3.9187	259	-6.10	0
FBgn0010423	FBtr0345540	0.4683	0	0	0	0.4259	-5.50	2.8533	54	-6.60	0
FBgn0010424	FBtr0089585	0.4146	0	0	0	0.4742	-0.70	3.2670	97	-8.60	0
FBgn0010431	FBtr0076613	0.2662	0	0	0	0.3810	-3.20	4.2307	63	-3.90	0
FBgn0010433	FBtr0081828	1.1411	0	0	0	0.5270	-0.80	3.0384	74	-5.60	0
FBgn0010434	FBtr0086509	0.3949	0	0	0	0.4501	-5.30	2.1097	371	-4.30	0
FBgn0010435	FBtr0072402	0.4277	0	0	0	0.5203	-1.80	3.2425	246	-8.00	0
FBgn0010438	FBtr0083277	0.3010	0	0	0	0.2143	NA	2.5330	14	NA	NA
FBgn0010441	FBtr0085179	2.4540	1	1	1	0.5289	-4.50	2.0335	225	-3.00	0
FBgn0010452	FBtr0075890	0.3486	4	4	1	0.3692	0.00	1.7547	585	-6.00	0
FBgn0010453	FBtr0334799	0.1790	8	4	1	0.4139	0.00	1.9340	1162	-10.70	0
FBgn0010470	FBtr0071703	1.2145	0	0	0	0.5906	-7.80	0.6679	149	-9.50	0
FBgn0010473	FBtr0333485	0.2516	3	3	3	0.4948	-3.90	-0.2115	483	-6.30	0
FBgn0010488	FBtr0087786	0.8762	6	6	6	0.5517	-8.90	-4.2549	2184	-6.20	1
FBgn0010497	FBtr0080292	0.0509	0	0	0	0.4797	-5.00	1.7582	344	-5.20	0
FBgn0010501	FBtr0072062	1.2848	0	0	0	0.4951	-0.80	2.0537	410	-10.00	0
FBgn0010504	FBtr0088811	1.0545	3	2	1	0.5056	-4.80	0.3573	712	-14.60	0
FBgn0010516	FBtr0088082	2.2557	0	0	0	0.4079	-0.20	3.6746	76	-8.10	0
FBgn0010520	FBtr0079874	1.1241	0	0	0	0.3516	-2.80	1.5744	91	-0.50	0
FBgn0010531	FBtr0300944	0.1268	0	0	0	0.3400	-2.10	3.9512	50	-4.70	0
FBgn0010548	FBtr0088993	1.7073	2	2	1	0.4655	-1.60	2.1703	391	-3.40	0
FBgn0010551	FBtr0112862	0.6299	0	0	0	0.4571	-0.20	3.4424	70	-7.00	0
FBgn0010575	FBtr0301551	1.6486	2	2	2	0.3757	-4.50	-0.6292	181	-2.40	0
FBgn0010583	FBtr0332973	0.6000	4	4	2	0.4974	-8.10	-1.1635	770	-12.50	0
FBgn0010590	FBtr0087262	3.1729	0	0	0	0.3187	-3.70	1.7565	91	-3.50	0
FBgn0010591	FBtr0087007	0.3041	2	2	1	0.4625	-7.20	0.8070	160	-5.80	0
FBgn0010602	FBtr0078081	2.0322	0	0	0	0.5079	-7.80	1.0254	254	-4.50	0
FBgn0010607	FBtr0079050	3.1697	0	0	0	0.3810	-3.00	2.0339	189	-4.20	0
FBgn0010611	FBtr0087149	0.1155	0	0	0	0.3750	NA	1.7137	40	NA	0
FBgn0010612	FBtr0110872	2.5946	0	0	0	0.3774	-5.00	2.6857	53	-5.00	0
FBgn0010620	FBtr0086909	1.1814	2	2	0	0.4050	-6.40	2.5528	442	-5.40	0
FBgn0010621	FBtr0087987	0.7151	0	0	0	0.3866	-3.00	2.2750	119	-7.60	0
FBgn0010622	FBtr0336732	1.6649	0	0	0	0.3614	0.00	3.1714	83	-3.70	0
FBgn0010638	FBtr0087498	0.5817	0	0	0	0.4961	-5.10	2.9182	129	-4.90	0
FBgn0010651	FBtr0086635	0.3722	2	1	0	0.4543	-0.60	-0.5722	339	-6.10	0
FBgn0010660	FBtr0071996	1.8156	0	0	0	0.4432	-3.60	4.2544	88	-5.50	0
FBgn0010741	FBtr0332708	1.4562	0	0	0	0.4366	-7.00	0.6185	142	-5.60	0
FBgn0010747	FBtr0077169	2.4779	0	0	0	0.5119	-2.40	2.7537	168	-6.00	0
FBgn0010750	FBtr0078868	0.6665	1	1	1	0.4653	-3.90	2.3411	101	-7.70	0
FBgn0010762	FBtr0076263	1.2343	4	4	3	0.4256	-4.00	2.8281	672	-2.00	0
FBgn0010768	FBtr0083733	0.1054	0	0	0	0.5167	-10.20	-4.7341	896	-4.00	0
FBgn0010770	FBtr0084012	2.3077	0	0	0	0.4200	-1.20	2.8241	50	-5.40	0
FBgn0010772	FBtr0078728	0.6081	3	3	2	0.4300	-4.10	3.9293	507	0.00	0
FBgn0010774	FBtr0081642	3.9311	0	0	0	0.4045	-1.20	3.1352	178	-4.60	0
FBgn0010786	FBtr0072679	0.0368	1	1	0	0.4233	-4.00	0.0759	352	-3.80	0
FBgn0010803	FBtr0081981	0.5258	2	2	0	0.3982	-6.30	2.1703	113	-7.10	0
FBgn0010808	FBtr0085745	0.8175	0	0	0	0.4545	-3.80	2.6938	121	-8.20	0
FBgn0010812	FBtr0081788	0.4814	0	0	0	0.4385	-4.30	1.9433	244	-9.30	0
FBgn0010825	FBtr0305697	1.7361	3	3	3	0.4692	-4.00	-1.5017	959	-3.00	0
FBgn0010830	FBtr0078535	0.0912	2	0	0	0.5094	-5.90	-0.4451	212	-9.50	0
FBgn0010877	FBtr0083595	0.6691	5	3	0	0.4534	-6.30	-0.2669	761	-5.00	0
FBgn0010894	FBtr0077136	0.6376	0	0	0	0.4660	-5.00	-0.6984	103	-5.20	0
FBgn0010905	FBtr0304618	2.1783	6	6	6	0.4410	-4.10	1.3428	669	-6.30	0
FBgn0010909	FBtr0072959	1.6251	1	1	1	0.4576	-0.30	4.6558	177	-10.10	0
FBgn0010926	FBtr0083504	0.9692	1	1	1	0.4100	-4.40	3.3067	100	-11.00	0
FBgn0011016	FBtr0075453	0.3444	0	0	0	0.4639	-1.20	3.6509	97	-4.90	0
FBgn0011020	FBtr0081569	0.4240	0	0	0	0.3415	NA	0.5149	41	NA	0
FBgn0011202	FBtr0305961	2.5869	0	0	0	0.4710	-5.10	2.2681	138	-3.30	0
FBgn0011204	FBtr0072706	0.3159	0	0	0	0.4981	-10.50	2.1668	265	-4.20	0
FBgn0011205	FBtr0078186	3.5440	2	2	2	0.5182	-7.30	1.3886	384	-2.80	0
FBgn0011206	FBtr0076541	1.0280	1	1	1	0.4697	-5.60	0.3715	628	-6.30	0
FBgn0011207	FBtr0079847	0.0782	2	0	0	0.5350	-1.70	-0.7012	243	-2.30	0
FBgn0011211	FBtr0071883	1.4429	0	0	0	0.4381	-1.10	3.3256	105	-6.10	0
FBgn0011217	FBtr0310554	4.5669	0	0	0	0.4433	-0.60	2.4339	388	-3.20	0
FBgn0011224	FBtr0300264	2.2278	0	0	0	0.4239	-4.10	0.8724	394	-5.90	0
FBgn0011225	FBtr0084636	0.2977	0	0	0	0.5545	-7.50	2.9887	101	-12.10	0
FBgn0011227	FBtr0087861	4.5762	0	0	0	0.4100	-0.84	3.2164	100	-5.60	0
FBgn0011230	FBtr0079545	1.5121	0	0	0	0.3966	-1.80	1.8581	58	-9.60	0
FBgn0011232	FBtr0079809	0.1085	4	4	0	0.4725	-6.40	-2.6607	309	-2.10	0
FBgn0011236	FBtr0072129	0.0853	4	3	1	0.4341	-3.80	-1.2075	599	-8.50	0
FBgn0011241	FBtr0088453	1.6233	1	1	0	0.3333	-1.00	3.8950	93	-3.00	0
FBgn0011259	FBtr0303879	1.8077	10	10	10	0.3732	-2.00	2.3441	1396	-7.80	0
FBgn0011260	FBtr0345339	3.3750	1	1	0	0.4684	-6.70	1.0433	237	-2.70	0
FBgn0011272	FBtr0100164	0.1327	0	0	0	0.4043	-4.00	3.0846	47	-5.30	0
FBgn0011284	FBtr0075884	0.0790	0	0	0	0.5268	-7.20	3.1550	112	-6.80	0
FBgn0011286	FBtr0304572	0.1953	0	0	0	0.4565	-13.10	3.2274	184	-7.70	0
FBgn0011289	FBtr0085155	2.2914	0	0	0	0.5291	-7.00	0.8610	172	-12.40	0
FBgn0011290	FBtr0082440	1.7551	0	0	0	0.4110	0.00	1.3703	309	-8.20	0
FBgn0011291	FBtr0079924	1.3785	1	1	0	0.3523	-1.30	-0.3952	88	-6.30	0
FBgn0011296	FBtr0072100	1.2734	0	0	0	0.4412	-2.50	2.5093	68	-5.60	0
FBgn0011297	FBtr0072095	0.6315	0	0	0	0.3797	-0.50	2.8759	79	-6.70	0
FBgn0011300	FBtr0088659	0.2003	4	0	0	0.5371	-12.80	2.9878	633	-4.40	0
FBgn0011305	FBtr0080079	1.6996	0	0	0	0.3824	-3.00	-0.4789	136	-2.50	0
FBgn0011327	FBtr0076472	3.3244	0	0	0	0.3729	-4.20	2.5481	118	-9.70	0
FBgn0011335	FBtr0075991	2.4228	0	0	0	0.3740	-6.00	0.4297	131	-8.40	0
FBgn0011336	FBtr0084786	0.8212	1	1	1	0.4096	-5.40	0.0714	83	-9.20	0
FBgn0011361	FBtr0072676	1.9917	0	0	0	0.4312	-2.40	1.5297	109	-3.80	0
FBgn0011455	FBtr0334094	1.7348	0	0	0	0.4306	-1.50	2.7889	72	-5.20	0
FBgn0011474	FBtr0082929	2.8124	4	4	4	0.4651	-2.70	-1.1217	301	-5.50	0
FBgn0011476	FBtr0334696	1.4603	3	3	3	0.3782	-1.20	1.0336	119	-6.00	0
FBgn0011481	FBtr0083611	1.2438	11	10	8	0.4131	0.00	4.0480	1501	-4.10	0
FBgn0011509	FBtr0333891	1.3748	1	1	0	0.4390	-3.60	2.8696	82	-12.50	0
FBgn0011566	FBtr0070447	0.0533	2	0	0	0.4163	-10.10	2.9202	209	-4.80	0
FBgn0011570	FBtr0077881	1.6063	0	0	0	0.3952	-0.70	4.0717	210	-8.80	0
FBgn0011571	FBtr0074217	3.5811	0	0	0	0.3404	0.00	3.1812	141	-3.60	0
FBgn0011573	FBtr0072777	0.7656	0	0	0	0.3961	0.00	4.2987	308	-6.20	0
FBgn0011576	FBtr0070387	0.0629	0	0	0	0.5625	NA	1.6633	16	NA	NA
FBgn0011584	FBtr0343741	1.6042	2	2	2	0.3917	-1.50	2.2310	120	-5.30	0
FBgn0011586	FBtr0071266	3.6968	0	0	0	0.4000	0.00	2.4716	230	-0.70	0
FBgn0011591	FBtr0078267	0.2198	0	0	0	0.4313	-7.90	-3.1309	211	-5.60	0
FBgn0011592	FBtr0087822	1.9644	9	9	9	0.4288	-3.50	0.4939	674	-5.50	0
FBgn0011604	FBtr0087842	2.6624	0	0	0	0.4277	0.00	1.3750	166	-7.80	0
FBgn0011606	FBtr0340093	0.6347	1	1	0	0.4330	-5.00	1.0830	224	-4.40	0
FBgn0011638	FBtr0081374	1.4344	0	0	0	0.4091	-3.60	2.8427	88	-5.90	0
FBgn0011640	FBtr0076841	2.3621	0	0	0	0.4986	-17.00	0.2839	355	-4.30	0
FBgn0011642	FBtr0089210	2.6570	2	2	2	0.2885	-5.70	-1.3192	208	-6.50	0
FBgn0011648	FBtr0077616	2.7120	4	4	4	0.4635	-1.60	2.5518	356	-5.80	0
FBgn0011653	FBtr0073260	0.2707	1	1	1	0.3967	-4.20	-1.5663	184	-7.50	0
FBgn0011655	FBtr0085815	0.5926	4	4	3	0.5354	-13.30	-1.2817	635	-7.90	0
FBgn0011656	FBtr0330708	0.3516	7	4	1	0.4903	-7.50	-0.1360	1134	-7.10	0
FBgn0011659	FBtr0088790	0.1560	0	0	0	0.6316	NA	0.8727	19	NA	NA
FBgn0011660	FBtr0087388	1.0951	0	0	0	0.3947	-9.50	-0.0819	76	-1.80	0
FBgn0011661	FBtr0071274	1.9202	1	1	1	0.3516	-4.80	4.0480	256	-6.40	0
FBgn0011666	FBtr0084882	0.3532	1	1	0	0.3517	-2.90	0.0960	489	-2.30	0
FBgn0011672	FBtr0301478	0.2126	1	1	0	0.4638	-4.50	2.6414	373	-9.10	0
FBgn0011674	FBtr0071562	0.1210	1	1	1	0.4765	-3.60	-0.3943	361	-6.00	0
FBgn0011692	FBtr0073227	1.5053	0	0	0	0.4306	-2.70	3.1927	144	-11.50	0
FBgn0011695	FBtr0072164	0.7502	0	0	0	0.5000	-1.20	2.7397	82	-5.40	0
FBgn0011701	FBtr0083564	0.2605	0	0	0	0.3967	-5.80	0.8246	305	-8.10	0
FBgn0011703	FBtr0080059	2.0970	0	0	0	0.4154	-0.90	2.5528	65	-6.70	0
FBgn0011704	FBtr0088046	2.3000	0	0	0	0.3858	-0.10	-0.5861	127	0.00	0
FBgn0011705	FBtr0079782	0.3633	0	0	0	0.3724	0.00	1.4958	145	-6.00	0
FBgn0011706	FBtr0075120	0.8522	0	0	0	0.3900	-2.10	2.5784	200	-1.20	0
FBgn0011708	FBtr0080831	1.1508	2	2	1	0.4344	-2.50	-0.3008	221	-0.10	0
FBgn0011710	FBtr0077198	3.7625	0	0	0	0.4333	-2.10	2.8533	90	-6.40	0
FBgn0011715	FBtr0078682	1.9483	1	1	1	0.4436	-1.70	3.1752	133	-7.00	0
FBgn0011722	FBtr0343152	0.6226	0	0	0	0.4639	-7.90	0.3068	194	-12.90	0
FBgn0011723	FBtr0332070	0.9031	0	0	0	0.4286	-13.90	0.4324	336	-5.50	0
FBgn0011725	FBtr0084566	4.3938	1	1	1	0.3889	-6.70	-1.2389	198	-1.60	0
FBgn0011726	FBtr0072188	2.4203	0	0	0	0.3942	-2.70	3.5420	137	-7.20	0
FBgn0011737	FBtr0079371	2.3645	0	0	0	0.3934	-6.90	2.9489	211	-5.00	0
FBgn0011739	FBtr0085720	0.1274	19	13	2	0.4282	-8.90	0.7987	1135	-7.20	0
FBgn0011740	FBtr0334302	1.1717	1	1	1	0.4178	-2.90	1.5687	146	-3.20	0
FBgn0011741	FBtr0074203	0.3365	1	1	1	0.3908	-4.90	1.0131	87	-10.10	0
FBgn0011742	FBtr0310673	0.4184	2	2	0	0.4536	-3.50	1.1009	560	-5.10	0
FBgn0011745	FBtr0082652	0.5452	0	0	0	0.3544	-0.30	3.8539	79	-6.30	0
FBgn0011747	FBtr0089173	4.5617	0	0	0	0.1538	NA	-0.2741	26	NA	NA
FBgn0011754	FBtr0343648	0.0724	1	1	0	0.4834	-11.50	-2.0511	511	-5.50	0
FBgn0011760	FBtr0070706	5.7937	0	0	0	0.4233	-0.30	3.6902	215	-4.00	0
FBgn0011761	FBtr0070749	1.1243	0	0	0	0.3774	-2.20	4.2806	106	-2.90	0
FBgn0011762	FBtr0076603	2.8300	0	0	0	0.3385	-2.70	1.5390	195	-5.10	0
FBgn0011763	FBtr0087740	1.9987	3	3	1	0.5367	-5.90	3.1714	613	-9.90	0
FBgn0011764	FBtr0339766	3.3275	0	0	0	0.4132	-7.10	-0.9025	121	-2.60	0
FBgn0011766	FBtr0084117	0.1422	3	1	0	0.4501	-8.50	2.3622	531	-4.90	0
FBgn0011768	FBtr0082290	0.6514	0	0	0	0.4340	-1.80	2.1514	106	0.00	0
FBgn0011769	FBtr0076498	0.2392	0	0	0	0.4750	NA	3.6728	40	NA	0
FBgn0011770	FBtr0071472	1.0530	0	0	0	0.4636	-9.20	0.9632	110	-2.60	0
FBgn0011771	FBtr0078510	1.8012	1	1	1	0.4952	-4.20	-0.5059	208	-1.40	0
FBgn0011774	FBtr0082385	0.7405	0	0	0	0.4396	-8.50	1.3789	91	-4.40	0
FBgn0011785	FBtr0084604	1.3301	2	2	2	0.4174	-6.30	1.6880	115	-9.00	0
FBgn0011787	FBtr0076511	0.9052	0	0	0	0.4400	-0.10	1.0777	100	-9.60	0
FBgn0011802	FBtr0076292	1.9042	0	0	0	0.3200	-5.00	2.1681	75	-1.20	0
FBgn0011817	FBtr0076758	1.3724	6	6	4	0.4668	-5.00	-1.3967	1054	-5.80	0
FBgn0011818	FBtr0077779	0.9012	0	0	0	0.4000	-5.20	2.0239	75	-4.20	0
FBgn0011824	FBtr0071639	0.5838	0	0	0	0.3378	-5.80	2.8388	74	-7.60	0
FBgn0011826	FBtr0074294	0.1758	1	1	1	0.5057	-0.10	1.6731	609	0.00	0
FBgn0011828	FBtr0072954	0.3558	0	0	0	0.5082	-4.10	1.5658	61	-14.00	0
FBgn0011829	FBtr0081494	0.2063	2	2	2	0.3929	-1.70	2.5422	336	-10.20	0
FBgn0011836	FBtr0076361	1.1414	0	0	0	0.3684	-5.30	0.0604	114	-5.00	0
FBgn0011837	FBtr0073683	3.2900	1	1	1	0.3594	-0.50	4.0480	384	-7.80	0
FBgn0012034	FBtr0333126	0.3903	2	0	0	0.3776	0.00	3.6466	196	-3.80	0
FBgn0012036	FBtr0332597	0.9909	0	0	0	0.4163	-2.60	3.2994	209	-8.00	0
FBgn0012037	FBtr0080552	0.3451	0	0	0	0.5158	-6.90	3.6241	95	-6.70	0
FBgn0012051	FBtr0112869	0.6766	0	0	0	0.4453	-5.00	1.8142	137	-5.40	0
FBgn0012058	FBtr0333369	0.4860	6	6	3	0.4689	-2.30	1.0921	659	-12.60	0
FBgn0013263	FBtr0075708	1.3891	0	0	0	0.4831	-4.00	-4.3627	356	-6.30	0
FBgn0013269	FBtr0083120	1.8251	0	0	0	0.4000	-2.70	2.1802	105	-3.90	0
FBgn0013272	FBtr0071813	0.6953	0	0	0	0.4405	-5.50	2.5493	168	-7.50	0
FBgn0013303	FBtr0074902	1.9549	4	4	4	0.3607	-1.60	2.9489	244	-1.20	0
FBgn0013305	FBtr0089876	0.9606	0	0	0	0.3023	0.00	1.9659	129	-4.50	0
FBgn0013325	FBtr0086533	0.1447	0	0	0	0.4545	-6.00	3.7057	77	-2.70	0
FBgn0013334	FBtr0083204	2.5113	3	3	2	0.4767	-1.90	2.9878	1007	-10.00	1
FBgn0013342	FBtr0072815	0.3892	0	0	0	0.5458	0.00	0.9186	480	-6.90	0
FBgn0013343	FBtr0084588	2.8305	5	4	3	0.4288	-0.70	2.7615	1320	-5.40	0
FBgn0013347	FBtr0084526	4.8467	0	0	0	0.4095	-6.00	0.8262	105	-4.00	0
FBgn0013432	FBtr0070431	1.4026	0	0	0	0.4880	-3.60	0.8540	166	-8.80	0
FBgn0013433	FBtr0343728	0.3609	2	2	1	0.4395	0.00	2.6370	769	-6.20	0
FBgn0013435	FBtr0088429	1.1303	1	1	1	0.2353	-1.40	0.0580	68	-3.40	0
FBgn0013469	FBtr0345346	0.2818	2	2	0	0.4562	-5.20	-2.0590	1061	-12.40	0
FBgn0013531	FBtr0079544	2.8776	0	0	0	0.3448	-0.50	0.9697	87	-5.00	0
FBgn0013548	FBtr0072085	0.6169	1	1	1	0.4620	-4.70	2.6483	158	-3.70	0
FBgn0013563	FBtr0075777	0.0788	1	1	0	0.4342	-5.80	0.5976	76	-2.00	0
FBgn0013576	FBtr0333695	0.6879	1	1	1	0.4798	-9.70	0.5429	173	-7.50	0
FBgn0013672	FBtr0100867	0.0390	0	0	0	NA	NA	NA		NA	NA
FBgn0013673	FBtr0100866	0.0000	0	0	0	NA	NA	NA		NA	NA
FBgn0013674	FBtr0100861	0.0118	0	0	0	NA	NA	NA		NA	NA
FBgn0013675	FBtr0100863	0.0191	0	0	0	NA	NA	NA		NA	NA
FBgn0013676	FBtr0100868	0.0293	0	0	0	NA	NA	NA		NA	NA
FBgn0013678	FBtr0100884	0.0199	0	0	0	NA	NA	NA		NA	NA
FBgn0013679	FBtr0100886	0.0061	0	0	0	NA	NA	NA		NA	NA
FBgn0013680	FBtr0100857	0.0176	0	0	0	NA	NA	NA		NA	NA
FBgn0013681	FBtr0100870	0.0566	0	0	0	NA	NA	NA		NA	NA
FBgn0013683	FBtr0100880	0.0028	0	0	0	NA	NA	NA		NA	NA
FBgn0013684	FBtr0100877	0.0170	0	0	0	NA	NA	NA		NA	NA
FBgn0013685	FBtr0100883	0.0232	0	0	0	NA	NA	NA		NA	NA
FBgn0013717	FBtr0290259	0.9449	4	4	4	0.5408	-12.20	-0.2291	638	-11.90	0
FBgn0013718	FBtr0100040	1.9999	4	4	4	0.3922	-3.80	2.8000	742	-8.80	0
FBgn0013720	FBtr0070256	1.6976	0	0	0	0.5182	-8.30	0.5829	137	-5.20	0
FBgn0013725	FBtr0087516	0.3664	0	0	0	0.5369	-11.90	0.4725	244	-9.20	0
FBgn0013726	FBtr0088793	2.1429	1	1	1	0.4755	-6.20	-1.4163	204	-6.40	0
FBgn0013732	FBtr0336663	2.4949	1	1	1	0.4785	-0.30	2.7141	186	-3.80	0
FBgn0013733	FBtr0304851	0.2876	0	0	0	0.4481	-2.00	0.8433	241	-11.50	0
FBgn0013746	FBtr0343095	3.1852	0	0	0	0.3276	-1.70	1.5833	116	-6.40	0
FBgn0013749	FBtr0089192	7.0750	0	0	0	0.2857	-2.10	3.1812	98	-1.90	0
FBgn0013750	FBtr0087378	0.4415	5	2	2	0.4855	-4.90	2.6724	276	-6.80	0
FBgn0013751	FBtr0330071	0.0876	1	1	0	0.4496	-5.10	2.9210	536	-5.90	0
FBgn0013753	FBtr0072758	3.4517	0	0	0	0.4577	-6.00	2.5395	284	-5.30	0
FBgn0013755	FBtr0072760	2.9975	0	0	0	0.3056	NA	0.8433	36	NA	NA
FBgn0013756	FBtr0332464	3.9414	0	0	0	0.3741	-5.40	2.1258	139	-5.00	0
FBgn0013759	FBtr0084161	0.3564	5	4	4	0.4333	-3.60	3.9293	510	-2.70	0
FBgn0013762	FBtr0087350	0.7025	0	0	0	0.4261	0.00	3.3394	115	-10.40	0
FBgn0013763	FBtr0087111	2.4372	0	0	0	0.4783	-3.60	2.3644	69	-5.40	0
FBgn0013764	FBtr0072191	1.2980	4	4	4	0.4038	-3.30	-0.2100	156	-6.40	0
FBgn0013765	FBtr0087703	2.1912	0	0	0	0.3846	-2.50	-2.5674	117	-6.70	0
FBgn0013770	FBtr0087593	3.7227	0	0	0	0.5385	NA	-0.6075	13	NA	NA
FBgn0013773	FBtr0087450	0.1626	1	0	0	0.4783	-4.40	-1.3726	115	-8.60	0
FBgn0013799	FBtr0074882	1.4305	6	6	5	0.4127	-1.90	0.3366	361	-5.40	0
FBgn0013813	FBtr0337034	0.3169	1	1	1	0.4375	-4.90	1.6898	96	-5.30	0
FBgn0013949	FBtr0084709	0.1356	0	0	0	0.5000	NA	0.6616	20	NA	NA
FBgn0013953	FBtr0084703	0.2834	0	0	0	0.4890	-3.90	2.0094	227	-10.90	0
FBgn0013954	FBtr0086515	4.1107	0	0	0	0.4375	-2.60	3.2773	80	-5.30	0
FBgn0013981	FBtr0334029	3.4945	0	0	0	0.3654	-2.30	1.8185	52	-4.30	0
FBgn0013983	FBtr0086725	0.4368	0	0	0	0.4590	-3.10	0.9843	122	-1.60	0
FBgn0013984	FBtr0290230	1.8682	12	12	7	0.4249	-1.90	1.0487	1118	-12.00	0
FBgn0013987	FBtr0308577	3.2851	0	0	0	0.4400	NA	1.2191	25	NA	NA
FBgn0013995	FBtr0309202	0.0500	2	1	0	0.4773	-3.80	-0.4618	616	-10.00	0
FBgn0013997	FBtr0075999	0.6839	1	1	1	0.4256	-1.50	2.7397	336	-11.20	0
FBgn0014000	FBtr0081306	0.2485	0	0	0	0.5161	NA	0.1223	31	NA	NA
FBgn0014002	FBtr0075648	1.8365	0	0	0	0.4676	-1.10	1.2456	139	-7.50	0
FBgn0014006	FBtr0300256	0.3365	3	3	2	0.4585	-5.90	0.7884	205	-0.70	0
FBgn0014007	FBtr0075913	4.8610	1	1	1	0.3750	-3.80	0.4738	208	-4.50	0
FBgn0014009	FBtr0336658	3.5202	0	0	0	0.4345	-3.00	2.5734	145	-13.30	0
FBgn0014010	FBtr0077797	1.1511	0	0	0	0.4591	-2.60	-0.0831	257	-8.40	0
FBgn0014011	FBtr0332800	1.3945	3	3	1	0.4044	-3.60	0.7587	680	-7.50	0
FBgn0014018	FBtr0089341	1.5304	1	1	1	0.4554	-11.20	2.6569	101	-9.00	0
FBgn0014020	FBtr0087211	2.1895	1	1	0	0.3801	-3.70	-2.1683	271	-12.90	0
FBgn0014022	FBtr0082062	2.1622	0	0	0	0.3889	NA	1.8495	36	NA	NA
FBgn0014023	FBtr0082121	0.3701	0	0	0	0.3571	-6.70	3.2912	42	-6.70	0
FBgn0014024	FBtr0340477	0.2668	0	0	0	0.3902	-9.40	0.7699	82	-8.30	0
FBgn0014026	FBtr0343329	0.0923	0	0	0	0.4118	-4.10	2.8388	85	-7.30	0
FBgn0014028	FBtr0086156	0.8029	0	0	0	0.4264	-6.10	2.6517	129	-7.80	0
FBgn0014029	FBtr0083945	2.5976	0	0	0	0.4706	-1.30	1.9237	85	-6.60	0
FBgn0014031	FBtr0070913	0.3220	0	0	0	0.4821	-3.20	1.5597	168	-9.50	0
FBgn0014032	FBtr0071241	1.0134	0	0	0	0.4470	-4.20	1.3322	132	-8.30	0
FBgn0014033	FBtr0346582	0.8833	0	0	0	0.4138	-3.20	0.4689	58	-2.60	0
FBgn0014037	FBtr0074920	0.9317	3	3	3	0.4371	-7.10	-1.6325	993	-10.20	0
FBgn0014075	FBtr0075064	1.3951	1	1	1	0.4089	-6.50	1.6649	203	-5.50	0
FBgn0014092	FBtr0080834	1.1960	0	0	0	0.4091	-3.10	-0.9134	88	-6.40	0
FBgn0014127	FBtr0081348	2.3200	0	0	0	0.3333	-2.50	2.3407	150	-6.10	0
FBgn0014133	FBtr0073526	2.6438	3	3	3	0.4863	-4.10	0.6588	329	-4.70	0
FBgn0014135	FBtr0083795	0.1341	10	10	3	0.4063	-5.40	-4.7797	1110	-8.80	0
FBgn0014141	FBtr0089473	1.0065	1	1	0	0.4256	-6.20	1.2608	195	-6.40	0
FBgn0014143	FBtr0078395	0.6346	0	0	0	0.4035	-8.80	0.2839	285	-6.10	0
FBgn0014163	FBtr0100477	1.9397	1	1	0	0.4563	0.00	3.2773	366	-5.20	0
FBgn0014179	FBtr0079855	0.8272	0	0	0	0.4379	-2.30	3.8573	153	-7.40	0
FBgn0014184	FBtr0088013	1.0538	0	0	0	0.3716	-3.20	1.8950	148	-1.30	0
FBgn0014189	FBtr0079125	2.6941	0	0	0	0.3896	-2.30	2.4943	77	-4.10	0
FBgn0014269	FBtr0086601	2.6862	0	0	0	0.4960	-4.30	-2.3307	125	-7.60	0
FBgn0014340	FBtr0070829	2.4268	0	0	0	0.3762	-5.60	0.9164	101	-4.10	0
FBgn0014342	FBtr0300009	1.1377	0	0	0	0.4167	NA	3.6902	12	NA	NA
FBgn0014343	FBtr0075911	0.4367	0	0	0	0.4562	-5.20	-1.1716	673	-4.30	0
FBgn0014366	FBtr0078751	2.2830	1	1	1	0.3937	-2.20	0.9186	127	-6.60	0
FBgn0014380	FBtr0082124	0.6283	0	0	0	0.4756	-5.00	-1.3045	246	-8.40	0
FBgn0014388	FBtr0073146	0.1998	7	7	2	0.3966	-10.20	-0.4941	1354	-9.90	0
FBgn0014391	FBtr0074176	3.5211	0	0	0	0.3511	-2.90	3.4024	94	-4.10	0
FBgn0014395	FBtr0077345	0.1395	2	2	0	0.4030	-7.80	-0.0770	134	-2.20	0
FBgn0014411	FBtr0070311	2.1114	0	0	0	0.4702	-4.80	-0.2504	285	-8.70	0
FBgn0014417	FBtr0331991	1.3343	0	0	0	0.5312	-1.40	1.2041	64	-10.10	0
FBgn0014427	FBtr0085390	0.5992	0	0	0	0.4627	-2.00	1.8993	67	-4.50	0
FBgn0014455	FBtr0074030	0.4946	0	0	0	0.4923	-0.90	1.2608	130	-8.20	0
FBgn0014469	FBtr0088745	0.1537	0	0	0	0.5333	-14.00	2.2547	60	-7.80	0
FBgn0014857	FBtr0333536	2.4815	0	0	0	0.4320	-1.10	1.7462	125	-5.80	0
FBgn0014861	FBtr0081827	0.7967	0	0	0	0.4809	0.00	0.6369	131	-6.10	0
FBgn0014863	FBtr0081617	0.5375	0	0	0	0.3750	-0.80	1.2109	144	-5.50	0
FBgn0014868	FBtr0071344	1.4943	0	0	0	0.3690	-6.50	2.4896	84	-2.80	0
FBgn0014869	FBtr0100482	1.4490	0	0	0	0.4773	-2.00	2.8427	88	-9.50	0
FBgn0014870	FBtr0087072	2.0913	3	3	3	0.3502	0.00	0.7301	317	-2.70	0
FBgn0014877	FBtr0087675	2.0396	0	0	0	0.3750	-1.60	1.9024	104	-3.70	0
FBgn0014879	FBtr0083062	2.7186	0	0	0	0.4593	-6.30	1.2896	135	-2.50	0
FBgn0014906	FBtr0077576	0.9529	1	0	0	0.4982	-3.60	2.0639	275	-7.50	0
FBgn0014930	FBtr0339712	0.6529	6	6	4	0.4729	-6.80	0.1438	277	-5.00	0
FBgn0014931	FBtr0081757	1.3743	5	5	5	0.3176	-0.90	-1.8881	233	-2.70	0
FBgn0015000	FBtr0078991	0.0368	1	0	0	0.4000	-1.60	0.9122	105	-5.60	0
FBgn0015011	FBtr0083378	0.5208	0	0	0	0.4484	-5.00	2.1547	223	-8.40	0
FBgn0015019	FBtr0083337	0.3078	0	0	0	0.4052	-2.60	2.2020	153	-4.50	0
FBgn0015024	FBtr0345162	2.8705	0	0	0	0.4577	-9.20	1.0304	201	-3.30	0
FBgn0015025	FBtr0075504	1.0239	0	0	0	0.3333	-4.00	3.9693	69	-2.70	0
FBgn0015031	FBtr0307035	3.0601	0	0	0	0.3125	-3.50	2.5749	64	-1.90	0
FBgn0015036	FBtr0070388	0.3393	0	0	0	0.4778	-5.20	2.9985	90	-7.90	0
FBgn0015039	FBtr0089055	0.6998	0	0	0	0.4800	-3.20	2.1238	50	-5.60	0
FBgn0015040	FBtr0072321	0.1007	0	0	0	0.5691	0.00	-0.0417	123	-7.60	0
FBgn0015075	FBtr0078492	0.8690	0	0	0	0.3860	-7.00	3.5743	114	-4.10	0
FBgn0015218	FBtr0076491	0.5295	0	0	0	0.4785	-2.00	2.5864	326	-4.10	0
FBgn0015221	FBtr0332168	2.7667	0	0	0	0.3765	-1.40	1.8640	85	-4.60	0
FBgn0015222	FBtr0085632	3.5176	0	0	0	0.4434	-2.90	2.6938	106	-3.10	0
FBgn0015229	FBtr0084157	0.3145	2	2	1	0.4150	-1.30	0.7178	347	-6.40	0
FBgn0015239	FBtr0303654	0.1971	1	1	0	0.3902	-10.70	1.9042	82	-2.50	0
FBgn0015240	FBtr0084756	0.1100	2	1	0	0.5372	-3.40	2.3378	309	-4.20	0
FBgn0015245	FBtr0073434	0.3246	0	0	0	0.4342	-2.90	2.7768	152	-7.10	0
FBgn0015247	FBtr0087296	0.1338	0	0	0	0.3946	-11.00	1.8312	147	-3.10	0
FBgn0015268	FBtr0072219	0.0317	0	0	0	0.4679	-4.70	2.6024	109	-5.80	0
FBgn0015269	FBtr0100113	2.3621	2	2	2	0.4014	-0.50	3.1130	279	-2.60	0
FBgn0015270	FBtr0082866	0.1436	0	0	0	0.4615	-13.40	0.0500	65	-4.30	0
FBgn0015271	FBtr0080543	0.5881	0	0	0	0.3700	-9.40	0.0119	200	-5.20	0
FBgn0015277	FBtr0072064	0.1031	0	0	0	0.4444	-2.60	2.8787	81	-15.30	0
FBgn0015278	FBtr0301816	1.4265	0	0	0	0.4904	-3.00	0.1009	157	-2.70	0
FBgn0015279	FBtr0083940	1.2386	3	3	3	0.4312	-1.70	0.0319	378	-8.10	0
FBgn0015282	FBtr0084520	1.6818	1	1	1	0.4167	-2.20	4.2244	108	-2.90	0
FBgn0015283	FBtr0333453	1.9616	0	0	0	0.4043	-2.50	3.2097	47	-3.30	0
FBgn0015286	FBtr0070584	0.4907	0	0	0	0.4467	-3.80	1.3780	300	-0.80	0
FBgn0015288	FBtr0070148	0.0758	0	0	0	0.4286	NA	3.0609	35	NA	NA
FBgn0015295	FBtr0087244	0.0559	0	0	0	0.4386	-3.40	3.1729	57	0.00	0
FBgn0015296	FBtr0076458	0.2437	0	0	0	0.5113	-5.00	-0.4997	133	-3.10	0
FBgn0015298	FBtr0076879	1.2284	0	0	0	0.3805	-4.50	1.7950	113	-10.80	0
FBgn0015299	FBtr0079590	2.5304	0	0	0	0.3434	-3.60	3.3212	99	-6.60	0
FBgn0015320	FBtr0080115	2.1372	0	0	0	0.5099	-2.10	2.9444	304	-3.50	0
FBgn0015321	FBtr0076395	1.2732	0	0	0	0.4678	-3.80	2.0652	357	-4.80	0
FBgn0015324	FBtr0078700	0.9856	0	0	0	0.3862	-1.90	4.2743	145	-5.70	0
FBgn0015331	FBtr0078967	2.0238	1	1	1	0.3659	0.00	-1.0420	82	-7.70	0
FBgn0015338	FBtr0080850	0.6995	1	1	1	0.2993	0.00	2.8566	284	-4.30	0
FBgn0015351	FBtr0336486	0.4137	0	0	0	0.2812	NA	0.8761	32	NA	NA
FBgn0015359	FBtr0072877	0.5442	1	1	0	0.4054	-0.50	3.6466	111	-7.60	0
FBgn0015360	FBtr0072904	0.6462	3	3	3	0.5444	-7.00	0.5236	259	-8.20	0
FBgn0015371	FBtr0087415	0.4171	1	1	0	0.4524	-7.40	0.1697	473	-3.20	0
FBgn0015372	FBtr0072120	2.1737	1	1	1	0.4665	-8.90	0.4158	343	-1.70	0
FBgn0015376	FBtr0077541	0.2848	1	0	0	0.3615	-1.60	0.6355	130	-10.20	0
FBgn0015379	FBtr0077193	1.7664	0	0	0	0.3763	-1.20	0.8901	93	-6.80	0
FBgn0015380	FBtr0081195	0.2755	2	2	1	0.4651	-6.20	2.0079	387	-5.10	0
FBgn0015391	FBtr0080935	1.4024	0	0	0	0.4414	-2.80	0.4998	111	-5.30	0
FBgn0015393	FBtr0079846	0.0855	0	0	0	0.3774	-2.20	1.9787	106	-5.40	0
FBgn0015396	FBtr0082237	0.6630	2	2	0	0.4422	0.00	2.9985	346	-6.50	0
FBgn0015399	FBtr0346702	0.3340	3	3	1	0.4126	-1.30	1.9194	1127	-12.20	0
FBgn0015402	FBtr0078766	0.3866	2	2	1	0.5539	-4.50	0.7516	269	-9.20	0
FBgn0015477	FBtr0088618	1.8592	2	2	2	0.3526	-2.50	0.8024	173	-3.90	0
FBgn0015509	FBtr0088848	3.1658	1	1	1	0.5164	-7.00	1.8645	366	-2.60	0
FBgn0015513	FBtr0084459	0.2319	6	6	3	0.4470	-3.00	2.7658	575	-4.50	0
FBgn0015520	FBtr0083335	3.5364	0	0	0	0.3577	-4.50	-0.1515	123	-5.70	0
FBgn0015521	FBtr0273293	0.1998	0	0	0	0.4783	-3.30	3.2006	115	-10.30	0
FBgn0015522	FBtr0086799	0.0823	6	2	0	0.4052	-0.30	1.2040	733	-6.80	0
FBgn0015524	FBtr0342796	0.2113	2	2	0	0.5000	-0.90	0.8901	664	-7.40	1
FBgn0015527	FBtr0077223	0.9402	0	0	0	0.4239	-8.50	2.7094	92	-7.20	0
FBgn0015541	FBtr0085066	0.3994	1	1	0	0.4821	-8.70	2.2909	811	-6.70	0
FBgn0015544	FBtr0072256	0.8181	0	0	0	0.4138	-3.30	2.3864	87	-12.60	0
FBgn0015546	FBtr0080630	0.5219	1	1	0	0.3333	-1.40	2.5826	69	-11.80	0
FBgn0015550	FBtr0075216	0.1337	1	1	1	0.4595	-1.80	0.2637	111	-8.80	0
FBgn0015553	FBtr0081131	1.8022	2	2	2	0.3419	-0.10	1.9022	117	-5.20	0
FBgn0015558	FBtr0333749	0.3223	0	0	0	0.4979	-9.30	1.0304	235	-4.10	0
FBgn0015568	FBtr0081544	0.1111	0	0	0	0.5269	-5.70	-0.1037	186	-12.40	0
FBgn0015569	FBtr0289953	0.0674	0	0	0	0.4762	-6.30	-1.1773	210	-7.60	0
FBgn0015570	FBtr0081540	0.3778	0	0	0	0.4095	-0.40	0.9379	105	-7.10	0
FBgn0015571	FBtr0339708	0.2384	0	0	0	0.4783	NA	2.5073	23	NA	NA
FBgn0015582	FBtr0088176	0.2517	0	0	0	0.4204	-12.00	2.1451	157	-4.70	0
FBgn0015589	FBtr0085351	0.2737	2	2	1	0.5178	-4.00	-1.1289	253	-10.80	0
FBgn0015600	FBtr0112883	0.1787	0	0	0	0.4444	-4.40	3.6665	63	-2.60	0
FBgn0015602	FBtr0087442	2.4615	0	0	0	0.3168	-2.10	2.9242	101	-0.80	0
FBgn0015609	FBtr0100315	1.0570	0	0	0	0.3615	-4.70	3.9172	603	-12.70	0
FBgn0015614	FBtr0088930	0.5229	2	1	0	0.4453	-1.20	4.6296	256	-7.90	0
FBgn0015615	FBtr0074290	0.8524	1	1	1	0.2740	-9.60	1.0777	73	-3.20	0
FBgn0015618	FBtr0076369	1.6092	0	0	0	0.3692	-6.50	3.8990	65	-8.50	0
FBgn0015621	FBtr0078011	0.7888	0	0	0	0.4435	-2.10	1.3153	115	-0.70	0
FBgn0015622	FBtr0085438	0.3061	1	1	0	0.4777	-8.80	2.8543	224	-0.90	0
FBgn0015623	FBtr0079250	1.8080	0	0	0	0.5098	-4.20	3.0033	306	-7.90	0
FBgn0015625	FBtr0084728	3.4194	1	1	1	0.5000	-8.00	4.2587	288	-4.30	0
FBgn0015663	FBtr0339571	0.5039	1	1	1	0.4286	-11.20	1.1251	189	-5.70	0
FBgn0015664	FBtr0310483	3.1878	1	1	1	0.3837	0.00	2.7315	344	-4.00	0
FBgn0015714	FBtr0345527	0.3165	0	0	0	0.4444	NA	0.2048	27	NA	NA
FBgn0015721	FBtr0342842	0.7078	0	0	0	0.4367	-4.60	3.3149	648	-7.20	0
FBgn0015737	FBtr0085164	0.3053	0	0	0	0.4472	-5.10	1.3166	161	-7.80	0
FBgn0015754	FBtr0304747	0.6812	0	0	0	0.4677	-2.80	0.2824	124	-5.20	0
FBgn0015756	FBtr0340226	0.1828	0	0	0	0.4824	-4.40	2.5330	85	-5.50	0
FBgn0015765	FBtr0084580	0.2975	4	4	4	0.4601	-3.80	1.0163	163	-3.60	0
FBgn0015766	FBtr0077132	0.4576	0	0	0	0.4175	-1.00	-1.6101	206	-10.10	0
FBgn0015772	FBtr0081187	0.1716	1	0	0	0.5015	-6.40	2.1678	329	-4.40	0
FBgn0015773	FBtr0308337	0.5780	0	0	0	0.3695	-5.40	2.8411	590	-9.30	0
FBgn0015774	FBtr0302018	1.1544	1	1	1	0.4813	-5.00	-1.5328	320	-7.70	0
FBgn0015776	FBtr0332370	0.5521	1	1	0	0.4474	-4.20	1.3877	447	-10.90	0
FBgn0015777	FBtr0079382	0.6269	0	0	0	0.4507	-3.70	2.6632	142	-3.60	0
FBgn0015778	FBtr0082799	0.6179	1	1	1	0.4165	-2.30	-0.7402	581	-2.50	0
FBgn0015781	FBtr0083713	0.8310	1	1	1	0.4202	-2.80	1.1270	238	-2.90	0
FBgn0015789	FBtr0077337	3.5174	0	0	0	0.4505	-7.40	1.4602	293	-0.40	0
FBgn0015790	FBtr0084011	1.6809	0	0	0	0.4409	-3.00	4.2987	220	-8.20	0
FBgn0015791	FBtr0080626	1.5085	0	0	0	0.4807	-3.90	2.8458	337	-1.50	0
FBgn0015793	FBtr0076705	0.8206	0	0	0	0.4505	-8.00	1.9857	91	-4.10	0
FBgn0015794	FBtr0070849	1.3162	0	0	0	0.3709	-2.60	2.9299	151	-4.30	0
FBgn0015795	FBtr0308612	0.9160	2	2	0	0.4610	-1.60	2.7193	154	-4.70	0
FBgn0015797	FBtr0080361	1.4277	0	0	0	0.4953	-2.20	1.1573	317	-1.70	0
FBgn0015799	FBtr0070146	0.4172	4	4	3	0.5317	-3.10	1.4626	694	-5.60	0
FBgn0015801	FBtr0072427	1.3694	0	0	0	0.5059	-6.90	2.2687	506	-6.80	0
FBgn0015803	FBtr0081356	2.3265	4	4	3	0.4173	-5.60	0.6192	508	-11.60	0
FBgn0015805	FBtr0073317	2.2380	0	0	0	0.4903	-4.30	2.5873	206	-8.00	0
FBgn0015806	FBtr0077114	2.0537	1	1	0	0.5217	-0.40	1.5513	531	-7.20	0
FBgn0015808	FBtr0081109	0.6177	0	0	0	0.3982	-4.40	3.3437	113	-0.10	0
FBgn0015818	FBtr0070894	1.7552	1	1	0	0.3483	-4.90	2.8540	89	-9.70	0
FBgn0015828	FBtr0076108	0.3077	2	2	2	0.4796	-6.50	2.3720	196	-8.90	0
FBgn0015829	FBtr0073234	2.6181	0	0	0	0.3482	-3.60	2.8802	112	-11.10	0
FBgn0015831	FBtr0307275	0.4818	0	0	0	0.3596	-3.80	1.5798	89	-0.70	0
FBgn0015834	FBtr0079053	0.7369	1	1	0	0.3659	-0.30	3.2495	82	-6.30	0
FBgn0015838	FBtr0088566	0.3695	6	5	4	0.5000	-14.70	0.9479	338	-15.40	0
FBgn0015903	FBtr0072066	2.9996	0	0	0	0.4532	-8.00	-2.9707	139	-6.50	0
FBgn0015904	FBtr0300551	0.2203	2	2	0	0.4524	-6.60	2.9202	431	-5.60	0
FBgn0015905	FBtr0077952	0.1874	0	0	0	0.3793	-4.00	2.4972	87	-5.50	0
FBgn0015919	FBtr0075909	0.2546	2	2	1	0.4692	-10.40	1.8805	1138	-8.80	0
FBgn0015924	FBtr0331232	0.7606	4	4	3	0.4231	-2.50	2.0483	260	-7.00	0
FBgn0015925	FBtr0089872	1.6366	0	0	0	0.5158	-2.40	2.0335	95	-4.10	0
FBgn0015926	FBtr0074007	3.1121	0	0	0	0.3922	-1.70	3.2651	102	-5.00	0
FBgn0015929	FBtr0088982	0.4060	0	0	0	0.4369	-4.90	1.2495	103	-3.10	0
FBgn0015946	FBtr0075130	1.0432	0	0	0	0.3428	-1.40	1.6248	318	-5.70	0
FBgn0015949	FBtr0111010	1.7601	7	7	7	0.4499	-2.40	2.9641	749	-4.10	0
FBgn0016013	FBtr0073278	0.1466	0	0	0	0.4737	-5.40	2.2954	114	-3.90	0
FBgn0016031	FBtr0077160	0.1509	6	5	3	0.4513	-3.90	2.4353	1192	-7.30	0
FBgn0016032	FBtr0089033	0.2690	0	0	0	0.4270	-3.90	3.2006	185	-8.30	0
FBgn0016034	FBtr0089632	1.5346	0	0	0	0.4505	-0.80	2.7355	333	-2.40	0
FBgn0016036	FBtr0076836	0.3429	0	0	0	NA	NA	NA		NA	NA
FBgn0016038	FBtr0089723	1.1482	0	0	0	0.3294	-2.50	1.7809	85	0.00	0
FBgn0016041	FBtr0071073	1.1753	0	0	0	0.4037	-2.90	2.8802	109	-9.80	0
FBgn0016047	FBtr0089382	0.2146	0	0	0	0.4397	-3.90	0.7680	116	-0.60	0
FBgn0016053	FBtr0112519	0.1326	0	0	0	0.3478	-4.90	1.8997	69	-7.30	0
FBgn0016054	FBtr0336830	0.1027	0	0	0	0.4722	-13.00	4.2481	72	-6.90	0
FBgn0016059	FBtr0302161	3.0616	4	4	3	0.4669	-4.20	1.9151	574	-5.40	0
FBgn0016061	FBtr0309180	0.3265	6	6	3	0.4525	-5.30	0.2902	1748	-8.30	1
FBgn0016070	FBtr0076550	5.7401	2	2	2	0.4644	0.00	1.7345	491	-2.70	0
FBgn0016075	FBtr0079036	0.5329	1	1	0	0.5000	-5.70	-0.9475	186	-5.30	0
FBgn0016076	FBtr0300020	0.1327	1	1	1	0.4480	-2.40	0.2696	375	-10.40	0
FBgn0016078	FBtr0088553	2.6763	0	0	0	0.4932	-2.10	3.0295	219	-7.70	0
FBgn0016080	FBtr0074405	0.0744	0	0	0	0.3214	-4.70	1.4499	112	-2.50	0
FBgn0016081	FBtr0306241	2.0907	1	1	1	0.3574	-2.30	0.9479	277	-1.70	0
FBgn0016119	FBtr0084432	2.0673	0	0	0	0.3929	-5.40	1.0777	84	-3.40	0
FBgn0016120	FBtr0346155	2.7638	0	0	0	0.3563	-2.20	1.8475	87	-3.60	0
FBgn0016122	FBtr0079685	2.2523	0	0	0	0.4841	-10.70	0.9603	345	-9.30	0
FBgn0016126	FBtr0089067	0.2371	4	3	3	0.3626	0.00	1.5456	273	-4.00	0
FBgn0016131	FBtr0340063	0.8726	0	0	0	0.4250	-5.10	0.0951	80	-5.20	0
FBgn0016641	FBtr0071686	0.6145	4	4	3	0.5024	-7.80	-0.0444	209	-4.80	0
FBgn0016672	FBtr0082865	0.0124	2	0	0	0.4211	-7.10	1.0589	133	-2.40	0
FBgn0016684	FBtr0329884	0.1829	0	0	0	0.4951	-2.60	2.6324	103	-8.80	0
FBgn0016685	FBtr0334701	1.8160	0	0	0	0.3735	-4.20	0.8459	83	-3.50	0
FBgn0016687	FBtr0273253	1.6780	0	0	0	0.5036	-0.50	1.3118	137	-3.50	0
FBgn0016691	FBtr0083063	2.6068	0	0	0	0.4286	-7.90	2.1432	70	-3.50	0
FBgn0016693	FBtr0082655	0.9316	0	0	0	0.5179	-4.50	1.2628	280	-4.70	0
FBgn0016694	FBtr0076775	0.3957	0	0	0	0.4767	-7.10	-0.1357	86	-8.50	0
FBgn0016696	FBtr0078247	1.1294	1	1	1	0.4669	-10.50	2.4576	272	-1.10	0
FBgn0016697	FBtr0086910	1.9874	0	0	0	0.4096	-2.50	1.6933	83	-3.10	0
FBgn0016698	FBtr0077589	0.4491	1	1	0	0.3299	-4.10	1.3859	97	-0.60	0
FBgn0016700	FBtr0084104	4.0159	1	1	0	0.4120	-5.80	1.8760	267	-1.40	0
FBgn0016701	FBtr0086829	0.9981	0	0	0	0.4130	0.00	2.7488	138	-11.50	0
FBgn0016715	FBtr0072561	0.4857	0	0	0	0.4928	-8.30	2.9578	69	-8.30	0
FBgn0016726	FBtr0071592	0.4662	0	0	0	0.4340	-5.20	1.6898	53	-4.70	0
FBgn0016754	FBtr0112889	0.0754	6	4	2	0.3766	-9.10	1.6509	316	0.00	0
FBgn0016756	FBtr0077095	1.6742	1	1	1	0.5298	-4.10	0.0735	302	-6.70	0
FBgn0016762	FBtr0072083	0.4159	0	0	0	0.5217	-13.80	-0.5882	115	-3.70	0
FBgn0016794	FBtr0072926	2.4527	0	0	0	0.4932	-3.90	2.3923	73	-10.20	0
FBgn0016797	FBtr0112890	0.4299	10	9	5	0.4466	-3.80	3.5245	1059	-7.30	0
FBgn0016917	FBtr0334581	2.7209	1	1	1	0.5041	-10.10	-2.0503	484	-8.60	0
FBgn0016926	FBtr0077988	0.1298	3	2	0	0.4141	-8.10	1.7502	483	-5.60	0
FBgn0016930	FBtr0089288	1.3798	6	6	6	0.4048	-3.00	2.7425	756	-13.60	0
FBgn0016970	FBtr0088505	0.0853	0	0	0	0.2222	NA	4.6059	9	NA	NA
FBgn0016977	FBtr0330653	1.5062	1	1	1	0.4923	-5.70	-1.1716	65	-4.40	0
FBgn0016978	FBtr0079355	0.4418	1	1	0	0.4235	-0.30	3.5245	196	-9.00	0
FBgn0016983	FBtr0076851	1.5428	1	1	1	0.4434	-2.50	0.9312	106	-12.90	0
FBgn0016984	FBtr0071563	0.0997	4	2	0	0.4666	-16.70	1.5002	658	-6.90	0
FBgn0017414	FBtr0331937	1.3653	1	1	1	0.4315	-2.30	1.3551	146	-3.90	0
FBgn0017418	FBtr0089507	1.6006	2	2	2	0.4489	-3.70	3.1714	479	-16.30	0
FBgn0017429	FBtr0076649	0.2721	0	0	0	0.4408	-8.10	0.2147	152	-2.00	0
FBgn0017430	FBtr0076650	0.9322	0	0	0	0.3162	-6.00	3.1752	136	-3.00	0
FBgn0017448	FBtr0085861	0.2095	6	6	3	0.4556	-2.20	1.1244	630	-4.30	0
FBgn0017457	FBtr0078133	3.0694	0	0	0	0.4569	-4.50	1.4916	197	-5.90	0
FBgn0017482	FBtr0071848	0.2657	0	0	0	0.3214	NA	1.5968	28	NA	NA
FBgn0017545	FBtr0089175	0.7730	0	0	0	0.4074	NA	2.1364	27	NA	NA
FBgn0017550	FBtr0078741	1.2697	6	6	6	0.4904	-3.50	-0.9895	1046	-5.40	0
FBgn0017551	FBtr0079342	0.2571	1	1	1	0.3925	-3.40	2.7813	107	-5.70	0
FBgn0017558	FBtr0306807	2.9976	2	2	2	0.4821	0.00	2.5864	811	-9.10	0
FBgn0017561	FBtr0073405	0.0277	0	0	0	0.4636	-5.00	-0.5018	632	-8.50	0
FBgn0017566	FBtr0071180	0.7480	0	0	0	0.3750	-3.70	1.5798	96	-6.00	0
FBgn0017567	FBtr0083191	2.0787	0	0	0	0.3409	-0.80	3.3149	88	-5.70	0
FBgn0017572	FBtr0331560	1.2344	0	0	0	0.4521	-2.10	1.9608	303	-2.40	0
FBgn0017577	FBtr0082279	0.9225	0	0	0	0.3830	0.00	4.6558	141	-7.30	0
FBgn0017578	FBtr0075018	2.7609	1	1	1	0.3396	-8.90	3.2670	159	-6.00	0
FBgn0017579	FBtr0076633	0.1228	0	0	0	0.4483	NA	-0.5799	29	NA	NA
FBgn0017581	FBtr0082535	0.6426	2	2	2	0.4220	-4.80	2.6126	519	-10.90	0
FBgn0017590	FBtr0084337	0.2293	4	4	2	0.4107	-9.20	2.2886	784	-3.70	0
FBgn0019624	FBtr0334890	1.7269	0	0	0	0.4043	-1.70	2.5889	47	-1.70	0
FBgn0019637	FBtr0078704	0.8598	0	0	0	0.3942	-1.00	0.1388	104	-2.20	0
FBgn0019643	FBtr0072255	0.6544	0	0	0	0.4908	-3.30	3.2149	546	-11.40	0
FBgn0019644	FBtr0076405	1.9518	0	0	0	0.4058	-7.30	1.9237	69	-6.90	0
FBgn0019650	FBtr0089185	0.7884	2	2	2	0.3985	0.00	-0.2243	527	-4.40	0
FBgn0019662	FBtr0076846	1.1348	0	0	0	0.5219	-1.70	3.3304	297	-5.30	0
FBgn0019686	FBtr0081329	4.1125	2	2	2	0.4483	-11.60	1.7918	319	-7.30	0
FBgn0019830	FBtr0077731	1.5333	4	4	4	0.4067	-5.70	0.5648	504	-1.40	0
FBgn0019886	FBtr0072348	0.2950	1	0	0	0.4716	-0.30	1.2954	352	-6.60	0
FBgn0019890	FBtr0080562	1.5595	0	0	0	0.4270	-0.90	2.2474	281	-2.40	0
FBgn0019925	FBtr0083117	2.9252	1	1	1	0.4608	-2.80	3.2164	217	-7.80	0
FBgn0019932	FBtr0079994	4.3557	0	0	0	0.4655	-5.70	0.9843	58	-4.20	0
FBgn0019936	FBtr0083964	0.0844	0	0	0	0.3778	-3.40	1.9953	90	-8.70	0
FBgn0019938	FBtr0087511	1.0110	0	0	0	0.4490	-3.70	3.9172	98	-6.20	0
FBgn0019947	FBtr0333479	1.6164	1	1	1	0.4747	-9.90	-2.9128	158	-5.80	0
FBgn0019948	FBtr0072203	0.2462	0	0	0	0.3791	-7.90	1.8950	153	-2.30	0
FBgn0019949	FBtr0071937	1.2046	0	0	0	0.4088	-4.00	2.2572	137	-6.10	0
FBgn0019952	FBtr0334870	0.1307	0	0	0	0.5458	-7.50	-0.8349	306	-9.90	0
FBgn0019957	FBtr0084172	1.6844	0	0	0	0.3973	-5.70	3.5198	73	-4.90	0
FBgn0019960	FBtr0335200	1.1967	0	0	0	0.5385	-2.00	2.4217	143	-5.80	0
FBgn0019968	FBtr0346265	0.5288	1	1	1	0.4826	-0.70	0.7665	344	-5.10	0
FBgn0019972	FBtr0085482	2.4755	0	0	0	0.4250	-7.60	0.8787	240	-4.70	0
FBgn0019982	FBtr0077453	0.1550	0	0	0	0.4774	-4.40	1.3596	155	-7.30	0
FBgn0019990	FBtr0085787	1.2599	3	3	2	0.4381	-2.70	2.4943	331	-3.80	0
FBgn0020018	FBtr0084664	0.6764	1	1	0	0.4683	-5.00	0.9230	126	-5.30	0
FBgn0020224	FBtr0076614	0.8615	1	1	1	0.5155	-9.50	2.6857	355	-8.60	0
FBgn0020235	FBtr0085539	1.5779	0	0	0	0.5319	-11.00	0.3258	47	-12.30	0
FBgn0020236	FBtr0300597	0.5332	0	0	0	0.3818	-3.20	1.1601	110	-3.40	0
FBgn0020238	FBtr0083565	3.2390	0	0	0	0.4717	-6.30	3.3526	159	-5.30	0
FBgn0020248	FBtr0072713	0.0110	1	1	0	0.3706	-6.80	-4.5903	170	-5.30	0
FBgn0020249	FBtr0081844	0.8170	1	1	1	0.3582	-3.00	1.5679	134	-5.00	0
FBgn0020251	FBtr0301562	0.7826	20	20	19	0.4415	-2.50	1.9550	1273	-12.50	0
FBgn0020255	FBtr0073471	2.1509	0	0	0	0.3904	-3.30	0.7058	146	-1.80	0
FBgn0020257	FBtr0343014	0.5450	1	1	1	0.4361	-2.60	0.2468	266	-3.60	0
FBgn0020261	FBtr0302082	0.7268	3	3	3	0.4848	-4.40	2.2178	198	-8.40	0
FBgn0020269	FBtr0087477	0.1683	0	0	0	0.4237	-7.60	2.8459	354	-13.60	0
FBgn0020270	FBtr0080213	0.2665	1	1	1	0.3778	-0.20	1.9278	90	-10.70	0
FBgn0020272	FBtr0077211	0.0770	0	0	0	0.4571	NA	-2.3142	35	NA	NA
FBgn0020278	FBtr0084273	1.7251	5	5	5	0.4248	-4.30	0.3345	379	-4.70	0
FBgn0020279	FBtr0301915	1.9909	0	0	0	0.3810	-7.50	1.4091	63	-8.90	0
FBgn0020294	FBtr0333449	0.3689	0	0	0	0.4673	-4.70	2.8759	505	-8.00	0
FBgn0020299	FBtr0334956	0.4674	4	4	1	0.4514	-0.40	2.1823	350	-7.70	0
FBgn0020300	FBtr0075126	1.5788	3	3	1	0.3876	-5.30	-0.9749	387	-4.50	0
FBgn0020304	FBtr0302612	0.2805	0	0	0	0.5274	-7.30	1.9042	1003	-11.80	0
FBgn0020305	FBtr0078030	1.5335	0	0	0	0.4691	-1.30	1.4821	81	-10.30	0
FBgn0020306	FBtr0071604	0.9404	4	4	4	0.4167	-4.20	2.8256	204	-10.70	0
FBgn0020307	FBtr0071776	0.2259	0	0	0	0.4706	NA	1.8407	17	NA	NA
FBgn0020309	FBtr0335476	0.0696	11	5	1	0.4819	-5.20	1.2409	772	-4.70	0
FBgn0020312	FBtr0071637	0.1451	5	4	4	0.4574	-4.50	3.3955	223	-3.60	0
FBgn0020369	FBtr0077189	2.1430	0	0	0	0.3492	0.00	1.6785	126	-4.30	0
FBgn0020370	FBtr0087775	2.3619	0	0	0	0.4867	-2.40	1.0811	113	-4.60	0
FBgn0020372	FBtr0330600	0.2514	1	1	0	0.4483	-2.10	0.6315	696	-1.80	0
FBgn0020377	FBtr0088004	1.0225	0	0	0	0.3800	0.00	-1.6599	100	-3.40	0
FBgn0020378	FBtr0310290	0.1306	0	0	0	0.4460	-4.30	1.6886	500	-5.30	0
FBgn0020379	FBtr0337106	0.1802	3	2	0	0.4238	-4.00	-0.0370	597	-2.60	0
FBgn0020381	FBtr0114560	1.1195	0	0	0	0.4194	-1.50	1.6509	62	-2.00	0
FBgn0020385	FBtr0100144	1.4538	0	0	0	0.3412	-5.00	-0.0819	85	-6.20	0
FBgn0020386	FBtr0072468	1.3673	0	0	0	0.2419	-5.10	1.1454	62	0.00	0
FBgn0020388	FBtr0075969	1.4799	0	0	0	0.4054	-5.00	-1.4923	111	-10.60	0
FBgn0020389	FBtr0074887	0.1248	0	0	0	0.4131	-5.60	1.4635	213	-5.00	0
FBgn0020391	FBtr0087728	0.1405	1	1	0	0.4071	-2.10	1.2496	226	-6.10	0
FBgn0020392	FBtr0076728	1.7723	0	0	0	0.3333	-6.70	0.5793	102	-6.00	0
FBgn0020407	FBtr0083259	1.5867	0	0	0	0.3902	-6.80	2.0483	82	-3.60	0
FBgn0020412	FBtr0076236	1.4521	7	7	7	0.4104	-9.50	0.1942	1055	-6.20	0
FBgn0020414	FBtr0080864	0.6426	0	0	0	0.4769	-5.80	2.3800	130	-8.10	0
FBgn0020415	FBtr0080861	1.3583	0	0	0	0.4627	-10.10	1.9615	67	-6.70	0
FBgn0020440	FBtr0301883	2.4480	0	0	0	0.4891	-9.80	0.5259	92	-2.90	0
FBgn0020443	FBtr0344859	0.2954	0	0	0	0.5238	-5.30	1.7854	105	-5.70	0
FBgn0020445	FBtr0339548	0.0511	6	2	0	0.3957	-4.30	0.6865	561	-7.40	0
FBgn0020493	FBtr0100160	0.1448	7	7	4	0.4047	-3.70	-1.7238	771	-3.30	0
FBgn0020496	FBtr0334516	2.9429	2	2	2	0.4524	-0.90	2.9202	378	-5.00	0
FBgn0020497	FBtr0346708	4.6213	0	0	0	0.5040	-9.60	0.7647	371	-5.30	1
FBgn0020503	FBtr0080975	0.2529	0	0	0	0.2977	-2.20	3.5042	262	-4.80	0
FBgn0020510	FBtr0082910	1.2956	2	2	1	0.4156	-5.70	-1.3431	154	-3.90	0
FBgn0020513	FBtr0073705	2.3872	1	1	1	0.4713	-1.20	1.5059	244	-7.30	0
FBgn0020521	FBtr0301502	0.4083	3	3	1	0.4561	-8.70	1.5909	842	-9.10	0
FBgn0020545	FBtr0334794	0.1765	0	0	0	0.5682	-5.80	0.8787	88	-7.00	0
FBgn0020616	FBtr0079349	0.4083	0	0	0	0.3136	-3.30	2.1191	118	-3.40	0
FBgn0020617	FBtr0342783	0.0536	0	0	0	0.4527	-4.20	-2.2669	296	-8.60	0
FBgn0020618	FBtr0079565	0.0397	0	0	0	0.4805	-2.40	2.1823	77	-5.30	0
FBgn0020620	FBtr0087605	1.7500	3	3	3	0.5274	-0.40	0.1610	292	-5.10	0
FBgn0020621	FBtr0088601	3.3108	2	2	2	0.3976	-6.60	1.6494	420	-7.50	0
FBgn0020622	FBtr0331205	0.0433	3	0	0	0.4846	0.00	-0.2342	553	-8.40	0
FBgn0020626	FBtr0084801	0.9676	1	1	1	0.5372	-9.20	1.3780	363	-2.90	0
FBgn0020633	FBtr0076585	2.4013	0	0	0	0.4052	-0.40	3.8776	153	-6.30	0
FBgn0020637	FBtr0077059	0.6581	0	0	0	0.4918	-1.50	2.7001	61	-4.90	0
FBgn0020638	FBtr0077058	0.4554	0	0	0	0.4918	-1.50	2.7001	61	-5.90	0
FBgn0020639	FBtr0077057	0.8789	0	0	0	0.3922	-3.10	3.6241	51	-3.00	0
FBgn0020641	FBtr0333581	0.0604	0	0	0	0.5270	-2.70	3.5722	74	-3.90	0
FBgn0020642	FBtr0076991	1.1684	0	0	0	0.3913	0.00	3.1990	92	-3.10	0
FBgn0020647	FBtr0084506	0.4959	6	6	3	0.4354	-1.30	3.5742	379	-9.90	0
FBgn0020653	FBtr0071167	0.5940	0	0	0	0.4468	-2.50	2.3923	188	-4.10	0
FBgn0020655	FBtr0075981	0.9036	1	1	0	0.4783	-3.20	-0.1360	368	-9.50	0
FBgn0020660	FBtr0113680	0.9039	0	0	0	0.2353	-0.20	1.4903	68	-4.50	0
FBgn0020762	FBtr0112899	0.2239	3	3	1	0.4328	-2.30	0.0500	751	-7.60	0
FBgn0020764	FBtr0072151	0.1164	0	0	0	0.5044	-5.30	-0.9749	113	-2.70	0
FBgn0020767	FBtr0329879	0.7956	5	5	5	0.4239	-4.50	1.2157	427	-0.40	0
FBgn0020887	FBtr0074917	0.2163	10	10	7	0.4494	0.00	3.3067	474	-5.60	0
FBgn0020908	FBtr0334933	3.2573	1	1	1	0.2719	-4.80	2.4359	114	-5.70	0
FBgn0020909	FBtr0073820	0.5477	0	0	0	0.4130	-4.20	1.8441	92	-8.10	0
FBgn0020910	FBtr0336783	0.0625	0	0	0	0.3889	NA	1.6156	36	NA	NA
FBgn0020912	FBtr0089391	0.3826	0	0	0	0.5014	-1.70	-0.6065	1081	-5.90	0
FBgn0020930	FBtr0339705	0.2193	2	2	2	0.4261	-6.20	0.8554	115	-4.10	0
FBgn0021742	FBtr0073400	0.1393	0	0	0	0.4928	-7.00	1.7328	69	-4.90	0
FBgn0021750	FBtr0083086	0.4374	3	2	0	0.3491	-7.30	2.9210	169	-5.40	0
FBgn0021760	FBtr0089461	2.4405	4	4	3	0.4477	-3.30	1.7854	784	-8.10	0
FBgn0021761	FBtr0089881	1.2540	0	0	0	0.4750	-0.60	1.8818	160	-6.80	0
FBgn0021764	FBtr0302260	3.7339	3	3	3	0.4549	-1.10	-0.8940	233	-8.50	0
FBgn0021765	FBtr0074511	2.1797	0	0	0	0.5041	-0.30	2.6701	123	-3.60	0
FBgn0021767	FBtr0071244	0.2851	1	1	0	0.3861	-3.60	0.5695	575	-2.80	0
FBgn0021768	FBtr0075328	1.1973	0	0	0	0.4048	-0.20	1.8523	126	-11.30	0
FBgn0021776	FBtr0083847	0.1826	3	3	1	0.3600	-0.60	2.2547	325	-3.60	0
FBgn0021795	FBtr0088153	0.7883	2	0	0	0.4702	-1.90	2.9344	151	-7.50	0
FBgn0021796	FBtr0080422	1.4430	3	3	3	0.4869	-2.50	-0.0604	306	-2.40	0
FBgn0021800	FBtr0077497	0.9664	3	3	3	0.4280	-10.00	-0.4642	264	-2.10	0
FBgn0021814	FBtr0088825	1.3320	0	0	0	0.3736	-1.70	0.7075	91	-4.20	0
FBgn0021818	FBtr0086962	0.1990	1	0	0	0.5167	-10.00	0.4069	120	-3.30	0
FBgn0021825	FBtr0088641	1.8528	0	0	0	0.3770	-1.90	2.4160	122	-1.00	0
FBgn0021847	FBtr0086000	0.0708	1	0	0	0.4365	-1.90	-1.8113	181	0.00	0
FBgn0021856	FBtr0330677	1.6294	0	0	0	0.4030	-1.00	3.1991	67	-6.40	0
FBgn0021872	FBtr0310044	0.3196	4	4	0	0.4543	-1.60	3.1812	328	-1.50	0
FBgn0021874	FBtr0078075	0.5335	0	0	0	0.4561	-6.90	0.2160	57	-2.90	0
FBgn0021875	FBtr0072253	0.1118	0	0	0	0.4074	NA	2.8522	27	NA	NA
FBgn0021895	FBtr0072234	0.3631	1	1	1	0.5128	-1.40	0.5371	195	-5.70	0
FBgn0021906	FBtr0334843	0.8556	0	0	0	0.3929	-4.70	3.8795	84	-6.10	0
FBgn0021944	FBtr0346584	0.0591	0	0	0	0.3878	-3.60	1.6861	98	-1.00	0
FBgn0021967	FBtr0077520	0.8369	0	0	0	0.4066	-4.90	1.4746	91	-13.10	0
FBgn0021979	FBtr0343188	2.6980	0	0	0	0.5000	-4.20	3.7318	100	-4.50	0
FBgn0021995	FBtr0088788	1.2798	0	0	0	0.3947	-5.80	3.8573	76	-10.50	0
FBgn0022023	FBtr0079031	0.5281	0	0	0	0.5111	-6.80	3.5719	45	-6.80	0
FBgn0022027	FBtr0088694	0.2977	1	1	1	0.3600	-1.90	1.8993	75	-7.70	0
FBgn0022029	FBtr0086915	1.6077	1	1	1	0.4968	-8.00	3.1991	310	-0.30	0
FBgn0022069	FBtr0080473	2.1067	0	0	0	0.4425	-2.70	0.2883	113	-6.20	0
FBgn0022097	FBtr0087335	1.6014	0	0	0	0.4020	0.00	3.7408	102	-7.00	0
FBgn0022153	FBtr0305968	0.1041	1	1	1	0.5141	-9.20	2.8787	142	-12.10	0
FBgn0022160	FBtr0087308	0.8035	0	0	0	0.4842	-6.10	1.7582	190	-7.40	0
FBgn0022213	FBtr0080930	2.1351	1	1	0	0.4043	0.00	3.9037	141	-3.70	0
FBgn0022224	FBtr0086211	5.6547	0	0	0	0.3226	-4.30	1.5642	93	-9.50	0
FBgn0022238	FBtr0086777	5.3418	0	0	0	0.4980	-2.50	-2.2570	249	-1.80	0
FBgn0022246	FBtr0336990	0.9395	0	0	0	0.4643	-6.70	2.4722	56	-6.70	0
FBgn0022288	FBtr0086043	0.6534	0	0	0	0.3939	-3.30	-0.0118	99	-2.00	0
FBgn0022338	FBtr0083707	3.1465	0	0	0	0.5000	-3.50	-2.8732	148	-0.80	0
FBgn0022343	FBtr0072391	0.3437	0	0	0	0.3596	-0.40	0.4738	89	-7.90	0
FBgn0022344	FBtr0083358	1.2826	1	0	0	0.3488	-3.30	1.4259	43	-3.00	0
FBgn0022349	FBtr0085839	0.6456	1	0	0	0.4545	-5.30	2.3517	363	-6.40	0
FBgn0022359	FBtr0082324	1.7682	0	0	0	0.4085	-3.50	1.3583	71	-8.40	0
FBgn0022361	FBtr0089995	3.0493	4	4	4	0.3924	-6.10	0.1289	316	-8.70	0
FBgn0022382	FBtr0088437	0.6439	0	0	0	0.4489	-5.60	1.7565	352	-3.80	0
FBgn0022699	FBtr0077017	0.8418	1	1	0	0.4202	-7.60	3.9032	119	-7.70	0
FBgn0022702	FBtr0072795	0.2719	0	0	0	0.5000	-9.60	-1.4276	100	-7.90	0
FBgn0022708	FBtr0072163	0.8860	1	1	1	0.4196	-3.30	1.7960	112	-3.70	0
FBgn0022709	FBtr0076017	1.0914	0	0	0	0.5140	-8.20	2.1151	214	-8.80	0
FBgn0022710	FBtr0332497	0.2792	6	6	6	0.4589	-2.50	2.6280	950	-8.10	0
FBgn0022724	FBtr0074514	1.2234	0	0	0	0.4222	-2.00	-0.9977	90	-10.00	0
FBgn0022740	FBtr0089547	0.3832	0	0	0	0.4000	-4.60	1.6431	170	-5.50	0
FBgn0022764	FBtr0087887	0.7570	2	2	2	0.4836	-5.00	2.7378	550	-2.70	0
FBgn0022768	FBtr0070685	0.7564	5	5	5	0.4123	-1.80	1.1573	747	-6.90	0
FBgn0022770	FBtr0077335	0.3880	0	0	0	0.3730	-2.10	1.8407	126	-4.00	0
FBgn0022772	FBtr0088959	2.1586	0	0	0	0.4846	-11.20	0.8327	130	-6.50	0
FBgn0022774	FBtr0074961	0.2704	0	0	0	0.5165	-3.30	2.9878	91	-5.60	0
FBgn0022786	FBtr0071070	0.0944	0	0	0	0.2788	-0.30	-1.7924	104	-5.40	0
FBgn0022787	FBtr0301715	0.4502	4	4	1	0.4580	-1.40	1.0826	583	-3.60	0
FBgn0022800	FBtr0084874	0.2493	0	0	0	0.4928	-13.30	1.5991	209	-8.40	0
FBgn0022893	FBtr0085919	2.6049	0	0	0	0.3667	-1.40	4.2587	240	-3.50	0
FBgn0022935	FBtr0077016	0.0494	0	0	0	0.4583	-10.50	2.8058	144	-8.70	0
FBgn0022936	FBtr0078439	1.6878	0	0	0	0.5556	NA	2.5773	9	NA	NA
FBgn0022942	FBtr0070683	1.7856	0	0	0	0.4667	-3.90	1.0043	315	-15.80	0
FBgn0022943	FBtr0083551	2.2779	0	0	0	0.3088	-1.80	1.7328	68	-1.90	0
FBgn0022959	FBtr0076027	1.3837	0	0	0	0.4924	-3.40	1.3912	264	-6.20	0
FBgn0022960	FBtr0086183	2.8596	1	1	1	0.4524	-3.20	3.1706	294	-9.70	0
FBgn0022981	FBtr0078859	0.3423	2	2	2	0.4458	-7.50	2.2687	83	-2.70	0
FBgn0022984	FBtr0290254	2.3775	1	1	1	0.2812	-6.30	4.2806	96	-2.50	0
FBgn0022985	FBtr0071828	2.1107	1	1	1	0.5214	-3.30	-0.2419	257	-9.20	0
FBgn0022986	FBtr0071843	2.9778	1	1	1	0.3577	-0.70	1.3441	123	-0.70	0
FBgn0022987	FBtr0086923	3.6746	0	0	0	0.3942	-8.70	1.3843	137	-4.80	0
FBgn0023000	FBtr0072570	1.3500	1	1	1	0.3878	-5.00	-0.1022	147	-9.60	0
FBgn0023001	FBtr0100141	0.3299	3	3	2	0.4344	-5.30	1.1857	762	-6.80	0
FBgn0023023	FBtr0089686	0.5352	1	1	0	0.4060	-3.90	-0.3124	133	-4.60	0
FBgn0023081	FBtr0072287	0.8787	1	1	1	0.4144	-4.10	2.0607	111	-6.40	0
FBgn0023083	FBtr0083637	0.3391	2	1	0	0.4695	-5.30	-0.2072	884	-10.20	0
FBgn0023094	FBtr0074924	0.3090	3	3	0	0.4146	-7.40	-0.6273	164	-9.40	0
FBgn0023095	FBtr0075832	0.3344	5	5	0	0.4713	-3.20	-1.4051	887	-4.70	0
FBgn0023097	FBtr0300617	0.4504	5	5	3	0.4624	-10.10	3.5458	705	-4.10	0
FBgn0023129	FBtr0076457	0.7436	0	0	0	0.4411	-2.50	1.4028	297	-7.00	0
FBgn0023130	FBtr0070279	0.2858	3	3	1	0.5852	-8.50	1.4934	352	-6.70	1
FBgn0023143	FBtr0088499	0.7404	0	0	0	0.5035	-4.50	-0.9513	288	-7.50	0
FBgn0023167	FBtr0087986	1.1685	0	0	0	0.3904	-1.20	1.5679	146	-3.00	0
FBgn0023169	FBtr0070216	1.5325	0	0	0	0.5243	-9.40	0.4023	267	-20.20	0
FBgn0023170	FBtr0072185	0.4371	0	0	0	0.4390	NA	2.8459	41	NA	0
FBgn0023171	FBtr0088883	1.4970	0	0	0	0.2903	NA	-0.1056	31	NA	NA
FBgn0023172	FBtr0086969	0.9177	4	4	4	0.4144	-3.80	-1.6713	473	-4.40	0
FBgn0023174	FBtr0075629	2.5854	0	0	0	0.3248	-1.20	0.9651	117	-3.40	0
FBgn0023175	FBtr0089998	1.6025	0	0	0	0.3866	-3.00	-0.3132	119	-1.20	0
FBgn0023177	FBtr0077324	2.5693	1	1	1	0.5378	-13.20	1.1328	251	-4.20	0
FBgn0023180	FBtr0088482	2.5116	1	1	1	0.3736	-7.70	1.9709	91	-6.20	0
FBgn0023181	FBtr0072425	0.2028	0	0	0	0.4098	-6.90	1.8688	122	-6.40	0
FBgn0023212	FBtr0083947	1.5110	0	0	0	0.5761	-3.30	1.9637	394	-6.20	0
FBgn0023213	FBtr0089243	2.5223	5	5	4	0.3184	-7.30	0.0326	380	-12.40	0
FBgn0023214	FBtr0086652	0.4789	1	1	0	0.3916	-4.60	1.9608	618	-6.50	0
FBgn0023215	FBtr0301823	0.2169	1	0	0	0.3720	-7.20	-1.9970	793	-3.40	0
FBgn0023216	FBtr0307279	0.8652	0	0	0	0.4959	-6.40	0.4725	121	-0.90	0
FBgn0023388	FBtr0081503	0.3046	2	2	1	0.3904	-5.10	3.5482	333	-7.40	1
FBgn0023395	FBtr0074998	0.7176	0	0	0	0.3816	-0.20	-0.1139	76	-2.50	0
FBgn0023407	FBtr0080513	1.0636	12	12	10	0.5134	-6.60	-1.2796	748	-8.20	0
FBgn0023441	FBtr0087346	0.1966	4	3	1	0.3821	-4.90	3.2651	602	-8.50	0
FBgn0023458	FBtr0303341	0.4908	3	3	2	0.3741	-6.40	-0.2741	139	-0.80	0
FBgn0023477	FBtr0072141	0.9159	0	0	0	0.4000	NA	0.1791	20	NA	NA
FBgn0023496	FBtr0080124	0.0972	0	0	0	0.4807	-3.20	1.1276	181	-8.90	0
FBgn0023506	FBtr0071198	1.6560	0	0	0	0.3152	-0.90	0.5777	92	-2.20	0
FBgn0023507	FBtr0070381	0.7436	2	2	1	0.4863	0.00	1.8157	183	-6.00	0
FBgn0023508	FBtr0070317	1.4674	3	3	3	0.5444	-2.70	0.5102	777	-6.80	1
FBgn0023509	FBtr0070315	1.5168	0	0	0	0.3860	-3.00	-3.0277	114	-4.90	0
FBgn0023510	FBtr0070316	0.1247	3	3	2	0.5039	-6.00	3.0033	647	-5.60	1
FBgn0023511	FBtr0070353	1.1231	1	1	0	0.4717	-1.20	0.8307	53	-8.30	0
FBgn0023512	FBtr0070351	1.2487	0	0	0	0.4706	-6.30	1.6409	51	-6.50	0
FBgn0023513	FBtr0070310	0.5005	0	0	0	0.4906	-4.40	2.2753	53	-4.40	0
FBgn0023514	FBtr0070312	1.8797	1	1	1	0.3909	-1.40	3.1515	110	-6.70	0
FBgn0023515	FBtr0070369	2.3920	1	1	1	0.4040	-0.10	3.8776	99	-0.40	0
FBgn0023516	FBtr0070368	0.0714	0	0	0	0.4483	-3.50	2.4217	116	-4.50	0
FBgn0023517	FBtr0070366	0.4122	0	0	0	0.2857	NA	0.4817	35	NA	NA
FBgn0023518	FBtr0070362	1.5564	1	1	1	0.5086	-5.80	-2.6330	175	-2.10	0
FBgn0023519	FBtr0332579	0.6876	1	1	0	0.3626	0.00	1.3181	91	-8.50	0
FBgn0023520	FBtr0070349	0.7825	0	0	0	0.3837	-1.80	-1.2087	86	-6.60	0
FBgn0023521	FBtr0070321	1.0039	0	0	0	0.4125	-1.10	-0.1739	80	-9.10	0
FBgn0023522	FBtr0070318	1.3920	1	1	1	0.4951	-2.60	-0.6581	103	-7.60	0
FBgn0023525	FBtr0342768	0.2831	0	0	0	0.6364	NA	-0.7938	22	NA	NA
FBgn0023526	FBtr0070408	0.4505	1	1	0	0.3961	-4.90	2.2933	722	-13.60	0
FBgn0023527	FBtr0070398	0.8386	0	0	0	0.4746	-0.60	0.0474	59	-1.40	0
FBgn0023528	FBtr0345315	3.1139	3	3	2	0.4272	-0.40	2.6904	618	-1.10	0
FBgn0023529	FBtr0300792	0.8669	0	0	0	0.3636	-0.90	0.8478	132	-2.30	0
FBgn0023530	FBtr0070283	1.5703	1	1	0	0.4340	-6.60	0.6292	288	-12.40	0
FBgn0023531	FBtr0308321	0.3292	7	7	3	0.5435	-7.20	0.1260	517	-2.60	0
FBgn0023536	FBtr0070079	0.6613	1	1	1	0.3036	-5.10	2.7725	112	-4.10	0
FBgn0023537	FBtr0070092	0.6368	0	0	0	0.5513	0.00	2.1561	78	-7.20	0
FBgn0023540	FBtr0310501	0.8135	0	0	0	0.5813	-5.10	0.5386	203	-4.60	0
FBgn0023542	FBtr0070425	0.5690	0	0	0	0.4308	-4.10	-2.6444	130	-1.10	0
FBgn0023545	FBtr0070347	1.2137	0	0	0	0.4706	-7.40	1.9626	68	-8.60	0
FBgn0023549	FBtr0070393	0.1361	1	1	0	0.5087	-3.30	3.5964	629	-8.50	0
FBgn0024150	FBtr0305501	0.5961	0	0	0	0.5256	-12.00	0.2575	78	-3.10	0
FBgn0024177	FBtr0076983	0.1917	2	0	0	0.3659	-1.70	1.1495	123	-7.40	0
FBgn0024179	FBtr0073279	0.5915	0	0	0	0.4407	-3.50	1.0921	413	-12.30	0
FBgn0024182	FBtr0100536	0.1217	0	0	0	0.4194	NA	-0.5615	31	NA	NA
FBgn0024183	FBtr0080719	1.1830	0	0	0	0.5310	-1.50	1.6900	145	-8.90	0
FBgn0024187	FBtr0076768	0.1588	4	4	0	0.4321	-2.40	1.3886	641	-4.00	0
FBgn0024188	FBtr0088126	5.3379	0	0	0	0.4370	-2.70	3.1927	119	-6.10	0
FBgn0024189	FBtr0088635	0.6119	0	0	0	0.5469	-4.50	3.3304	576	-8.40	0
FBgn0024191	FBtr0345545	0.8554	1	1	0	0.3882	-2.80	0.4725	85	-4.30	0
FBgn0024194	FBtr0073029	0.0845	0	0	0	0.5263	NA	-1.0393	19	NA	NA
FBgn0024196	FBtr0086920	2.4482	0	0	0	0.3434	-8.60	3.2912	99	-2.30	0
FBgn0024222	FBtr0304804	1.0168	2	2	2	0.3861	-3.80	2.4831	101	-6.90	0
FBgn0024227	FBtr0080180	1.9774	0	0	0	0.2991	0.00	0.9644	117	-0.10	0
FBgn0024230	FBtr0081288	0.0583	3	2	0	0.4656	-7.10	-1.5216	131	-15.20	0
FBgn0024234	FBtr0072127	0.4732	1	1	1	0.4249	-4.70	1.4529	193	-3.90	0
FBgn0024236	FBtr0076624	0.0859	6	2	0	0.4823	-5.50	2.8035	622	-3.00	0
FBgn0024238	FBtr0074441	0.1377	1	1	0	0.3677	-2.50	2.8281	495	-5.50	0
FBgn0024244	FBtr0077531	1.3951	0	0	0	0.5145	-5.80	3.7163	758	-4.20	0
FBgn0024245	FBtr0081224	1.5680	4	4	2	0.4356	-2.90	-3.6117	388	-5.50	0
FBgn0024248	FBtr0303904	3.0232	1	1	1	0.3750	-1.30	1.3085	72	-7.30	0
FBgn0024249	FBtr0087183	0.1738	0	0	0	0.5000	NA	0.1952	38	NA	NA
FBgn0024250	FBtr0071048	0.7273	3	3	1	0.3914	0.00	1.7399	534	-7.00	0
FBgn0024251	FBtr0100599	0.0915	1	1	0	0.3611	-1.30	2.1542	144	-1.10	0
FBgn0024273	FBtr0085352	0.2373	3	3	0	0.5150	0.00	-0.9890	266	-5.20	0
FBgn0024277	FBtr0072644	0.8574	5	5	5	0.4743	-3.80	0.0894	350	-4.70	0
FBgn0024285	FBtr0079875	1.2688	0	0	0	0.4380	-8.60	3.1706	137	-5.90	0
FBgn0024289	FBtr0339932	0.6143	0	0	0	0.3768	-2.50	2.9020	69	-7.20	0
FBgn0024291	FBtr0080434	1.3132	2	2	2	0.4637	-15.40	3.5198	427	-9.90	0
FBgn0024294	FBtr0089041	0.2468	0	0	0	0.5278	NA	1.2853	36	NA	NA
FBgn0024314	FBtr0304710	0.6345	1	1	0	0.4968	-3.50	0.7459	157	-4.00	0
FBgn0024315	FBtr0087114	0.2564	3	2	0	0.4547	0.00	2.1823	750	-9.10	0
FBgn0024320	FBtr0343608	0.7647	2	2	1	0.3705	-1.50	0.4355	278	-3.80	0
FBgn0024321	FBtr0306742	0.3005	0	0	0	0.4387	-5.60	-0.9000	563	-11.20	0
FBgn0024326	FBtr0300443	0.6598	2	2	1	0.4842	-3.70	2.9299	285	-2.20	0
FBgn0024329	FBtr0083684	0.3378	2	2	0	0.4385	-3.70	3.3149	358	-6.40	0
FBgn0024330	FBtr0339719	3.4870	0	0	0	0.4748	-5.50	3.3086	457	-14.50	1
FBgn0024332	FBtr0070762	0.2412	0	0	0	0.4225	-8.40	1.7997	142	-7.60	0
FBgn0024352	FBtr0078131	0.5437	0	0	0	0.4067	-2.60	2.4788	150	-3.30	0
FBgn0024360	FBtr0070236	0.2948	0	0	0	0.5225	-13.60	0.5433	111	-1.20	0
FBgn0024361	FBtr0070211	0.3554	0	0	0	0.5145	-1.00	1.7617	138	-3.30	0
FBgn0024362	FBtr0070209	0.1178	4	1	1	0.4974	-5.30	2.2046	386	-8.50	0
FBgn0024364	FBtr0070212	1.0792	0	0	0	0.5062	-6.00	0.7481	81	-6.90	0
FBgn0024365	FBtr0070235	1.3181	3	3	2	0.5335	-6.00	-0.0433	493	-1.30	0
FBgn0024366	FBtr0342730	0.6155	4	4	4	0.3838	-3.30	-0.2994	284	-5.30	0
FBgn0024371	FBtr0081501	1.9030	3	3	2	0.4286	-5.60	-0.0576	189	0.00	0
FBgn0024432	FBtr0083575	3.9756	0	0	0	0.4301	-5.00	0.7407	193	-4.60	0
FBgn0024491	FBtr0083279	3.4122	0	0	0	0.3333	-1.90	1.4611	120	-5.20	0
FBgn0024509	FBtr0084409	0.6847	0	0	0	0.4951	-7.30	3.1352	103	-5.30	0
FBgn0024510	FBtr0072790	1.4920	0	0	0	0.4140	-2.50	1.0949	215	-6.60	0
FBgn0024542	FBtr0333367	1.7119	0	0	0	0.4138	-3.30	-2.7870	58	-8.10	0
FBgn0024555	FBtr0082817	1.4580	3	3	3	0.4561	-4.10	1.7857	524	-6.80	0
FBgn0024556	FBtr0087670	0.8911	0	0	0	0.4656	-1.90	1.7392	131	-3.20	0
FBgn0024558	FBtr0084280	0.6735	0	0	0	0.5429	-8.50	0.5631	105	-13.40	0
FBgn0024689	FBtr0346627	1.7104	0	0	0	0.3265	-4.80	1.3609	49	-8.40	0
FBgn0024698	FBtr0089258	0.9976	1	1	1	0.4194	-2.10	1.7692	124	-3.00	0
FBgn0024728	FBtr0089090	1.8970	2	2	2	0.2625	-2.30	1.4624	80	-1.40	0
FBgn0024732	FBtr0087978	1.5096	1	1	1	0.4167	-2.60	1.2259	252	-4.50	0
FBgn0024733	FBtr0299869	0.4948	0	0	0	0.4884	-10.70	2.8957	43	-10.70	0
FBgn0024734	FBtr0080856	2.1654	7	7	6	0.3670	-1.10	-4.9147	1365	-7.60	0
FBgn0024754	FBtr0087351	0.3435	0	0	0	0.3590	0.00	2.1649	234	-5.00	0
FBgn0024804	FBtr0113715	4.2340	0	0	0	0.2712	0.00	3.1812	59	-5.30	0
FBgn0024806	FBtr0072520	1.6055	3	3	3	0.3799	-0.90	-0.1777	329	-0.30	0
FBgn0024807	FBtr0077372	1.7167	0	0	0	0.2857	-0.70	3.1629	112	-6.10	0
FBgn0024811	FBtr0089113	3.1393	2	2	2	0.3160	-4.40	1.8311	231	-8.50	0
FBgn0024814	FBtr0300813	0.9933	0	0	0	0.5224	-3.10	1.2757	67	-10.30	0
FBgn0024833	FBtr0082114	2.1175	1	1	1	0.5109	-5.50	1.2847	276	-3.60	0
FBgn0024836	FBtr0300578	0.3393	0	0	0	0.4024	-8.50	-1.7072	594	-3.30	0
FBgn0024841	FBtr0085458	0.3084	0	0	0	0.4697	-1.70	2.2547	66	-4.10	0
FBgn0024846	FBtr0080534	0.6268	1	1	0	0.4498	-2.90	2.6695	209	-5.40	0
FBgn0024887	FBtr0078181	2.9963	0	0	0	0.3778	-1.10	0.7552	90	-5.10	0
FBgn0024889	FBtr0074881	0.6658	1	1	0	0.4911	-2.40	2.2879	112	-2.00	0
FBgn0024909	FBtr0114520	3.5050	0	0	0	0.3855	-3.40	1.3139	83	-3.70	0
FBgn0024912	FBtr0347362	3.6000	0	0	0	0.4231	-6.90	-0.8036	78	-9.00	0
FBgn0024920	FBtr0077679	0.9527	0	0	0	0.3529	-4.90	2.5231	68	-15.80	0
FBgn0024921	FBtr0077000	5.6966	0	0	0	0.3733	-0.40	3.9693	150	-3.60	0
FBgn0024945	FBtr0072483	0.7448	0	0	0	0.5325	-5.20	-2.2587	77	-8.00	0
FBgn0024947	FBtr0332459	1.8550	0	0	0	0.4688	-4.40	1.8408	192	-7.80	0
FBgn0024956	FBtr0088255	0.6811	0	0	0	0.4128	-2.10	0.7428	109	-0.10	0
FBgn0024957	FBtr0082259	0.4479	0	0	0	0.3889	-5.00	1.4791	54	-4.10	0
FBgn0024958	FBtr0084327	1.0571	0	0	0	0.4127	-0.10	2.7507	63	-4.20	0
FBgn0024973	FBtr0070498	0.5377	2	2	0	0.4671	-9.20	1.2079	152	-3.00	0
FBgn0024975	FBtr0070488	0.0528	0	0	0	0.3958	-0.30	-2.1227	96	-6.90	0
FBgn0024980	FBtr0332496	0.2727	0	0	0	0.4726	-8.10	2.3644	237	-3.10	0
FBgn0024983	FBtr0100475	0.6062	0	0	0	0.5049	-11.70	1.4847	206	-6.60	0
FBgn0024984	FBtr0070392	1.9266	0	0	0	0.4805	-2.40	0.7573	77	-6.30	0
FBgn0024985	FBtr0070225	0.0656	2	1	0	0.5122	-9.60	-3.1930	490	-1.10	0
FBgn0024986	FBtr0070233	1.2534	0	0	0	0.4968	-0.70	0.9707	157	-1.60	0
FBgn0024987	FBtr0070215	3.2480	0	0	0	0.4720	-4.60	-1.2912	161	-5.10	0
FBgn0024989	FBtr0070067	0.6350	0	0	0	0.4058	-1.50	2.9444	207	-4.70	0
FBgn0024991	FBtr0310649	0.6145	0	0	0	0.5098	-10.70	0.8058	51	-10.90	0
FBgn0024992	FBtr0070502	0.2805	0	0	0	0.4649	-9.30	1.4529	228	-3.60	0
FBgn0024993	FBtr0345709	0.1733	0	0	0	0.3721	-2.90	-0.3391	86	-1.60	0
FBgn0024994	FBtr0070501	1.0449	0	0	0	0.5111	-5.70	2.3430	225	-3.70	0
FBgn0024996	FBtr0070479	0.3946	1	1	1	0.4286	-0.40	1.8075	147	-1.10	0
FBgn0024998	FBtr0070499	2.8052	0	0	0	0.3836	-2.70	3.1352	219	-3.80	0
FBgn0025109	FBtr0077643	0.7384	2	2	1	0.4651	-9.50	1.7964	129	-5.40	0
FBgn0025117	FBtr0335504	0.4135	0	0	0	0.5000	-7.30	1.9652	94	-7.30	0
FBgn0025185	FBtr0088980	0.4404	0	0	0	0.3519	-6.40	0.9379	54	-3.80	0
FBgn0025186	FBtr0071774	1.6153	4	4	4	0.4967	-5.60	0.8154	606	-5.40	0
FBgn0025286	FBtr0088525	0.2043	0	0	0	0.4583	-7.80	3.0453	72	-11.20	0
FBgn0025335	FBtr0343277	0.1960	0	0	0	0.4412	NA	2.3185	34	NA	NA
FBgn0025336	FBtr0072225	0.5121	1	1	1	0.3253	-1.40	0.9554	83	-3.20	0
FBgn0025352	FBtr0072226	1.3426	0	0	0	0.4231	-5.10	2.0537	78	-3.90	0
FBgn0025355	FBtr0076203	0.7375	6	6	5	0.4431	-3.40	-0.2199	404	-11.30	0
FBgn0025360	FBtr0329885	0.1624	2	1	0	0.5096	-2.60	3.2006	675	-10.50	0
FBgn0025366	FBtr0080017	0.6952	0	0	0	0.3492	-5.80	2.0002	63	-5.60	0
FBgn0025373	FBtr0088170	3.5475	0	0	0	0.3953	-4.20	3.7226	86	-6.90	0
FBgn0025381	FBtr0070259	0.2305	1	1	0	0.5648	-0.70	0.7365	687	-11.80	0
FBgn0025382	FBtr0070294	0.0579	3	1	0	0.5874	-6.00	0.1403	778	-3.50	0
FBgn0025388	FBtr0300754	1.1014	2	2	2	0.3942	-5.50	0.8569	104	-2.90	0
FBgn0025394	FBtr0339590	4.2599	3	3	3	0.5344	-8.90	1.7595	393	-6.70	0
FBgn0025455	FBtr0075205	0.3789	6	6	1	0.5182	-5.80	2.2987	716	-4.80	0
FBgn0025456	FBtr0089897	2.3779	0	0	0	0.4911	-6.50	0.1942	112	-3.70	0
FBgn0025457	FBtr0085465	1.9880	0	0	0	0.3628	-4.30	3.2651	113	-9.60	0
FBgn0025463	FBtr0073741	1.2402	0	0	0	0.4222	-3.70	2.1514	135	-8.10	0
FBgn0025469	FBtr0088824	0.1842	0	0	0	0.4496	-6.90	-0.1446	129	-7.60	0
FBgn0025519	FBtr0087185	0.7036	2	2	0	0.3529	-2.50	-3.3476	119	-3.60	0
FBgn0025525	FBtr0333271	0.4801	0	0	0	0.4187	-1.20	2.6724	406	-7.00	0
FBgn0025549	FBtr0071066	0.9763	6	6	2	0.4211	-0.60	2.6483	767	-7.50	0
FBgn0025558	FBtr0075314	1.7685	0	0	0	0.3333	-11.40	-0.1511	90	-5.60	0
FBgn0025571	FBtr0083456	0.7641	0	0	0	0.4363	-6.00	1.1448	204	-3.70	0
FBgn0025574	FBtr0084527	1.7369	3	3	2	0.4327	-6.40	4.6059	483	-2.20	0
FBgn0025582	FBtr0075345	0.9907	0	0	0	0.4537	-3.20	1.3322	108	-7.00	0
FBgn0025592	FBtr0072529	2.6436	1	1	1	0.4155	-4.20	4.2307	207	-3.30	0
FBgn0025608	FBtr0343115	1.1212	2	2	2	0.5042	-2.90	2.3785	361	-2.10	0
FBgn0025615	FBtr0070690	1.3687	1	1	0	0.4265	-3.60	-5.3049	68	-1.10	0
FBgn0025621	FBtr0070140	0.3030	1	1	1	0.5424	-6.60	-2.5995	330	-5.40	0
FBgn0025624	FBtr0070375	0.4383	0	0	0	0.4872	-2.80	0.2747	117	-2.30	0
FBgn0025626	FBtr0070339	1.2385	2	2	1	0.5166	-6.00	-0.1767	151	-5.70	0
FBgn0025627	FBtr0070328	0.4472	0	0	0	0.3333	NA	1.8451	15	NA	NA
FBgn0025628	FBtr0070337	0.2535	0	0	0	0.5488	-2.50	2.0702	164	-9.80	0
FBgn0025629	FBtr0070331	1.6181	0	0	0	0.4750	-4.70	0.3116	80	-5.10	0
FBgn0025630	FBtr0344156	0.0957	4	4	1	0.5081	-4.40	2.4972	862	-3.10	0
FBgn0025631	FBtr0303045	0.5079	1	1	1	0.4719	-4.20	-0.2432	926	-7.30	0
FBgn0025632	FBtr0340109	0.0398	6	6	2	0.5023	-4.90	-3.8048	444	-3.20	0
FBgn0025633	FBtr0339432	0.6794	4	3	3	0.4922	-1.70	-3.2422	835	-6.50	0
FBgn0025634	FBtr0070121	0.0541	0	0	0	0.3852	-4.20	0.3207	135	-4.40	0
FBgn0025635	FBtr0070118	2.0966	0	0	0	0.4412	-4.70	1.6451	68	-9.20	0
FBgn0025637	FBtr0345314	4.5388	0	0	0	0.3611	NA	2.9182	36	NA	NA
FBgn0025638	FBtr0070122	1.5404	0	0	0	0.4167	-4.30	2.6063	144	-7.70	0
FBgn0025639	FBtr0070151	0.7028	5	5	4	0.4738	-2.70	1.8475	667	-4.30	0
FBgn0025640	FBtr0070115	0.2786	0	0	0	0.5514	-1.70	1.5704	214	-11.90	0
FBgn0025641	FBtr0070239	0.8651	4	4	4	0.5528	-1.80	1.0631	1174	-4.40	0
FBgn0025643	FBtr0301061	0.2423	0	0	0	0.5012	-7.40	0.0711	403	-2.20	0
FBgn0025674	FBtr0085942	0.5585	2	2	2	0.4475	-10.80	-0.1773	219	-2.60	0
FBgn0025676	FBtr0072603	3.1227	0	0	0	0.2712	-2.20	-3.1933	59	-5.30	0
FBgn0025678	FBtr0080837	2.1142	0	0	0	0.3934	-3.30	2.4306	183	-17.40	0
FBgn0025681	FBtr0077644	0.3878	8	8	6	0.4454	0.00	1.6090	595	-3.60	0
FBgn0025682	FBtr0089942	1.7079	0	0	0	0.5370	-7.20	1.7929	54	-4.90	0
FBgn0025683	FBtr0078154	1.2787	0	0	0	0.4885	-4.40	2.7315	262	-12.40	0
FBgn0025684	FBtr0077456	0.7159	4	4	4	0.4663	-3.30	1.2280	208	-12.20	0
FBgn0025687	FBtr0079495	0.2280	0	0	0	0.4800	-1.60	1.9111	125	-5.40	0
FBgn0025692	FBtr0332885	0.3067	0	0	0	0.4808	-7.50	0.5492	104	-7.30	0
FBgn0025693	FBtr0086056	1.4364	5	5	5	0.4086	-1.20	1.5389	301	-9.00	0
FBgn0025700	FBtr0079900	1.0583	0	0	0	0.4421	-2.20	3.5264	95	-6.40	0
FBgn0025702	FBtr0303600	0.3096	2	2	2	0.5131	-16.60	0.1637	573	-11.20	0
FBgn0025709	FBtr0088561	0.5341	0	0	0	0.3979	-0.50	2.5093	191	-3.00	0
FBgn0025712	FBtr0072761	0.1609	0	0	0	0.4820	-5.70	2.1253	305	-8.70	0
FBgn0025716	FBtr0086960	2.2845	0	0	0	0.4309	-2.50	1.6082	123	-8.20	0
FBgn0025720	FBtr0086317	0.4445	2	2	2	0.3519	-2.60	1.7157	108	-9.40	0
FBgn0025724	FBtr0080469	1.6413	0	0	0	0.4750	-8.60	0.3588	120	-3.30	0
FBgn0025725	FBtr0072811	1.6596	0	0	0	0.4701	-4.70	1.6625	134	-4.40	0
FBgn0025726	FBtr0089245	3.3515	11	11	11	0.3254	-5.50	2.8019	590	-1.70	0
FBgn0025739	FBtr0070681	0.1552	1	1	0	0.3556	-3.40	0.7287	135	-4.90	0
FBgn0025740	FBtr0308297	8.3646	7	7	7	0.2797	0.00	1.7826	354	-2.40	0
FBgn0025741	FBtr0089225	2.8423	4	4	4	0.3493	-5.70	-0.7085	229	-5.70	0
FBgn0025742	FBtr0079223	1.2150	1	1	0	0.4245	-2.10	2.4576	106	-7.10	0
FBgn0025743	FBtr0074285	1.5653	4	4	2	0.4753	-10.30	0.7623	507	-0.20	0
FBgn0025776	FBtr0333875	0.9307	0	0	0	0.4500	-1.00	2.1561	60	-8.60	0
FBgn0025777	FBtr0079307	2.7249	1	1	1	0.4917	-4.50	0.5260	120	-4.10	0
FBgn0025781	FBtr0084377	2.6052	2	2	1	0.3111	0.00	3.3212	90	-4.60	0
FBgn0025790	FBtr0089627	0.9155	1	1	1	0.4244	-2.40	1.4104	344	-3.30	0
FBgn0025800	FBtr0340159	0.0896	1	0	0	0.5165	-8.60	-0.6278	879	-5.50	1
FBgn0025802	FBtr0082530	0.6389	1	1	0	0.4756	-9.10	2.1957	164	-1.90	0
FBgn0025806	FBtr0072177	2.7480	2	2	2	0.3505	0.00	2.0002	388	-1.50	0
FBgn0025807	FBtr0112917	0.3700	0	0	0	0.3478	-7.50	-1.8279	69	-9.80	0
FBgn0025808	FBtr0082974	0.6068	0	0	0	0.3125	-2.80	3.1991	48	-2.30	0
FBgn0025809	FBtr0074190	2.9701	6	6	6	0.3843	-7.00	2.5165	523	-5.00	0
FBgn0025814	FBtr0077243	1.4539	0	0	0	0.3400	-2.60	1.5245	100	-10.60	0
FBgn0025815	FBtr0070952	0.5272	0	0	0	0.4622	-2.30	3.8776	119	-3.40	0
FBgn0025820	FBtr0332876	1.1262	0	0	0	0.4466	-4.50	2.3754	103	-4.30	0
FBgn0025825	FBtr0078767	1.5084	2	2	2	0.5162	-7.30	0.1217	277	-5.90	0
FBgn0025830	FBtr0087036	0.9228	0	0	0	0.4086	-8.50	0.4939	93	-5.60	0
FBgn0025832	FBtr0087075	0.3070	0	0	0	0.3175	-1.00	1.6509	126	-6.60	0
FBgn0025836	FBtr0112920	2.1909	3	3	3	0.3651	-11.30	3.5979	304	-3.10	0
FBgn0025839	FBtr0070386	1.0688	0	0	0	0.3419	-2.30	1.5687	117	-1.90	0
FBgn0025864	FBtr0071219	1.7856	3	3	3	0.4766	-7.10	1.2433	577	-8.00	0
FBgn0025865	FBtr0084039	1.3293	2	2	0	0.4158	-2.30	1.6186	190	-2.90	0
FBgn0025866	FBtr0304675	2.3488	0	0	0	0.4333	-5.90	3.3411	180	-5.00	0
FBgn0025874	FBtr0075791	0.8036	0	0	0	0.4384	-5.70	-2.2615	73	-5.20	0
FBgn0025878	FBtr0071821	0.3114	0	0	0	0.3939	-0.80	2.8711	165	-10.00	0
FBgn0025885	FBtr0089329	0.3200	0	0	0	0.4891	-3.60	1.4940	137	-5.70	0
FBgn0025936	FBtr0089082	2.7480	2	2	2	0.3172	-0.60	4.2765	331	-1.90	0
FBgn0026015	FBtr0070930	0.3047	4	4	1	0.4788	-6.00	-0.8526	259	-5.90	0
FBgn0026056	FBtr0084002	0.1063	1	1	0	0.3511	-3.00	-0.1217	94	-7.80	0
FBgn0026059	FBtr0083232	0.2659	0	0	0	0.5833	NA	1.1743	24	NA	NA
FBgn0026060	FBtr0070884	0.8116	0	0	0	0.4181	-3.50	1.4191	177	-5.10	0
FBgn0026061	FBtr0345813	0.5293	0	0	0	0.4470	-0.80	-1.2784	132	-5.10	0
FBgn0026063	FBtr0301427	0.0013	42	41	14	0.5464	-8.50	1.7944	2943	-5.20	0
FBgn0026064	FBtr0301426	0.5431	9	8	4	0.5330	-4.60	0.8541	636	-5.20	0
FBgn0026076	FBtr0300787	0.2638	13	12	3	0.3685	0.00	0.3409	483	-5.80	0
FBgn0026077	FBtr0078619	0.3792	0	0	0	0.4519	-0.50	3.2172	135	-5.30	0
FBgn0026079	FBtr0070669	1.1806	0	0	0	0.3846	-3.70	0.1131	130	-13.30	0
FBgn0026080	FBtr0333186	1.4312	0	0	0	0.3608	-2.70	0.4880	97	-6.00	0
FBgn0026083	FBtr0070643	0.7520	6	6	4	0.4941	-5.80	1.6930	595	-1.50	0
FBgn0026084	FBtr0070639	3.7632	0	0	0	0.4783	0.00	3.4923	161	-4.30	0
FBgn0026085	FBtr0070642	0.8318	0	0	0	0.4302	-5.40	1.3842	86	-10.40	0
FBgn0026086	FBtr0305497	1.2834	8	8	7	0.4542	0.00	-0.5537	502	-7.40	0
FBgn0026088	FBtr0070364	2.2863	0	0	0	0.4000	-6.80	1.9393	90	-0.70	0
FBgn0026089	FBtr0345510	2.4073	0	0	0	0.3282	-4.90	3.6466	131	-6.80	0
FBgn0026090	FBtr0333511	0.9622	0	0	0	0.4348	-5.80	-2.4593	69	-0.10	0
FBgn0026143	FBtr0070182	0.2681	2	2	2	0.4934	-5.50	2.0745	229	-4.50	0
FBgn0026144	FBtr0071052	2.5926	1	1	1	0.3379	-2.80	4.6059	364	-5.90	0
FBgn0026147	FBtr0300402	0.2827	1	1	1	0.4486	-9.40	-1.8124	535	-2.30	0
FBgn0026148	FBtr0080149	0.4939	0	0	0	0.4138	NA	2.8543	29	NA	NA
FBgn0026149	FBtr0071358	2.7011	0	0	0	0.4476	-5.60	1.6156	286	-0.80	0
FBgn0026150	FBtr0080956	3.1656	1	1	1	0.3212	-3.70	3.3763	137	-4.30	0
FBgn0026160	FBtr0076267	0.1926	5	4	1	0.3424	-6.60	-1.1452	733	-9.10	0
FBgn0026175	FBtr0074797	1.1280	0	0	0	0.4091	-4.00	2.4576	66	-5.60	0
FBgn0026176	FBtr0088020	2.2367	0	0	0	0.4372	-4.70	0.0406	247	-5.20	0
FBgn0026179	FBtr0078289	0.2024	1	1	0	0.4766	-2.30	2.2184	384	-7.90	0
FBgn0026181	FBtr0340153	0.4158	0	0	0	0.5054	-7.40	-3.7293	93	-3.70	0
FBgn0026189	FBtr0073118	2.2472	3	3	3	0.5139	-6.50	-0.1923	360	-4.20	0
FBgn0026192	FBtr0074456	1.1615	0	0	0	0.4682	-7.90	2.2465	299	-9.50	0
FBgn0026196	FBtr0079369	0.1806	1	1	0	0.4015	-1.80	0.5820	132	-3.30	0
FBgn0026197	FBtr0110845	0.0000	0	0	0	0.5506	-7.10	-2.4990	158	-11.60	0
FBgn0026199	FBtr0089092	3.0751	5	5	5	0.2876	-2.50	0.7307	386	-3.10	0
FBgn0026206	FBtr0340341	0.4549	2	2	1	0.4691	-5.00	1.6254	501	-9.30	0
FBgn0026207	FBtr0082668	1.9979	0	0	0	0.4314	-5.20	0.8332	51	-5.20	0
FBgn0026238	FBtr0309847	5.4873	3	3	3	0.4091	-1.60	2.5335	286	-2.70	0
FBgn0026239	FBtr0089768	0.1542	3	2	0	0.5135	-5.90	-0.3300	481	-3.70	0
FBgn0026250	FBtr0083572	0.7276	0	0	0	0.4663	-4.80	3.2888	163	-5.10	0
FBgn0026252	FBtr0076685	1.6594	0	0	0	0.4828	-0.40	3.8729	261	-6.60	0
FBgn0026257	FBtr0084559	0.7981	2	2	2	0.2991	-1.00	0.3710	107	-4.90	0
FBgn0026259	FBtr0073144	1.3022	0	0	0	0.5457	-6.80	1.3337	361	-6.20	0
FBgn0026261	FBtr0071860	0.7478	0	0	0	0.3373	-2.70	-1.9642	83	-4.30	0
FBgn0026262	FBtr0089110	2.9575	1	1	1	0.3585	-4.50	2.1542	159	-3.10	0
FBgn0026263	FBtr0302329	0.1441	0	0	0	0.5057	-5.90	-0.1082	176	-3.40	0
FBgn0026309	FBtr0089549	0.1093	0	0	0	0.4265	-3.00	0.4860	68	-1.30	0
FBgn0026313	FBtr0074451	0.4622	3	3	3	0.5073	-6.10	0.5386	205	-2.70	0
FBgn0026315	FBtr0082374	2.4068	0	0	0	0.5500	NA	-0.5745	40	NA	0
FBgn0026316	FBtr0089553	2.0516	0	0	0	0.4968	-0.90	2.2389	308	-2.70	0
FBgn0026317	FBtr0084546	1.8532	2	2	2	0.4701	-1.50	0.3289	268	-8.30	0
FBgn0026319	FBtr0077429	0.5642	2	2	0	0.3993	0.00	2.6660	283	-8.70	0
FBgn0026320	FBtr0075620	0.7463	0	0	0	0.3735	0.00	3.1240	83	-3.30	0
FBgn0026323	FBtr0077319	2.0175	9	9	8	0.4901	-4.00	0.6676	961	-7.50	0
FBgn0026324	FBtr0077735	4.2442	0	0	0	0.3676	-4.40	-2.8798	68	-0.40	0
FBgn0026326	FBtr0088599	2.3431	0	0	0	0.2870	-0.40	2.4983	108	-0.70	0
FBgn0026361	FBtr0088876	1.5189	2	2	2	0.4670	-8.70	2.5386	212	-8.80	0
FBgn0026369	FBtr0071641	0.3713	1	1	1	0.3690	-2.70	-0.1506	187	-2.30	0
FBgn0026370	FBtr0087383	0.3770	2	0	0	0.4754	-1.70	2.5908	366	-5.50	0
FBgn0026371	FBtr0078387	2.8992	1	1	1	0.3529	-4.80	-1.2719	136	-2.90	0
FBgn0026372	FBtr0072805	0.0794	0	0	0	0.2857	NA	1.5612	28	NA	NA
FBgn0026373	FBtr0080544	1.5119	0	0	0	0.4023	-0.60	1.3678	87	-4.20	0
FBgn0026374	FBtr0074095	0.2623	0	0	0	0.4423	-5.90	1.9001	104	-8.30	0
FBgn0026375	FBtr0074481	1.8379	1	1	1	0.3243	-4.50	2.1514	74	-3.20	0
FBgn0026376	FBtr0075793	0.7982	7	7	6	0.4624	-0.70	-0.9155	772	-13.30	0
FBgn0026378	FBtr0086462	2.1551	0	0	0	0.3504	-0.10	1.5286	137	-9.70	0
FBgn0026379	FBtr0300562	1.2359	21	21	20	0.3568	-1.30	2.2907	911	-6.10	0
FBgn0026380	FBtr0082010	2.3212	0	0	0	0.4258	-4.70	2.0402	155	-2.80	0
FBgn0026393	FBtr0088887	0.0092	0	0	0	0.3934	-0.60	-2.8687	61	-1.80	0
FBgn0026400	FBtr0085320	0.6448	0	0	0	0.4627	-5.00	2.8980	67	-7.40	0
FBgn0026401	FBtr0301456	4.4389	2	2	2	0.3194	-5.20	0.9134	263	-7.50	0
FBgn0026402	FBtr0087058	0.7424	0	0	0	0.2747	-0.90	0.2366	91	-2.40	0
FBgn0026403	FBtr0339459	0.3796	1	1	1	0.4491	-4.30	2.3648	383	-9.80	0
FBgn0026404	FBtr0076347	2.2463	0	0	0	0.4694	-8.90	-0.1595	409	-1.10	0
FBgn0026409	FBtr0075718	0.8974	0	0	0	0.5125	-2.20	2.9344	80	-3.60	0
FBgn0026411	FBtr0071279	0.2138	0	0	0	0.5000	-6.10	-3.9667	798	-7.00	0
FBgn0026415	FBtr0071393	2.2530	1	1	1	0.4186	-1.60	1.0610	43	-1.60	0
FBgn0026417	FBtr0078876	2.5505	0	0	0	0.4264	-2.70	2.7315	129	-5.60	0
FBgn0026418	FBtr0075771	0.7645	0	0	0	0.3979	-6.70	3.2757	284	-8.40	0
FBgn0026427	FBtr0087502	2.2269	5	5	5	0.4246	-5.30	-0.4677	252	-5.50	0
FBgn0026428	FBtr0307383	0.1015	0	0	0	0.5517	-4.20	-0.1759	145	-7.50	0
FBgn0026430	FBtr0074777	0.4539	2	1	0	0.5230	-5.50	-2.7785	457	-1.50	0
FBgn0026431	FBtr0080033	1.0878	1	1	1	0.3968	-0.80	2.9773	63	-7.30	0
FBgn0026432	FBtr0076061	1.3031	2	2	2	0.3636	-4.60	-1.5024	88	-10.60	0
FBgn0026433	FBtr0074075	0.0835	0	0	0	0.4250	-0.10	2.9202	80	-8.40	0
FBgn0026441	FBtr0334695	1.6067	3	3	3	0.4315	-4.20	0.1194	197	-7.70	0
FBgn0026479	FBtr0077744	0.9507	1	1	0	0.4843	-0.80	1.8496	159	-7.00	0
FBgn0026533	FBtr0100436	2.7576	1	1	1	0.4074	-4.80	1.9835	81	-6.80	0
FBgn0026562	FBtr0085094	0.3508	0	0	0	0.4773	-3.30	0.7573	88	-6.10	0
FBgn0026566	FBtr0301623	1.1221	0	0	0	0.4623	-6.30	2.7600	106	-5.60	0
FBgn0026570	FBtr0346076	1.9999	3	3	3	0.3280	-1.80	1.6210	125	-5.90	0
FBgn0026573	FBtr0088042	1.5647	0	0	0	0.4493	-7.20	-0.3995	296	-5.30	0
FBgn0026575	FBtr0343571	2.8710	4	4	4	0.4566	-1.80	3.6665	449	-3.90	0
FBgn0026576	FBtr0084537	1.1409	1	1	1	0.4672	-9.30	2.9489	366	-8.20	0
FBgn0026577	FBtr0331677	1.6462	3	2	2	0.4583	-9.40	3.5264	240	-3.10	0
FBgn0026582	FBtr0071573	2.2229	1	1	1	0.3265	-1.00	2.5465	98	-2.30	0
FBgn0026593	FBtr0072912	1.6427	0	0	0	0.4026	-2.70	2.8948	231	-4.60	0
FBgn0026597	FBtr0085554	0.6757	14	14	14	0.4677	-8.30	-1.5711	1456	-5.60	0
FBgn0026598	FBtr0084552	2.1191	2	2	2	0.4856	-8.60	0.6844	208	-9.20	0
FBgn0026602	FBtr0089050	0.0305	1	0	0	0.4568	-4.90	1.5245	475	-3.30	0
FBgn0026616	FBtr0083179	1.6450	5	5	5	0.4459	-4.80	-0.5659	453	-7.70	0
FBgn0026619	FBtr0087862	0.9402	5	5	1	0.4579	-3.00	1.9626	356	-7.20	0
FBgn0026620	FBtr0302614	2.9568	2	2	2	0.4393	-9.90	-0.2014	173	-4.60	0
FBgn0026630	FBtr0075020	0.7996	0	0	0	0.3902	NA	0.0969	41	NA	0
FBgn0026634	FBtr0083114	0.3416	0	0	0	0.3625	-3.60	-0.0759	80	-5.70	0
FBgn0026666	FBtr0074084	0.4058	0	0	0	0.3737	-2.70	-1.6516	99	-6.60	0
FBgn0026679	FBtr0071234	1.0947	0	0	0	0.4458	-2.20	2.2229	83	-9.00	0
FBgn0026702	FBtr0070782	0.0672	1	0	0	0.4868	-4.30	-1.5976	76	-2.80	0
FBgn0026713	FBtr0073900	0.6677	1	1	1	0.5149	-1.40	0.8303	101	-4.80	0
FBgn0026718	FBtr0079703	0.0556	2	0	0	0.4293	-4.10	3.5023	403	-6.00	0
FBgn0026721	FBtr0086975	0.3430	0	0	0	0.4639	-3.40	-0.0583	97	-8.60	0
FBgn0026722	FBtr0088850	0.4351	0	0	0	0.4023	-3.00	0.6959	87	-5.80	0
FBgn0026737	FBtr0112926	1.3849	2	2	2	0.2472	-0.50	2.1689	89	-4.60	0
FBgn0026738	FBtr0075605	0.2738	0	0	0	0.2716	-0.30	2.9704	81	-3.60	0
FBgn0026741	FBtr0087852	0.6057	0	0	0	0.3833	-2.70	3.3149	120	-5.60	0
FBgn0026749	FBtr0073789	3.7455	0	0	0	0.4765	-9.60	3.3747	340	-4.50	0
FBgn0026751	FBtr0070763	2.4312	3	3	3	0.4071	-5.50	1.5638	226	-2.10	0
FBgn0026753	FBtr0083804	0.7433	0	0	0	0.4141	-1.70	0.0708	99	-8.10	0
FBgn0026761	FBtr0336666	0.6183	1	1	0	0.3900	-2.90	2.8845	100	-7.90	0
FBgn0026777	FBtr0089122	4.5082	3	3	3	0.3588	-1.50	2.3609	131	-5.00	0
FBgn0026778	FBtr0077747	0.4053	2	2	2	0.4935	-5.90	-0.3228	612	-3.00	0
FBgn0026787	FBtr0301452	0.4452	1	1	1	0.3556	-6.00	3.5435	90	-3.70	0
FBgn0026869	FBtr0089106	3.8310	12	12	12	0.3951	-2.60	-1.4890	577	-4.90	0
FBgn0026872	FBtr0070253	0.0476	1	1	0	0.5544	-1.90	-0.5468	193	-3.20	0
FBgn0026873	FBtr0070308	0.7178	1	1	1	0.3143	0.00	-1.5484	105	-0.50	0
FBgn0026876	FBtr0070245	0.0253	1	1	0	0.3529	-0.10	2.2547	102	-2.40	0
FBgn0026879	FBtr0070159	2.0932	0	0	0	0.4151	-0.90	-0.6792	53	-2.80	0
FBgn0027052	FBtr0080027	6.8906	2	2	2	0.3986	-5.20	0.7272	291	-4.50	0
FBgn0027053	FBtr0083292	1.4634	0	0	0	0.3500	-1.40	3.7318	80	-3.60	0
FBgn0027054	FBtr0301230	1.4156	0	0	0	0.3415	NA	0.9143	41	NA	0
FBgn0027055	FBtr0078269	2.2370	0	0	0	0.3839	-1.30	2.4722	112	-1.20	0
FBgn0027057	FBtr0075074	2.4205	0	0	0	0.3382	-3.90	0.1217	136	-4.70	0
FBgn0027066	FBtr0086127	5.2983	0	0	0	0.4872	-4.80	3.9273	195	-11.70	0
FBgn0027070	FBtr0081105	1.0512	1	0	0	0.5690	-3.90	1.4138	58	-9.60	0
FBgn0027073	FBtr0071625	0.4678	0	0	0	0.4925	-7.50	4.0979	67	-8.10	0
FBgn0027079	FBtr0087735	1.5323	0	0	0	0.3220	-9.60	2.5671	59	-0.50	0
FBgn0027080	FBtr0075410	0.3750	0	0	0	0.3729	-5.80	4.2307	59	-9.20	0
FBgn0027081	FBtr0080331	0.9928	1	1	1	0.3871	-4.10	2.7552	93	-3.80	0
FBgn0027082	FBtr0072948	0.3613	1	1	1	0.2843	0.00	2.8019	102	-3.60	0
FBgn0027083	FBtr0337021	1.5893	0	0	0	0.2262	-1.00	-1.1091	84	-1.50	0
FBgn0027084	FBtr0071366	0.3844	1	0	0	0.4776	-2.20	1.8993	134	-6.80	0
FBgn0027085	FBtr0073348	0.5142	1	1	1	0.3500	-3.50	-0.2859	100	-8.10	0
FBgn0027086	FBtr0078500	1.4863	0	0	0	0.5000	-4.90	1.2259	78	-9.20	0
FBgn0027087	FBtr0074593	0.5671	0	0	0	0.4938	-7.80	-0.1427	162	-7.50	0
FBgn0027088	FBtr0075632	0.4731	0	0	0	0.5276	-2.00	1.1601	290	-5.60	0
FBgn0027090	FBtr0084866	0.5676	0	0	0	0.4894	-6.30	1.1187	47	-2.70	0
FBgn0027091	FBtr0087234	0.6024	0	0	0	0.4382	-4.50	0.3926	89	-5.50	0
FBgn0027093	FBtr0074178	0.4011	1	0	0	0.4219	-0.40	2.2817	64	-9.30	0
FBgn0027094	FBtr0079721	1.3264	0	0	0	0.4421	-3.40	2.0293	95	-8.10	0
FBgn0027095	FBtr0083283	1.9689	1	1	1	0.3925	-0.50	4.2765	107	-1.90	0
FBgn0027101	FBtr0100404	2.0776	9	9	9	0.2985	0.00	0.6827	412	-6.30	0
FBgn0027106	FBtr0071035	0.3604	0	0	0	0.5327	-2.60	0.9856	199	-11.20	0
FBgn0027108	FBtr0071005	1.4941	2	2	2	0.5011	-1.80	3.6665	457	-4.60	0
FBgn0027111	FBtr0072504	0.9086	0	0	0	0.4574	-6.60	1.5909	129	-7.90	0
FBgn0027259	FBtr0073541	3.3898	0	0	0	0.4091	-4.70	0.7584	44	-3.90	0
FBgn0027279	FBtr0299522	0.9186	2	2	2	0.4086	-3.00	1.0662	487	-3.90	0
FBgn0027280	FBtr0071129	2.3250	0	0	0	0.4483	-2.50	0.3546	232	-8.50	0
FBgn0027287	FBtr0074042	0.2761	0	0	0	0.3875	-10.30	1.1067	320	-1.50	0
FBgn0027291	FBtr0074780	0.2410	0	0	0	0.4685	-5.70	2.3034	111	-12.30	0
FBgn0027296	FBtr0070414	2.0313	5	5	4	0.4906	-2.00	-2.0714	479	-7.00	0
FBgn0027329	FBtr0074086	1.0391	0	0	0	0.4228	-4.50	0.3878	123	-2.20	0
FBgn0027330	FBtr0071280	0.9266	0	0	0	0.4286	-6.60	0.4149	112	-4.00	0
FBgn0027334	FBtr0077298	1.3215	0	0	0	0.4831	-4.10	2.2753	89	-5.60	0
FBgn0027335	FBtr0343019	0.6262	0	0	0	0.4582	-5.30	-0.1270	347	-5.00	0
FBgn0027338	FBtr0082106	1.6899	1	1	0	0.3644	-2.50	3.8950	225	-3.90	0
FBgn0027341	FBtr0113687	0.5201	0	0	0	0.3987	0.00	3.7226	153	-6.10	0
FBgn0027342	FBtr0071018	0.0606	3	1	1	0.4571	-3.10	1.6162	700	-9.60	0
FBgn0027343	FBtr0070138	0.0387	1	0	0	0.4532	-4.90	1.7953	203	-6.70	0
FBgn0027348	FBtr0080590	0.4840	0	0	0	0.4199	0.00	2.6414	181	-5.20	0
FBgn0027356	FBtr0087828	0.3732	0	0	0	0.4293	-3.40	-2.4826	396	-5.20	0
FBgn0027358	FBtr0074767	1.1458	0	0	0	0.4018	-2.80	-2.3294	112	-5.10	0
FBgn0027359	FBtr0343640	1.5246	1	1	0	0.3956	-6.40	1.2084	91	-3.10	0
FBgn0027360	FBtr0071676	0.5782	3	3	0	0.5357	0.00	2.9299	280	-7.60	0
FBgn0027363	FBtr0080143	2.8209	0	0	0	0.4214	-8.60	3.1171	299	-0.70	0
FBgn0027364	FBtr0078275	0.4042	0	0	0	0.2836	-7.80	-0.4347	67	0.00	0
FBgn0027375	FBtr0075715	0.3604	1	1	1	0.3511	-5.10	-0.4918	94	-8.20	0
FBgn0027378	FBtr0083125	1.9099	0	0	0	0.3947	-1.00	3.2006	76	-7.60	0
FBgn0027453	FBtr0080181	0.5008	3	3	1	0.5137	-3.30	1.6210	366	-2.40	1
FBgn0027490	FBtr0079707	0.0533	1	0	0	0.5105	-9.00	-0.9060	190	-5.90	0
FBgn0027491	FBtr0080063	0.2114	3	3	1	0.3856	0.00	1.7074	236	-1.20	0
FBgn0027492	FBtr0085203	1.4890	9	9	9	0.4925	-3.00	2.1277	1204	-4.90	0
FBgn0027493	FBtr0083991	1.0031	1	1	0	0.5522	-9.10	0.5607	134	-10.50	0
FBgn0027494	FBtr0085194	3.7706	0	0	0	0.3421	-2.00	2.5373	76	-2.80	0
FBgn0027495	FBtr0087983	3.2227	0	0	0	0.4813	-1.60	0.9366	320	-6.60	0
FBgn0027496	FBtr0079261	1.5793	0	0	0	0.3564	-3.20	2.8803	101	-5.50	0
FBgn0027497	FBtr0078722	0.2832	3	0	0	0.5684	-10.40	-1.1800	475	-7.40	0
FBgn0027498	FBtr0073429	1.4773	1	1	0	0.5000	-9.00	-0.1515	374	-4.20	0
FBgn0027499	FBtr0339467	1.4327	1	1	1	0.2967	-2.70	3.9293	91	-1.20	0
FBgn0027500	FBtr0075363	0.1509	0	0	0	0.4583	-5.40	0.8660	48	-3.30	0
FBgn0027503	FBtr0081959	0.9467	1	1	1	0.3964	-6.70	-3.0112	169	-1.50	0
FBgn0027504	FBtr0088017	0.4875	5	5	5	0.4085	-5.10	0.7821	306	-8.70	0
FBgn0027505	FBtr0080301	1.5859	0	0	0	0.4286	NA	-0.2801	28	NA	NA
FBgn0027506	FBtr0086958	2.1731	2	2	2	0.4424	-3.20	3.3149	486	-6.60	0
FBgn0027507	FBtr0086034	2.0918	0	0	0	0.4516	NA	-0.3190	31	NA	NA
FBgn0027508	FBtr0084890	2.1146	2	2	2	0.5110	-6.60	3.3304	499	-0.80	0
FBgn0027509	FBtr0077829	1.2190	0	0	0	0.4341	-9.60	0.3101	129	-8.80	0
FBgn0027512	FBtr0084476	0.1154	1	1	0	0.4074	-4.40	1.4801	108	0.00	0
FBgn0027513	FBtr0339310	0.2988	0	0	0	0.4066	-0.10	-0.0675	91	-7.60	0
FBgn0027514	FBtr0290212	2.4185	1	1	0	0.3580	-3.20	1.9393	176	-1.40	0
FBgn0027515	FBtr0079523	1.0304	5	5	1	0.4387	-3.90	-2.1863	604	-1.40	0
FBgn0027518	FBtr0330297	0.0590	0	0	0	0.4301	-10.90	-0.2754	93	-2.60	0
FBgn0027521	FBtr0074222	4.8218	1	1	1	0.3500	-4.40	1.1067	120	-1.20	0
FBgn0027524	FBtr0082172	1.1093	0	0	0	0.3506	-1.00	2.2954	77	-7.40	0
FBgn0027525	FBtr0088245	0.2198	1	1	0	0.4103	-0.10	1.6640	78	-7.90	0
FBgn0027526	FBtr0084347	2.4595	1	1	1	0.3234	-4.60	1.6792	167	-1.20	0
FBgn0027527	FBtr0078596	0.6627	0	0	0	0.4286	NA	-2.5464	28	NA	NA
FBgn0027528	FBtr0074359	2.5101	6	6	6	0.3748	-6.90	2.3034	523	-4.50	0
FBgn0027529	FBtr0301207	0.3279	1	1	0	0.3693	-5.00	2.8174	176	-3.70	0
FBgn0027532	FBtr0078486	1.6873	5	5	4	0.4779	-2.20	1.0431	226	-3.70	0
FBgn0027535	FBtr0086579	0.7775	2	2	1	0.4752	-2.00	-0.7636	101	-6.80	0
FBgn0027537	FBtr0073828	1.4349	0	0	0	0.5050	-4.40	1.7730	101	-11.60	0
FBgn0027538	FBtr0087539	0.0202	0	0	0	0.4925	-8.40	-0.0576	134	-4.00	0
FBgn0027539	FBtr0084739	0.9281	4	4	2	0.4171	-6.50	-1.2807	362	-4.30	0
FBgn0027547	FBtr0072853	1.1088	2	2	2	0.4156	-1.80	0.8680	462	-0.80	0
FBgn0027548	FBtr0339122	2.5347	0	0	0	0.4419	-8.20	-2.9114	215	-5.80	0
FBgn0027549	FBtr0334615	1.7417	0	0	0	0.4427	-5.90	-0.2492	131	-10.10	0
FBgn0027550	FBtr0080114	0.2997	0	0	0	0.4538	-3.04	2.5908	390	-5.90	0
FBgn0027552	FBtr0073171	0.9085	0	0	0	0.5455	NA	2.5528	33	NA	NA
FBgn0027553	FBtr0071077	0.5521	0	0	0	0.4103	-4.40	-3.5310	78	-5.30	0
FBgn0027554	FBtr0076766	2.8473	0	0	0	0.4000	-1.60	2.4706	90	-4.70	0
FBgn0027556	FBtr0074344	1.0899	0	0	0	0.4184	-3.10	2.8058	1121	-10.70	0
FBgn0027558	FBtr0089061	1.0333	4	4	4	0.4920	-5.90	1.9519	376	-2.70	0
FBgn0027559	FBtr0303164	0.1702	0	0	0	0.3171	NA	2.3378	41	NA	0
FBgn0027560	FBtr0077431	0.4288	0	0	0	0.4799	-2.70	1.6090	398	-8.70	0
FBgn0027561	FBtr0088626	0.5271	3	3	3	0.4949	-3.30	2.5252	394	-7.60	0
FBgn0027564	FBtr0070846	0.3805	0	0	0	0.4714	-11.40	-2.0650	140	-5.80	0
FBgn0027565	FBtr0078238	0.4142	1	1	0	0.3372	-1.10	1.9435	86	-1.00	0
FBgn0027567	FBtr0076340	1.8015	0	0	0	0.3607	-0.60	1.7607	183	-3.50	0
FBgn0027568	FBtr0332198	1.8776	0	0	0	0.3300	-2.80	0.0162	200	-4.10	0
FBgn0027569	FBtr0076717	0.4683	1	1	1	0.4560	-5.90	-0.0317	193	-6.60	0
FBgn0027570	FBtr0078891	0.2341	1	1	0	0.4177	-4.20	2.5864	316	-4.30	0
FBgn0027571	FBtr0335387	2.4382	0	0	0	0.3445	-0.20	2.9642	119	-5.70	0
FBgn0027572	FBtr0089548	0.5504	3	3	0	0.4540	-2.70	3.3394	326	-4.00	0
FBgn0027574	FBtr0085106	0.8822	1	1	1	0.3387	-3.90	3.8539	62	-4.00	0
FBgn0027579	FBtr0085251	0.9401	2	2	2	0.4279	-8.60	-0.0640	215	-1.90	0
FBgn0027580	FBtr0300850	0.3581	0	0	0	0.5029	-5.50	1.3414	346	-7.80	0
FBgn0027581	FBtr0330617	0.7019	4	4	4	0.4080	-5.40	-1.7050	880	-5.50	0
FBgn0027582	FBtr0080228	1.3156	1	1	1	0.4054	-6.60	-1.5995	148	-4.00	0
FBgn0027583	FBtr0085544	1.8558	1	1	0	0.4255	-6.60	2.1678	94	-7.40	0
FBgn0027585	FBtr0088713	0.0410	0	0	0	0.6002	-8.80	1.1428	888	-3.90	0
FBgn0027587	FBtr0072528	1.0649	1	1	1	0.3960	-4.80	1.6403	149	-2.20	0
FBgn0027588	FBtr0070058	1.4561	0	0	0	0.4298	-5.90	0.2839	114	-11.60	0
[truncated: 5,897 more rows]

## Sheet: 2-6h embryos
Gene	Major_isoform	TE_CDS	Num_uORF(TE_uORF>0)	Num_uORF(TE_uORF>=0.1)	Num_uORF(TE_uORF>=0.5)	UTR5_GC_content	MFE_cAUG	cAUG_Kozak_score	UTR5_length	MFE_CAP	Num_stable_hairpin
FBgn0000008	FBtr0100521	0.9973	1	1	1	0.3913	-2.30	-2.5050	368	-6.60	0
FBgn0000014	FBtr0300485	1.0450	6	6	6	0.5066	-8.00	2.5773	1506	-8.80	1
FBgn0000015	FBtr0083384	0.6387	3	3	2	0.4649	-5.30	-1.0010	1211	-7.20	1
FBgn0000017	FBtr0330135	1.1066	5	5	5	0.4547	-4.00	-0.9316	739	-8.00	0
FBgn0000018	FBtr0080168	0.8215	0	0	0	0.4691	-9.80	2.2201	81	-6.10	0
FBgn0000022	FBtr0070072	6.0662	0	0	0	0.4286	-3.30	2.4983	63	-4.10	0
FBgn0000032	FBtr0085609	1.9255	1	1	1	0.4225	-12.00	2.9887	187	-3.70	0
FBgn0000038	FBtr0073299	0.9211	1	1	1	0.3917	-3.20	1.6900	240	-1.40	0
FBgn0000042	FBtr0070822	1.0122	0	0	0	0.3727	-0.10	3.6509	161	-5.10	0
FBgn0000043	FBtr0086029	1.4944	0	0	0	0.3630	0.00	3.6509	135	-3.70	0
FBgn0000044	FBtr0071519	0.7281	0	0	0	0.3750	-2.70	4.0480	96	-3.30	0
FBgn0000046	FBtr0082785	0.4939	0	0	0	0.4321	-3.40	2.5267	81	-5.60	0
FBgn0000052	FBtr0079220	0.3986	0	0	0	0.5971	-6.80	1.7730	139	-12.80	0
FBgn0000053	FBtr0100353	0.8322	0	0	0	0.4611	-9.20	-0.7943	193	-7.10	0
FBgn0000054	FBtr0086113	2.5175	0	0	0	0.4382	0.00	-1.1867	178	-6.20	0
FBgn0000055	FBtr0100590	2.0153	0	0	0	0.4444	-2.50	2.0900	72	-2.60	0
FBgn0000057	FBtr0340288	0.2851	3	3	2	0.4643	-2.90	0.4081	140	-9.00	0
FBgn0000061	FBtr0078053	0.4863	0	0	0	0.4927	-5.40	-1.2967	410	-10.30	0
FBgn0000063	FBtr0083478	0.9487	0	0	0	0.3300	-3.10	2.4087	100	-0.60	0
FBgn0000064	FBtr0084995	1.1701	0	0	0	0.4000	-6.20	3.5279	55	-6.70	0
FBgn0000071	FBtr0081619	0.9323	0	0	0	0.4333	-3.00	1.4215	120	-5.30	0
FBgn0000075	FBtr0081154	0.5060	0	0	0	0.4125	-3.40	-1.0740	160	-7.10	0
FBgn0000077	FBtr0307281	2.1228	0	0	0	0.3906	-3.00	4.3002	64	-2.90	0
FBgn0000083	FBtr0089518	2.2409	0	0	0	0.3623	0.00	4.3264	69	-2.70	0
FBgn0000084	FBtr0070025	0.7523	0	0	0	0.4701	-4.70	2.0633	134	-8.40	0
FBgn0000097	FBtr0077850	0.9327	4	4	4	0.4645	-6.10	-3.0429	999	-12.40	1
FBgn0000100	FBtr0078481	0.1121	0	0	0	0.4118	-0.10	3.2504	85	-4.00	0
FBgn0000108	FBtr0307294	1.6410	0	0	0	0.5049	-3.00	1.6895	206	-10.00	0
FBgn0000109	FBtr0346440	1.9675	1	1	1	0.3738	0.00	3.5941	107	-7.30	0
FBgn0000114	FBtr0300567	0.1979	0	0	0	0.3994	-3.30	1.3750	333	-8.40	0
FBgn0000115	FBtr0075517	2.0199	0	0	0	0.3803	-4.10	1.3583	142	-0.50	0
FBgn0000116	FBtr0345030	1.2697	0	0	0	0.5000	NA	2.5981	10	NA	NA
FBgn0000117	FBtr0089988	0.8196	1	1	1	0.4387	-6.70	3.1367	155	-5.60	0
FBgn0000119	FBtr0087702	0.8156	2	2	2	0.4607	-2.70	2.0370	191	-6.60	0
FBgn0000137	FBtr0070075	0.9096	0	0	0	0.4641	0.00	0.1051	209	-5.00	0
FBgn0000139	FBtr0084660	1.3229	1	1	1	0.4712	-2.30	0.9217	104	-7.70	0
FBgn0000140	FBtr0084692	0.5916	1	1	0	0.4062	-0.10	-0.1598	192	-6.80	0
FBgn0000146	FBtr0080165	1.9035	0	0	0	0.4054	-3.60	-0.2087	111	-5.80	0
FBgn0000147	FBtr0082483	2.2036	1	1	1	0.4583	-1.00	-0.2291	168	-0.80	0
FBgn0000150	FBtr0346611	1.3063	0	0	0	0.4333	NA	1.9042	30	NA	NA
FBgn0000152	FBtr0074372	0.6755	5	5	5	0.4044	-7.20	1.1882	455	-2.10	0
FBgn0000157	FBtr0072379	1.2053	2	2	1	0.4894	-21.70	-1.3224	615	-7.60	0
FBgn0000158	FBtr0084869	2.1401	0	0	0	0.3210	-4.20	1.1258	81	-2.00	0
FBgn0000163	FBtr0074388	1.1216	17	17	13	0.4034	-4.80	2.5009	1066	-8.80	0
FBgn0000166	FBtr0081665	0.4662	1	1	1	0.4769	-6.60	2.4972	195	-4.50	0
FBgn0000173	FBtr0300566	4.0834	0	0	0	0.4449	-4.20	1.1882	245	-1.60	0
FBgn0000179	FBtr0300609	0.4114	1	1	1	0.3941	-5.70	-1.9064	642	-9.80	0
FBgn0000180	FBtr0079929	1.1864	1	1	1	0.4656	-3.20	2.1517	305	-9.80	0
FBgn0000181	FBtr0087783	0.8601	1	1	1	0.4351	-4.70	-1.0570	154	-2.10	0
FBgn0000182	FBtr0080805	0.3363	0	0	0	0.2594	-0.70	-0.0812	239	-5.80	0
FBgn0000183	FBtr0081002	1.3854	3	3	3	0.4646	-1.60	1.5572	891	-3.00	0
FBgn0000212	FBtr0075523	0.6915	0	0	0	0.4252	-2.20	1.9617	127	-4.50	0
FBgn0000216	FBtr0075621	2.9298	0	0	0	0.4167	-0.30	3.8729	72	-2.50	0
FBgn0000221	FBtr0070638	0.7326	0	0	0	0.3472	-4.30	0.3101	144	-2.10	0
FBgn0000227	FBtr0077423	4.2535	0	0	0	0.3977	-4.10	3.0453	88	-4.90	0
FBgn0000228	FBtr0302567	1.5854	0	0	0	0.1875	NA	4.6558	16	NA	NA
FBgn0000229	FBtr0080087	1.3638	5	5	5	0.3111	-1.50	2.2730	270	-5.20	0
FBgn0000233	FBtr0071379	1.3096	2	2	2	0.4221	-3.50	3.2270	488	-7.60	0
FBgn0000239	FBtr0301342	1.8386	0	0	0	0.5027	-8.30	2.5228	372	-6.00	0
FBgn0000241	FBtr0072117	0.5449	0	0	0	0.5287	-10.00	1.5658	261	-3.60	0
FBgn0000244	FBtr0082119	0.9902	0	0	0	0.3704	NA	1.9659	27	NA	NA
FBgn0000246	FBtr0083196	3.0496	1	1	1	0.4177	-5.90	3.5878	79	-8.10	0
FBgn0000247	FBtr0346613	0.3106	0	0	0	0.4639	-5.60	0.7776	97	-5.30	0
FBgn0000250	FBtr0080845	1.9816	1	1	1	0.4151	-1.80	2.2503	159	-6.70	0
FBgn0000251	FBtr0081413	2.4312	1	1	1	0.4065	-3.20	3.9037	214	-4.50	0
FBgn0000253	FBtr0088001	4.5988	0	0	0	0.4058	0.00	4.2544	207	-3.60	0
FBgn0000256	FBtr0077513	0.2980	2	2	1	0.4951	-13.80	-2.1048	511	-5.10	0
FBgn0000257	FBtr0074728	0.4594	0	0	0	0.5849	-4.30	-0.4357	159	-6.60	0
FBgn0000259	FBtr0307896	2.0460	0	0	0	0.4167	NA	3.9449	36	NA	NA
FBgn0000261	FBtr0075058	1.7665	0	0	0	0.4121	-2.10	4.2987	182	-5.60	0
FBgn0000273	FBtr0335495	1.2338	8	8	8	0.4759	-6.30	3.0691	1263	-4.00	1
FBgn0000283	FBtr0083126	1.1294	3	3	3	0.4906	-6.20	2.3587	212	-6.90	0
FBgn0000286	FBtr0089647	0.7725	1	1	0	0.4140	-7.00	1.1854	343	-7.30	0
FBgn0000289	FBtr0339962	1.5026	3	3	3	0.4443	-1.00	1.4373	754	-2.30	0
FBgn0000299	FBtr0079001	0.5394	0	0	0	0.5000	-6.30	0.8185	102	-10.30	0
FBgn0000307	FBtr0080839	0.7761	7	6	6	0.4216	-4.20	-2.4828	721	-7.10	0
FBgn0000308	FBtr0079233	3.2925	0	0	0	0.4760	0.00	2.3430	250	-6.70	0
FBgn0000316	FBtr0070065	1.8448	0	0	0	0.3250	-6.50	1.3890	120	-2.50	0
FBgn0000317	FBtr0343686	0.8835	3	3	3	0.4755	-4.90	2.5073	286	-6.80	0
FBgn0000318	FBtr0079095	2.1416	0	0	0	0.4894	-4.90	0.6453	141	-6.90	0
FBgn0000319	FBtr0074180	0.7735	1	1	1	0.3697	-8.10	2.4061	330	0.00	0
FBgn0000320	FBtr0079335	0.4456	0	0	0	0.4455	-8.70	1.7997	211	-15.60	0
FBgn0000326	FBtr0071687	1.4017	0	0	0	0.4112	-9.70	2.3754	107	-6.50	0
FBgn0000330	FBtr0071033	1.1147	0	0	0	0.3148	-2.70	-0.9364	54	-3.10	0
FBgn0000337	FBtr0344723	0.2400	0	0	0	0.5526	NA	-1.0390	38	NA	NA
FBgn0000339	FBtr0080849	6.5986	0	0	0	0.4265	-5.60	3.0454	136	-2.70	0
FBgn0000346	FBtr0333329	1.4567	0	0	0	0.2933	0.00	2.8522	225	-3.90	0
FBgn0000351	FBtr0079320	0.0383	0	0	0	0.3529	-7.10	-2.2587	85	-3.50	0
FBgn0000352	FBtr0336916	0.6797	2	2	2	0.4632	-6.30	3.0033	136	-6.50	0
FBgn0000355	FBtr0076572	0.0000	0	0	0	0.3913	-1.80	1.9480	46	-4.00	0
FBgn0000357	FBtr0076571	0.0000	0	0	0	0.4318	-2.20	1.5202	44	-2.90	0
FBgn0000359	FBtr0071203	0.0458	0	0	0	0.5526	NA	2.2555	38	NA	NA
FBgn0000360	FBtr0300448	0.0533	0	0	0	0.5584	-6.60	2.7315	77	-4.00	0
FBgn0000370	FBtr0081512	0.1372	4	4	4	0.3841	-1.10	-0.8348	289	-2.90	0
FBgn0000376	FBtr0070495	0.6103	1	1	0	0.4511	-8.70	3.5458	133	-6.20	0
FBgn0000377	FBtr0070418	0.7605	0	0	0	0.4167	-5.30	1.0974	120	-1.80	0
FBgn0000382	FBtr0070378	1.1094	0	0	0	0.2982	-1.50	2.6280	171	-4.80	0
FBgn0000384	FBtr0111126	1.7460	8	8	8	0.3770	-8.30	-0.5216	382	-1.40	0
FBgn0000392	FBtr0290322	1.8062	4	4	4	0.3626	-6.80	-2.7534	182	-2.90	0
FBgn0000394	FBtr0340464	0.7607	1	1	1	0.4384	-3.00	-0.0831	333	-4.60	0
FBgn0000395	FBtr0071610	0.5794	13	12	12	0.4445	-2.20	2.2964	1082	-11.30	0
FBgn0000404	FBtr0076075	1.7207	6	6	3	0.4392	-2.10	1.9203	510	-4.90	0
FBgn0000405	FBtr0071911	1.9749	0	0	0	0.4045	-1.70	4.6558	267	-4.10	0
FBgn0000406	FBtr0331931	0.5202	0	0	0	0.4944	-6.20	1.9772	89	-9.90	0
FBgn0000409	FBtr0080889	2.9060	0	0	0	0.4070	-1.90	2.3942	86	-5.10	0
FBgn0000411	FBtr0333034	2.1036	0	0	0	0.3668	-1.50	-0.5900	199	-1.00	0
FBgn0000412	FBtr0081988	1.2569	0	0	0	0.4261	-0.60	2.5449	230	-3.90	0
FBgn0000414	FBtr0305086	0.5513	8	8	8	0.4529	-7.60	2.4691	552	-4.90	0
FBgn0000416	FBtr0085713	1.6010	0	0	0	0.3643	-2.50	2.4972	129	-2.70	0
FBgn0000422	FBtr0081166	0.3594	0	0	0	0.4286	-3.40	2.5749	203	-8.00	0
FBgn0000426	FBtr0088010	1.5941	0	0	0	0.3884	0.00	1.9938	121	-11.80	0
FBgn0000439	FBtr0081621	1.1659	4	4	3	0.3722	-3.00	-0.0161	489	-6.40	0
FBgn0000447	FBtr0081890	0.9681	0	0	0	0.6667	NA	0.3550	15	NA	NA
FBgn0000448	FBtr0306346	0.8054	3	3	3	0.5120	-3.50	-1.2784	502	-4.80	1
FBgn0000449	FBtr0073205	2.2963	0	0	0	0.4375	-2.50	2.6135	48	-2.80	0
FBgn0000451	FBtr0301385	2.1354	0	0	0	0.4947	0.00	3.1927	190	-11.10	0
FBgn0000454	FBtr0345229	1.0525	0	0	0	0.5556	-4.90	1.3630	63	-8.40	0
FBgn0000455	FBtr0082597	1.2942	0	0	0	0.4244	-2.70	2.9796	172	-3.30	0
FBgn0000459	FBtr0100384	1.0341	3	3	3	0.4324	-3.80	2.1435	562	-7.80	0
FBgn0000463	FBtr0083739	1.2306	6	6	6	0.4124	0.00	2.6189	679	-5.30	0
FBgn0000464	FBtr0331241	1.5552	4	4	3	0.4007	-4.20	2.0108	599	-6.70	0
FBgn0000477	FBtr0083538	0.9055	0	0	0	0.4474	NA	0.6129	38	NA	NA
FBgn0000479	FBtr0070517	0.3767	0	0	0	0.5938	-11.40	-2.7313	581	-7.80	1
FBgn0000482	FBtr0070269	0.5533	0	0	0	0.4648	-1.20	2.2446	71	-10.00	0
FBgn0000489	FBtr0075529	1.2678	1	1	1	0.4156	-5.00	0.2304	972	-5.40	0
FBgn0000490	FBtr0077775	0.6677	1	1	0	0.5860	-11.90	0.2425	186	-5.50	0
FBgn0000492	FBtr0085441	1.0310	2	2	2	0.4440	-4.40	-4.0648	250	-7.20	0
FBgn0000497	FBtr0078045	0.5825	1	1	1	0.4395	-7.40	1.9278	810	-5.60	0
FBgn0000499	FBtr0073454	1.4561	2	2	1	0.4799	-7.40	2.8427	473	-6.30	0
FBgn0000520	FBtr0070487	0.5391	0	0	0	0.4328	-8.00	1.3543	134	-1.70	0
FBgn0000524	FBtr0070914	0.4445	7	7	7	0.4638	-3.10	1.1761	414	-1.60	0
FBgn0000533	FBtr0083083	2.1939	0	0	0	0.4902	-8.60	2.2503	204	-7.60	0
FBgn0000536	FBtr0074212	1.7477	0	0	0	0.4427	-1.50	1.1173	192	-8.50	0
FBgn0000541	FBtr0332104	1.4696	3	3	3	0.4478	-2.70	3.1130	134	-4.60	0
FBgn0000542	FBtr0112802	0.9660	1	1	1	0.4150	-10.60	2.8058	347	-3.00	0
FBgn0000543	FBtr0072903	0.8147	1	1	0	0.4756	-0.10	-0.0684	82	-4.80	0
FBgn0000546	FBtr0086009	0.9644	8	8	5	0.4060	-8.10	-0.7347	468	-8.60	0
FBgn0000547	FBtr0334265	1.7592	1	1	1	0.3866	-0.80	3.5245	432	-8.10	0
FBgn0000551	FBtr0344634	1.0675	0	0	0	0.4211	-0.50	1.5572	76	-1.60	0
FBgn0000556	FBtr0345022	0.2831	0	0	0	0.3939	NA	3.5302	33	NA	NA
FBgn0000557	FBtr0085832	1.3641	0	0	0	0.4444	-3.00	0.6552	180	-4.40	0
FBgn0000559	FBtr0085911	0.3120	0	0	0	0.4667	-5.20	4.2326	75	-8.10	0
FBgn0000562	FBtr0343272	0.7616	0	0	0	0.5176	-2.00	1.1998	199	-9.70	0
FBgn0000565	FBtr0075554	1.9339	1	1	1	0.2687	-2.20	0.7505	67	-4.30	0
FBgn0000566	FBtr0345422	1.9339	0	0	0	0.5195	-0.90	2.7315	77	-4.50	0
FBgn0000568	FBtr0075151	0.4466	2	2	2	0.3901	-1.80	4.2544	746	-7.70	0
FBgn0000575	FBtr0072578	1.7445	0	0	0	0.4356	-2.90	1.8490	264	-6.20	0
FBgn0000576	FBtr0082863	0.9313	2	2	2	0.4141	-0.50	-3.8544	326	-3.00	0
FBgn0000577	FBtr0088096	0.6556	1	1	0	0.4413	-5.50	-0.1065	213	-6.60	0
FBgn0000578	FBtr0340450	1.6290	2	2	2	0.4864	-5.00	0.6185	405	-7.80	0
FBgn0000579	FBtr0077909	1.3023	0	0	0	0.4353	-6.40	1.7345	85	-5.10	0
FBgn0000581	FBtr0088140	0.3127	9	9	9	0.5058	0.00	2.5773	1036	-6.60	1
FBgn0000588	FBtr0080325	0.6986	0	0	0	0.4176	-7.70	2.5508	170	-8.50	0
FBgn0000591	FBtr0084961	0.9453	0	0	0	0.3571	0.00	4.2544	84	-5.20	0
FBgn0000606	FBtr0088390	2.1048	0	0	0	0.4583	-0.20	1.8407	96	-6.50	0
FBgn0000611	FBtr0074135	3.7682	1	1	1	0.3203	-6.00	2.2909	231	-3.40	0
FBgn0000615	FBtr0086243	0.5782	0	0	0	0.3404	-3.30	3.1860	141	-6.20	0
FBgn0000617	FBtr0074463	1.5755	0	0	0	0.3571	-0.70	-0.4001	98	-3.00	0
FBgn0000618	FBtr0073540	3.7152	1	1	1	0.3944	-3.90	0.7073	142	0.00	0
FBgn0000625	FBtr0339921	0.2240	0	0	0	0.3995	-7.20	1.2447	403	-7.50	0
FBgn0000629	FBtr0273338	1.0151	0	0	0	0.3898	-0.50	-0.1906	118	-9.10	0
FBgn0000633	FBtr0339940	0.3800	6	6	6	0.4682	-5.20	-0.3995	754	-10.90	0
FBgn0000635	FBtr0070665	1.0900	2	2	1	0.4048	-1.00	4.2806	420	-10.40	0
FBgn0000636	FBtr0112804	1.1411	2	2	2	0.4505	-0.90	1.1321	586	-2.40	0
FBgn0000639	FBtr0339515	0.0418	0	0	0	0.3830	-4.40	3.1629	94	-2.90	0
FBgn0000658	FBtr0086754	0.3442	5	4	4	0.4885	-7.70	3.3592	1349	-7.00	0
FBgn0000659	FBtr0345227	0.9863	3	3	3	0.4515	-7.70	0.7244	711	-3.00	0
FBgn0000662	FBtr0087647	1.3226	2	2	2	0.4541	-0.30	1.3109	425	-5.10	0
FBgn0000667	FBtr0070344	0.6681	3	3	3	0.4925	-2.20	2.3609	398	-2.90	0
FBgn0000709	FBtr0077192	0.4163	1	1	0	0.3725	-3.30	3.9449	153	-13.50	0
FBgn0000711	FBtr0071447	2.4134	0	0	0	0.4004	-5.90	3.5264	552	-3.10	0
FBgn0000719	FBtr0100538	2.2160	9	9	8	0.3632	-7.20	1.0830	859	-5.40	0
FBgn0000721	FBtr0301399	0.8132	3	3	1	0.4748	-4.80	0.7124	377	-7.90	0
FBgn0000723	FBtr0082051	0.5156	2	2	2	0.4795	-7.30	1.7580	342	-10.30	0
FBgn0000810	FBtr0070396	3.0261	0	0	0	0.4561	-6.00	0.1697	171	-4.80	0
FBgn0000826	FBtr0070234	0.2963	0	0	0	0.5441	-12.60	1.3617	68	-5.40	0
FBgn0000927	FBtr0070485	0.3617	0	0	0	0.4138	-7.90	-3.5935	58	-4.30	0
FBgn0000996	FBtr0339999	1.4222	0	0	0	0.3907	0.00	-0.3656	215	-4.80	0
FBgn0001075	FBtr0077478	0.5895	14	14	14	0.4309	-2.20	-0.6731	680	-15.50	0
FBgn0001077	FBtr0081625	3.9901	0	0	0	0.4571	-5.60	0.9140	70	-7.70	0
FBgn0001078	FBtr0075086	1.6762	15	15	11	0.4231	0.00	2.4485	1326	-3.00	0
FBgn0001079	FBtr0074602	0.7565	0	0	0	0.5059	-3.60	2.3249	85	-5.50	0
FBgn0001083	FBtr0112806	0.5961	9	9	7	0.5993	-10.40	-0.6950	1088	-13.10	1
FBgn0001084	FBtr0331992	0.8142	0	0	0	0.4655	-8.90	-1.1812	58	-3.40	0
FBgn0001085	FBtr0075743	1.4944	10	10	7	0.3652	-1.80	3.6746	712	-8.20	0
FBgn0001086	FBtr0080833	1.4726	1	1	1	0.3310	-2.90	3.1240	145	-3.70	0
FBgn0001087	FBtr0073842	0.9328	1	1	0	0.4160	-3.60	3.1706	238	-1.40	0
FBgn0001089	FBtr0079230	0.4071	0	0	0	0.5217	-6.50	1.9893	138	-8.30	0
FBgn0001090	FBtr0074657	1.1848	0	0	0	0.4046	-1.40	1.8471	173	-6.20	0
FBgn0001091	FBtr0100479	0.9720	0	0	0	0.4455	-2.40	0.2946	110	-5.60	0
FBgn0001092	FBtr0332618	1.0764	0	0	0	0.3922	-1.30	1.6993	51	-3.70	0
FBgn0001098	FBtr0089497	1.1611	0	0	0	0.5000	-4.30	0.9843	90	-11.50	0
FBgn0001099	FBtr0346516	7.5725	0	0	0	0.3986	-0.10	1.7054	138	-11.90	0
FBgn0001104	FBtr0076934	1.4265	2	1	1	0.4581	-3.30	1.6491	406	-1.80	0
FBgn0001105	FBtr0074107	1.5821	6	6	6	0.3998	-3.60	2.3609	848	-7.70	0
FBgn0001108	FBtr0075756	0.5233	1	1	1	0.4637	-4.40	1.1987	289	-6.20	0
FBgn0001114	FBtr0307091	1.2640	0	0	0	0.4800	-4.80	3.2670	50	-5.30	0
FBgn0001120	FBtr0075697	2.3572	0	0	0	0.2970	0.00	-1.2586	101	-6.40	0
FBgn0001122	FBtr0088264	5.1461	0	0	0	0.4176	0.00	3.7057	261	-4.90	0
FBgn0001123	FBtr0072142	2.4092	0	0	0	0.5318	-7.70	-0.6233	299	-6.50	0
FBgn0001124	FBtr0087232	2.2809	0	0	0	0.4330	-5.90	1.5871	97	-5.70	0
FBgn0001125	FBtr0077867	1.0257	0	0	0	0.3868	-4.50	1.0230	106	-6.30	0
FBgn0001128	FBtr0079146	1.5112	0	0	0	0.4483	-4.60	1.5387	145	-5.40	0
FBgn0001133	FBtr0071548	0.5873	3	3	2	0.3026	-0.50	2.5231	76	-6.80	0
FBgn0001137	FBtr0079708	0.2659	4	4	2	0.4545	-7.20	-1.8133	374	-2.80	0
FBgn0001138	FBtr0300040	0.7393	2	2	2	0.3905	-1.50	2.5252	420	-5.60	0
FBgn0001139	FBtr0084962	0.7117	4	4	3	0.4874	-5.00	3.3457	515	-4.80	0
FBgn0001142	FBtr0300568	2.2102	0	0	0	0.4677	-3.90	3.4661	186	-6.40	0
FBgn0001145	FBtr0073495	0.7764	0	0	0	0.4865	-2.50	0.1037	148	-3.80	0
FBgn0001147	FBtr0072461	0.3812	0	0	0	0.4737	-6.60	0.5004	323	-10.30	0
FBgn0001148	FBtr0072444	1.0812	0	0	0	0.4185	-2.70	1.8074	184	-6.60	0
FBgn0001149	FBtr0082607	1.3335	0	0	0	0.3429	-1.50	3.2504	70	-5.40	0
FBgn0001150	FBtr0070460	2.6316	0	0	0	0.4435	-1.90	2.0203	115	-8.10	0
FBgn0001168	FBtr0100153	2.2101	0	0	0	0.4440	0.00	3.2511	491	-4.00	0
FBgn0001169	FBtr0083916	0.8482	7	7	7	0.4659	0.00	-0.4451	558	-10.70	0
FBgn0001174	FBtr0114554	6.4111	0	0	0	0.4713	-1.40	0.9742	87	-5.80	0
FBgn0001179	FBtr0114599	1.1432	0	0	0	0.2727	-1.30	-0.3952	66	-3.30	0
FBgn0001180	FBtr0081950	1.9845	1	1	1	0.4854	-6.30	2.1253	515	-5.40	0
FBgn0001185	FBtr0080883	0.8184	2	2	2	0.3485	-5.20	-0.4085	198	-1.40	0
FBgn0001186	FBtr0071361	1.1897	1	1	1	0.4073	-0.50	2.4422	329	-7.80	0
FBgn0001189	FBtr0070270	1.0294	5	5	2	0.5286	-8.40	0.8770	350	-14.30	0
FBgn0001197	FBtr0085062	2.7738	0	0	0	0.4878	-1.80	2.8759	164	-1.90	0
FBgn0001202	FBtr0081180	1.6676	0	0	0	0.3729	-2.10	2.6414	118	-5.70	0
FBgn0001206	FBtr0071511	1.2502	1	1	1	0.4677	-10.50	0.7080	263	-10.30	0
FBgn0001208	FBtr0334645	1.2510	0	0	0	0.4211	-1.90	2.2964	76	-7.10	0
FBgn0001215	FBtr0085299	1.4223	0	0	0	0.3644	-1.90	2.8802	118	-8.50	0
FBgn0001218	FBtr0073609	1.6755	0	0	0	0.3893	-7.90	1.9893	131	-8.10	0
FBgn0001220	FBtr0339969	0.7783	0	0	0	0.4493	-2.60	3.2888	138	-2.90	0
FBgn0001222	FBtr0086782	1.5392	0	0	0	0.3745	-8.10	-4.1281	243	-5.10	0
FBgn0001223	FBtr0100559	2.0663	0	0	0	0.3031	-3.10	1.3409	254	-1.00	0
FBgn0001224	FBtr0309504	2.4398	0	0	0	0.3362	-2.20	4.2544	116	-7.00	0
FBgn0001225	FBtr0076496	1.7866	0	0	0	0.3262	-1.00	3.3411	187	-5.00	0
FBgn0001226	FBtr0076454	0.6711	0	0	0	0.3089	-0.90	3.2994	123	-2.10	0
FBgn0001227	FBtr0076495	0.4649	0	0	0	0.4632	-2.50	2.2964	95	-4.70	0
FBgn0001228	FBtr0100653	2.4304	0	0	0	0.5455	-5.70	2.3003	44	-5.70	0
FBgn0001229	FBtr0076497	2.2153	0	0	0	0.4611	-0.10	1.9340	180	-6.80	0
FBgn0001230	FBtr0084589	0.8661	0	0	0	0.3398	-0.60	2.1253	206	-5.40	0
FBgn0001233	FBtr0073040	1.0013	0	0	0	0.3289	-2.70	2.0860	152	-3.50	0
FBgn0001235	FBtr0100455	1.1252	12	12	11	0.3759	-4.70	-1.6111	1277	-5.60	0
FBgn0001247	FBtr0273273	0.8453	1	1	1	0.4393	-2.10	2.3846	346	-10.30	0
FBgn0001248	FBtr0076667	1.5948	0	0	0	0.3684	-0.80	2.6701	114	-10.20	0
FBgn0001250	FBtr0301352	0.7575	5	5	4	0.4319	-0.10	3.8950	257	-5.60	0
FBgn0001253	FBtr0076606	1.4315	1	1	1	0.4492	-10.70	0.1962	354	-8.50	0
FBgn0001254	FBtr0073141	2.3812	0	0	0	0.4430	-4.50	0.6603	79	-8.10	0
FBgn0001255	FBtr0310412	0.3583	0	0	0	0.4923	-2.40	0.8335	65	-2.40	0
FBgn0001256	FBtr0075842	2.3544	0	0	0	0.5250	NA	3.6241	40	NA	0
FBgn0001257	FBtr0333569	0.2095	4	4	4	0.5000	-0.60	2.5493	732	-6.80	0
FBgn0001258	FBtr0077008	1.2485	0	0	0	0.4130	0.00	3.3067	138	-6.70	0
FBgn0001259	FBtr0078183	0.1266	0	0	0	0.5000	-2.30	0.0103	118	-9.80	0
FBgn0001269	FBtr0088069	0.3540	3	3	0	0.4776	-1.70	-2.7424	268	-6.70	0
FBgn0001276	FBtr0088154	5.7190	0	0	0	0.3718	-1.00	0.1589	78	-3.10	0
FBgn0001280	FBtr0085595	2.9743	0	0	0	0.3951	-6.70	3.2959	81	-5.80	0
FBgn0001281	FBtr0085598	0.0446	0	0	0	0.3222	-0.90	2.8711	90	-2.00	0
FBgn0001291	FBtr0088410	2.3881	1	1	1	0.4036	-4.10	2.8411	275	-1.20	0
FBgn0001296	FBtr0082666	0.1828	0	0	0	0.5885	-3.90	0.8680	192	-11.40	0
FBgn0001297	FBtr0099989	0.4237	0	0	0	0.5212	-3.90	2.6195	708	-14.20	0
FBgn0001301	FBtr0081042	1.0512	0	0	0	0.5395	-5.40	-4.1070	152	-12.10	0
FBgn0001308	FBtr0087184	0.9743	2	2	2	0.4774	-0.80	0.9732	486	-4.60	0
FBgn0001311	FBtr0078800	0.4221	0	0	0	0.5344	-12.30	-0.6183	131	-3.70	0
FBgn0001316	FBtr0110818	0.5469	23	23	21	0.4135	-4.90	3.3067	1098	-7.50	0
FBgn0001319	FBtr0112809	0.8102	0	0	0	0.5319	-18.20	-1.6513	517	-6.90	0
FBgn0001320	FBtr0078283	1.6505	0	0	0	0.3882	0.00	2.7378	304	-4.70	0
FBgn0001321	FBtr0082194	1.2057	2	2	2	0.3730	-1.60	2.0869	445	-5.90	0
FBgn0001323	FBtr0078212	0.9262	9	9	9	0.4066	-10.60	2.4619	964	-7.80	0
FBgn0001324	FBtr0074884	0.3513	0	0	0	0.4355	-2.50	0.7053	62	-2.30	0
FBgn0001325	FBtr0072449	1.9542	1	1	1	0.3607	-2.40	-4.3667	341	-7.90	0
FBgn0001330	FBtr0070419	0.8253	1	1	1	0.3008	-13.90	1.3583	133	-6.60	0
FBgn0001341	FBtr0070119	1.1840	0	0	0	0.3805	0.00	2.1649	113	-3.50	0
FBgn0001404	FBtr0070439	0.9073	7	6	5	0.4742	0.00	3.1367	1493	-5.80	0
FBgn0001491	FBtr0073460	2.6927	1	1	1	0.3008	-1.30	0.7305	123	-5.10	0
FBgn0001565	FBtr0343853	0.5039	0	0	0	0.4842	-4.30	1.9218	95	-5.80	0
FBgn0001612	FBtr0073841	1.2315	3	3	3	0.4351	-10.20	0.8540	285	-4.60	0
FBgn0001624	FBtr0308088	1.7068	0	0	0	0.3171	0.00	0.2537	82	0.00	0
FBgn0001941	FBtr0079179	1.5173	1	1	0	0.4898	0.00	3.0691	147	-3.60	0
FBgn0001942	FBtr0079176	0.6465	0	0	0	0.3429	-4.40	2.4339	70	-5.90	0
FBgn0001961	FBtr0080569	0.7471	0	0	0	0.5136	-2.40	1.7901	257	-5.60	0
FBgn0001965	FBtr0080541	0.4197	1	1	1	0.5477	-8.70	1.2418	398	-7.80	1
FBgn0001970	FBtr0080629	0.4402	1	1	1	0.4141	-1.70	-2.4299	128	-9.40	0
FBgn0001974	FBtr0080696	1.9181	0	0	0	0.4177	-6.40	-0.3889	79	-2.60	0
FBgn0001977	FBtr0080725	2.2881	0	0	0	0.3837	-3.50	3.3086	86	-1.20	0
FBgn0001978	FBtr0080706	0.7082	1	1	1	0.5098	-6.10	-0.6659	410	-7.90	0
FBgn0001981	FBtr0080734	1.5845	1	1	1	0.3816	-0.80	1.9340	228	-0.50	0
FBgn0001983	FBtr0080740	0.7011	1	0	0	0.4133	-2.50	2.2466	150	-8.10	0
FBgn0001986	FBtr0080760	0.8751	1	1	1	0.4149	-1.30	-0.3014	94	-5.40	0
FBgn0001987	FBtr0080768	0.7126	0	0	0	0.5526	-9.20	1.7857	76	-10.30	0
FBgn0001989	FBtr0080771	1.0869	0	0	0	0.4020	-0.90	4.2326	102	-4.50	0
FBgn0001990	FBtr0080764	1.0925	0	0	0	0.4492	-6.30	0.8787	118	-5.40	0
FBgn0001991	FBtr0332025	0.3687	0	0	0	0.5443	-8.92	2.7676	1477	-5.90	1
FBgn0001994	FBtr0343814	1.0377	5	5	5	0.4510	-1.40	2.6232	541	-6.90	0
FBgn0001995	FBtr0080843	1.6705	0	0	0	0.4400	-0.70	2.3354	50	-0.90	0
FBgn0002021	FBtr0081177	0.4952	1	1	1	0.2368	0.00	2.6426	114	-4.40	0
FBgn0002022	FBtr0081143	1.9746	0	0	0	0.4405	-8.90	4.2244	84	-0.40	0
FBgn0002023	FBtr0081170	0.3830	0	0	0	0.4082	-4.40	0.6118	294	-4.20	0
FBgn0002031	FBtr0081164	1.1926	0	0	0	0.3333	0.00	1.3476	117	-4.10	0
FBgn0002036	FBtr0081155	0.3821	1	1	1	0.3826	-4.30	-1.4659	379	-1.00	0
FBgn0002044	FBtr0081245	1.0286	1	1	1	0.4532	-2.20	-0.5876	331	-6.40	0
FBgn0002069	FBtr0087784	0.6315	1	0	0	0.4615	-7.10	3.0691	117	-8.00	0
FBgn0002121	FBtr0078169	1.3600	5	5	5	0.4142	-4.70	-2.9609	367	-3.00	0
FBgn0002174	FBtr0089504	0.5531	4	4	3	0.3699	-0.20	3.2125	73	-10.00	0
FBgn0002183	FBtr0072865	0.3519	1	1	1	0.4478	-4.50	1.4193	134	-1.20	0
FBgn0002283	FBtr0307336	1.0212	1	1	1	0.4881	-1.80	1.4916	295	-3.20	0
FBgn0002284	FBtr0075360	3.9494	0	0	0	0.3600	-2.60	2.4469	100	-6.60	0
FBgn0002306	FBtr0334884	1.2289	2	2	1	0.3840	-0.60	3.6703	125	-7.10	0
FBgn0002354	FBtr0082703	1.5729	0	0	0	0.3623	-8.50	1.1452	69	-3.80	0
FBgn0002413	FBtr0085743	1.3497	4	4	4	0.4419	0.00	4.6059	396	-8.70	0
FBgn0002431	FBtr0082090	1.3559	2	2	2	0.3778	-3.80	3.2504	90	-5.30	0
FBgn0002441	FBtr0085175	0.7480	8	8	8	0.3977	-1.10	2.9444	787	-2.60	0
FBgn0002466	FBtr0075970	0.6431	2	2	2	0.4189	-1.80	0.7325	148	-8.30	0
FBgn0002521	FBtr0089205	5.0897	5	5	5	0.3297	-2.20	1.9591	182	-2.60	0
FBgn0002522	FBtr0081696	0.8219	0	0	0	0.4918	-8.50	1.9550	244	-5.30	0
FBgn0002524	FBtr0343735	1.2985	0	0	0	0.3936	-7.50	1.7036	94	-1.20	0
FBgn0002525	FBtr0079100	0.9412	0	0	0	0.4206	-1.80	1.5940	126	-0.10	0
FBgn0002526	FBtr0077014	0.5701	1	1	1	0.4638	-10.90	2.9932	207	-12.80	0
FBgn0002531	FBtr0088763	0.2207	0	0	0	0.4762	-3.70	1.7502	42	-3.70	0
FBgn0002535	FBtr0088744	0.7748	0	0	0	0.4082	-2.90	3.7163	49	-2.90	0
FBgn0002542	FBtr0081758	0.7502	1	1	1	0.3469	-4.40	2.9706	98	-4.70	0
FBgn0002543	FBtr0077941	0.7955	6	6	6	0.4792	-3.80	3.2651	288	-8.40	0
FBgn0002552	FBtr0088651	0.5884	3	3	3	0.5135	-10.10	-1.0910	520	-11.50	0
FBgn0002561	FBtr0070074	2.6066	0	0	0	0.3733	-2.40	1.2947	75	-7.90	0
FBgn0002564	FBtr0072463	0.6399	0	0	0	0.5176	-1.00	-0.0447	85	-10.20	0
FBgn0002565	FBtr0345352	0.0113	0	0	0	0.5294	NA	1.3115	17	NA	NA
FBgn0002566	FBtr0111125	2.0457	0	0	0	0.2574	-2.90	-1.1473	101	-4.00	0
FBgn0002567	FBtr0089934	1.4891	3	3	3	0.4557	-9.60	-3.8903	610	-7.20	0
FBgn0002569	FBtr0088747	0.3548	0	0	0	0.5455	NA	2.3179	22	NA	NA
FBgn0002571	FBtr0088758	0.5117	0	0	0	0.5278	NA	-0.0208	36	NA	NA
FBgn0002573	FBtr0075862	0.4292	0	0	0	0.4128	-2.20	4.3264	218	-8.90	0
FBgn0002577	FBtr0073555	1.2328	0	0	0	0.4552	-2.70	2.9878	435	-6.20	0
FBgn0002578	FBtr0084957	2.1778	0	0	0	0.3263	0.00	3.9293	95	-0.30	0
FBgn0002579	FBtr0345321	0.4773	0	0	0	0.3810	NA	2.8689	21	NA	NA
FBgn0002590	FBtr0074406	0.3715	0	0	0	0.4355	-6.20	3.5521	62	-6.70	0
FBgn0002592	FBtr0084981	0.8432	0	0	0	0.5093	-3.10	3.0384	108	-7.80	0
FBgn0002593	FBtr0331932	0.1401	0	0	0	0.4390	-6.20	1.6199	123	-5.70	0
FBgn0002607	FBtr0072406	0.3691	0	0	0	0.5000	NA	1.1385	36	NA	NA
FBgn0002609	FBtr0084958	0.3417	2	2	2	0.4213	0.00	0.2719	197	-3.30	0
FBgn0002622	FBtr0084410	0.2997	0	0	0	0.4884	-2.80	3.9449	43	-2.80	0
FBgn0002626	FBtr0085592	0.5491	0	0	0	0.4571	NA	2.7658	35	NA	NA
FBgn0002629	FBtr0084980	1.7155	0	0	0	0.4302	-2.10	1.5572	86	-2.90	0
FBgn0002631	FBtr0084979	1.1666	0	0	0	0.3855	0.00	4.2089	83	-6.70	0
FBgn0002632	FBtr0084959	2.8060	0	0	0	0.3973	-2.60	1.7148	73	-0.90	0
FBgn0002633	FBtr0084960	0.9516	0	0	0	0.4000	0.00	2.9299	125	-3.90	0
FBgn0002638	FBtr0077075	0.9767	1	0	0	0.5246	-2.40	1.8834	183	-14.30	0
FBgn0002641	FBtr0077306	0.9052	3	3	3	0.4622	-1.70	2.8458	119	-5.00	0
FBgn0002643	FBtr0087597	0.8204	1	1	1	0.5510	-6.10	-3.5511	363	-13.00	0
FBgn0002645	FBtr0085875	3.7683	0	0	0	0.4135	-2.00	0.6160	445	-5.10	0
FBgn0002673	FBtr0331444	2.2532	0	0	0	0.4310	-2.40	1.4381	174	-5.20	0
FBgn0002707	FBtr0343574	0.8471	0	0	0	0.3750	-5.40	0.1051	72	-3.90	0
FBgn0002709	FBtr0303847	0.2000	1	1	0	0.4889	-5.50	0.2275	360	-1.00	0
FBgn0002715	FBtr0342979	1.7263	1	1	1	0.3721	-3.80	-0.2273	86	-1.00	0
FBgn0002716	FBtr0086461	0.8148	6	6	5	0.4176	-2.00	2.9995	886	-4.60	0
FBgn0002719	FBtr0330025	0.4785	0	0	0	0.5155	-1.60	2.7315	258	-9.00	0
FBgn0002723	FBtr0073521	0.3858	1	1	1	0.3750	-5.80	4.2326	744	-9.70	0
FBgn0002732	FBtr0084956	0.9942	0	0	0	0.4000	0.00	2.9444	70	-4.60	0
FBgn0002733	FBtr0084982	0.6443	0	0	0	0.4308	0.00	4.6059	130	-5.00	0
FBgn0002734	FBtr0084954	1.4680	0	0	0	0.4505	0.00	3.2849	111	-6.90	0
FBgn0002735	FBtr0084955	0.5680	0	0	0	0.4022	0.00	3.2959	92	-9.50	0
FBgn0002736	FBtr0071569	3.0685	0	0	0	0.3419	-5.20	0.7742	117	-4.60	0
FBgn0002772	FBtr0085196	1.4236	0	0	0	0.4462	-4.20	4.2244	65	-3.40	0
FBgn0002773	FBtr0089747	1.0580	0	0	0	0.5077	-4.70	2.6724	65	-7.00	0
FBgn0002774	FBtr0086031	0.6769	0	0	0	0.2619	-2.20	1.4743	84	-1.60	0
FBgn0002775	FBtr0076926	1.5814	0	0	0	0.3514	-1.50	-0.0677	111	-1.50	0
FBgn0002778	FBtr0075627	1.1925	7	7	7	0.4074	-1.10	3.4786	540	-8.70	0
FBgn0002780	FBtr0310268	2.8852	0	0	0	0.4174	-0.60	4.2743	115	0.00	0
FBgn0002781	FBtr0084079	0.7894	0	0	0	0.5149	-14.60	3.0691	773	-4.10	0
FBgn0002783	FBtr0083238	0.9131	0	0	0	0.3564	-2.60	2.5149	101	-0.20	0
FBgn0002787	FBtr0072290	0.9510	0	0	0	0.4649	0.00	2.5927	185	-2.80	0
FBgn0002789	FBtr0087745	1.4734	0	0	0	0.4658	-1.20	2.5971	73	-8.00	0
FBgn0002791	FBtr0072156	1.1167	1	1	1	0.3590	-3.50	-0.5453	78	-4.80	0
FBgn0002868	FBtr0082158	2.8110	0	0	0	0.3920	-2.10	2.5330	125	-4.40	0
FBgn0002872	FBtr0072856	1.0442	0	0	0	0.5385	NA	1.0304	26	NA	NA
FBgn0002873	FBtr0308329	1.5757	3	3	3	0.3866	-4.20	1.9562	388	-7.80	0
FBgn0002878	FBtr0073817	0.8307	0	0	0	0.5000	-6.50	1.3780	108	-5.10	0
FBgn0002887	FBtr0100473	0.1419	1	1	1	0.2843	-1.30	2.7889	102	-8.30	0
FBgn0002891	FBtr0088831	0.3459	0	0	0	0.3803	-8.40	2.8281	71	-2.30	0
FBgn0002899	FBtr0076689	0.3077	0	0	0	0.5172	NA	0.1334	29	NA	NA
FBgn0002901	FBtr0075122	1.2898	1	1	1	0.3861	-2.60	1.9157	101	-1.10	0
FBgn0002905	FBtr0082662	0.4325	0	0	0	0.4022	-3.20	1.6147	92	-2.00	0
FBgn0002906	FBtr0082434	0.5019	1	1	1	0.3571	-3.90	-0.6641	126	-3.80	0
FBgn0002909	FBtr0344453	0.4873	4	4	4	0.5279	-3.20	1.6403	394	-3.10	0
FBgn0002914	FBtr0074169	1.2816	7	7	7	0.4343	-0.90	1.3348	624	-9.20	0
FBgn0002921	FBtr0089510	1.0099	0	0	0	0.1923	NA	2.4982	26	NA	NA
FBgn0002924	FBtr0085534	0.8120	0	0	0	0.4628	-5.00	-0.6273	121	-6.50	0
FBgn0002931	FBtr0330637	4.4133	2	2	2	0.3525	-6.20	-1.4144	295	-1.70	0
FBgn0002932	FBtr0082004	1.2886	2	2	2	0.3652	-0.20	1.5979	282	-4.40	0
FBgn0002945	FBtr0075039	0.6341	5	5	5	0.4482	-6.40	0.4069	1082	-7.60	0
FBgn0002948	FBtr0073516	0.4890	2	2	2	0.3816	-0.20	-1.7463	152	-7.90	0
FBgn0002962	FBtr0335019	0.7536	1	1	1	0.4106	-7.10	0.6959	263	-2.80	0
FBgn0002973	FBtr0079822	1.0969	5	5	5	0.4540	-7.50	0.1194	793	-6.20	0
FBgn0002985	FBtr0077557	2.0380	0	0	0	0.4724	-2.20	0.4970	398	-2.20	0
FBgn0002989	FBtr0077673	0.6987	0	0	0	0.4600	-3.90	0.8627	50	-5.10	0
FBgn0003002	FBtr0078836	2.0175	2	2	2	0.4471	0.00	1.9433	293	-6.60	0
FBgn0003008	FBtr0072152	3.4879	0	0	0	0.3580	-2.30	-0.0026	81	-4.40	0
FBgn0003009	FBtr0343199	3.4412	0	0	0	0.2000	NA	2.9685	25	NA	NA
FBgn0003015	FBtr0081954	0.4308	0	0	0	0.5500	NA	0.0126	20	NA	NA
FBgn0003016	FBtr0301495	0.5912	3	3	3	0.4199	-7.40	2.3622	662	-13.40	0
FBgn0003023	FBtr0333146	0.1300	0	0	0	0.5270	-3.10	1.2694	74	-7.90	0
FBgn0003028	FBtr0070740	0.4460	5	5	3	0.5766	-31.60	-2.8609	1169	-7.50	1
FBgn0003041	FBtr0076772	1.5495	8	7	7	0.4355	-0.90	-1.3485	496	-16.10	0
FBgn0003042	FBtr0078405	2.2096	0	0	0	0.3182	-0.60	3.5541	110	-4.50	0
FBgn0003044	FBtr0086735	0.9711	10	10	10	0.4418	-2.30	1.6162	498	-6.90	0
FBgn0003048	FBtr0332381	0.4303	1	1	1	0.5590	-8.20	2.6218	415	-7.40	0
FBgn0003053	FBtr0100265	0.2780	1	1	1	0.3449	-2.50	2.5826	519	-6.90	0
FBgn0003057	FBtr0074400	0.1931	0	0	0	0.4444	-5.60	1.0323	54	-5.50	0
FBgn0003060	FBtr0082860	0.1219	0	0	0	0.4286	-7.60	1.8533	56	-4.00	0
FBgn0003062	FBtr0071982	0.7605	0	0	0	0.4427	-6.20	2.4485	131	-7.00	0
FBgn0003065	FBtr0085859	0.7261	1	1	0	0.5234	-0.20	-0.2977	107	-6.90	0
FBgn0003067	FBtr0086701	0.9014	3	3	3	0.3395	-0.30	3.6466	271	-6.90	0
FBgn0003071	FBtr0088421	1.0432	1	1	1	0.4651	-3.80	3.1970	559	-9.90	0
FBgn0003074	FBtr0088681	0.8382	0	0	0	0.5156	-7.20	1.7298	320	-4.40	0
FBgn0003076	FBtr0075492	0.7623	0	0	0	0.5366	NA	0.2545	41	NA	0
FBgn0003079	FBtr0070401	0.7230	4	4	4	0.4779	-0.80	2.4217	588	-4.10	0
FBgn0003082	FBtr0088839	0.4892	1	1	1	0.3814	-3.00	-1.3616	97	-6.80	0
FBgn0003087	FBtr0080001	7.6082	1	1	1	0.3455	0.00	4.6059	110	-2.50	0
FBgn0003089	FBtr0075007	1.9826	0	0	0	0.4581	-2.00	-4.9728	179	-5.20	0
FBgn0003090	FBtr0089044	0.2880	1	1	1	0.3961	0.00	3.2670	765	-8.10	0
FBgn0003093	FBtr0301516	0.2191	8	8	6	0.5275	-17.70	-2.8210	908	-9.10	0
FBgn0003114	FBtr0086306	3.6355	1	1	0	0.3478	NA	2.2046	23	NA	NA
FBgn0003116	FBtr0070389	1.5488	1	1	1	0.4270	-0.90	-0.1376	89	-3.20	0
FBgn0003117	FBtr0083221	0.8389	5	5	5	0.3806	-5.90	1.2929	494	-4.40	0
FBgn0003118	FBtr0089717	0.7596	4	4	4	0.4432	-7.30	1.6067	783	-4.10	0
FBgn0003124	FBtr0100318	1.3613	1	1	1	0.5019	-5.70	3.1352	263	-4.40	0
FBgn0003129	FBtr0111026	0.5191	3	3	3	0.4850	-5.30	2.8696	668	-6.20	0
FBgn0003134	FBtr0084642	1.7449	2	2	2	0.5141	-6.20	2.5330	389	-3.50	0
FBgn0003137	FBtr0301838	0.3935	2	2	1	0.4569	-10.60	3.8539	383	-9.60	0
FBgn0003139	FBtr0331432	0.9510	0	0	0	0.5870	-11.60	1.3765	46	-11.80	0
FBgn0003141	FBtr0089395	4.5151	0	0	0	0.4201	-4.30	0.5619	369	-9.20	0
FBgn0003145	FBtr0080298	2.2390	1	1	1	0.4631	-8.00	0.6558	298	-7.50	0
FBgn0003149	FBtr0076594	0.5421	0	0	0	0.4089	0.00	2.6126	225	-3.50	0
FBgn0003159	FBtr0070402	1.0867	0	0	0	0.4527	-1.30	1.4436	296	-4.30	0
FBgn0003162	FBtr0071580	1.6209	0	0	0	0.5200	-7.30	1.2954	175	-2.90	0
FBgn0003165	FBtr0081990	0.7407	3	3	3	0.3571	-5.80	-0.9664	871	-8.90	0
FBgn0003169	FBtr0082977	1.7938	2	2	2	0.4891	-6.80	2.7987	458	-8.90	0
FBgn0003174	FBtr0332462	0.6972	3	3	2	0.4468	-3.60	2.2112	517	-6.40	0
FBgn0003175	FBtr0331941	0.3727	4	3	2	0.4760	-3.60	-0.1414	1231	-7.40	0
FBgn0003187	FBtr0080996	1.5882	1	1	1	0.4407	-11.10	3.2951	447	-5.60	0
FBgn0003189	FBtr0340155	0.5418	0	0	0	0.2927	-4.50	2.2926	82	-5.60	0
FBgn0003204	FBtr0343043	0.4979	0	0	0	0.4899	-4.70	2.1267	198	-5.30	0
FBgn0003205	FBtr0082122	2.6891	0	0	0	0.5125	-4.70	0.5560	441	-5.10	0
FBgn0003206	FBtr0073212	1.6161	0	0	0	0.4660	-5.10	0.1593	103	-13.30	0
FBgn0003209	FBtr0303868	0.3728	13	13	9	0.3963	-3.10	-3.5560	429	-1.40	0
FBgn0003210	FBtr0332290	0.9938	1	1	1	0.4206	-5.70	0.8594	321	-2.20	0
FBgn0003218	FBtr0340289	0.4637	0	0	0	0.5753	-4.40	2.6126	372	-8.10	0
FBgn0003227	FBtr0334595	0.5223	0	0	0	0.5333	NA	1.1348	15	NA	NA
FBgn0003231	FBtr0081253	1.3538	0	0	0	0.4097	-3.10	1.8688	349	-10.70	0
FBgn0003250	FBtr0075338	0.6647	0	0	0	0.5319	-11.70	1.3111	47	-6.60	0
FBgn0003254	FBtr0086512	0.4281	2	2	2	0.4724	-8.40	-0.1082	688	-5.20	0
FBgn0003256	FBtr0113700	6.7994	0	0	0	0.2588	0.00	-0.0357	85	-2.10	0
FBgn0003257	FBtr0084038	1.5497	0	0	0	0.4356	-1.40	1.4916	101	-3.20	0
FBgn0003261	FBtr0078650	1.0185	0	0	0	0.4983	-2.10	0.3250	297	-9.70	0
FBgn0003268	FBtr0085795	0.2689	0	0	0	0.3889	-4.30	1.3940	72	-6.60	0
FBgn0003270	FBtr0081081	5.7297	0	0	0	0.4667	NA	2.6388	15	NA	NA
FBgn0003274	FBtr0087105	0.1344	0	0	0	0.4149	-2.00	2.2218	94	-8.00	0
FBgn0003275	FBtr0078787	1.9420	0	0	0	0.4130	-2.50	-0.5075	92	-8.10	0
FBgn0003277	FBtr0073542	0.4976	1	1	1	0.5083	-10.00	1.0826	360	-3.50	0
FBgn0003278	FBtr0078054	0.9012	0	0	0	0.3838	-3.40	2.5472	99	-4.40	0
FBgn0003279	FBtr0085248	0.2370	0	0	0	0.3542	-4.70	2.8803	96	-8.00	0
FBgn0003285	FBtr0070562	0.8858	3	3	3	0.3963	-6.50	3.0384	540	-5.70	0
FBgn0003292	FBtr0076146	0.8275	6	6	6	0.4110	-0.50	-1.4667	438	-7.50	0
FBgn0003300	FBtr0077279	1.0650	0	0	0	0.4409	-6.60	0.7075	254	-5.40	0
FBgn0003301	FBtr0333655	0.1967	3	3	3	0.5448	-23.80	-2.6231	268	-8.50	0
FBgn0003302	FBtr0307288	0.7066	1	1	1	0.3662	-2.70	1.4780	71	-4.20	0
FBgn0003308	FBtr0082704	0.9931	2	2	2	0.4328	-7.10	1.6133	238	-10.50	0
FBgn0003310	FBtr0077994	0.7262	2	2	2	0.5066	-2.90	-0.9352	227	-3.40	0
FBgn0003312	FBtr0082475	0.2145	0	0	0	0.6509	-13.40	-1.5758	106	-7.90	0
FBgn0003313	FBtr0080237	3.1435	0	0	0	0.6071	NA	1.8312	28	NA	NA
FBgn0003317	FBtr0088832	0.9916	0	0	0	0.4074	-5.30	1.2260	54	-6.10	0
FBgn0003321	FBtr0073411	1.4515	1	1	1	0.3750	-0.90	0.7705	504	-1.70	0
FBgn0003326	FBtr0087856	0.7685	1	1	1	0.4689	-2.90	-3.1749	322	-5.70	0
FBgn0003328	FBtr0087369	1.0160	1	1	1	0.4395	-2.30	-1.7978	512	-6.10	0
FBgn0003330	FBtr0085245	1.5510	0	0	0	0.3509	-3.30	2.5249	114	-3.20	0
FBgn0003334	FBtr0306008	0.9310	6	6	6	0.4605	-2.50	1.6649	456	-2.40	0
FBgn0003339	FBtr0081658	1.6742	2	2	2	0.4416	-2.40	2.8533	471	-8.20	0
FBgn0003345	FBtr0308132	0.6868	2	2	1	0.5303	-8.40	1.1607	198	-6.90	0
FBgn0003346	FBtr0334174	1.4803	1	1	1	0.3768	-2.10	0.5585	138	0.00	0
FBgn0003353	FBtr0072169	0.3868	0	0	0	0.2830	-1.60	3.3256	53	-3.10	0
FBgn0003360	FBtr0073421	1.7503	0	0	0	0.3962	-4.90	4.2987	106	-9.20	0
FBgn0003371	FBtr0070469	1.9501	3	3	3	0.4272	-3.80	0.4520	646	-5.40	0
FBgn0003377	FBtr0076095	0.0000	0	0	0	0.4000	NA	1.9678	35	NA	NA
FBgn0003382	FBtr0088120	0.4382	0	0	0	0.4413	-5.30	0.7460	528	-7.40	0
FBgn0003391	FBtr0071546	1.7289	4	4	4	0.4378	-9.50	-1.7477	724	-3.70	0
FBgn0003392	FBtr0301596	1.1894	0	0	0	0.4828	-8.60	1.9456	116	-5.30	0
FBgn0003396	FBtr0088098	1.8744	1	1	1	0.3354	-0.80	1.2606	161	-0.50	0
FBgn0003401	FBtr0072237	0.3025	0	0	0	0.3913	-4.90	0.9898	92	-3.70	0
FBgn0003410	FBtr0075332	0.9580	12	12	10	0.4297	-4.30	-2.3969	896	-6.60	1
FBgn0003411	FBtr0073461	2.6643	0	0	0	0.4776	-0.70	3.0295	67	-3.90	0
FBgn0003415	FBtr0333284	0.6242	4	4	4	0.3648	-3.90	0.7301	603	-4.80	0
FBgn0003416	FBtr0074230	0.6643	2	2	2	0.4908	-7.90	0.6773	271	-3.80	0
FBgn0003423	FBtr0307527	0.6646	0	0	0	0.4421	-1.90	-0.7186	95	-3.40	0
FBgn0003429	FBtr0334296	0.2627	0	0	0	0.4528	-12.30	-2.3653	508	-5.70	0
FBgn0003430	FBtr0077499	2.5224	0	0	0	0.3853	-0.10	3.9235	109	-6.60	0
FBgn0003435	FBtr0301609	1.8879	2	2	1	0.4221	-4.50	2.7463	912	-6.30	0
FBgn0003444	FBtr0078129	1.8305	2	2	2	0.4098	-1.20	-4.4043	244	-6.20	0
FBgn0003447	FBtr0301677	1.8260	1	1	1	0.4379	-7.20	2.3430	354	-8.10	0
FBgn0003448	FBtr0080739	1.9771	0	0	0	0.4837	0.00	3.8573	153	-8.40	0
FBgn0003449	FBtr0070748	3.2536	0	0	0	0.4107	-4.70	1.0067	112	-3.80	0
FBgn0003450	FBtr0112833	0.7974	3	3	3	0.3696	0.00	0.8170	92	-8.50	0
FBgn0003459	FBtr0075728	2.6853	0	0	0	0.4746	-5.30	-0.2669	177	-3.40	0
FBgn0003460	FBtr0088970	0.7012	5	5	4	0.4818	0.00	1.8760	795	-6.80	0
FBgn0003462	FBtr0076229	3.7572	1	1	1	0.3663	-1.60	2.8802	101	-4.70	0
FBgn0003463	FBtr0074063	0.9312	2	2	2	0.3775	0.00	3.5782	816	-6.50	0
FBgn0003464	FBtr0089679	0.4169	0	0	0	0.5471	-9.20	1.2441	329	-13.40	0
FBgn0003475	FBtr0301884	0.6850	6	6	6	0.3960	-5.70	1.6861	601	-5.30	0
FBgn0003479	FBtr0085589	1.2129	0	0	0	0.3776	-1.80	-0.9170	98	-11.30	0
FBgn0003480	FBtr0082933	0.2487	2	2	1	0.5000	-4.80	0.8604	160	-3.30	0
FBgn0003482	FBtr0085116	3.4225	0	0	0	0.3295	-1.50	1.6000	88	-6.60	0
FBgn0003483	FBtr0083183	1.6297	0	0	0	0.3281	-5.10	2.1267	64	-9.10	0
FBgn0003486	FBtr0077130	3.4487	0	0	0	0.4510	-6.30	2.9135	51	-0.70	0
FBgn0003495	FBtr0085138	1.2225	4	4	3	0.4437	-2.80	-0.2733	861	-6.80	0
FBgn0003502	FBtr0079615	1.3313	2	2	0	0.4124	-5.10	0.4899	434	-5.80	0
FBgn0003507	FBtr0083215	1.3121	0	0	0	0.5581	-12.70	0.6718	86	-6.60	0
FBgn0003510	FBtr0085557	3.0822	0	0	0	0.4222	-7.20	1.8495	45	-5.30	0
FBgn0003511	FBtr0085556	1.2407	0	0	0	0.4255	-7.00	-0.9141	94	-3.00	0
FBgn0003512	FBtr0085558	0.7248	0	0	0	0.3841	-12.70	1.6147	138	-3.80	0
FBgn0003514	FBtr0070877	2.6313	1	1	1	0.4919	0.00	1.6886	246	-5.40	0
FBgn0003517	FBtr0070290	0.1355	1	1	0	0.5056	-4.30	1.6086	180	-7.40	0
FBgn0003520	FBtr0086783	0.4327	4	4	0	0.4270	-6.40	2.2266	274	-2.10	0
FBgn0003525	FBtr0085397	0.7127	3	3	3	0.3804	-0.40	3.6466	397	-2.90	0
FBgn0003545	FBtr0340277	1.1426	0	0	0	0.4200	0.00	3.5466	100	-5.70	0
FBgn0003557	FBtr0339529	0.7933	1	1	1	0.5126	-7.30	0.2082	357	-0.40	1
FBgn0003559	FBtr0113733	0.7930	2	2	1	0.4425	-2.20	1.0230	287	-3.20	0
FBgn0003567	FBtr0082946	1.3968	0	0	0	0.3951	-6.40	3.5979	81	-2.30	0
FBgn0003575	FBtr0340082	1.2136	0	0	0	0.3769	-5.60	0.4163	260	-1.60	0
FBgn0003598	FBtr0301657	1.5854	0	0	0	0.3947	-5.90	-0.4767	152	-9.40	0
FBgn0003607	FBtr0079635	2.5275	0	0	0	0.3642	-2.70	4.6059	162	-4.70	0
FBgn0003612	FBtr0088576	1.2978	2	2	2	0.4350	-6.30	-0.6089	246	-5.70	0
FBgn0003638	FBtr0070176	0.4778	3	3	3	0.4233	-6.30	-0.1773	215	-1.60	0
FBgn0003651	FBtr0082563	0.4340	1	1	1	0.4062	-10.90	-0.5600	485	-7.60	0
FBgn0003654	FBtr0089397	1.3615	3	3	3	0.4322	-5.00	1.7929	199	-0.20	0
FBgn0003655	FBtr0070922	0.7801	0	0	0	0.4554	-8.40	0.4353	112	-5.20	0
FBgn0003656	FBtr0071125	0.4553	2	2	2	0.4518	-6.10	1.9962	695	-2.90	0
FBgn0003660	FBtr0088362	1.3419	0	0	0	0.3767	-1.70	3.3348	146	-4.10	0
FBgn0003676	FBtr0084290	0.9027	0	0	0	0.3636	-6.40	2.3208	44	-6.40	0
FBgn0003683	FBtr0075112	4.2360	0	0	0	0.3812	-0.10	0.7587	160	-3.30	0
FBgn0003687	FBtr0071679	2.2611	1	1	1	0.3895	-1.20	1.3328	190	-3.50	0
FBgn0003701	FBtr0340283	1.0465	2	2	2	0.4159	-2.60	3.2912	113	-7.80	0
FBgn0003714	FBtr0070459	3.5015	0	0	0	0.4136	-0.20	0.1001	191	-6.60	0
FBgn0003716	FBtr0079089	1.0933	6	6	5	0.4522	-5.50	1.7765	993	-10.80	0
FBgn0003719	FBtr0084691	1.3948	0	0	0	0.4923	-6.50	1.2219	65	-6.50	0
FBgn0003720	FBtr0085709	2.5764	0	0	0	0.4526	-2.70	-1.6762	232	-1.30	0
FBgn0003721	FBtr0089960	2.7050	0	0	0	0.4292	-2.20	3.9250	438	-6.30	0
FBgn0003731	FBtr0071654	0.8207	7	7	6	0.4462	0.00	1.9896	948	-5.60	0
FBgn0003732	FBtr0081287	0.7609	1	1	1	0.4481	-1.50	1.7580	270	-7.20	0
FBgn0003733	FBtr0088938	2.6779	1	1	1	0.3766	-2.30	1.9194	239	-4.90	0
FBgn0003741	FBtr0100244	1.4729	0	0	0	0.4286	NA	-2.9768	7	NA	NA
FBgn0003742	FBtr0089620	1.0484	1	1	1	0.4235	-2.40	-1.1513	170	-3.30	0
FBgn0003744	FBtr0074922	0.6284	0	0	0	0.5142	-3.30	-2.2958	212	-5.20	0
FBgn0003748	FBtr0071535	2.3220	4	4	4	0.4361	-11.90	1.6067	532	-6.10	0
FBgn0003862	FBtr0082949	1.9213	7	7	7	0.4348	-7.50	2.2918	713	-10.50	0
FBgn0003863	FBtr0088161	0.8493	0	0	0	0.5556	NA	0.7789	27	NA	NA
FBgn0003865	FBtr0073582	2.5814	0	0	0	0.4722	NA	-0.2009	36	NA	NA
FBgn0003866	FBtr0085906	0.7158	6	6	5	0.4279	0.00	3.3256	1213	-8.90	0
FBgn0003867	FBtr0084165	0.3617	0	0	0	0.4800	-11.30	-0.8989	75	-9.60	0
FBgn0003870	FBtr0085830	0.7701	3	3	2	0.5119	-4.30	-0.7630	252	-9.70	0
FBgn0003882	FBtr0302338	0.9912	2	2	2	0.4787	-12.80	2.9796	188	-12.30	0
FBgn0003884	FBtr0081639	0.6392	0	0	0	0.4196	-2.00	1.0044	143	-5.30	0
FBgn0003885	FBtr0081538	0.6851	2	2	2	0.4111	-3.10	1.7565	506	-4.60	0
FBgn0003886	FBtr0082087	0.8817	0	0	0	0.4118	-0.10	1.7857	102	-8.50	0
FBgn0003887	FBtr0086536	0.9236	0	0	0	0.3243	0.00	3.8795	111	-5.90	0
FBgn0003888	FBtr0072270	0.5995	0	0	0	0.5124	-1.40	2.7658	201	-5.30	0
FBgn0003890	FBtr0300611	0.7624	1	1	1	0.4541	-4.40	2.1937	229	-5.80	0
FBgn0003891	FBtr0071582	0.4319	0	0	0	0.4404	0.00	1.9850	495	-3.20	0
FBgn0003892	FBtr0089427	0.5402	7	7	6	0.4618	-9.00	2.7913	773	-9.40	0
FBgn0003896	FBtr0081112	1.2456	3	3	3	0.5021	-6.90	-1.3549	466	-6.40	0
FBgn0003900	FBtr0100130	1.9635	0	0	0	0.4348	-3.30	0.1112	161	-8.40	0
FBgn0003941	FBtr0077470	0.6956	0	0	0	0.4375	-6.50	-0.4896	64	-2.90	0
FBgn0003942	FBtr0080016	0.4635	0	0	0	0.4000	-14.00	2.0860	55	-5.10	0
FBgn0003943	FBtr0333142	1.0526	0	0	0	0.3171	0.00	3.2732	123	-3.20	0
FBgn0003944	FBtr0083351	0.7951	2	2	1	0.3655	-4.30	1.6668	963	-6.10	0
FBgn0003950	FBtr0340040	0.5783	2	2	2	0.4784	-6.50	-0.2400	485	-3.00	0
FBgn0003963	FBtr0329895	0.6878	1	1	0	0.4437	-3.20	2.3474	302	-11.90	0
FBgn0003964	FBtr0070346	0.4363	2	2	1	0.5063	0.00	0.6599	399	-6.10	1
FBgn0003965	FBtr0073386	0.9551	0	0	0	0.6071	-9.50	1.9459	56	-9.80	0
FBgn0003969	FBtr0074140	0.9443	3	3	3	0.3835	-2.20	2.6045	352	-8.00	0
FBgn0003977	FBtr0072037	0.3447	0	0	0	0.3663	-1.50	3.1515	101	-4.00	0
FBgn0003978	FBtr0081347	0.9888	1	1	0	0.4938	-5.50	0.1590	81	-6.40	0
FBgn0003979	FBtr0333232	0.0108	0	0	0	0.5309	-0.10	3.1367	81	-3.70	0
FBgn0003980	FBtr0345439	0.0225	0	0	0	0.5161	-2.30	1.9301	62	-0.80	0
FBgn0003984	FBtr0077082	1.0744	11	11	11	0.4625	-6.50	0.6616	2106	-11.80	0
FBgn0003996	FBtr0070490	0.5318	0	0	0	0.4494	-7.00	0.1551	158	-8.20	0
FBgn0003997	FBtr0332862	0.5116	2	2	2	0.3545	0.00	2.9299	519	-3.70	0
FBgn0004003	FBtr0086510	1.3900	0	0	0	0.4844	-8.60	1.7167	64	-6.40	0
FBgn0004009	FBtr0079432	0.8833	7	7	6	0.4296	-3.80	2.0345	433	-6.20	0
FBgn0004028	FBtr0074520	2.0013	0	0	0	0.3786	0.00	4.6558	140	-6.90	0
FBgn0004045	FBtr0071419	0.0178	0	0	0	0.5231	-2.10	1.2157	65	-8.70	0
FBgn0004049	FBtr0082793	1.2689	2	2	2	0.4508	-0.40	2.9642	712	-11.30	1
FBgn0004050	FBtr0100380	0.6561	3	3	3	0.4692	-0.30	-0.7470	341	-9.90	1
FBgn0004052	FBtr0075549	21.6480	0	0	0	0.4286	-2.30	-1.4674	63	-1.90	0
FBgn0004053	FBtr0081670	5.7898	0	0	0	0.4130	-3.30	1.7328	46	-3.30	0
FBgn0004054	FBtr0081671	7.1125	0	0	0	0.4355	-3.70	3.3656	62	-4.60	0
FBgn0004055	FBtr0072397	2.4411	3	3	3	0.4297	-0.30	1.8818	263	-6.20	0
FBgn0004057	FBtr0074748	0.9870	0	0	0	0.4971	-2.20	3.1108	350	-15.60	0
FBgn0004066	FBtr0074210	3.1431	0	0	0	0.3851	-2.90	2.8845	148	-1.40	0
FBgn0004087	FBtr0083295	1.5730	0	0	0	0.3704	NA	-0.2935	27	NA	NA
FBgn0004101	FBtr0072271	1.4212	0	0	0	0.5077	-9.90	1.8496	388	-13.50	0
FBgn0004102	FBtr0331738	2.0833	0	0	0	0.4981	-7.40	-1.2359	528	-5.30	0
FBgn0004103	FBtr0082595	2.0553	0	0	0	0.4847	-4.80	3.1706	229	-12.30	0
FBgn0004106	FBtr0080051	3.5550	0	0	0	0.3412	-2.20	0.0553	85	-4.90	0
FBgn0004107	FBtr0083922	1.5792	0	0	0	0.3378	-4.90	-2.6819	74	-3.70	0
FBgn0004108	FBtr0075323	1.9101	0	0	0	0.3795	-2.70	2.2844	166	-6.90	0
FBgn0004110	FBtr0084086	1.1260	0	0	0	0.4963	-7.80	-0.9475	270	-4.50	0
FBgn0004117	FBtr0345212	1.0861	0	0	0	0.3377	-0.70	2.9796	77	-1.70	0
FBgn0004118	FBtr0084681	0.3368	1	1	1	0.3529	-2.80	4.0480	136	-8.80	0
FBgn0004132	FBtr0088953	2.5030	1	0	0	0.4079	-0.40	2.0203	76	-12.20	0
FBgn0004133	FBtr0310050	0.3169	2	2	2	0.4533	-1.20	0.5149	375	-4.30	0
FBgn0004143	FBtr0299565	4.7802	0	0	0	0.3182	-2.50	3.9037	110	-3.70	0
FBgn0004167	FBtr0300017	0.2955	0	0	0	0.4150	-1.90	0.1811	147	-5.60	0
FBgn0004169	FBtr0345131	0.8723	2	2	2	0.5164	-9.70	2.3151	275	-3.50	1
FBgn0004170	FBtr0070073	5.2338	0	0	0	0.3590	-4.50	-2.9591	117	-4.40	0
FBgn0004177	FBtr0079525	2.5100	0	0	0	0.4402	-1.40	-0.2418	259	-9.40	0
FBgn0004179	FBtr0078494	3.9475	0	0	0	0.4649	-5.00	1.1087	185	-1.50	0
FBgn0004197	FBtr0085128	0.7338	0	0	0	0.4286	-2.70	1.2655	434	-9.20	0
FBgn0004198	FBtr0071068	0.6681	3	3	3	0.3284	0.00	-2.9244	268	-2.20	0
FBgn0004227	FBtr0074233	1.6106	0	0	0	0.3178	0.00	3.8336	129	-5.40	0
FBgn0004228	FBtr0075602	3.3223	0	0	0	0.3465	-1.70	2.4716	101	-5.60	0
FBgn0004237	FBtr0300590	1.2506	0	0	0	0.3819	-9.30	0.7503	144	-4.00	0
FBgn0004242	FBtr0343993	1.2205	0	0	0	0.4910	-0.40	3.6466	442	-5.90	0
FBgn0004359	FBtr0085065	0.6828	5	5	5	0.4385	-9.00	0.5554	659	-3.10	0
FBgn0004360	FBtr0088512	0.2772	15	14	7	0.4874	-7.40	0.1786	1032	-8.00	0
FBgn0004362	FBtr0301410	1.8787	0	0	0	0.3262	-1.20	1.3594	141	-4.00	0
FBgn0004363	FBtr0305260	2.2657	0	0	0	0.3429	NA	3.4786	35	NA	NA
FBgn0004364	FBtr0086309	0.7954	3	2	2	0.4091	-2.10	3.6703	374	-5.50	0
FBgn0004367	FBtr0074271	0.2617	0	0	0	0.4286	-8.40	3.3592	63	-13.70	0
FBgn0004368	FBtr0070724	0.9027	8	8	8	0.3792	-5.20	2.8388	298	-3.40	0
FBgn0004369	FBtr0085423	0.7834	1	1	1	0.3724	-3.70	3.6965	196	-3.90	0
FBgn0004370	FBtr0330392	1.7662	3	3	3	0.3992	0.00	3.3196	521	-6.00	0
FBgn0004373	FBtr0072516	1.1883	13	13	12	0.4696	-0.30	4.3264	1184	-4.60	0
FBgn0004374	FBtr0081332	0.7564	0	0	0	0.3500	0.00	1.1182	100	0.00	0
FBgn0004378	FBtr0072733	1.2548	0	0	0	0.4185	-3.20	2.7158	270	-0.10	0
FBgn0004379	FBtr0076499	0.9166	1	1	1	0.4074	-2.80	1.8533	162	-1.80	0
FBgn0004380	FBtr0077157	0.8426	1	1	1	0.4275	-3.70	0.6916	138	-5.20	0
FBgn0004381	FBtr0076030	0.6036	0	0	0	0.4511	-7.90	-0.0327	184	-5.70	0
FBgn0004387	FBtr0085211	0.5764	8	8	7	0.4424	-1.70	2.7193	773	-6.50	0
FBgn0004389	FBtr0085754	6.1159	0	0	0	0.4348	NA	3.2425	23	NA	NA
FBgn0004390	FBtr0076368	1.2082	5	5	5	0.4249	-12.00	1.6633	473	-2.40	0
FBgn0004391	FBtr0074077	0.3981	1	1	1	0.3585	-6.60	0.4178	106	-4.00	0
FBgn0004394	FBtr0080393	0.8718	1	1	1	0.3575	-2.40	2.5133	193	-6.60	0
FBgn0004395	FBtr0084403	3.4009	0	0	0	0.4211	NA	1.6090	19	NA	NA
FBgn0004396	FBtr0075558	1.0405	8	8	8	0.3535	-5.70	1.8760	1007	-3.90	0
FBgn0004397	FBtr0070420	0.8977	0	0	0	0.4858	-1.60	3.2888	212	-11.60	0
FBgn0004400	FBtr0086897	0.5940	0	0	0	0.5000	NA	-1.8812	40	NA	0
FBgn0004401	FBtr0304977	0.8791	0	0	0	0.4718	-4.90	3.2149	142	-9.40	0
FBgn0004403	FBtr0071094	0.2534	0	0	0	0.4138	-6.30	1.8234	58	-3.90	0
FBgn0004404	FBtr0071096	0.3549	0	0	0	0.5238	-5.60	1.8475	63	-5.60	0
FBgn0004406	FBtr0080571	0.3725	1	1	1	0.4815	-11.70	-0.9673	81	-9.70	0
FBgn0004407	FBtr0091627	0.4687	2	2	2	0.5535	-7.30	0.9100	477	-7.00	0
FBgn0004419	FBtr0079975	3.1065	1	1	1	0.3179	0.00	1.3586	195	-6.10	0
FBgn0004428	FBtr0072630	0.3792	0	0	0	0.4000	-5.30	4.3264	125	-5.20	0
FBgn0004432	FBtr0074238	2.3939	0	0	0	0.5294	NA	2.1214	34	NA	NA
FBgn0004435	FBtr0087831	1.5156	5	5	5	0.4761	-5.70	0.1124	502	-8.80	0
FBgn0004436	FBtr0306106	6.6778	0	0	0	0.4516	-6.70	2.9685	186	-4.90	0
FBgn0004449	FBtr0078509	0.7076	6	6	6	0.5320	-12.40	1.2954	671	-4.70	0
FBgn0004456	FBtr0073732	1.0716	1	1	1	0.3551	0.00	1.2381	352	-9.80	0
FBgn0004462	FBtr0074634	1.2721	0	0	0	0.4973	-1.70	-4.1492	368	-10.60	0
FBgn0004463	FBtr0087977	0.5202	0	0	0	0.3205	-1.30	3.2274	78	-3.40	0
FBgn0004465	FBtr0075359	1.0170	0	0	0	0.3659	-3.40	-1.1649	82	-10.20	0
FBgn0004507	FBtr0100485	0.7026	0	0	0	0.5377	-0.70	2.0402	199	-8.80	0
FBgn0004509	FBtr0089985	1.3919	7	7	5	0.4256	-2.70	2.6242	672	-6.50	0
FBgn0004510	FBtr0085088	0.7838	0	0	0	0.3810	-3.30	0.4527	126	-5.20	0
FBgn0004511	FBtr0073612	1.5394	0	0	0	0.4456	-1.20	2.9941	799	-10.50	0
FBgn0004512	FBtr0087801	1.2053	1	1	1	0.4391	-5.90	3.3004	230	-5.30	0
FBgn0004516	FBtr0332980	0.7924	0	0	0	0.5714	-9.30	2.2465	196	-9.30	0
FBgn0004554	FBtr0083502	0.2136	0	0	0	0.4118	NA	2.3533	34	NA	NA
FBgn0004556	FBtr0075347	2.2610	0	0	0	0.3452	-1.10	0.9505	84	-4.70	0
FBgn0004567	FBtr0077500	0.9439	4	4	4	0.3743	-5.30	1.3828	358	-2.10	0
FBgn0004569	FBtr0075408	1.4422	2	2	2	0.4495	-0.10	0.3336	574	-7.40	0
FBgn0004574	FBtr0073263	0.9210	0	0	0	0.3791	-3.00	2.8543	182	-0.10	0
FBgn0004575	FBtr0089475	0.4555	0	0	0	0.4892	-16.80	-0.4417	558	-5.80	0
FBgn0004577	FBtr0089287	0.7035	0	0	0	0.4612	-4.70	-0.0274	399	-5.20	0
FBgn0004581	FBtr0072232	0.1937	0	0	0	0.4234	-7.50	2.1649	222	-2.00	0
FBgn0004583	FBtr0078059	0.4766	8	8	8	0.4380	-7.80	0.1858	936	-4.80	0
FBgn0004584	FBtr0077678	0.7294	0	0	0	0.4455	-1.60	1.4349	211	-6.90	0
FBgn0004587	FBtr0082801	1.1537	0	0	0	0.4545	-3.60	0.3282	154	-6.10	0
FBgn0004595	FBtr0304605	0.8317	0	0	0	0.5132	-13.00	-2.5986	302	-5.90	0
FBgn0004597	FBtr0083010	1.3973	0	0	0	0.4324	-7.00	2.8303	148	-8.90	0
FBgn0004598	FBtr0301301	0.7288	3	3	3	0.4224	-3.90	1.3856	232	-9.70	0
FBgn0004606	FBtr0085701	0.9999	2	2	2	0.4888	-5.20	0.2875	358	-9.80	0
FBgn0004607	FBtr0307167	2.0180	3	3	3	0.4029	-0.80	-2.0680	417	-6.40	0
FBgn0004611	FBtr0330673	0.4614	8	8	8	0.4405	-2.90	-0.6928	740	-8.90	0
FBgn0004629	FBtr0082980	2.6309	0	0	0	0.5278	NA	3.2670	36	NA	NA
FBgn0004635	FBtr0072694	0.6253	2	2	2	0.4252	-3.10	1.4916	341	-9.70	0
FBgn0004636	FBtr0072867	1.3459	0	0	0	0.4581	-0.50	0.5323	644	-6.00	0
FBgn0004638	FBtr0087694	3.6635	0	0	0	0.4213	-4.30	4.2987	254	-8.50	0
FBgn0004643	FBtr0070441	0.3817	0	0	0	0.4434	-4.10	0.3530	106	-3.80	0
FBgn0004644	FBtr0100506	0.5592	1	1	0	0.4182	-1.70	1.2929	385	-2.20	0
FBgn0004646	FBtr0071036	0.6789	3	3	3	0.4305	-2.70	2.5267	676	-12.60	0
FBgn0004647	FBtr0070507	1.6304	7	7	7	0.4311	-2.50	1.3671	798	-8.00	0
FBgn0004648	FBtr0344739	1.4517	0	0	0	0.4872	-2.50	1.4238	195	-4.00	0
FBgn0004649	FBtr0073898	0.9180	0	0	0	0.4364	-1.70	-1.7073	165	-9.60	0
FBgn0004654	FBtr0331410	0.3363	0	0	0	0.4091	-3.90	2.1397	44	-3.90	0
FBgn0004655	FBtr0070430	0.7841	1	1	1	0.5668	-13.40	-2.7969	1018	-5.50	0
FBgn0004656	FBtr0071119	0.7613	3	3	3	0.4992	-1.40	2.4454	637	-5.30	1
FBgn0004657	FBtr0071105	1.5093	0	0	0	0.5528	-0.70	0.8964	199	-1.70	0
FBgn0004666	FBtr0082710	0.8946	1	1	1	0.4300	-1.80	2.5239	100	-9.60	0
FBgn0004687	FBtr0070783	2.8139	0	0	0	0.3500	-4.80	1.3373	120	-2.40	0
FBgn0004698	FBtr0087374	0.9214	2	2	2	0.4111	-0.60	1.1573	270	-2.00	0
FBgn0004777	FBtr0081689	1.2429	0	0	0	0.3913	-1.90	3.5023	46	-4.40	0
FBgn0004779	FBtr0081694	0.3085	0	0	0	0.4000	-1.60	2.3003	55	-5.20	0
FBgn0004780	FBtr0081690	0.5977	0	0	0	0.4394	-3.30	4.6558	66	-1.00	0
FBgn0004781	FBtr0081693	1.6412	0	0	0	0.4944	-0.40	0.1334	89	-6.20	0
FBgn0004795	FBtr0340030	1.5168	2	2	2	0.3830	-2.30	2.9444	141	-7.50	0
FBgn0004797	FBtr0080915	1.9050	0	0	0	0.4375	-7.50	2.7001	144	-6.50	0
FBgn0004811	FBtr0081317	2.7177	1	1	0	0.4476	-1.20	3.6965	105	-6.70	0
FBgn0004828	FBtr0071345	3.4889	0	0	0	0.3070	-1.40	3.1469	114	-1.30	0
FBgn0004832	FBtr0070670	1.3772	0	0	0	0.3462	-5.40	1.0930	78	-0.90	0
FBgn0004837	FBtr0346621	1.8728	3	3	3	0.4232	-3.10	-0.1022	449	-2.80	0
FBgn0004838	FBtr0079346	0.9808	1	1	1	0.3617	-2.50	2.0652	376	-3.80	0
FBgn0004839	FBtr0088028	0.7301	9	9	9	0.4667	-5.30	-1.6965	917	-3.30	0
FBgn0004854	FBtr0074429	0.3156	0	0	0	0.4602	-10.10	-0.9427	289	-10.80	0
FBgn0004855	FBtr0082925	3.5949	0	0	0	0.4651	-2.70	0.9463	43	-2.50	0
FBgn0004856	FBtr0071350	1.2402	0	0	0	0.3949	0.00	-0.9668	157	-3.60	0
FBgn0004858	FBtr0080637	0.9240	6	6	6	0.3890	-0.70	2.2412	1113	-6.00	0
FBgn0004859	FBtr0089178	2.2208	6	6	6	0.3089	-4.10	1.8220	463	-5.30	0
FBgn0004860	FBtr0112843	1.0025	9	9	9	0.5181	-3.20	0.8276	801	-5.30	0
FBgn0004861	FBtr0301515	0.8455	6	6	6	0.5544	-3.20	0.8276	1084	-5.30	0
FBgn0004862	FBtr0084087	0.2811	0	0	0	0.3926	-0.80	2.2121	135	-6.10	0
FBgn0004863	FBtr0084111	0.7537	0	0	0	0.4669	-11.70	3.6902	272	-4.60	0
FBgn0004864	FBtr0073457	0.7632	3	3	3	0.5236	-3.80	-3.4818	636	-5.30	0
FBgn0004865	FBtr0078307	0.6819	1	1	1	0.4346	-7.60	2.4154	573	-8.40	0
FBgn0004867	FBtr0079905	0.1388	0	0	0	0.4000	-3.40	4.2089	50	-1.90	0
FBgn0004868	FBtr0079862	0.7539	0	0	0	0.4309	-7.40	1.9632	181	-9.00	0
FBgn0004872	FBtr0080166	1.9275	0	0	0	0.3977	-2.90	2.9751	88	-2.10	0
FBgn0004875	FBtr0073152	0.6804	4	4	4	0.4340	-1.70	-1.2535	265	-2.40	0
FBgn0004876	FBtr0083716	0.4323	13	13	12	0.4400	-13.60	3.2488	1100	-5.30	0
FBgn0004878	FBtr0078725	0.1882	0	0	0	0.4404	-4.40	3.6965	193	-10.70	0
FBgn0004880	FBtr0073165	0.2537	8	7	2	0.4024	0.00	1.4746	1168	-5.70	0
FBgn0004882	FBtr0084384	0.3509	1	1	0	0.4835	-2.50	2.3474	908	0.00	0
FBgn0004885	FBtr0339252	1.0767	2	2	2	0.4475	-5.00	-0.0376	324	-10.30	0
FBgn0004888	FBtr0073151	1.5801	0	0	0	0.4074	-1.20	0.8790	108	-7.00	0
FBgn0004889	FBtr0082191	0.9299	2	2	2	0.4177	-6.00	3.1313	407	-8.40	0
FBgn0004892	FBtr0077558	1.1735	5	5	5	0.4034	-9.70	-4.5707	590	-1.40	0
FBgn0004893	FBtr0077491	0.5975	3	3	3	0.3920	-5.10	0.4028	352	-8.70	0
FBgn0004895	FBtr0073192	1.2826	0	0	0	0.3563	-3.30	2.9685	174	-2.80	0
FBgn0004898	FBtr0084771	1.4572	0	0	0	0.3679	-7.20	0.9969	106	-0.30	0
FBgn0004901	FBtr0304705	0.5590	0	0	0	0.5054	-6.90	3.0384	93	-10.70	0
FBgn0004903	FBtr0100338	1.2676	1	1	0	0.3769	-3.70	3.6820	130	-5.90	0
FBgn0004907	FBtr0332917	4.1091	0	0	0	0.3975	0.00	4.0480	161	-3.90	0
FBgn0004908	FBtr0081838	3.4365	0	0	0	0.2785	-5.40	-1.0504	79	-0.40	0
FBgn0004910	FBtr0303421	2.3332	0	0	0	0.5000	-6.60	-1.2981	132	-9.90	0
FBgn0004913	FBtr0078837	0.4154	0	0	0	0.4130	-6.80	0.0719	92	-8.70	0
FBgn0004914	FBtr0079748	0.4537	0	0	0	0.2667	NA	3.2504	15	NA	NA
FBgn0004915	FBtr0080025	3.9926	0	0	0	0.3385	-5.70	0.4858	65	-10.10	0
FBgn0004921	FBtr0088647	2.1691	0	0	0	0.6042	-6.30	1.7074	48	-9.20	0
FBgn0004924	FBtr0074005	1.2738	0	0	0	0.4536	-3.20	3.2172	302	-6.70	0
FBgn0004926	FBtr0075968	1.4429	1	1	1	0.4219	-3.10	3.3004	128	-8.40	0
FBgn0004956	FBtr0112847	0.6821	2	2	2	0.4902	-8.40	-0.6379	461	-9.20	0
FBgn0004957	FBtr0310487	0.2371	0	0	0	0.4898	-7.30	-1.0084	98	-4.50	0
FBgn0004959	FBtr0342846	0.7942	0	0	0	0.5204	-0.60	-0.7077	196	-13.80	0
FBgn0005198	FBtr0074819	0.6700	0	0	0	0.5156	-3.00	1.9218	128	-4.10	0
FBgn0005278	FBtr0089432	1.9283	1	1	0	0.4613	0.00	2.9941	388	-3.10	0
FBgn0005322	FBtr0080065	2.3915	1	1	1	0.4595	-6.50	3.2212	111	-14.70	0
FBgn0005355	FBtr0082665	0.8218	1	1	0	0.4000	NA	1.4405	30	NA	NA
FBgn0005386	FBtr0306009	0.6944	5	5	5	0.4718	0.00	1.2092	390	-2.10	0
FBgn0005391	FBtr0339648	0.0141	0	0	0	0.4314	-4.80	2.9947	51	-4.40	0
FBgn0005411	FBtr0307178	1.5725	0	0	0	0.2901	-3.00	2.2003	162	-1.70	0
FBgn0005427	FBtr0089441	0.3599	6	6	6	0.4403	-5.90	4.2481	561	-8.00	0
FBgn0005533	FBtr0076479	0.4784	0	0	0	0.4167	-5.40	2.7676	60	-4.60	0
FBgn0005536	FBtr0308212	0.8720	3	3	3	0.4509	-15.00	2.5267	743	-6.10	0
FBgn0005558	FBtr0100396	0.4636	7	7	7	0.4358	-3.80	0.0804	514	-4.80	0
FBgn0005561	FBtr0100345	1.9546	0	0	0	0.3425	-1.40	-4.7797	292	-7.60	0
FBgn0005564	FBtr0074973	0.3957	2	2	2	0.4952	-2.90	-0.3080	622	-4.60	0
FBgn0005585	FBtr0082103	0.9812	0	0	0	0.4767	-7.30	-1.5762	86	-3.40	0
FBgn0005586	FBtr0088257	1.2364	1	1	1	0.4863	-1.90	2.8190	619	-5.10	0
FBgn0005590	FBtr0081261	8.6043	1	1	1	0.3913	-4.50	3.2959	46	-4.50	0
FBgn0005592	FBtr0100676	0.4872	2	2	2	0.4545	-9.10	0.9857	220	-6.70	0
FBgn0005593	FBtr0079946	0.2732	0	0	0	0.4286	-4.40	1.7108	49	-1.70	0
FBgn0005596	FBtr0085415	0.3087	3	3	1	0.5059	-2.60	0.5211	678	-6.60	1
FBgn0005612	FBtr0072158	0.4879	3	3	3	0.5205	-8.80	2.0335	317	-4.60	0
FBgn0005616	FBtr0077570	0.4502	3	3	3	0.5029	-6.90	1.7074	340	-7.80	0
FBgn0005617	FBtr0343118	1.1712	2	2	2	0.4480	-6.10	0.2194	375	-4.30	0
FBgn0005624	FBtr0345375	1.1556	7	6	5	0.4517	-1.50	0.0570	1005	-3.80	0
FBgn0005626	FBtr0076957	1.6168	0	0	0	0.4071	-0.30	3.9013	452	-2.90	0
FBgn0005630	FBtr0089347	1.0697	3	3	3	0.4312	0.00	2.5755	545	-5.20	0
FBgn0005631	FBtr0071922	0.9935	1	1	1	0.4571	-2.10	1.4891	175	-6.90	0
FBgn0005632	FBtr0085843	1.3250	0	0	0	0.5164	-9.60	2.2924	457	-4.70	0
FBgn0005636	FBtr0072267	0.3261	3	3	3	0.5215	-6.70	3.9187	395	-5.60	0
FBgn0005638	FBtr0072272	1.1989	3	3	3	0.4804	-2.40	1.5244	537	-6.60	0
FBgn0005640	FBtr0073132	1.1837	1	1	1	0.5035	-1.10	1.3668	429	-11.50	0
FBgn0005642	FBtr0085356	0.9387	2	2	2	0.5079	-8.10	-2.5887	252	-3.40	0
FBgn0005648	FBtr0088786	1.4715	1	1	1	0.3941	-2.20	1.9282	406	-6.50	0
FBgn0005649	FBtr0084592	2.1987	3	3	3	0.3923	-1.90	1.2496	915	-9.20	0
FBgn0005654	FBtr0087769	0.7631	0	0	0	0.4651	-4.30	0.0363	129	-4.10	0
FBgn0005655	FBtr0086308	1.8425	0	0	0	0.3483	0.00	1.7608	89	-8.20	0
FBgn0005666	FBtr0334483	0.9348	0	0	0	0.4429	-4.70	1.1472	140	-3.00	0
FBgn0005671	FBtr0301661	0.7388	0	0	0	0.4522	-6.30	2.7397	115	-6.90	0
FBgn0005672	FBtr0081267	0.7503	4	4	4	0.3900	-3.50	-0.9258	359	-3.50	0
FBgn0005674	FBtr0084511	0.5969	0	0	0	0.4340	-3.00	1.5679	106	-4.60	0
FBgn0005677	FBtr0080875	0.8105	5	5	5	0.4577	-0.90	-0.4677	627	-3.00	0
FBgn0005683	FBtr0080046	0.5522	2	2	2	0.3577	-5.30	0.4702	137	-3.70	0
FBgn0005694	FBtr0330156	1.4402	7	7	7	0.4463	-2.10	-3.1675	475	-9.30	0
FBgn0005695	FBtr0088710	0.6503	2	2	2	0.4087	-4.80	0.8525	230	-3.10	0
FBgn0005696	FBtr0114543	0.8270	0	0	0	0.4144	-1.80	-1.9888	111	-10.00	0
FBgn0005771	FBtr0342913	1.0173	0	0	0	0.4160	-3.60	-0.0943	387	-3.70	0
FBgn0005775	FBtr0073375	0.8133	0	0	0	0.4607	-7.40	0.3409	471	-4.00	0
FBgn0005777	FBtr0082129	2.1886	0	0	0	0.2131	0.00	2.5093	61	0.00	0
FBgn0008635	FBtr0074576	0.3553	0	0	0	0.4832	-5.10	1.8312	149	-6.00	0
FBgn0008636	FBtr0071556	1.5422	0	0	0	0.3975	-10.50	-1.0300	322	-8.60	0
FBgn0010014	FBtr0308348	1.8678	0	0	0	0.4078	-2.90	1.4916	103	-8.50	0
FBgn0010019	FBtr0070099	1.2311	0	0	0	0.4953	-1.80	2.2466	107	-13.50	0
FBgn0010041	FBtr0082572	0.7495	0	0	0	0.4194	NA	3.2511	31	NA	NA
FBgn0010044	FBtr0082575	1.1256	0	0	0	0.4286	NA	1.7180	28	NA	NA
FBgn0010051	FBtr0344265	0.1858	0	0	0	0.5194	-9.40	1.7765	1057	-6.60	0
FBgn0010052	FBtr0301751	1.8369	0	0	0	0.5093	-4.10	-1.3379	108	-9.40	0
FBgn0010053	FBtr0086625	1.4945	0	0	0	0.5294	NA	-0.7276	34	NA	NA
FBgn0010078	FBtr0071897	0.2728	0	0	0	0.4627	-4.00	4.0480	67	-6.40	0
FBgn0010097	FBtr0332572	1.9702	0	0	0	0.3784	-1.50	3.3394	74	-2.90	0
FBgn0010100	FBtr0081473	0.8739	0	0	0	0.4298	-10.40	1.2018	121	-9.10	0
FBgn0010105	FBtr0075579	1.0995	1	1	1	0.4336	0.00	2.7001	226	-4.60	0
FBgn0010109	FBtr0088803	2.0680	1	1	0	0.3652	-1.50	4.2089	282	-8.20	0
FBgn0010113	FBtr0085619	1.2823	5	4	3	0.3646	-1.60	-3.1933	1012	-6.20	0
FBgn0010114	FBtr0088606	0.4555	0	0	0	0.4704	-4.70	0.1999	355	-12.70	0
FBgn0010173	FBtr0081867	1.2331	1	1	1	0.3580	-4.30	4.6558	81	-0.70	0
FBgn0010194	FBtr0074623	1.1927	6	6	6	0.3852	-1.40	0.6603	553	-5.30	0
FBgn0010198	FBtr0300828	0.6804	0	0	0	0.4348	-3.50	0.4975	69	-4.80	0
FBgn0010213	FBtr0345492	2.0266	0	0	0	0.3492	-3.40	-0.0036	126	-5.80	0
FBgn0010215	FBtr0070038	2.8873	0	0	0	0.3333	-1.70	-4.1328	54	-1.60	0
FBgn0010217	FBtr0089186	1.5728	0	0	0	0.3846	NA	3.3656	26	NA	NA
FBgn0010220	FBtr0088564	1.1076	0	0	0	0.3247	-1.80	2.2918	77	-5.40	0
FBgn0010222	FBtr0081997	1.2349	0	0	0	0.4105	-0.80	3.5964	95	-3.40	0
FBgn0010225	FBtr0078968	0.6916	1	1	0	0.4577	-9.80	2.5252	319	-6.80	0
FBgn0010226	FBtr0087005	1.7672	0	0	0	0.4957	-5.40	1.3308	234	-4.80	0
FBgn0010228	FBtr0071673	2.0280	0	0	0	0.3933	0.00	1.7557	239	-5.70	0
FBgn0010235	FBtr0075951	1.4651	0	0	0	0.3361	-3.90	3.5878	119	-2.90	0
FBgn0010238	FBtr0087933	1.9559	0	0	0	0.4832	-7.80	1.1057	327	-6.30	0
FBgn0010246	FBtr0072675	0.5723	0	0	0	0.4706	-6.30	3.5521	136	-9.00	0
FBgn0010247	FBtr0113885	4.2173	1	1	1	0.2400	-2.40	0.5563	75	-1.40	0
FBgn0010265	FBtr0100541	0.4461	0	0	0	0.3636	NA	3.4923	33	NA	NA
FBgn0010269	FBtr0071313	0.6818	0	0	0	0.4486	-4.30	1.1719	457	-6.30	0
FBgn0010278	FBtr0072242	0.5117	0	0	0	0.4326	-4.60	0.3546	141	-14.80	0
FBgn0010280	FBtr0345951	1.0046	2	2	2	0.5244	-2.00	1.8818	164	-8.50	0
FBgn0010282	FBtr0081719	0.8132	1	1	1	0.4031	0.00	0.2708	129	-3.40	0
FBgn0010287	FBtr0079542	1.9891	0	0	0	0.4211	-4.50	-0.4493	76	-3.30	0
FBgn0010288	FBtr0303459	1.4776	0	0	0	0.3438	-3.00	1.7328	128	-0.10	0
FBgn0010292	FBtr0071090	1.5560	0	0	0	0.3661	-0.50	4.2987	112	-2.00	0
FBgn0010300	FBtr0081159	1.0231	1	1	1	0.4214	-4.70	3.1171	541	0.00	0
FBgn0010303	FBtr0073747	0.6748	4	4	3	0.4544	-2.90	0.4227	658	-7.10	0
FBgn0010309	FBtr0081194	0.2955	1	1	1	0.3488	-1.70	3.3212	86	-5.80	0
FBgn0010313	FBtr0308120	0.9524	5	5	5	0.4346	-2.40	1.6225	1047	-4.90	0
FBgn0010314	FBtr0079799	4.2339	0	0	0	0.4452	-7.80	1.8075	292	-1.70	0
FBgn0010315	FBtr0300391	1.8538	4	4	3	0.4093	-6.30	0.9806	259	-4.90	0
FBgn0010316	FBtr0088469	1.2514	0	0	0	0.4297	-2.70	3.2014	619	-7.80	0
FBgn0010317	FBtr0073127	0.6756	0	0	0	0.3874	-3.70	1.8950	111	-2.00	0
FBgn0010323	FBtr0343220	0.6501	0	0	0	0.4927	-9.60	0.4596	479	-6.40	1
FBgn0010328	FBtr0085178	0.7501	5	5	5	0.4658	-1.40	2.9202	380	-3.80	0
FBgn0010333	FBtr0072730	1.6393	0	0	0	0.5045	-3.70	0.5858	337	-5.70	0
FBgn0010339	FBtr0087976	1.2788	1	1	1	0.3920	-8.60	0.1681	125	-4.40	0
FBgn0010340	FBtr0337095	2.6131	0	0	0	0.3750	-0.30	3.5042	72	-7.40	0
FBgn0010341	FBtr0309214	2.3978	0	0	0	0.4684	-1.10	2.1922	158	-4.10	0
FBgn0010342	FBtr0088530	2.3570	0	0	0	0.4877	-10.50	2.0607	162	-4.30	0
FBgn0010348	FBtr0078571	4.0902	1	1	1	0.4310	0.00	0.8680	290	-3.70	0
FBgn0010350	FBtr0076688	1.9939	1	1	1	0.4927	-0.70	1.3330	205	-10.50	0
FBgn0010352	FBtr0075268	0.7000	0	0	0	0.3538	-4.20	3.2495	65	-6.50	0
FBgn0010355	FBtr0081684	0.7420	1	1	1	0.4356	-1.90	2.9020	101	-9.40	0
FBgn0010356	FBtr0088240	1.0931	0	0	0	0.3676	0.00	2.4987	68	-0.70	0
FBgn0010379	FBtr0083227	1.2844	2	2	2	0.4917	-3.50	1.3577	720	-1.10	0
FBgn0010380	FBtr0074789	1.1877	0	0	0	0.4505	-4.30	1.8312	111	-5.70	0
FBgn0010381	FBtr0073073	0.2425	0	0	0	0.3968	-1.60	1.9632	63	-1.20	0
FBgn0010382	FBtr0080777	1.0264	5	5	5	0.3815	-3.00	-1.2389	747	-7.70	0
FBgn0010383	FBtr0074610	0.9221	0	0	0	0.4976	-8.10	0.6655	824	-9.30	0
FBgn0010387	FBtr0076916	2.1197	0	0	0	0.3448	NA	1.8234	29	NA	NA
FBgn0010389	FBtr0083550	1.3817	6	6	6	0.4765	-4.00	3.5023	787	-2.50	0
FBgn0010391	FBtr0073480	0.3423	2	2	0	0.4779	-6.60	2.2848	113	-6.60	0
FBgn0010395	FBtr0346711	1.5032	0	0	0	0.3960	-3.80	2.5093	101	-7.30	0
FBgn0010397	FBtr0087512	0.6464	0	0	0	0.3630	-1.10	3.3149	146	-4.70	0
FBgn0010398	FBtr0080092	1.6419	1	1	1	0.3846	-5.50	0.5695	91	-7.30	0
FBgn0010406	FBtr0076752	3.0870	0	0	0	0.3086	-0.80	3.6466	81	-4.50	0
FBgn0010407	FBtr0079978	1.5531	0	0	0	0.3145	-3.50	2.0293	124	-1.40	0
FBgn0010408	FBtr0342577	0.2169	0	0	0	0.5556	NA	1.9157	27	NA	NA
FBgn0010409	FBtr0086947	0.2805	0	0	0	0.5000	NA	3.2008	36	NA	NA
FBgn0010411	FBtr0086274	0.5624	0	0	0	0.3684	NA	3.3592	38	NA	NA
FBgn0010412	FBtr0074311	0.3734	0	0	0	0.3529	NA	1.8006	34	NA	NA
FBgn0010415	FBtr0273206	2.1852	1	1	1	0.3988	-1.70	2.1678	336	-6.80	0
FBgn0010416	FBtr0340315	1.1904	2	2	2	0.1786	-2.00	3.8492	84	-0.50	0
FBgn0010417	FBtr0074941	0.8939	0	0	0	0.4444	-3.30	0.7737	72	-13.40	0
FBgn0010421	FBtr0082310	3.9299	0	0	0	0.3524	-3.30	1.9938	105	-1.30	0
FBgn0010422	FBtr0080722	2.6153	1	1	1	0.4556	-3.60	3.9187	259	-6.10	0
FBgn0010423	FBtr0345540	1.7583	0	0	0	0.4259	-5.50	2.8533	54	-6.60	0
FBgn0010424	FBtr0089585	1.9742	0	0	0	0.4742	-0.70	3.2670	97	-8.60	0
FBgn0010431	FBtr0076613	1.8291	0	0	0	0.3810	-3.20	4.2307	63	-3.90	0
FBgn0010433	FBtr0081828	0.7409	0	0	0	0.5270	-0.80	3.0384	74	-5.60	0
FBgn0010434	FBtr0086509	0.6638	0	0	0	0.4501	-5.30	2.1097	371	-4.30	0
FBgn0010435	FBtr0072402	1.0616	0	0	0	0.5203	-1.80	3.2425	246	-8.00	0
FBgn0010438	FBtr0083277	1.8404	0	0	0	0.2143	NA	2.5330	14	NA	NA
FBgn0010441	FBtr0085179	1.4137	1	1	0	0.5289	-4.50	2.0335	225	-3.00	0
FBgn0010452	FBtr0075890	0.6831	4	4	4	0.3692	0.00	1.7547	585	-6.00	0
FBgn0010453	FBtr0089291	0.2473	7	7	3	0.4139	0.00	1.9340	1162	-10.70	0
FBgn0010470	FBtr0071703	2.4452	0	0	0	0.5906	-7.80	0.6679	149	-9.50	0
FBgn0010473	FBtr0089270	0.4771	3	3	3	0.4948	-3.90	-0.2115	483	-6.30	0
FBgn0010482	FBtr0301424	0.5980	1	1	1	0.3881	-4.00	-0.0004	420	-9.20	0
FBgn0010488	FBtr0087786	0.3859	6	4	3	0.5517	-8.90	-4.2549	2184	-6.20	1
FBgn0010497	FBtr0080292	0.4697	0	0	0	0.4797	-5.00	1.7582	344	-5.20	0
FBgn0010501	FBtr0072062	1.5521	0	0	0	0.4951	-0.80	2.0537	410	-10.00	0
FBgn0010504	FBtr0088811	1.3459	3	3	3	0.5056	-4.80	0.3573	712	-14.60	0
FBgn0010516	FBtr0088082	1.6708	0	0	0	0.4079	-0.20	3.6746	76	-8.10	0
FBgn0010520	FBtr0079874	3.6011	0	0	0	0.3516	-2.80	1.5744	91	-0.50	0
FBgn0010531	FBtr0333068	0.8282	0	0	0	0.3400	-2.10	3.9512	50	-4.70	0
FBgn0010548	FBtr0088993	1.6580	2	2	2	0.4655	-1.60	2.1703	391	-3.40	0
FBgn0010551	FBtr0112862	1.3358	0	0	0	0.4571	-0.20	3.4424	70	-7.00	0
FBgn0010575	FBtr0301551	0.6526	2	2	2	0.3757	-4.50	-0.6292	181	-2.40	0
FBgn0010583	FBtr0332973	1.0290	4	4	3	0.4974	-8.10	-1.1635	770	-12.50	0
FBgn0010590	FBtr0087262	3.4311	0	0	0	0.3187	-3.70	1.7565	91	-3.50	0
FBgn0010591	FBtr0087008	0.9089	0	0	0	0.4845	0.00	0.8070	97	-4.50	0
FBgn0010602	FBtr0078081	2.0171	0	0	0	0.5079	-7.80	1.0254	254	-4.50	0
FBgn0010607	FBtr0079050	3.3001	0	0	0	0.3810	-3.00	2.0339	189	-4.20	0
FBgn0010611	FBtr0087149	0.5723	0	0	0	0.3750	NA	1.7137	40	NA	0
FBgn0010612	FBtr0110872	2.8653	0	0	0	0.3774	-5.00	2.6857	53	-5.00	0
FBgn0010620	FBtr0086909	2.7787	2	2	0	0.4050	-6.40	2.5528	442	-5.40	0
FBgn0010621	FBtr0087987	0.9151	0	0	0	0.3866	-3.00	2.2750	119	-7.60	0
FBgn0010622	FBtr0336732	1.5154	0	0	0	0.3614	0.00	3.1714	83	-3.70	0
FBgn0010638	FBtr0087498	2.1861	0	0	0	0.4961	-5.10	2.9182	129	-4.90	0
FBgn0010651	FBtr0086635	0.8912	2	2	2	0.4543	-0.60	-0.5722	339	-6.10	0
FBgn0010660	FBtr0071996	1.2882	0	0	0	0.4432	-3.60	4.2544	88	-5.50	0
FBgn0010741	FBtr0076238	3.0402	0	0	0	0.4366	-7.00	0.6185	142	-5.60	0
FBgn0010747	FBtr0077169	1.4832	0	0	0	0.5119	-2.40	2.7537	168	-6.00	0
FBgn0010750	FBtr0078868	0.8064	1	1	1	0.4653	-3.90	2.3411	101	-7.70	0
FBgn0010762	FBtr0076263	1.1497	4	4	4	0.4256	-4.00	2.8281	672	-2.00	0
FBgn0010768	FBtr0083733	0.7740	1	1	1	0.5167	-10.20	-4.7341	896	-4.00	0
FBgn0010770	FBtr0084012	1.2243	0	0	0	0.4200	-1.20	2.8241	50	-5.40	0
FBgn0010772	FBtr0078728	0.6639	3	3	3	0.4300	-4.10	3.9293	507	0.00	0
FBgn0010774	FBtr0081642	2.3646	0	0	0	0.4045	-1.20	3.1352	178	-4.60	0
FBgn0010786	FBtr0072679	0.5098	1	1	1	0.4233	-4.00	0.0759	352	-3.80	0
FBgn0010803	FBtr0081981	0.9519	2	2	2	0.3982	-6.30	2.1703	113	-7.10	0
FBgn0010808	FBtr0085745	1.4923	0	0	0	0.4545	-3.80	2.6938	121	-8.20	0
FBgn0010812	FBtr0081788	0.9298	0	0	0	0.4385	-4.30	1.9433	244	-9.30	0
FBgn0010825	FBtr0305699	0.9204	3	3	3	0.4692	-4.00	-1.5017	959	-3.00	0
FBgn0010830	FBtr0078535	0.6088	2	2	2	0.5094	-5.90	-0.4451	212	-9.50	0
FBgn0010877	FBtr0083595	1.4896	5	4	3	0.4534	-6.30	-0.2669	761	-5.00	0
FBgn0010894	FBtr0077136	1.8851	0	0	0	0.4660	-5.00	-0.6984	103	-5.20	0
FBgn0010905	FBtr0304618	1.0205	6	6	6	0.4410	-4.10	1.3428	669	-6.30	0
FBgn0010909	FBtr0333363	1.2108	1	1	1	0.4588	-0.30	4.6558	194	-10.10	0
FBgn0010926	FBtr0083504	1.6480	1	1	1	0.4100	-4.40	3.3067	100	-11.00	0
FBgn0011016	FBtr0075453	0.9125	0	0	0	0.4639	-1.20	3.6509	97	-4.90	0
FBgn0011020	FBtr0081569	0.5736	0	0	0	0.3415	NA	0.5149	41	NA	0
FBgn0011202	FBtr0305961	0.7630	0	0	0	0.4710	-5.10	2.2681	138	-3.30	0
FBgn0011204	FBtr0072706	0.9188	0	0	0	0.4981	-10.50	2.1668	265	-4.20	0
FBgn0011205	FBtr0078186	1.8770	2	2	1	0.5182	-7.30	1.3886	384	-2.80	0
FBgn0011206	FBtr0076541	2.1706	1	1	1	0.4697	-5.60	0.3715	628	-6.30	0
FBgn0011207	FBtr0079847	0.6271	2	2	2	0.5350	-1.70	-0.7012	243	-2.30	0
FBgn0011211	FBtr0071883	0.9619	0	0	0	0.4381	-1.10	3.3256	105	-6.10	0
FBgn0011217	FBtr0310554	11.8177	0	0	0	0.4433	-0.60	2.4339	388	-3.20	0
FBgn0011224	FBtr0300264	2.5065	0	0	0	0.4239	-4.10	0.8724	394	-5.90	0
FBgn0011225	FBtr0084636	0.4731	0	0	0	0.5545	-7.50	2.9887	101	-12.10	0
FBgn0011227	FBtr0087861	6.0720	0	0	0	0.4100	-0.84	3.2164	100	-5.60	0
FBgn0011230	FBtr0079545	0.6293	0	0	0	0.3966	-1.80	1.8581	58	-9.60	0
FBgn0011232	FBtr0079809	0.4199	4	4	4	0.4725	-6.40	-2.6607	309	-2.10	0
FBgn0011236	FBtr0072129	1.0185	4	4	4	0.4341	-3.80	-1.2075	599	-8.50	0
FBgn0011241	FBtr0088453	2.6174	1	1	1	0.3333	-1.00	3.8950	93	-3.00	0
FBgn0011259	FBtr0303879	3.6323	8	8	8	0.3732	-2.00	2.3441	1396	-7.80	0
FBgn0011260	FBtr0345339	1.6811	1	1	1	0.4684	-6.70	1.0433	237	-2.70	0
FBgn0011272	FBtr0100164	0.3982	0	0	0	0.4043	-4.00	3.0846	47	-5.30	0
FBgn0011274	FBtr0081009	1.0425	0	0	0	0.4104	-3.50	-1.6947	212	-7.80	0
FBgn0011283	FBtr0079455	2.2662	0	0	0	0.5000	NA	0.7987	36	NA	NA
FBgn0011284	FBtr0075884	0.3178	0	0	0	0.5268	-7.20	3.1550	112	-6.80	0
FBgn0011286	FBtr0088640	0.2386	0	0	0	0.4658	-13.10	3.2274	146	-2.30	0
FBgn0011289	FBtr0085155	1.5465	0	0	0	0.5291	-7.00	0.8610	172	-12.40	0
FBgn0011290	FBtr0082440	2.7724	0	0	0	0.4110	0.00	1.3703	309	-8.20	0
FBgn0011291	FBtr0079924	1.4585	1	1	1	0.3523	-1.30	-0.3952	88	-6.30	0
FBgn0011296	FBtr0072100	1.0981	0	0	0	0.4412	-2.50	2.5093	68	-5.60	0
FBgn0011297	FBtr0072095	0.3765	0	0	0	0.3797	-0.50	2.8759	79	-6.70	0
FBgn0011300	FBtr0088659	0.4153	3	3	2	0.5371	-12.80	2.9878	633	-4.40	0
FBgn0011305	FBtr0080079	1.5987	0	0	0	0.3824	-3.00	-0.4789	136	-2.50	0
FBgn0011327	FBtr0076472	3.1337	0	0	0	0.3729	-4.20	2.5481	118	-9.70	0
FBgn0011335	FBtr0075991	2.8149	0	0	0	0.3740	-6.00	0.4297	131	-8.40	0
FBgn0011336	FBtr0084786	0.6923	1	1	1	0.4096	-5.40	0.0714	83	-9.20	0
FBgn0011361	FBtr0072676	2.0873	0	0	0	0.4312	-2.40	1.5297	109	-3.80	0
FBgn0011455	FBtr0334094	2.5666	0	0	0	0.4306	-1.50	2.7889	72	-5.20	0
FBgn0011474	FBtr0082929	1.0408	4	4	4	0.4651	-2.70	-1.1217	301	-5.50	0
FBgn0011476	FBtr0334696	2.7017	3	3	3	0.3782	-1.20	1.0336	119	-6.00	0
FBgn0011481	FBtr0083611	0.9987	11	11	9	0.4131	0.00	4.0480	1501	-4.10	0
FBgn0011509	FBtr0333891	2.8482	1	1	1	0.4390	-3.60	2.8696	82	-12.50	0
FBgn0011566	FBtr0070447	0.5132	2	2	1	0.4163	-10.10	2.9202	209	-4.80	0
FBgn0011570	FBtr0077881	2.0537	0	0	0	0.3952	-0.70	4.0717	210	-8.80	0
FBgn0011571	FBtr0074217	1.6904	0	0	0	0.3404	0.00	3.1812	141	-3.60	0
FBgn0011573	FBtr0072777	1.2907	0	0	0	0.3961	0.00	4.2987	308	-6.20	0
FBgn0011576	FBtr0070387	0.0318	0	0	0	0.5625	NA	1.6633	16	NA	NA
FBgn0011584	FBtr0343741	1.5723	2	2	2	0.3917	-1.50	2.2310	120	-5.30	0
FBgn0011586	FBtr0071266	5.5563	0	0	0	0.4000	0.00	2.4716	230	-0.70	0
FBgn0011591	FBtr0078267	0.8176	0	0	0	0.4313	-7.90	-3.1309	211	-5.60	0
FBgn0011592	FBtr0087822	1.3199	9	9	8	0.4288	-3.50	0.4939	674	-5.50	0
FBgn0011603	FBtr0077447	0.5344	0	0	0	0.4845	-2.60	0.7729	161	-2.60	0
FBgn0011604	FBtr0087842	0.9735	0	0	0	0.4277	0.00	1.3750	166	-7.80	0
FBgn0011606	FBtr0340093	0.4262	1	1	1	0.4330	-5.00	1.0830	224	-4.40	0
FBgn0011638	FBtr0081374	1.1487	0	0	0	0.4091	-3.60	2.8427	88	-5.90	0
FBgn0011640	FBtr0076841	1.2829	0	0	0	0.4986	-17.00	0.2839	355	-4.30	0
FBgn0011642	FBtr0089210	4.2689	2	2	2	0.2885	-5.70	-1.3192	208	-6.50	0
FBgn0011648	FBtr0077616	1.5801	4	4	4	0.4635	-1.60	2.5518	356	-5.80	0
FBgn0011653	FBtr0073260	1.7089	1	1	1	0.3967	-4.20	-1.5663	184	-7.50	0
FBgn0011655	FBtr0085815	0.4307	4	4	4	0.5354	-13.30	-1.2817	635	-7.90	0
FBgn0011656	FBtr0330708	0.5809	4	4	3	0.4903	-7.50	-0.1360	1134	-7.10	0
FBgn0011659	FBtr0088790	0.1678	0	0	0	0.6316	NA	0.8727	19	NA	NA
FBgn0011660	FBtr0087388	1.0640	0	0	0	0.3947	-9.50	-0.0819	76	-1.80	0
FBgn0011661	FBtr0071274	1.0061	1	1	1	0.3516	-4.80	4.0480	256	-6.40	0
FBgn0011666	FBtr0084882	1.6927	1	1	1	0.3517	-2.90	0.0960	489	-2.30	0
FBgn0011672	FBtr0301478	0.7076	1	1	1	0.4638	-4.50	2.6414	373	-9.10	0
FBgn0011674	FBtr0071562	0.2391	1	1	1	0.4765	-3.60	-0.3943	361	-6.00	0
FBgn0011692	FBtr0073227	0.9760	0	0	0	0.4306	-2.70	3.1927	144	-11.50	0
FBgn0011695	FBtr0072164	1.4154	0	0	0	0.5000	-1.20	2.7397	82	-5.40	0
FBgn0011701	FBtr0083564	0.9866	1	1	1	0.3967	-5.80	0.8246	305	-8.10	0
FBgn0011703	FBtr0080059	1.0523	0	0	0	0.4154	-0.90	2.5528	65	-6.70	0
FBgn0011704	FBtr0088046	1.2483	0	0	0	0.3858	-0.10	-0.5861	127	0.00	0
FBgn0011705	FBtr0079782	1.4519	0	0	0	0.3724	0.00	1.4958	145	-6.00	0
FBgn0011706	FBtr0075120	4.9706	0	0	0	0.3900	-2.10	2.5784	200	-1.20	0
FBgn0011708	FBtr0080831	1.4619	2	2	2	0.4344	-2.50	-0.3008	221	-0.10	0
FBgn0011710	FBtr0077198	1.6490	0	0	0	0.4333	-2.10	2.8533	90	-6.40	0
FBgn0011715	FBtr0078682	1.4315	1	1	1	0.4436	-1.70	3.1752	133	-7.00	0
FBgn0011722	FBtr0343152	0.9538	0	0	0	0.4639	-7.90	0.3068	194	-12.90	0
FBgn0011723	FBtr0332070	1.9449	0	0	0	0.4286	-13.90	0.4324	336	-5.50	0
FBgn0011725	FBtr0084566	1.2732	1	1	1	0.3889	-6.70	-1.2389	198	-1.60	0
FBgn0011726	FBtr0072188	4.3432	0	0	0	0.3942	-2.70	3.5420	137	-7.20	0
FBgn0011737	FBtr0079371	1.2445	0	0	0	0.3934	-6.90	2.9489	211	-5.00	0
FBgn0011739	FBtr0085720	0.4000	17	17	12	0.4282	-8.90	0.7987	1135	-7.20	0
FBgn0011740	FBtr0334302	0.4242	0	0	0	0.4178	-2.90	1.5687	146	-3.20	0
FBgn0011741	FBtr0074203	0.3966	1	1	0	0.3908	-4.90	1.0131	87	-10.10	0
FBgn0011742	FBtr0112868	0.8729	0	0	0	0.4467	-3.50	1.1009	338	-5.10	0
FBgn0011745	FBtr0082652	0.7023	0	0	0	0.3544	-0.30	3.8539	79	-6.30	0
FBgn0011746	FBtr0088559	1.8535	2	2	2	0.3718	-4.10	4.2544	234	-2.80	0
FBgn0011747	FBtr0089173	2.8817	0	0	0	0.1538	NA	-0.2741	26	NA	NA
FBgn0011754	FBtr0301501	0.6735	1	1	1	0.4904	-11.50	-2.0511	677	-5.50	0
FBgn0011758	FBtr0074430	0.4626	0	0	0	0.3889	-3.80	-3.7133	216	-13.60	0
FBgn0011760	FBtr0070706	9.5174	0	0	0	0.4233	-0.30	3.6902	215	-4.00	0
FBgn0011761	FBtr0070749	2.5618	0	0	0	0.3774	-2.20	4.2806	106	-2.90	0
FBgn0011762	FBtr0076603	1.9865	0	0	0	0.3385	-2.70	1.5390	195	-5.10	0
FBgn0011763	FBtr0087740	1.3450	3	3	3	0.5367	-5.90	3.1714	613	-9.90	0
FBgn0011764	FBtr0339766	3.0910	0	0	0	0.4132	-7.10	-0.9025	121	-2.60	0
FBgn0011766	FBtr0084117	0.6042	3	3	2	0.4501	-8.50	2.3622	531	-4.90	0
FBgn0011768	FBtr0082290	0.6356	0	0	0	0.4340	-1.80	2.1514	106	0.00	0
FBgn0011769	FBtr0303475	1.9663	0	0	0	0.3542	-4.30	3.6728	48	-5.80	0
FBgn0011770	FBtr0071472	1.5698	0	0	0	0.4636	-9.20	0.9632	110	-2.60	0
FBgn0011771	FBtr0078510	0.9054	1	1	1	0.4952	-4.20	-0.5059	208	-1.40	0
FBgn0011774	FBtr0082385	0.9315	0	0	0	0.4396	-8.50	1.3789	91	-4.40	0
FBgn0011785	FBtr0084604	0.5025	2	2	2	0.4174	-6.30	1.6880	115	-9.00	0
FBgn0011787	FBtr0076511	2.0682	0	0	0	0.4400	-0.10	1.0777	100	-9.60	0
FBgn0011802	FBtr0076292	1.7838	0	0	0	0.3200	-5.00	2.1681	75	-1.20	0
FBgn0011817	FBtr0076758	1.1562	6	6	6	0.4668	-5.00	-1.3967	1054	-5.80	0
FBgn0011818	FBtr0077779	2.2846	0	0	0	0.4000	-5.20	2.0239	75	-4.20	0
FBgn0011824	FBtr0071639	1.4109	0	0	0	0.3378	-5.80	2.8388	74	-7.60	0
FBgn0011826	FBtr0074294	0.7118	1	1	1	0.5057	-0.10	1.6731	609	0.00	0
FBgn0011828	FBtr0072954	0.2896	0	0	0	0.5082	-4.10	1.5658	61	-14.00	0
FBgn0011829	FBtr0081494	0.4068	2	2	2	0.3929	-1.70	2.5422	336	-10.20	0
FBgn0011834	FBtr0077272	0.2537	0	0	0	0.3889	NA	3.2125	18	NA	NA
FBgn0011836	FBtr0076361	0.6916	0	0	0	0.3684	-5.30	0.0604	114	-5.00	0
FBgn0011837	FBtr0073683	2.1794	1	1	1	0.3594	-0.50	4.0480	384	-7.80	0
FBgn0012034	FBtr0333126	0.9617	2	1	1	0.3776	0.00	3.6466	196	-3.80	0
FBgn0012036	FBtr0332597	0.8781	0	0	0	0.4163	-2.60	3.2994	209	-8.00	0
FBgn0012037	FBtr0080552	0.7126	0	0	0	0.5158	-6.90	3.6241	95	-6.70	0
FBgn0012051	FBtr0112869	0.9015	0	0	0	0.4453	-5.00	1.8142	137	-5.40	0
FBgn0012058	FBtr0333369	0.6067	6	6	6	0.4689	-2.30	1.0921	659	-12.60	0
FBgn0013263	FBtr0075708	1.0638	0	0	0	0.4831	-4.00	-4.3627	356	-6.30	0
FBgn0013269	FBtr0083120	1.5391	0	0	0	0.4000	-2.70	2.1802	105	-3.90	0
FBgn0013272	FBtr0071813	0.9359	0	0	0	0.4405	-5.50	2.5493	168	-7.50	0
FBgn0013303	FBtr0074902	3.6671	4	4	4	0.3607	-1.60	2.9489	244	-1.20	0
FBgn0013305	FBtr0089876	2.5188	0	0	0	0.3023	0.00	1.9659	129	-4.50	0
FBgn0013325	FBtr0086533	0.3655	0	0	0	0.4545	-6.00	3.7057	77	-2.70	0
FBgn0013334	FBtr0083204	1.5020	3	3	3	0.4767	-1.90	2.9878	1007	-10.00	1
FBgn0013342	FBtr0072815	1.0429	0	0	0	0.5458	0.00	0.9186	480	-6.90	0
FBgn0013343	FBtr0084588	1.6091	5	3	3	0.4288	-0.70	2.7615	1320	-5.40	0
FBgn0013347	FBtr0084526	3.6541	0	0	0	0.4095	-6.00	0.8262	105	-4.00	0
FBgn0013432	FBtr0070431	3.2210	0	0	0	0.4880	-3.60	0.8540	166	-8.80	0
FBgn0013433	FBtr0080806	1.6761	3	3	2	0.4395	0.00	2.6370	769	-6.20	0
FBgn0013435	FBtr0088429	1.3790	1	1	1	0.2353	-1.40	0.0580	68	-3.40	0
FBgn0013467	FBtr0087361	2.1134	0	0	0	0.4574	-2.90	2.0370	481	-11.10	0
FBgn0013469	FBtr0345346	0.3252	3	3	3	0.4562	-5.20	-2.0590	1061	-12.40	0
FBgn0013531	FBtr0079544	2.5924	0	0	0	0.3448	-0.50	0.9697	87	-5.00	0
FBgn0013548	FBtr0072085	0.6294	1	1	1	0.4620	-4.70	2.6483	158	-3.70	0
FBgn0013563	FBtr0075777	0.5703	1	1	1	0.4342	-5.80	0.5976	76	-2.00	0
FBgn0013576	FBtr0333695	0.6836	0	0	0	0.4798	-9.70	0.5429	173	-7.50	0
FBgn0013672	FBtr0100867	0.1101	0	0	0	NA	NA	NA		NA	NA
FBgn0013673	FBtr0100866	0.0000	0	0	0	NA	NA	NA		NA	NA
FBgn0013674	FBtr0100861	0.0356	0	0	0	NA	NA	NA		NA	NA
FBgn0013675	FBtr0100863	0.0587	0	0	0	NA	NA	NA		NA	NA
FBgn0013676	FBtr0100868	0.0460	0	0	0	NA	NA	NA		NA	NA
FBgn0013678	FBtr0100884	0.0437	0	0	0	NA	NA	NA		NA	NA
FBgn0013679	FBtr0100886	0.0215	0	0	0	NA	NA	NA		NA	NA
FBgn0013680	FBtr0100857	0.0759	0	0	0	NA	NA	NA		NA	NA
FBgn0013681	FBtr0100870	0.0667	0	0	0	NA	NA	NA		NA	NA
FBgn0013683	FBtr0100880	0.0018	0	0	0	NA	NA	NA		NA	NA
FBgn0013684	FBtr0100877	0.0476	0	0	0	NA	NA	NA		NA	NA
FBgn0013685	FBtr0100883	0.2087	0	0	0	NA	NA	NA		NA	NA
FBgn0013717	FBtr0290259	0.6405	4	4	4	0.5408	-12.20	-0.2291	638	-11.90	0
FBgn0013718	FBtr0100040	1.9783	4	4	4	0.3922	-3.80	2.8000	742	-8.80	0
FBgn0013720	FBtr0070256	1.1529	0	0	0	0.5182	-8.30	0.5829	137	-5.20	0
FBgn0013725	FBtr0087516	0.6530	0	0	0	0.5369	-11.90	0.4725	244	-9.20	0
FBgn0013726	FBtr0088793	1.1300	1	1	1	0.4755	-6.20	-1.4163	204	-6.40	0
FBgn0013732	FBtr0336663	1.3617	1	1	1	0.4785	-0.30	2.7141	186	-3.80	0
FBgn0013733	FBtr0304851	0.1446	0	0	0	0.4481	-2.00	0.8433	241	-11.50	0
FBgn0013746	FBtr0343095	2.6606	0	0	0	0.3276	-1.70	1.5833	116	-6.40	0
FBgn0013749	FBtr0089192	8.2468	0	0	0	0.2857	-2.10	3.1812	98	-1.90	0
FBgn0013750	FBtr0087378	1.7201	5	2	2	0.4855	-4.90	2.6724	276	-6.80	0
FBgn0013751	FBtr0330071	0.5592	5	5	4	0.4496	-5.10	2.9210	536	-5.90	0
FBgn0013753	FBtr0072758	1.9607	0	0	0	0.4577	-6.00	2.5395	284	-5.30	0
FBgn0013755	FBtr0072760	6.0884	0	0	0	0.3056	NA	0.8433	36	NA	NA
FBgn0013756	FBtr0088033	0.9584	0	0	0	0.3741	-5.40	2.1258	139	-5.00	0
FBgn0013759	FBtr0084161	0.2974	3	3	3	0.4333	-3.60	3.9293	510	-2.70	0
FBgn0013762	FBtr0087350	1.6416	0	0	0	0.4261	0.00	3.3394	115	-10.40	0
FBgn0013763	FBtr0087111	1.3328	0	0	0	0.4783	-3.60	2.3644	69	-5.40	0
FBgn0013764	FBtr0072191	0.8662	4	4	4	0.4038	-3.30	-0.2100	156	-6.40	0
FBgn0013765	FBtr0087703	1.0767	0	0	0	0.3846	-2.50	-2.5674	117	-6.70	0
FBgn0013767	FBtr0082927	2.1018	0	0	0	0.5000	-10.00	1.9111	82	-5.00	0
FBgn0013770	FBtr0087593	2.8939	0	0	0	0.5385	NA	-0.6075	13	NA	NA
FBgn0013773	FBtr0087450	0.6684	1	1	1	0.4783	-4.40	-1.3726	115	-8.60	0
FBgn0013799	FBtr0074882	0.8623	6	6	4	0.4127	-1.90	0.3366	361	-5.40	0
FBgn0013949	FBtr0334571	0.6591	0	0	0	0.5000	NA	0.6616	20	NA	NA
FBgn0013953	FBtr0084703	0.6898	0	0	0	0.4890	-3.90	2.0094	227	-10.90	0
FBgn0013954	FBtr0086515	3.3134	0	0	0	0.4375	-2.60	3.2773	80	-5.30	0
FBgn0013981	FBtr0334029	2.6865	0	0	0	0.3654	-2.30	1.8185	52	-4.30	0
FBgn0013983	FBtr0086725	1.4424	0	0	0	0.4590	-3.10	0.9843	122	-1.60	0
FBgn0013984	FBtr0290230	2.7130	12	12	12	0.4249	-1.90	1.0487	1118	-12.00	0
FBgn0013987	FBtr0308577	1.4400	0	0	0	0.4400	NA	1.2191	25	NA	NA
FBgn0013995	FBtr0309202	0.2372	0	0	0	0.4773	-3.80	-0.4618	616	-10.00	0
FBgn0013997	FBtr0075999	0.9247	1	1	1	0.4256	-1.50	2.7397	336	-11.20	0
FBgn0014000	FBtr0081306	1.1892	0	0	0	0.5161	NA	0.1223	31	NA	NA
FBgn0014002	FBtr0075648	1.8736	0	0	0	0.4676	-1.10	1.2456	139	-7.50	0
FBgn0014006	FBtr0300256	0.2787	3	3	1	0.4585	-5.90	0.7884	205	-0.70	0
FBgn0014007	FBtr0075913	2.9743	1	1	1	0.3750	-3.80	0.4738	208	-4.50	0
FBgn0014009	FBtr0336658	2.9810	0	0	0	0.4345	-3.00	2.5734	145	-13.30	0
FBgn0014010	FBtr0077797	2.8947	0	0	0	0.4591	-2.60	-0.0831	257	-8.40	0
FBgn0014011	FBtr0332800	1.4029	3	3	2	0.4044	-3.60	0.7587	680	-7.50	0
FBgn0014018	FBtr0089341	0.6849	1	1	1	0.4554	-11.20	2.6569	101	-9.00	0
FBgn0014020	FBtr0087211	3.3195	1	1	1	0.3801	-3.70	-2.1683	271	-12.90	0
FBgn0014022	FBtr0082062	2.3826	0	0	0	0.3889	NA	1.8495	36	NA	NA
FBgn0014023	FBtr0082121	1.9560	0	0	0	0.3571	-6.70	3.2912	42	-6.70	0
FBgn0014024	FBtr0340477	0.3797	0	0	0	0.3902	-9.40	0.7699	82	-8.30	0
FBgn0014026	FBtr0343329	0.2083	0	0	0	0.4118	-4.10	2.8388	85	-7.30	0
FBgn0014028	FBtr0086156	0.9648	0	0	0	0.4264	-6.10	2.6517	129	-7.80	0
FBgn0014029	FBtr0083945	1.4198	0	0	0	0.4706	-1.30	1.9237	85	-6.60	0
FBgn0014031	FBtr0070913	0.9285	0	0	0	0.4821	-3.20	1.5597	168	-9.50	0
FBgn0014032	FBtr0071241	3.3652	0	0	0	0.4470	-4.20	1.3322	132	-8.30	0
FBgn0014033	FBtr0346582	0.8061	0	0	0	0.4138	-3.20	0.4689	58	-2.60	0
FBgn0014037	FBtr0074920	0.7025	3	3	3	0.4371	-7.10	-1.6325	993	-10.20	0
FBgn0014075	FBtr0075064	0.9143	1	1	1	0.4089	-6.50	1.6649	203	-5.50	0
FBgn0014076	FBtr0343618	0.0000	0	0	0	0.3226	NA	0.7587	31	NA	NA
FBgn0014092	FBtr0080834	3.4318	0	0	0	0.4091	-3.10	-0.9134	88	-6.40	0
FBgn0014127	FBtr0081348	1.0730	0	0	0	0.3333	-2.50	2.3407	150	-6.10	0
FBgn0014133	FBtr0073526	0.9140	3	3	3	0.4863	-4.10	0.6588	329	-4.70	0
FBgn0014135	FBtr0083795	0.2556	12	12	11	0.4063	-5.40	-4.7797	1110	-8.80	0
FBgn0014141	FBtr0089473	1.1151	1	1	1	0.4256	-6.20	1.2608	195	-6.40	0
FBgn0014143	FBtr0078395	1.5045	2	2	2	0.4035	-8.80	0.2839	285	-6.10	0
FBgn0014163	FBtr0100477	1.0155	1	1	0	0.4563	0.00	3.2773	366	-5.20	0
FBgn0014179	FBtr0079855	1.2231	1	1	0	0.4379	-2.30	3.8573	153	-7.40	0
FBgn0014184	FBtr0088013	1.0409	0	0	0	0.3716	-3.20	1.8950	148	-1.30	0
FBgn0014189	FBtr0079125	1.5571	0	0	0	0.3896	-2.30	2.4943	77	-4.10	0
FBgn0014269	FBtr0086601	1.4336	0	0	0	0.4960	-4.30	-2.3307	125	-7.60	0
FBgn0014340	FBtr0070829	1.8375	0	0	0	0.3762	-5.60	0.9164	101	-4.10	0
FBgn0014342	FBtr0089313	1.0699	0	0	0	0.4167	NA	3.6902	12	NA	NA
FBgn0014343	FBtr0075912	0.6774	0	0	0	0.4562	-5.20	-1.1716	673	-4.30	0
FBgn0014366	FBtr0078751	1.1147	1	1	1	0.3937	-2.20	0.9186	127	-6.60	0
FBgn0014380	FBtr0082124	1.3474	0	0	0	0.4756	-5.00	-1.3045	246	-8.40	0
FBgn0014388	FBtr0073146	0.3524	7	7	7	0.3966	-10.20	-0.4941	1354	-9.90	0
FBgn0014391	FBtr0074176	3.7149	0	0	0	0.3511	-2.90	3.4024	94	-4.10	0
FBgn0014395	FBtr0077345	0.4997	2	2	2	0.4030	-7.80	-0.0770	134	-2.20	0
FBgn0014411	FBtr0070311	1.4778	0	0	0	0.4702	-4.80	-0.2504	285	-8.70	0
FBgn0014417	FBtr0331991	1.5100	0	0	0	0.5312	-1.40	1.2041	64	-10.10	0
FBgn0014427	FBtr0085390	0.5389	0	0	0	0.4627	-2.00	1.8993	67	-4.50	0
FBgn0014455	FBtr0074030	0.4020	0	0	0	0.4923	-0.90	1.2608	130	-8.20	0
FBgn0014469	FBtr0088745	0.5586	0	0	0	0.5333	-14.00	2.2547	60	-7.80	0
FBgn0014857	FBtr0333536	3.2038	0	0	0	0.4320	-1.10	1.7462	125	-5.80	0
FBgn0014861	FBtr0081827	0.8447	0	0	0	0.4809	0.00	0.6369	131	-6.10	0
FBgn0014863	FBtr0081617	0.9694	0	0	0	0.3750	-0.80	1.2109	144	-5.50	0
FBgn0014868	FBtr0071344	1.2491	0	0	0	0.3690	-6.50	2.4896	84	-2.80	0
FBgn0014869	FBtr0100482	2.4361	0	0	0	0.4773	-2.00	2.8427	88	-9.50	0
FBgn0014870	FBtr0087072	1.2344	3	3	3	0.3502	0.00	0.7301	317	-2.70	0
FBgn0014877	FBtr0087675	2.2793	0	0	0	0.3750	-1.60	1.9024	104	-3.70	0
FBgn0014879	FBtr0083062	1.7687	0	0	0	0.4593	-6.30	1.2896	135	-2.50	0
FBgn0014903	FBtr0070175	0.0458	0	0	0	0.5714	NA	-1.9199	28	NA	NA
FBgn0014906	FBtr0077576	1.1684	1	1	0	0.4982	-3.60	2.0639	275	-7.50	0
FBgn0014930	FBtr0339712	0.8124	6	6	6	0.4729	-6.80	0.1438	277	-5.00	0
FBgn0014931	FBtr0081757	1.4014	3	3	3	0.3176	-0.90	-1.8881	233	-2.70	0
FBgn0014949	FBtr0084278	2.3965	0	0	0	NA	NA	NA		NA	NA
FBgn0015000	FBtr0078991	0.6644	1	1	1	0.4000	-1.60	0.9122	105	-5.60	0
FBgn0015011	FBtr0083379	0.4870	1	1	1	0.4740	-5.00	2.1547	346	-14.10	0
FBgn0015019	FBtr0083337	0.6388	0	0	0	0.4052	-2.60	2.2020	153	-4.50	0
FBgn0015024	FBtr0345162	2.0138	0	0	0	0.4577	-9.20	1.0304	201	-3.30	0
FBgn0015025	FBtr0075504	2.5450	0	0	0	0.3333	-4.00	3.9693	69	-2.70	0
FBgn0015031	FBtr0307035	3.2872	0	0	0	0.3125	-3.50	2.5749	64	-1.90	0
FBgn0015039	FBtr0089055	0.9938	0	0	0	0.4800	-3.20	2.1238	50	-5.60	0
FBgn0015040	FBtr0072321	0.8103	0	0	0	0.5691	0.00	-0.0417	123	-7.60	0
FBgn0015075	FBtr0078492	0.6698	0	0	0	0.3860	-7.00	3.5743	114	-4.10	0
FBgn0015218	FBtr0076491	1.0708	0	0	0	0.4785	-2.00	2.5864	326	-4.10	0
FBgn0015221	FBtr0332168	2.6053	0	0	0	0.3765	-1.40	1.8640	85	-4.60	0
FBgn0015222	FBtr0085632	2.5247	0	0	0	0.4434	-2.90	2.6938	106	-3.10	0
FBgn0015229	FBtr0084157	0.9773	2	2	2	0.4150	-1.30	0.7178	347	-6.40	0
FBgn0015239	FBtr0303654	0.3117	1	1	0	0.3902	-10.70	1.9042	82	-2.50	0
FBgn0015240	FBtr0084756	0.4118	2	2	1	0.5372	-3.40	2.3378	309	-4.20	0
FBgn0015245	FBtr0073434	0.9155	0	0	0	0.4342	-2.90	2.7768	152	-7.10	0
FBgn0015247	FBtr0087296	0.6103	0	0	0	0.3946	-11.00	1.8312	147	-3.10	0
FBgn0015268	FBtr0072219	0.2859	0	0	0	0.4679	-4.70	2.6024	109	-5.80	0
FBgn0015269	FBtr0100113	0.9955	1	1	1	0.4014	-0.50	3.1130	279	-2.60	0
FBgn0015270	FBtr0082866	1.0449	0	0	0	0.4615	-13.40	0.0500	65	-4.30	0
FBgn0015271	FBtr0080543	1.1553	0	0	0	0.3700	-9.40	0.0119	200	-5.20	0
FBgn0015277	FBtr0072064	0.3851	0	0	0	0.4444	-2.60	2.8787	81	-15.30	0
FBgn0015278	FBtr0301816	0.8858	0	0	0	0.4904	-3.00	0.1009	157	-2.70	0
FBgn0015279	FBtr0083940	0.3403	3	3	3	0.4312	-1.70	0.0319	378	-8.10	0
FBgn0015282	FBtr0084520	1.4677	1	1	1	0.4167	-2.20	4.2244	108	-2.90	0
FBgn0015283	FBtr0333453	1.2057	0	0	0	0.4043	-2.50	3.2097	47	-3.30	0
FBgn0015286	FBtr0070584	2.9277	0	0	0	0.4467	-3.80	1.3780	300	-0.80	0
FBgn0015288	FBtr0070148	0.2592	0	0	0	0.4286	NA	3.0609	35	NA	NA
FBgn0015295	FBtr0087244	0.5350	1	1	1	0.4386	-3.40	3.1729	57	0.00	0
FBgn0015296	FBtr0076458	0.7106	0	0	0	0.5113	-5.00	-0.4997	133	-3.10	0
FBgn0015298	FBtr0076879	2.9433	0	0	0	0.3805	-4.50	1.7950	113	-10.80	0
FBgn0015299	FBtr0079590	3.4445	0	0	0	0.3434	-3.60	3.3212	99	-6.60	0
FBgn0015316	FBtr0345312	0.2709	0	0	0	0.3784	-6.10	-3.8787	74	-5.80	0
FBgn0015320	FBtr0080115	3.2948	0	0	0	0.5099	-2.10	2.9444	304	-3.50	0
FBgn0015321	FBtr0076395	2.5946	0	0	0	0.4678	-3.80	2.0652	357	-4.80	0
FBgn0015324	FBtr0078700	3.2841	0	0	0	0.3862	-1.90	4.2743	145	-5.70	0
FBgn0015331	FBtr0078967	1.0404	1	1	1	0.3659	0.00	-1.0420	82	-7.70	0
FBgn0015338	FBtr0080850	1.3090	1	1	1	0.2993	0.00	2.8566	284	-4.30	0
FBgn0015351	FBtr0336486	0.9546	0	0	0	0.2812	NA	0.8761	32	NA	NA
FBgn0015359	FBtr0072877	1.2836	1	1	1	0.4054	-0.50	3.6466	111	-7.60	0
FBgn0015360	FBtr0072904	0.3891	3	3	3	0.5444	-7.00	0.5236	259	-8.20	0
FBgn0015371	FBtr0087415	0.9614	1	1	1	0.4524	-7.40	0.1697	473	-3.20	0
FBgn0015372	FBtr0072120	0.9505	1	1	1	0.4665	-8.90	0.4158	343	-1.70	0
FBgn0015376	FBtr0077541	0.6136	1	1	1	0.3615	-1.60	0.6355	130	-10.20	0
FBgn0015379	FBtr0077193	2.5900	0	0	0	0.3763	-1.20	0.8901	93	-6.80	0
FBgn0015380	FBtr0081195	0.6144	3	3	2	0.4651	-6.20	2.0079	387	-5.10	0
FBgn0015391	FBtr0080935	0.9220	0	0	0	0.4414	-2.80	0.4998	111	-5.30	0
FBgn0015393	FBtr0079846	1.1553	0	0	0	0.3774	-2.20	1.9787	106	-5.40	0
FBgn0015396	FBtr0082237	1.6999	2	2	2	0.4422	0.00	2.9985	346	-6.50	0
FBgn0015402	FBtr0078766	0.6930	2	2	2	0.5539	-4.50	0.7516	269	-9.20	0
FBgn0015477	FBtr0088618	0.7960	2	2	2	0.3526	-2.50	0.8024	173	-3.90	0
FBgn0015509	FBtr0088848	1.6713	1	1	1	0.5164	-7.00	1.8645	366	-2.60	0
FBgn0015513	FBtr0084459	0.9887	6	6	6	0.4470	-3.00	2.7658	575	-4.50	0
FBgn0015520	FBtr0083335	2.0346	0	0	0	0.3577	-4.50	-0.1515	123	-5.70	0
FBgn0015521	FBtr0273293	0.4483	0	0	0	0.4783	-3.30	3.2006	115	-10.30	0
FBgn0015522	FBtr0086799	0.8926	3	3	2	0.4052	-0.30	1.2040	733	-6.80	0
FBgn0015524	FBtr0342796	0.6298	1	1	0	0.5000	-0.90	0.8901	664	-7.40	1
FBgn0015527	FBtr0077223	1.0878	0	0	0	0.4239	-8.50	2.7094	92	-7.20	0
FBgn0015541	FBtr0085066	0.5753	1	1	1	0.4821	-8.70	2.2909	811	-6.70	0
FBgn0015544	FBtr0072256	2.1670	0	0	0	0.4138	-3.30	2.3864	87	-12.60	0
FBgn0015546	FBtr0080630	1.1749	1	1	1	0.3333	-1.40	2.5826	69	-11.80	0
FBgn0015550	FBtr0075216	0.2979	0	0	0	0.4595	-1.80	0.2637	111	-8.80	0
FBgn0015553	FBtr0081131	1.0092	2	2	2	0.3419	-0.10	1.9022	117	-5.20	0
FBgn0015558	FBtr0333749	0.2927	0	0	0	0.4979	-9.30	1.0304	235	-4.10	0
FBgn0015561	FBtr0088586	0.3576	0	0	0	0.4884	-8.20	1.9772	129	-6.70	0
FBgn0015568	FBtr0081544	0.4430	1	1	0	0.5269	-5.70	-0.1037	186	-12.40	0
FBgn0015570	FBtr0081540	1.1627	0	0	0	0.4095	-0.40	0.9379	105	-7.10	0
FBgn0015571	FBtr0339708	0.4553	0	0	0	0.4783	NA	2.5073	23	NA	NA
FBgn0015582	FBtr0088176	0.2656	0	0	0	0.4204	-12.00	2.1451	157	-4.70	0
FBgn0015589	FBtr0085351	0.6381	2	2	2	0.5178	-4.00	-1.1289	253	-10.80	0
FBgn0015600	FBtr0112883	0.9220	0	0	0	0.4444	-4.40	3.6665	63	-2.60	0
FBgn0015602	FBtr0087442	2.0784	0	0	0	0.3168	-2.10	2.9242	101	-0.80	0
FBgn0015609	FBtr0100315	1.3978	6	6	6	0.3615	-4.70	3.9172	603	-12.70	0
FBgn0015614	FBtr0088930	2.1014	2	1	1	0.4453	-1.20	4.6296	256	-7.90	0
FBgn0015615	FBtr0074290	0.5117	1	1	1	0.2740	-9.60	1.0777	73	-3.20	0
FBgn0015618	FBtr0076369	1.4912	0	0	0	0.3692	-6.50	3.8990	65	-8.50	0
FBgn0015621	FBtr0078011	1.2988	0	0	0	0.4435	-2.10	1.3153	115	-0.70	0
FBgn0015622	FBtr0085438	0.7462	1	1	1	0.4777	-8.80	2.8543	224	-0.90	0
FBgn0015623	FBtr0079250	0.9606	0	0	0	0.5098	-4.20	3.0033	306	-7.90	0
FBgn0015625	FBtr0084728	1.4642	1	1	1	0.5000	-8.00	4.2587	288	-4.30	0
FBgn0015664	FBtr0310483	1.3730	1	1	1	0.3837	0.00	2.7315	344	-4.00	0
FBgn0015721	FBtr0089600	1.1258	2	2	2	0.4367	-4.60	3.3149	648	-7.20	0
FBgn0015737	FBtr0085164	0.7752	0	0	0	0.4472	-5.10	1.3166	161	-7.80	0
FBgn0015754	FBtr0304747	1.3726	0	0	0	0.4677	-2.80	0.2824	124	-5.20	0
FBgn0015756	FBtr0340226	0.4443	0	0	0	0.4824	-4.40	2.5330	85	-5.50	0
FBgn0015765	FBtr0084580	0.8703	1	1	1	0.4601	-3.80	1.0163	163	-3.60	0
FBgn0015766	FBtr0077132	0.7713	0	0	0	0.4175	-1.00	-1.6101	206	-10.10	0
FBgn0015772	FBtr0081187	0.8004	1	1	1	0.5015	-6.40	2.1678	329	-4.40	0
FBgn0015773	FBtr0308337	0.9221	0	0	0	0.3695	-5.40	2.8411	590	-9.30	0
FBgn0015774	FBtr0302018	1.5363	1	1	1	0.4813	-5.00	-1.5328	320	-7.70	0
FBgn0015776	FBtr0332370	1.8155	1	1	1	0.4474	-4.20	1.3877	447	-10.90	0
FBgn0015777	FBtr0079382	1.4861	0	0	0	0.4507	-3.70	2.6632	142	-3.60	0
FBgn0015778	FBtr0346347	0.7041	1	1	1	0.4397	-2.30	-0.7402	348	-2.50	0
FBgn0015781	FBtr0083713	1.3172	0	0	0	0.4202	-2.80	1.1270	238	-2.90	0
FBgn0015789	FBtr0077337	4.2887	0	0	0	0.4505	-7.40	1.4602	293	-0.40	0
FBgn0015790	FBtr0084011	2.6208	0	0	0	0.4409	-3.00	4.2987	220	-8.20	0
FBgn0015791	FBtr0080626	2.4808	0	0	0	0.4807	-3.90	2.8458	337	-1.50	0
FBgn0015793	FBtr0076705	0.9504	0	0	0	0.4505	-8.00	1.9857	91	-4.10	0
FBgn0015794	FBtr0070849	0.8290	0	0	0	0.3709	-2.60	2.9299	151	-4.30	0
FBgn0015795	FBtr0308612	2.2721	2	2	2	0.4610	-1.60	2.7193	154	-4.70	0
FBgn0015797	FBtr0080361	1.0163	0	0	0	0.4953	-2.20	1.1573	317	-1.70	0
FBgn0015799	FBtr0070146	0.3689	4	4	4	0.5317	-3.10	1.4626	694	-5.60	0
FBgn0015801	FBtr0072427	1.4012	1	1	1	0.5059	-6.90	2.2687	506	-6.80	0
FBgn0015803	FBtr0081356	1.2304	4	4	4	0.4173	-5.60	0.6192	508	-11.60	0
FBgn0015805	FBtr0073317	1.2458	0	0	0	0.4903	-4.30	2.5873	206	-8.00	0
FBgn0015806	FBtr0077114	1.4505	1	1	1	0.5217	-0.40	1.5513	531	-7.20	0
FBgn0015808	FBtr0081109	0.6404	0	0	0	0.3982	-4.40	3.3437	113	-0.10	0
FBgn0015818	FBtr0070894	1.5044	1	1	1	0.3483	-4.90	2.8540	89	-9.70	0
FBgn0015828	FBtr0076108	0.3648	2	2	2	0.4796	-6.50	2.3720	196	-8.90	0
FBgn0015829	FBtr0073234	3.3430	0	0	0	0.3482	-3.60	2.8802	112	-11.10	0
FBgn0015831	FBtr0307276	3.4653	1	1	1	0.3182	-3.50	1.5798	110	-1.50	0
FBgn0015834	FBtr0079053	0.8729	1	1	1	0.3659	-0.30	3.2495	82	-6.30	0
FBgn0015838	FBtr0088566	0.5204	6	6	5	0.5000	-14.70	0.9479	338	-15.40	0
FBgn0015872	FBtr0088142	2.3699	0	0	0	0.4783	0.00	4.2987	276	-7.60	0
FBgn0015903	FBtr0072070	1.9859	3	3	3	0.4202	-2.20	4.6558	376	-7.70	0
FBgn0015904	FBtr0300551	0.8404	2	2	2	0.4524	-6.60	2.9202	431	-5.60	0
FBgn0015905	FBtr0077952	0.4738	0	0	0	0.3793	-4.00	2.4972	87	-5.50	0
FBgn0015919	FBtr0075909	0.3154	5	5	5	0.4692	-10.40	1.8805	1138	-8.80	0
FBgn0015924	FBtr0331232	0.5761	4	4	4	0.4231	-2.50	2.0483	260	-7.00	0
FBgn0015925	FBtr0089872	1.3148	0	0	0	0.5158	-2.40	2.0335	95	-4.10	0
FBgn0015926	FBtr0074007	1.8423	0	0	0	0.3922	-1.70	3.2651	102	-5.00	0
FBgn0015929	FBtr0088982	0.5939	0	0	0	0.4369	-4.90	1.2495	103	-3.10	0
FBgn0015946	FBtr0075130	4.2574	2	2	2	0.3428	-1.40	1.6248	318	-5.70	0
FBgn0015949	FBtr0111010	3.2936	7	7	7	0.4499	-2.40	2.9641	749	-4.10	0
FBgn0016013	FBtr0073278	2.2943	0	0	0	0.4737	-5.40	2.2954	114	-3.90	0
FBgn0016031	FBtr0077161	0.1616	1	1	0	0.4557	-3.90	2.4353	621	-5.30	0
FBgn0016032	FBtr0089033	1.5373	0	0	0	0.4270	-3.90	3.2006	185	-8.30	0
FBgn0016034	FBtr0089632	3.4043	0	0	0	0.4505	-0.80	2.7355	333	-2.40	0
FBgn0016038	FBtr0089723	2.0323	0	0	0	0.3294	-2.50	1.7809	85	0.00	0
FBgn0016041	FBtr0071073	1.4590	0	0	0	0.4037	-2.90	2.8802	109	-9.80	0
FBgn0016047	FBtr0339483	0.7156	0	0	0	0.4327	-3.90	0.7680	245	-4.30	0
FBgn0016053	FBtr0112519	0.3663	0	0	0	0.3478	-4.90	1.8997	69	-7.30	0
FBgn0016054	FBtr0336830	0.7570	0	0	0	0.4722	-13.00	4.2481	72	-6.90	0
FBgn0016059	FBtr0086890	1.5784	6	6	6	0.4577	-4.20	1.9151	485	-4.80	0
FBgn0016061	FBtr0309179	0.4561	8	8	5	0.4631	-5.30	0.2902	1015	-8.30	1
FBgn0016070	FBtr0076549	1.4122	5	5	5	0.3988	0.00	1.7345	509	-4.80	0
FBgn0016075	FBtr0079036	0.5497	1	1	1	0.5000	-5.70	-0.9475	186	-5.30	0
FBgn0016076	FBtr0300020	1.1598	0	0	0	0.4480	-2.40	0.2696	375	-10.40	0
FBgn0016078	FBtr0088553	1.4862	0	0	0	0.4932	-2.10	3.0295	219	-7.70	0
FBgn0016080	FBtr0074405	0.1743	0	0	0	0.3214	-4.70	1.4499	112	-2.50	0
FBgn0016081	FBtr0076417	0.7522	1	1	1	0.3574	-2.30	0.9479	277	-1.70	0
FBgn0016119	FBtr0084432	1.8216	0	0	0	0.3929	-5.40	1.0777	84	-3.40	0
FBgn0016120	FBtr0346155	2.5062	0	0	0	0.3563	-2.20	1.8475	87	-3.60	0
FBgn0016122	FBtr0079685	1.0665	0	0	0	0.4841	-10.70	0.9603	345	-9.30	0
FBgn0016126	FBtr0089067	1.0681	4	4	3	0.3626	0.00	1.5456	273	-4.00	0
FBgn0016131	FBtr0087103	1.0707	2	2	2	0.4124	-5.10	0.0951	434	-13.00	0
FBgn0016641	FBtr0071686	0.3380	3	3	3	0.5024	-7.80	-0.0444	209	-4.80	0
FBgn0016672	FBtr0082865	0.0717	2	2	2	0.4211	-7.10	1.0589	133	-2.40	0
FBgn0016684	FBtr0329884	0.4517	1	1	0	0.4951	-2.60	2.6324	103	-8.80	0
FBgn0016685	FBtr0334701	2.8598	0	0	0	0.3735	-4.20	0.8459	83	-3.50	0
FBgn0016687	FBtr0273253	2.0628	0	0	0	0.5036	-0.50	1.3118	137	-3.50	0
FBgn0016691	FBtr0083063	2.6642	0	0	0	0.4286	-7.90	2.1432	70	-3.50	0
FBgn0016693	FBtr0082655	0.8568	0	0	0	0.5179	-4.50	1.2628	280	-4.70	0
FBgn0016694	FBtr0076776	1.1320	8	7	7	0.3433	-2.40	3.5198	2263	-3.90	0
FBgn0016696	FBtr0078247	0.5461	1	1	1	0.4669	-10.50	2.4576	272	-1.10	0
FBgn0016697	FBtr0086910	2.9986	0	0	0	0.4096	-2.50	1.6933	83	-3.10	0
FBgn0016698	FBtr0077589	1.5536	1	1	1	0.3299	-4.10	1.3859	97	-0.60	0
FBgn0016700	FBtr0084104	4.0986	1	1	0	0.4120	-5.80	1.8760	267	-1.40	0
FBgn0016701	FBtr0086829	1.5894	0	0	0	0.4130	0.00	2.7488	138	-11.50	0
FBgn0016715	FBtr0072561	0.7980	0	0	0	0.4928	-8.30	2.9578	69	-8.30	0
FBgn0016726	FBtr0071592	1.7749	0	0	0	0.4340	-5.20	1.6898	53	-4.70	0
FBgn0016754	FBtr0335206	0.8199	6	5	5	0.3798	-9.10	1.6509	387	0.00	0
FBgn0016756	FBtr0077095	0.7788	1	1	1	0.5298	-4.10	0.0735	302	-6.70	0
FBgn0016762	FBtr0072083	0.8819	0	0	0	0.5217	-13.80	-0.5882	115	-3.70	0
FBgn0016794	FBtr0072926	0.9004	0	0	0	0.4932	-3.90	2.3923	73	-10.20	0
FBgn0016797	FBtr0112890	0.7052	10	10	8	0.4466	-3.80	3.5245	1059	-7.30	0
FBgn0016917	FBtr0334581	1.5515	1	1	1	0.5041	-10.10	-2.0503	484	-8.60	0
FBgn0016926	FBtr0077988	1.9359	3	3	3	0.4141	-8.10	1.7502	483	-5.60	0
FBgn0016930	FBtr0089288	1.6488	6	6	6	0.4048	-3.00	2.7425	756	-13.60	0
FBgn0016970	FBtr0088505	1.0813	0	0	0	0.2222	NA	4.6059	9	NA	NA
FBgn0016977	FBtr0078121	1.0232	14	14	14	0.3906	-4.50	-3.5416	1019	-2.40	0
FBgn0016978	FBtr0079355	0.8136	1	1	1	0.4235	-0.30	3.5245	196	-9.00	0
FBgn0016983	FBtr0301611	1.4408	1	1	1	0.4434	-2.50	0.9312	106	-12.90	0
FBgn0016984	FBtr0071563	0.6374	4	4	4	0.4666	-16.70	1.5002	658	-6.90	0
FBgn0017414	FBtr0331937	1.5641	1	1	1	0.4315	-2.30	1.3551	146	-3.90	0
FBgn0017418	FBtr0089507	1.4506	2	2	2	0.4489	-3.70	3.1714	479	-16.30	0
FBgn0017429	FBtr0076649	0.8074	0	0	0	0.4408	-8.10	0.2147	152	-2.00	0
FBgn0017430	FBtr0076650	3.4488	0	0	0	0.3162	-6.00	3.1752	136	-3.00	0
FBgn0017448	FBtr0303376	0.2338	0	0	0	0.5352	-2.20	1.1244	71	-3.60	0
FBgn0017457	FBtr0078133	1.9322	0	0	0	0.4569	-4.50	1.4916	197	-5.90	0
FBgn0017482	FBtr0071848	0.8201	0	0	0	0.3214	NA	1.5968	28	NA	NA
FBgn0017545	FBtr0089175	1.3465	0	0	0	0.4074	NA	2.1364	27	NA	NA
FBgn0017550	FBtr0078741	0.8286	6	6	4	0.4904	-3.50	-0.9895	1046	-5.40	0
FBgn0017551	FBtr0079342	0.6185	1	1	1	0.3925	-3.40	2.7813	107	-5.70	0
FBgn0017558	FBtr0306807	1.7315	2	2	2	0.4821	0.00	2.5864	811	-9.10	0
FBgn0017566	FBtr0071180	0.5259	0	0	0	0.3750	-3.70	1.5798	96	-6.00	0
FBgn0017567	FBtr0083191	2.5058	0	0	0	0.3409	-0.80	3.3149	88	-5.70	0
FBgn0017572	FBtr0331560	2.1834	0	0	0	0.4521	-2.10	1.9608	303	-2.40	0
FBgn0017577	FBtr0082279	0.8025	0	0	0	0.3830	0.00	4.6558	141	-7.30	0
FBgn0017578	FBtr0075018	2.2069	1	1	1	0.3396	-8.90	3.2670	159	-6.00	0
FBgn0017579	FBtr0076633	0.3454	0	0	0	0.4483	NA	-0.5799	29	NA	NA
FBgn0017581	FBtr0082535	0.5133	2	2	2	0.4220	-4.80	2.6126	519	-10.90	0
FBgn0017590	FBtr0084337	1.1342	4	4	4	0.4107	-9.20	2.2886	784	-3.70	0
FBgn0019624	FBtr0334890	2.0296	0	0	0	0.4043	-1.70	2.5889	47	-1.70	0
FBgn0019637	FBtr0078704	1.2216	0	0	0	0.3942	-1.00	0.1388	104	-2.20	0
FBgn0019643	FBtr0072254	1.2959	0	0	0	0.4586	-6.00	2.4339	338	-5.90	0
FBgn0019644	FBtr0076405	1.3473	0	0	0	0.4058	-7.30	1.9237	69	-6.90	0
FBgn0019650	FBtr0089185	1.9834	6	6	6	0.3985	0.00	-0.2243	527	-4.40	0
FBgn0019662	FBtr0076846	2.7666	0	0	0	0.5219	-1.70	3.3304	297	-5.30	0
FBgn0019686	FBtr0081329	1.4676	2	2	1	0.4483	-11.60	1.7918	319	-7.30	0
FBgn0019809	FBtr0079837	0.2689	1	1	0	0.4762	-2.60	0.5417	336	-5.70	0
FBgn0019830	FBtr0077731	0.9321	4	4	4	0.4067	-5.70	0.5648	504	-1.40	0
FBgn0019886	FBtr0072347	0.9455	1	1	1	0.4716	-0.30	1.2954	352	-6.60	0
FBgn0019890	FBtr0080562	0.9208	2	2	2	0.4270	-0.90	2.2474	281	-2.40	0
FBgn0019925	FBtr0083117	1.6570	1	1	1	0.4608	-2.80	3.2164	217	-7.80	0
FBgn0019932	FBtr0079994	3.4099	0	0	0	0.4655	-5.70	0.9843	58	-4.20	0
FBgn0019936	FBtr0083964	0.2720	0	0	0	0.3778	-3.40	1.9953	90	-8.70	0
FBgn0019938	FBtr0087511	0.4492	0	0	0	0.4490	-3.70	3.9172	98	-6.20	0
FBgn0019947	FBtr0333478	1.0778	1	1	1	0.4787	-9.90	-2.9128	188	-5.80	0
FBgn0019948	FBtr0072203	1.4483	0	0	0	0.3791	-7.90	1.8950	153	-2.30	0
FBgn0019949	FBtr0071937	1.9860	0	0	0	0.4088	-4.00	2.2572	137	-6.10	0
FBgn0019952	FBtr0334870	0.1955	0	0	0	0.5458	-7.50	-0.8349	306	-9.90	0
FBgn0019957	FBtr0084172	1.1132	0	0	0	0.3973	-5.70	3.5198	73	-4.90	0
FBgn0019960	FBtr0335199	0.5525	0	0	0	0.5385	-2.00	2.4217	143	-5.80	0
FBgn0019968	FBtr0346265	1.0497	1	1	1	0.4826	-0.70	0.7665	344	-5.10	0
FBgn0019972	FBtr0085482	2.2724	0	0	0	0.4250	-7.60	0.8787	240	-4.70	0
FBgn0019982	FBtr0077453	0.8460	0	0	0	0.4774	-4.40	1.3596	155	-7.30	0
FBgn0019990	FBtr0085787	0.4665	3	3	3	0.4381	-2.70	2.4943	331	-3.80	0
FBgn0020018	FBtr0084664	1.1359	0	0	0	0.4683	-5.00	0.9230	126	-5.30	0
FBgn0020224	FBtr0076614	1.9034	1	1	1	0.5155	-9.50	2.6857	355	-8.60	0
FBgn0020235	FBtr0085539	1.5567	0	0	0	0.5319	-11.00	0.3258	47	-12.30	0
FBgn0020236	FBtr0300596	0.5038	0	0	0	0.3818	-3.20	1.1601	110	-3.40	0
FBgn0020238	FBtr0083565	2.6339	0	0	0	0.4717	-6.30	3.3526	159	-5.30	0
FBgn0020248	FBtr0072713	0.1806	0	0	0	0.3706	-6.80	-4.5903	170	-5.30	0
FBgn0020249	FBtr0081844	1.0890	1	1	1	0.3582	-3.00	1.5679	134	-5.00	0
FBgn0020251	FBtr0076968	0.6692	20	20	18	0.4389	-2.50	1.9550	1310	-12.50	0
FBgn0020255	FBtr0073471	2.5304	0	0	0	0.3904	-3.30	0.7058	146	-1.80	0
FBgn0020257	FBtr0343014	0.9111	1	1	1	0.4361	-2.60	0.2468	266	-3.60	0
FBgn0020261	FBtr0074784	0.5130	3	3	3	0.4848	-4.40	2.2178	198	-8.40	0
FBgn0020269	FBtr0087477	0.7798	1	1	1	0.4237	-7.60	2.8459	354	-13.60	0
FBgn0020270	FBtr0080213	0.7927	1	1	1	0.3778	-0.20	1.9278	90	-10.70	0
FBgn0020272	FBtr0077211	0.4603	0	0	0	0.4571	NA	-2.3142	35	NA	NA
FBgn0020278	FBtr0084273	0.7853	5	5	5	0.4248	-4.30	0.3345	379	-4.70	0
FBgn0020279	FBtr0304682	0.9086	0	0	0	0.3810	-7.50	1.4091	63	-8.90	0
FBgn0020294	FBtr0333449	0.4666	1	1	1	0.4673	-4.70	2.8759	505	-8.00	0
FBgn0020299	FBtr0334956	0.7579	4	4	4	0.4514	-0.40	2.1823	350	-7.70	0
FBgn0020300	FBtr0075126	7.2795	3	3	3	0.3876	-5.30	-0.9749	387	-4.50	0
FBgn0020304	FBtr0302612	1.0534	0	0	0	0.5274	-7.30	1.9042	1003	-11.80	0
FBgn0020305	FBtr0078030	1.4840	0	0	0	0.4691	-1.30	1.4821	81	-10.30	0
FBgn0020306	FBtr0071603	0.4465	4	4	4	0.4167	-4.20	2.8256	204	-10.70	0
FBgn0020307	FBtr0071775	0.2373	3	3	0	0.5007	-4.60	1.7567	719	-7.80	0
FBgn0020309	FBtr0335476	0.4453	11	8	5	0.4819	-5.20	1.2409	772	-4.70	0
FBgn0020312	FBtr0071637	0.2973	5	4	4	0.4574	-4.50	3.3955	223	-3.60	0
FBgn0020369	FBtr0077189	1.3900	0	0	0	0.3492	0.00	1.6785	126	-4.30	0
FBgn0020370	FBtr0087775	1.0786	0	0	0	0.4867	-2.40	1.0811	113	-4.60	0
FBgn0020372	FBtr0072130	0.2906	2	2	1	0.4948	-2.10	0.6315	386	-10.90	0
FBgn0020377	FBtr0088004	1.9165	0	0	0	0.3800	0.00	-1.6599	100	-3.40	0
FBgn0020378	FBtr0310290	0.2056	0	0	0	0.4460	-4.30	1.6886	500	-5.30	0
FBgn0020379	FBtr0305995	0.3405	0	0	0	0.4238	-4.00	-0.0370	597	-2.60	0
FBgn0020381	FBtr0114561	1.2078	0	0	0	0.4194	-1.50	1.6509	62	-2.00	0
FBgn0020385	FBtr0082266	0.5365	0	0	0	0.6338	-9.30	3.1629	71	-13.50	0
FBgn0020386	FBtr0072468	0.9453	0	0	0	0.2419	-5.10	1.1454	62	0.00	0
FBgn0020388	FBtr0075969	1.2330	0	0	0	0.4054	-5.00	-1.4923	111	-10.60	0
FBgn0020389	FBtr0074887	0.5509	0	0	0	0.4131	-5.60	1.4635	213	-5.00	0
FBgn0020391	FBtr0087728	0.2378	2	2	1	0.4071	-2.10	1.2496	226	-6.10	0
FBgn0020392	FBtr0076728	2.5149	0	0	0	0.3333	-6.70	0.5793	102	-6.00	0
FBgn0020407	FBtr0083259	1.1111	0	0	0	0.3902	-6.80	2.0483	82	-3.60	0
FBgn0020412	FBtr0076236	0.6917	7	6	5	0.4104	-9.50	0.1942	1055	-6.20	0
FBgn0020414	FBtr0080864	1.3087	0	0	0	0.4769	-5.80	2.3800	130	-8.10	0
FBgn0020415	FBtr0080861	2.7473	0	0	0	0.4627	-10.10	1.9615	67	-6.70	0
FBgn0020440	FBtr0301883	1.0285	0	0	0	0.4891	-9.80	0.5259	92	-2.90	0
FBgn0020443	FBtr0344859	1.2239	0	0	0	0.5238	-5.30	1.7854	105	-5.70	0
FBgn0020445	FBtr0089979	0.4585	3	3	1	0.3776	-4.30	0.6865	678	-7.40	0
FBgn0020493	FBtr0083394	0.3916	4	4	3	0.4070	-3.70	-1.7238	570	-1.10	0
FBgn0020496	FBtr0334516	1.4822	2	2	2	0.4524	-0.90	2.9202	378	-5.00	0
FBgn0020497	FBtr0079663	1.5801	0	0	0	0.5040	-9.60	0.7647	371	-5.30	1
FBgn0020503	FBtr0080975	0.5793	0	0	0	0.2977	-2.20	3.5042	262	-4.80	0
FBgn0020510	FBtr0082910	1.1153	2	2	2	0.4156	-5.70	-1.3431	154	-3.90	0
FBgn0020513	FBtr0073705	1.2296	1	1	0	0.4713	-1.20	1.5059	244	-7.30	0
FBgn0020521	FBtr0072312	0.5933	2	2	2	0.4324	-8.70	1.5909	370	-9.10	0
FBgn0020545	FBtr0334794	0.5981	0	0	0	0.5682	-5.80	0.8787	88	-7.00	0
FBgn0020616	FBtr0079349	0.5464	1	1	1	0.3136	-3.30	2.1191	118	-3.40	0
FBgn0020617	FBtr0342783	0.1837	1	1	1	0.4527	-4.20	-2.2669	296	-8.60	0
FBgn0020618	FBtr0079565	0.1348	0	0	0	0.4805	-2.40	2.1823	77	-5.30	0
FBgn0020620	FBtr0087605	1.0869	3	3	3	0.5274	-0.40	0.1610	292	-5.10	0
FBgn0020621	FBtr0088601	1.0983	2	2	2	0.3976	-6.60	1.6494	420	-7.50	0
FBgn0020622	FBtr0331208	1.0401	6	5	4	0.4846	0.00	-0.2342	553	-8.40	0
FBgn0020626	FBtr0084801	0.5106	1	1	1	0.5372	-9.20	1.3780	363	-2.90	0
FBgn0020633	FBtr0076585	0.9643	0	0	0	0.4052	-0.40	3.8776	153	-6.30	0
FBgn0020637	FBtr0077059	1.0001	0	0	0	0.4918	-1.50	2.7001	61	-4.90	0
FBgn0020638	FBtr0077058	2.4292	0	0	0	0.4918	-1.50	2.7001	61	-5.90	0
FBgn0020639	FBtr0077057	0.5805	0	0	0	0.3922	-3.10	3.6241	51	-3.00	0
FBgn0020641	FBtr0333581	0.0412	0	0	0	0.5270	-2.70	3.5722	74	-3.90	0
FBgn0020642	FBtr0076991	0.7055	0	0	0	0.3913	0.00	3.1990	92	-3.10	0
FBgn0020647	FBtr0301418	0.3682	2	2	1	0.4543	-5.70	-1.8294	394	-7.10	0
FBgn0020653	FBtr0071167	0.9266	0	0	0	0.4468	-2.50	2.3923	188	-4.10	0
FBgn0020655	FBtr0075981	1.8092	1	1	0	0.4783	-3.20	-0.1360	368	-9.50	0
FBgn0020660	FBtr0113680	2.9064	0	0	0	0.2353	-0.20	1.4903	68	-4.50	0
FBgn0020762	FBtr0112899	0.4187	8	8	5	0.4328	-2.30	0.0500	751	-7.60	0
FBgn0020764	FBtr0072151	0.4291	0	0	0	0.5044	-5.30	-0.9749	113	-2.70	0
FBgn0020767	FBtr0329879	0.3444	5	5	4	0.4239	-4.50	1.2157	427	-0.40	0
FBgn0020887	FBtr0074917	0.6077	11	11	11	0.4494	0.00	3.3067	474	-5.60	0
FBgn0020907	FBtr0083361	1.4475	0	0	0	0.4350	-0.10	1.8581	200	-7.80	0
FBgn0020908	FBtr0334933	1.5139	1	1	1	0.2719	-4.80	2.4359	114	-5.70	0
FBgn0020909	FBtr0073820	1.6754	0	0	0	0.4130	-4.20	1.8441	92	-8.10	0
FBgn0020910	FBtr0336783	0.2419	0	0	0	0.3889	NA	1.6156	36	NA	NA
FBgn0020912	FBtr0089391	1.0930	3	3	2	0.5014	-1.70	-0.6065	1081	-5.90	0
FBgn0020930	FBtr0339705	0.2806	2	2	2	0.4261	-6.20	0.8554	115	-4.10	0
FBgn0021742	FBtr0073400	1.1821	0	0	0	0.4928	-7.00	1.7328	69	-4.90	0
FBgn0021750	FBtr0083086	0.9228	0	0	0	0.3491	-7.30	2.9210	169	-5.40	0
FBgn0021760	FBtr0089461	1.3864	4	4	4	0.4477	-3.30	1.7854	784	-8.10	0
FBgn0021761	FBtr0089881	0.4155	0	0	0	0.4750	-0.60	1.8818	160	-6.80	0
FBgn0021764	FBtr0340197	1.5736	5	5	5	0.4578	-1.10	-0.8940	367	-8.50	0
FBgn0021765	FBtr0074511	2.0120	0	0	0	0.5041	-0.30	2.6701	123	-3.60	0
FBgn0021767	FBtr0345983	0.5029	1	1	1	0.4232	-3.60	0.5695	775	-11.60	0
FBgn0021768	FBtr0075328	1.1430	0	0	0	0.4048	-0.20	1.8523	126	-11.30	0
FBgn0021776	FBtr0083847	0.5041	3	3	3	0.3600	-0.60	2.2547	325	-3.60	0
FBgn0021795	FBtr0088153	1.0131	2	1	0	0.4702	-1.90	2.9344	151	-7.50	0
FBgn0021796	FBtr0080422	0.4555	3	3	3	0.4869	-2.50	-0.0604	306	-2.40	0
FBgn0021800	FBtr0077497	0.5796	3	3	3	0.4280	-10.00	-0.4642	264	-2.10	0
FBgn0021814	FBtr0088825	1.9727	0	0	0	0.3736	-1.70	0.7075	91	-4.20	0
FBgn0021818	FBtr0086962	0.5290	1	1	1	0.5167	-10.00	0.4069	120	-3.30	0
FBgn0021825	FBtr0088641	2.0252	0	0	0	0.3770	-1.90	2.4160	122	-1.00	0
FBgn0021847	FBtr0086000	0.6344	1	1	1	0.4365	-1.90	-1.8113	181	0.00	0
FBgn0021856	FBtr0330677	2.2562	0	0	0	0.4030	-1.00	3.1991	67	-6.40	0
FBgn0021872	FBtr0310044	0.7812	4	4	4	0.4543	-1.60	3.1812	328	-1.50	0
FBgn0021874	FBtr0078075	0.9399	0	0	0	0.4561	-6.90	0.2160	57	-2.90	0
FBgn0021875	FBtr0072253	0.8275	0	0	0	0.4074	NA	2.8522	27	NA	NA
FBgn0021895	FBtr0072234	0.5853	1	1	1	0.5128	-1.40	0.5371	195	-5.70	0
FBgn0021906	FBtr0334843	0.9888	0	0	0	0.3929	-4.70	3.8795	84	-6.10	0
FBgn0021944	FBtr0346584	0.7667	0	0	0	0.3878	-3.60	1.6861	98	-1.00	0
FBgn0021967	FBtr0077520	1.5234	0	0	0	0.4066	-4.90	1.4746	91	-13.10	0
FBgn0021979	FBtr0343188	1.6138	0	0	0	0.5000	-4.20	3.7318	100	-4.50	0
FBgn0021995	FBtr0088788	1.0102	0	0	0	0.3947	-5.80	3.8573	76	-10.50	0
FBgn0022023	FBtr0079031	0.7119	0	0	0	0.5111	-6.80	3.5719	45	-6.80	0
FBgn0022027	FBtr0088694	0.5058	1	1	1	0.3600	-1.90	1.8993	75	-7.70	0
FBgn0022029	FBtr0086912	1.2607	0	0	0	0.4902	-5.10	2.3378	102	-8.50	0
FBgn0022069	FBtr0080473	1.3387	0	0	0	0.4425	-2.70	0.2883	113	-6.20	0
FBgn0022097	FBtr0087335	1.8411	0	0	0	0.4020	0.00	3.7408	102	-7.00	0
FBgn0022153	FBtr0331447	0.2984	1	1	0	0.5141	-9.20	2.8787	142	-12.10	0
FBgn0022160	FBtr0087307	0.5693	0	0	0	0.5000	-6.10	1.7582	124	-6.90	0
FBgn0022213	FBtr0080930	1.3363	1	1	0	0.4043	0.00	3.9037	141	-3.70	0
FBgn0022224	FBtr0086211	6.1390	0	0	0	0.3226	-4.30	1.5642	93	-9.50	0
FBgn0022238	FBtr0086777	5.5321	0	0	0	0.4980	-2.50	-2.2570	249	-1.80	0
FBgn0022246	FBtr0336990	1.7486	0	0	0	0.4643	-6.70	2.4722	56	-6.70	0
FBgn0022288	FBtr0086043	1.1297	0	0	0	0.3939	-3.30	-0.0118	99	-2.00	0
FBgn0022338	FBtr0083707	1.9361	0	0	0	0.5000	-3.50	-2.8732	148	-0.80	0
FBgn0022343	FBtr0072391	0.9589	0	0	0	0.3596	-0.40	0.4738	89	-7.90	0
FBgn0022344	FBtr0083358	1.1120	0	0	0	0.3488	-3.30	1.4259	43	-3.00	0
FBgn0022349	FBtr0085839	1.1731	1	1	0	0.4545	-5.30	2.3517	363	-6.40	0
FBgn0022359	FBtr0082324	1.6283	0	0	0	0.4085	-3.50	1.3583	71	-8.40	0
FBgn0022361	FBtr0089995	4.5790	4	4	4	0.3924	-6.10	0.1289	316	-8.70	0
FBgn0022382	FBtr0088437	1.8259	0	0	0	0.4489	-5.60	1.7565	352	-3.80	0
FBgn0022699	FBtr0077017	0.8024	1	1	0	0.4202	-7.60	3.9032	119	-7.70	0
FBgn0022702	FBtr0072795	0.3390	0	0	0	0.5000	-9.60	-1.4276	100	-7.90	0
FBgn0022708	FBtr0072163	1.0982	1	1	1	0.4196	-3.30	1.7960	112	-3.70	0
FBgn0022709	FBtr0076018	0.3684	0	0	0	0.4903	-8.20	1.5572	361	-8.40	0
FBgn0022710	FBtr0332497	0.2393	8	8	8	0.4589	-2.50	2.6280	950	-8.10	0
FBgn0022724	FBtr0074514	1.5359	0	0	0	0.4222	-2.00	-0.9977	90	-10.00	0
FBgn0022740	FBtr0089547	2.4607	0	0	0	0.4000	-4.60	1.6431	170	-5.50	0
FBgn0022764	FBtr0087887	0.8991	2	2	2	0.4836	-5.00	2.7378	550	-2.70	0
FBgn0022768	FBtr0070685	0.6835	5	5	5	0.4123	-1.80	1.1573	747	-6.90	0
FBgn0022770	FBtr0077335	0.8962	0	0	0	0.3730	-2.10	1.8407	126	-4.00	0
FBgn0022772	FBtr0088959	0.9730	0	0	0	0.4846	-11.20	0.8327	130	-6.50	0
FBgn0022774	FBtr0074961	0.6268	0	0	0	0.5165	-3.30	2.9878	91	-5.60	0
FBgn0022786	FBtr0071070	0.2210	0	0	0	0.2788	-0.30	-1.7924	104	-5.40	0
FBgn0022787	FBtr0301715	0.2959	4	4	4	0.4580	-1.40	1.0826	583	-3.60	0
FBgn0022800	FBtr0084874	0.6652	1	1	1	0.4928	-13.30	1.5991	209	-8.40	0
FBgn0022893	FBtr0085919	1.7195	0	0	0	0.3667	-1.40	4.2587	240	-3.50	0
FBgn0022935	FBtr0077016	0.4325	0	0	0	0.4583	-10.50	2.8058	144	-8.70	0
FBgn0022936	FBtr0078439	1.3361	0	0	0	0.5556	NA	2.5773	9	NA	NA
FBgn0022942	FBtr0070683	1.0540	1	1	1	0.4667	-3.90	1.0043	315	-15.80	0
FBgn0022943	FBtr0083551	2.5688	0	0	0	0.3088	-1.80	1.7328	68	-1.90	0
FBgn0022959	FBtr0076027	1.2954	0	0	0	0.4924	-3.40	1.3912	264	-6.20	0
FBgn0022960	FBtr0086183	1.4534	1	1	1	0.4524	-3.20	3.1706	294	-9.70	0
FBgn0022981	FBtr0078859	0.8862	2	2	2	0.4458	-7.50	2.2687	83	-2.70	0
FBgn0022984	FBtr0290254	2.1509	1	1	1	0.2812	-6.30	4.2806	96	-2.50	0
FBgn0022985	FBtr0071828	1.4384	1	1	1	0.5214	-3.30	-0.2419	257	-9.20	0
FBgn0022986	FBtr0071843	2.2621	1	1	1	0.3577	-0.70	1.3441	123	-0.70	0
FBgn0022987	FBtr0086923	3.2545	0	0	0	0.3942	-8.70	1.3843	137	-4.80	0
FBgn0023000	FBtr0072570	1.7695	1	1	1	0.3878	-5.00	-0.1022	147	-9.60	0
FBgn0023001	FBtr0100141	0.6181	7	7	7	0.4344	-5.30	1.1857	762	-6.80	0
FBgn0023023	FBtr0089686	1.1622	1	1	1	0.4060	-3.90	-0.3124	133	-4.60	0
FBgn0023081	FBtr0072287	0.5180	1	1	1	0.4144	-4.10	2.0607	111	-6.40	0
FBgn0023083	FBtr0344290	1.8792	2	2	2	0.4750	-5.30	-0.2072	819	-7.50	0
FBgn0023094	FBtr0074924	0.2474	0	0	0	0.4146	-7.40	-0.6273	164	-9.40	0
FBgn0023095	FBtr0075832	1.4026	6	6	6	0.4713	-3.20	-1.4051	887	-4.70	0
FBgn0023097	FBtr0334638	0.9970	5	5	5	0.4624	-10.10	3.5458	705	-4.10	0
FBgn0023129	FBtr0076457	1.9555	0	0	0	0.4411	-2.50	1.4028	297	-7.00	0
FBgn0023130	FBtr0333116	0.3766	2	2	0	0.5852	-8.50	1.4934	352	-6.70	1
FBgn0023143	FBtr0088499	0.7820	0	0	0	0.5035	-4.50	-0.9513	288	-7.50	0
FBgn0023167	FBtr0087986	2.6063	0	0	0	0.3904	-1.20	1.5679	146	-3.00	0
FBgn0023169	FBtr0070216	0.5864	0	0	0	0.5243	-9.40	0.4023	267	-20.20	0
FBgn0023170	FBtr0072185	1.4412	0	0	0	0.4390	NA	2.8459	41	NA	0
FBgn0023171	FBtr0088883	1.5116	1	1	1	0.2903	NA	-0.1056	31	NA	NA
FBgn0023172	FBtr0086969	0.4511	4	4	4	0.4144	-3.80	-1.6713	473	-4.40	0
FBgn0023174	FBtr0075629	2.4192	0	0	0	0.3248	-1.20	0.9651	117	-3.40	0
FBgn0023175	FBtr0089998	1.9716	0	0	0	0.3866	-3.00	-0.3132	119	-1.20	0
FBgn0023177	FBtr0077324	1.2834	1	1	1	0.5378	-13.20	1.1328	251	-4.20	0
FBgn0023180	FBtr0088482	2.8263	1	1	1	0.3736	-7.70	1.9709	91	-6.20	0
FBgn0023181	FBtr0072425	0.4389	0	0	0	0.4098	-6.90	1.8688	122	-6.40	0
FBgn0023212	FBtr0083947	2.3154	0	0	0	0.5761	-3.30	1.9637	394	-6.20	0
FBgn0023213	FBtr0089243	2.4621	5	5	5	0.3184	-7.30	0.0326	380	-12.40	0
FBgn0023214	FBtr0086652	0.9931	1	1	1	0.3916	-4.60	1.9608	618	-6.50	0
FBgn0023215	FBtr0301823	0.9060	0	0	0	0.3720	-7.20	-1.9970	793	-3.40	0
FBgn0023216	FBtr0307279	0.8840	0	0	0	0.4959	-6.40	0.4725	121	-0.90	0
FBgn0023388	FBtr0081503	1.0405	2	2	2	0.3904	-5.10	3.5482	333	-7.40	1
FBgn0023395	FBtr0074998	0.7902	0	0	0	0.3816	-0.20	-0.1139	76	-2.50	0
FBgn0023407	FBtr0080513	0.6775	12	11	10	0.5134	-6.60	-1.2796	748	-8.20	0
FBgn0023416	FBtr0085897	0.3348	4	4	4	0.4029	-0.80	2.0639	412	-8.20	0
FBgn0023441	FBtr0087346	0.5478	5	5	3	0.3821	-4.90	3.2651	602	-8.50	0
FBgn0023458	FBtr0303341	0.4317	2	2	2	0.3741	-6.40	-0.2741	139	-0.80	0
FBgn0023477	FBtr0072141	1.1704	0	0	0	0.4000	NA	0.1791	20	NA	NA
FBgn0023496	FBtr0080124	0.7192	0	0	0	0.4807	-3.20	1.1276	181	-8.90	0
FBgn0023506	FBtr0071198	2.1184	0	0	0	0.3152	-0.90	0.5777	92	-2.20	0
FBgn0023507	FBtr0070381	0.6673	0	0	0	0.4863	0.00	1.8157	183	-6.00	0
FBgn0023508	FBtr0070317	0.3520	3	3	2	0.5444	-2.70	0.5102	777	-6.80	1
FBgn0023509	FBtr0070315	0.6907	0	0	0	0.3860	-3.00	-3.0277	114	-4.90	0
FBgn0023510	FBtr0344155	0.3895	3	3	3	0.5039	-6.00	3.0033	647	-5.60	1
FBgn0023511	FBtr0070353	0.6049	1	1	0	0.4717	-1.20	0.8307	53	-8.30	0
FBgn0023512	FBtr0070351	0.4777	0	0	0	0.4706	-6.30	1.6409	51	-6.50	0
FBgn0023513	FBtr0070310	0.6407	0	0	0	0.4906	-4.40	2.2753	53	-4.40	0
FBgn0023514	FBtr0070312	1.1666	1	1	1	0.3909	-1.40	3.1515	110	-6.70	0
FBgn0023515	FBtr0070369	0.8474	0	0	0	0.4040	-0.10	3.8776	99	-0.40	0
FBgn0023516	FBtr0070368	0.8492	0	0	0	0.4483	-3.50	2.4217	116	-4.50	0
FBgn0023517	FBtr0070366	0.9879	0	0	0	0.2857	NA	0.4817	35	NA	NA
FBgn0023518	FBtr0070362	0.6400	1	1	1	0.5086	-5.80	-2.6330	175	-2.10	0
FBgn0023519	FBtr0332579	2.1264	1	1	1	0.3626	0.00	1.3181	91	-8.50	0
FBgn0023520	FBtr0070349	0.7950	0	0	0	0.3837	-1.80	-1.2087	86	-6.60	0
FBgn0023521	FBtr0070321	1.5277	0	0	0	0.4125	-1.10	-0.1739	80	-9.10	0
FBgn0023522	FBtr0070318	1.2416	1	1	1	0.4951	-2.60	-0.6581	103	-7.60	0
FBgn0023525	FBtr0342768	0.2602	0	0	0	0.6364	NA	-0.7938	22	NA	NA
FBgn0023526	FBtr0070408	0.7980	1	1	0	0.3961	-4.90	2.2933	722	-13.60	0
FBgn0023527	FBtr0070398	1.0273	0	0	0	0.4746	-0.60	0.0474	59	-1.40	0
FBgn0023528	FBtr0345315	2.5823	3	3	3	0.4272	-0.40	2.6904	618	-1.10	0
FBgn0023529	FBtr0070411	0.9591	0	0	0	0.4416	-2.40	1.8981	197	0.00	0
FBgn0023530	FBtr0070283	1.7074	1	1	1	0.4340	-6.60	0.6292	288	-12.40	0
FBgn0023531	FBtr0089815	0.2513	1	1	0	0.5253	-7.20	0.1260	217	-11.40	0
FBgn0023535	FBtr0070088	0.3938	0	0	0	0.4805	-6.00	3.3437	77	-12.70	0
FBgn0023536	FBtr0070079	0.7877	1	1	1	0.3036	-5.10	2.7725	112	-4.10	0
FBgn0023537	FBtr0070092	0.6410	0	0	0	0.5513	0.00	2.1561	78	-7.20	0
FBgn0023540	FBtr0310501	0.1669	0	0	0	0.5813	-5.10	0.5386	203	-4.60	0
FBgn0023541	FBtr0070426	0.0314	0	0	0	0.4810	-2.70	2.9704	79	-3.90	0
FBgn0023542	FBtr0070425	1.0182	0	0	0	0.4308	-4.10	-2.6444	130	-1.10	0
FBgn0023545	FBtr0070347	1.8706	0	0	0	0.4706	-7.40	1.9626	68	-8.60	0
FBgn0023549	FBtr0070393	0.3886	1	1	1	0.5087	-3.30	3.5964	629	-8.50	0
FBgn0024150	FBtr0305501	2.2899	0	0	0	0.5256	-12.00	0.2575	78	-3.10	0
FBgn0024177	FBtr0076983	0.7705	0	0	0	0.3659	-1.70	1.1495	123	-7.40	0
FBgn0024182	FBtr0100536	0.7344	0	0	0	0.4194	NA	-0.5615	31	NA	NA
FBgn0024183	FBtr0080720	1.5470	0	0	0	0.5022	-1.50	1.6900	225	-8.90	0
FBgn0024187	FBtr0076768	0.6196	5	5	4	0.4321	-2.40	1.3886	641	-4.00	0
FBgn0024188	FBtr0088126	5.8313	0	0	0	0.4370	-2.70	3.1927	119	-6.10	0
FBgn0024189	FBtr0088635	0.4023	3	3	3	0.5469	-4.50	3.3304	576	-8.40	0
FBgn0024191	FBtr0345545	0.8075	1	1	1	0.3882	-2.80	0.4725	85	-4.30	0
FBgn0024194	FBtr0073029	0.3163	0	0	0	0.5263	NA	-1.0393	19	NA	NA
FBgn0024196	FBtr0086920	5.4232	0	0	0	0.3434	-8.60	3.2912	99	-2.30	0
FBgn0024222	FBtr0304804	0.9038	2	2	2	0.3861	-3.80	2.4831	101	-6.90	0
FBgn0024227	FBtr0080180	1.5100	0	0	0	0.2991	0.00	0.9644	117	-0.10	0
FBgn0024230	FBtr0081288	0.9890	3	3	2	0.4656	-7.10	-1.5216	131	-15.20	0
FBgn0024232	FBtr0336682	0.6898	0	0	0	0.3898	-3.60	-0.9065	236	-7.10	0
FBgn0024234	FBtr0343274	0.5846	0	0	0	0.4107	-4.70	1.4529	112	-3.90	0
FBgn0024236	FBtr0076624	1.0023	6	6	6	0.4823	-5.50	2.8035	622	-3.00	0
FBgn0024238	FBtr0074441	0.7488	1	1	1	0.3677	-2.50	2.8281	495	-5.50	0
FBgn0024244	FBtr0077531	3.8256	0	0	0	0.5145	-5.80	3.7163	758	-4.20	0
FBgn0024245	FBtr0081224	1.2491	4	4	4	0.4356	-2.90	-3.6117	388	-5.50	0
FBgn0024248	FBtr0303904	2.1281	1	1	1	0.3750	-1.30	1.3085	72	-7.30	0
FBgn0024249	FBtr0087183	0.2547	0	0	0	0.5000	NA	0.1952	38	NA	NA
FBgn0024250	FBtr0071048	1.6711	2	2	2	0.3914	0.00	1.7399	534	-7.00	0
FBgn0024251	FBtr0100599	0.3916	1	1	1	0.3611	-1.30	2.1542	144	-1.10	0
FBgn0024273	FBtr0085352	0.7450	3	3	3	0.5150	0.00	-0.9890	266	-5.20	0
FBgn0024277	FBtr0072644	0.2784	5	5	5	0.4743	-3.80	0.0894	350	-4.70	0
FBgn0024285	FBtr0079875	0.8227	0	0	0	0.4380	-8.60	3.1706	137	-5.90	0
FBgn0024289	FBtr0339932	0.5223	0	0	0	0.3768	-2.50	2.9020	69	-7.20	0
FBgn0024291	FBtr0080434	1.3517	2	2	1	0.4637	-15.40	3.5198	427	-9.90	0
FBgn0024294	FBtr0089041	1.5290	0	0	0	0.5278	NA	1.2853	36	NA	NA
FBgn0024314	FBtr0304710	0.5194	1	1	1	0.4968	-3.50	0.7459	157	-4.00	0
FBgn0024315	FBtr0087114	0.6706	1	1	1	0.4547	0.00	2.1823	750	-9.10	0
FBgn0024320	FBtr0303907	1.4655	1	1	1	0.3922	-6.30	0.4355	102	-3.80	0
FBgn0024321	FBtr0306742	1.0363	1	1	1	0.4387	-5.60	-0.9000	563	-11.20	0
FBgn0024326	FBtr0300443	1.4226	2	2	1	0.4842	-3.70	2.9299	285	-2.20	0
FBgn0024329	FBtr0083684	0.4707	2	2	2	0.4385	-3.70	3.3149	358	-6.40	0
FBgn0024330	FBtr0339719	3.5280	0	0	0	0.4748	-5.50	3.3086	457	-14.50	1
FBgn0024332	FBtr0070762	0.5218	0	0	0	0.4225	-8.40	1.7997	142	-7.60	0
FBgn0024352	FBtr0078131	1.6984	0	0	0	0.4067	-2.60	2.4788	150	-3.30	0
FBgn0024360	FBtr0070236	0.2625	0	0	0	0.5225	-13.60	0.5433	111	-1.20	0
FBgn0024361	FBtr0070211	1.0617	0	0	0	0.5145	-1.00	1.7617	138	-3.30	0
FBgn0024362	FBtr0070209	0.7929	4	2	2	0.4974	-5.30	2.2046	386	-8.50	0
FBgn0024364	FBtr0070212	0.7793	0	0	0	0.5062	-6.00	0.7481	81	-6.90	0
FBgn0024365	FBtr0070235	0.9042	3	3	2	0.5335	-6.00	-0.0433	493	-1.30	0
FBgn0024366	FBtr0070238	0.6980	2	2	2	0.4738	-5.20	-0.2994	344	-7.70	0
FBgn0024371	FBtr0081501	1.5847	3	3	3	0.4286	-5.60	-0.0576	189	0.00	0
FBgn0024432	FBtr0083575	2.8827	0	0	0	0.4301	-5.00	0.7407	193	-4.60	0
FBgn0024491	FBtr0083279	3.7145	0	0	0	0.3333	-1.90	1.4611	120	-5.20	0
FBgn0024509	FBtr0084409	0.7098	0	0	0	0.4951	-7.30	3.1352	103	-5.30	0
FBgn0024510	FBtr0072790	0.9024	0	0	0	0.4140	-2.50	1.0949	215	-6.60	0
FBgn0024542	FBtr0333367	2.6739	0	0	0	0.4138	-3.30	-2.7870	58	-8.10	0
FBgn0024555	FBtr0082817	1.2132	3	3	3	0.4561	-4.10	1.7857	524	-6.80	0
FBgn0024556	FBtr0087670	0.7987	0	0	0	0.4656	-1.90	1.7392	131	-3.20	0
FBgn0024558	FBtr0084280	0.7354	0	0	0	0.5429	-8.50	0.5631	105	-13.40	0
FBgn0024689	FBtr0346627	1.7880	0	0	0	0.3265	-4.80	1.3609	49	-8.40	0
FBgn0024698	FBtr0089258	0.9878	1	1	1	0.4194	-2.10	1.7692	124	-3.00	0
FBgn0024728	FBtr0089090	1.7462	2	2	2	0.2625	-2.30	1.4624	80	-1.40	0
FBgn0024732	FBtr0087978	2.3407	1	1	1	0.4167	-2.60	1.2259	252	-4.50	0
FBgn0024733	FBtr0299869	1.0461	0	0	0	0.4884	-10.70	2.8957	43	-10.70	0
FBgn0024734	FBtr0080856	3.3758	7	7	7	0.3670	-1.10	-4.9147	1365	-7.60	0
FBgn0024754	FBtr0087351	0.6841	0	0	0	0.3590	0.00	2.1649	234	-5.00	0
FBgn0024804	FBtr0113715	4.1867	0	0	0	0.2712	0.00	3.1812	59	-5.30	0
FBgn0024806	FBtr0072520	1.0149	3	3	3	0.3799	-0.90	-0.1777	329	-0.30	0
FBgn0024807	FBtr0301292	0.9404	16	16	10	0.4397	-1.90	0.2832	1153	-6.10	0
FBgn0024811	FBtr0089113	3.8811	2	2	2	0.3160	-4.40	1.8311	231	-8.50	0
FBgn0024814	FBtr0300813	1.8741	0	0	0	0.5224	-3.10	1.2757	67	-10.30	0
FBgn0024833	FBtr0082114	1.9154	1	1	1	0.5109	-5.50	1.2847	276	-3.60	0
FBgn0024836	FBtr0300578	0.8257	0	0	0	0.4024	-8.50	-1.7072	594	-3.30	0
FBgn0024841	FBtr0085458	2.0574	0	0	0	0.4697	-1.70	2.2547	66	-4.10	0
FBgn0024846	FBtr0080534	1.1307	1	1	1	0.4498	-2.90	2.6695	209	-5.40	0
FBgn0024887	FBtr0078181	2.0024	0	0	0	0.3778	-1.10	0.7552	90	-5.10	0
FBgn0024889	FBtr0074881	1.5448	1	1	1	0.4911	-2.40	2.2879	112	-2.00	0
FBgn0024897	FBtr0070272	0.7868	0	0	0	0.5098	-5.10	3.2274	153	-7.60	0
FBgn0024909	FBtr0114520	2.7216	0	0	0	0.3855	-3.40	1.3139	83	-3.70	0
FBgn0024912	FBtr0081697	3.8503	0	0	0	0.4231	-6.90	-0.8036	78	-9.00	0
FBgn0024920	FBtr0077679	0.9566	0	0	0	0.3529	-4.90	2.5231	68	-15.80	0
FBgn0024921	FBtr0077000	2.8631	0	0	0	0.3733	-0.40	3.9693	150	-3.60	0
FBgn0024945	FBtr0072483	1.3355	0	0	0	0.5325	-5.20	-2.2587	77	-8.00	0
FBgn0024947	FBtr0332459	1.4460	0	0	0	0.4688	-4.40	1.8408	192	-7.80	0
FBgn0024956	FBtr0088255	1.1914	0	0	0	0.4128	-2.10	0.7428	109	-0.10	0
FBgn0024957	FBtr0082259	1.1866	0	0	0	0.3889	-5.00	1.4791	54	-4.10	0
FBgn0024958	FBtr0084327	0.5794	0	0	0	0.4127	-0.10	2.7507	63	-4.20	0
FBgn0024973	FBtr0070498	0.4790	2	2	2	0.4671	-9.20	1.2079	152	-3.00	0
FBgn0024975	FBtr0070488	0.5636	0	0	0	0.3958	-0.30	-2.1227	96	-6.90	0
FBgn0024983	FBtr0100475	1.0635	0	0	0	0.5049	-11.70	1.4847	206	-6.60	0
FBgn0024984	FBtr0070392	2.3872	0	0	0	0.4805	-2.40	0.7573	77	-6.30	0
FBgn0024985	FBtr0070225	0.4668	2	2	1	0.5122	-9.60	-3.1930	490	-1.10	0
FBgn0024986	FBtr0070233	2.9719	0	0	0	0.4968	-0.70	0.9707	157	-1.60	0
FBgn0024987	FBtr0070215	2.8928	0	0	0	0.4720	-4.60	-1.2912	161	-5.10	0
FBgn0024989	FBtr0070067	1.2335	1	1	1	0.4058	-1.50	2.9444	207	-4.70	0
FBgn0024991	FBtr0310649	0.3299	0	0	0	0.5098	-10.70	0.8058	51	-10.90	0
FBgn0024992	FBtr0070502	0.5734	0	0	0	0.4649	-9.30	1.4529	228	-3.60	0
FBgn0024993	FBtr0070478	1.4233	0	0	0	0.3721	-2.90	-0.3391	86	-1.60	0
FBgn0024994	FBtr0070501	1.0239	0	0	0	0.5111	-5.70	2.3430	225	-3.70	0
FBgn0024996	FBtr0070479	1.1303	1	1	1	0.4286	-0.40	1.8075	147	-1.10	0
FBgn0024998	FBtr0070499	1.3643	0	0	0	0.3836	-2.70	3.1352	219	-3.80	0
FBgn0025109	FBtr0077643	0.5255	2	2	2	0.4651	-9.50	1.7964	129	-5.40	0
FBgn0025111	FBtr0073426	0.2920	0	0	0	0.3874	-4.90	2.5219	111	-9.20	0
FBgn0025117	FBtr0335504	0.5410	0	0	0	0.5000	-7.30	1.9652	94	-7.30	0
FBgn0025185	FBtr0088980	0.7314	0	0	0	0.3519	-6.40	0.9379	54	-3.80	0
FBgn0025186	FBtr0071774	0.5955	4	4	4	0.4967	-5.60	0.8154	606	-5.40	0
FBgn0025286	FBtr0088525	0.5061	0	0	0	0.4583	-7.80	3.0453	72	-11.20	0
FBgn0025335	FBtr0343277	0.6897	0	0	0	0.4412	NA	2.3185	34	NA	NA
FBgn0025336	FBtr0072225	0.8610	1	1	1	0.3253	-1.40	0.9554	83	-3.20	0
FBgn0025352	FBtr0072226	1.8020	0	0	0	0.4231	-5.10	2.0537	78	-3.90	0
FBgn0025355	FBtr0076203	1.1624	6	6	6	0.4431	-3.40	-0.2199	404	-11.30	0
FBgn0025360	FBtr0329885	0.3147	4	4	2	0.5096	-2.60	3.2006	675	-10.50	0
FBgn0025366	FBtr0080017	1.3343	0	0	0	0.3492	-5.80	2.0002	63	-5.60	0
FBgn0025373	FBtr0088170	1.9877	0	0	0	0.3953	-4.20	3.7226	86	-6.90	0
FBgn0025381	FBtr0070259	0.5591	1	1	1	0.5648	-0.70	0.7365	687	-11.80	0
FBgn0025382	FBtr0070294	0.0661	2	1	1	0.5874	-6.00	0.1403	778	-3.50	0
FBgn0025388	FBtr0300754	1.2422	2	2	2	0.3942	-5.50	0.8569	104	-2.90	0
FBgn0025393	FBtr0070285	0.5136	0	0	0	0.4595	NA	1.4624	37	NA	NA
FBgn0025394	FBtr0339590	2.7332	3	3	3	0.5344	-8.90	1.7595	393	-6.70	0
FBgn0025455	FBtr0333124	0.9922	6	6	5	0.5182	-5.80	2.2987	716	-4.80	0
FBgn0025456	FBtr0089896	3.6106	0	0	0	0.4600	-3.00	0.1942	50	-4.90	0
FBgn0025457	FBtr0085465	1.2172	0	0	0	0.3628	-4.30	3.2651	113	-9.60	0
FBgn0025463	FBtr0073741	1.2401	0	0	0	0.4222	-3.70	2.1514	135	-8.10	0
FBgn0025469	FBtr0088824	0.7216	0	0	0	0.4496	-6.90	-0.1446	129	-7.60	0
FBgn0025519	FBtr0087185	0.6595	2	2	1	0.3529	-2.50	-3.3476	119	-3.60	0
FBgn0025525	FBtr0072639	0.7610	2	2	2	0.4187	-1.20	2.6724	406	-7.00	0
FBgn0025549	FBtr0071066	1.6521	6	6	5	0.4211	-0.60	2.6483	767	-7.50	0
FBgn0025558	FBtr0075314	2.1115	0	0	0	0.3333	-11.40	-0.1511	90	-5.60	0
FBgn0025571	FBtr0083456	0.7416	0	0	0	0.4363	-6.00	1.1448	204	-3.70	0
FBgn0025574	FBtr0084527	1.2972	3	3	3	0.4327	-6.40	4.6059	483	-2.20	0
FBgn0025582	FBtr0075345	0.9890	0	0	0	0.4537	-3.20	1.3322	108	-7.00	0
FBgn0025583	FBtr0086664	0.3491	0	0	0	0.3662	-0.40	2.3864	71	-6.20	0
FBgn0025592	FBtr0072529	1.4569	1	1	1	0.4155	-4.20	4.2307	207	-3.30	0
FBgn0025608	FBtr0343115	1.3327	2	2	2	0.5042	-2.90	2.3785	361	-2.10	0
FBgn0025615	FBtr0070690	1.9500	1	1	1	0.4265	-3.60	-5.3049	68	-1.10	0
FBgn0025621	FBtr0070140	0.2701	1	1	0	0.5424	-6.60	-2.5995	330	-5.40	0
FBgn0025624	FBtr0070375	1.0975	0	0	0	0.4872	-2.80	0.2747	117	-2.30	0
FBgn0025626	FBtr0070339	0.7624	2	1	1	0.5166	-6.00	-0.1767	151	-5.70	0
FBgn0025627	FBtr0070328	1.0700	0	0	0	0.3333	NA	1.8451	15	NA	NA
FBgn0025628	FBtr0070337	0.4982	0	0	0	0.5488	-2.50	2.0702	164	-9.80	0
FBgn0025629	FBtr0070331	1.5605	0	0	0	0.4750	-4.70	0.3116	80	-5.10	0
FBgn0025630	FBtr0344156	0.1906	3	3	2	0.5081	-4.40	2.4972	862	-3.10	0
FBgn0025631	FBtr0303045	0.3829	6	6	5	0.4719	-4.20	-0.2432	926	-7.30	0
FBgn0025632	FBtr0340109	0.2081	6	6	6	0.5023	-4.90	-3.8048	444	-3.20	0
FBgn0025633	FBtr0339433	0.3776	9	9	7	0.4109	-5.90	2.8058	460	-6.30	0
FBgn0025634	FBtr0070121	0.7363	0	0	0	0.3852	-4.20	0.3207	135	-4.40	0
FBgn0025635	FBtr0070118	1.8930	0	0	0	0.4412	-4.70	1.6451	68	-9.20	0
FBgn0025637	FBtr0345314	3.7342	0	0	0	0.3611	NA	2.9182	36	NA	NA
FBgn0025638	FBtr0070122	1.5645	0	0	0	0.4167	-4.30	2.6063	144	-7.70	0
FBgn0025639	FBtr0070151	0.6602	5	5	5	0.4738	-2.70	1.8475	667	-4.30	0
FBgn0025640	FBtr0070115	0.5082	0	0	0	0.5514	-1.70	1.5704	214	-11.90	0
FBgn0025641	FBtr0070239	0.5422	4	3	3	0.5528	-1.80	1.0631	1174	-4.40	0
FBgn0025643	FBtr0301059	0.6928	0	0	0	0.5550	-7.40	0.0711	209	-10.80	0
FBgn0025674	FBtr0085942	1.0310	2	2	2	0.4475	-10.80	-0.1773	219	-2.60	0
FBgn0025676	FBtr0072603	3.4424	0	0	0	0.2712	-2.20	-3.1933	59	-5.30	0
FBgn0025678	FBtr0080837	1.3616	0	0	0	0.3934	-3.30	2.4306	183	-17.40	0
FBgn0025681	FBtr0077645	0.4080	8	8	6	0.4454	0.00	1.6090	595	-3.60	0
FBgn0025682	FBtr0089942	1.1553	0	0	0	0.5370	-7.20	1.7929	54	-4.90	0
FBgn0025683	FBtr0078154	0.9390	0	0	0	0.4885	-4.40	2.7315	262	-12.40	0
FBgn0025684	FBtr0077456	0.3471	4	4	3	0.4663	-3.30	1.2280	208	-12.20	0
FBgn0025687	FBtr0079495	0.1857	0	0	0	0.4800	-1.60	1.9111	125	-5.40	0
FBgn0025692	FBtr0332885	1.8368	0	0	0	0.4808	-7.50	0.5492	104	-7.30	0
[truncated: 6,675 more rows]

## Sheet: 6-12h embryos
Gene	Major_isoform	TE_CDS	Num_uORF(TE_uORF>0)	Num_uORF(TE_uORF>=0.1)	Num_uORF(TE_uORF>=0.5)	UTR5_GC_content	MFE_cAUG	cAUG_Kozak_score	UTR5_length	MFE_CAP	Num_stable_hairpin
[truncated: 8,997 more rows]

[truncated: 8 more sheets: 12-24h embryos, Larvae, Pupae, Female heads, Male heads, Female bodies, Male bodies, S2 cells(DMSO)]
